# Supplementary material
Source: publisher site journal article supplement (https://www.degruyterbrill.com/publication/isbn/9783110713664/downloadAsset/9783110713664_SC%20and%20SNC%20firm%20sample.xlsx)
Supplement: Supplementary file 2 [file 9783110713664_SC%20and%20SNC%20firm%20sample.xlsx]

## Sheet: SC|SNC firm sample
Stata TimeSeries	Stata CrossSection		Descriptive(CrossSectional Information)						SC Dummy	DependentVariables				IndependentVariables						PeckingOrder			InteractiveDummies			Descriptive(Financials)
year	code	company	idm	market	ids	sector	idi	industry	dsc	blev1	mlev1	blev2	mlev2	prof	growth	size	tang	risk	gdp	debtissue	equityissue	def	idef	iblev1	imlev1	stockprice	marketcap	bookdebt	equityratio	nonfindebt
2004	1	SC Firm 1	1	US	1	MAN	9000	TECH	1	0.596459	0.2141	0.334145	0.0846626	0.1036	2.78589	11.7409	0.0722455	0.114014	3.78574	-0.124224	0.104984	-0.0192401	-0.0192401	0.596459	0.2141	6.62667	287902	78432	0.403541	0.278389
2005	1	SC Firm 1	1	US	1	MAN	9000	TECH	1	0.543485	0.23282	0.272874	0.0873105	0.0941352	2.33436	11.8428	0.0779714	0.00847867	3.34522	0.0335241	0.0483875	0.0819116	0.0819116	0.543485	0.23282	6	275436	83588	0.456515	0.273062
2006	1	SC Firm 1	1	US	1	MAN	9000	TECH	1	0.580797	0.240638	0.341378	0.105988	-0.0340192	2.41358	11.8117	0.142984	0.125361	2.66663	0.0778428	0.172912	0.250755	0.250755	0.580797	0.240638	5.32	304597	96525	0.419203	0.363515
2007	1	SC Firm 1	1	US	1	MAN	9000	TECH	1	0.374084	0.154614	0.104064	0.0343237	0.00516773	2.41947	11.9609	0.127437	0.059161	1.77857	-0.202581	0.25718	0.0545987	0.0545987	0.374084	0.154614	5.14667	342367	62616	0.625916	0.301383
2008	1	SC Firm 1	1	US	1	MAN	9000	TECH	1	0.331813	0.222329	0.103061	0.0620467	0.00775153	1.49244	11.8418	0.157331	0.00350243	-0.291621	-0.0774369	0.0236533	-0.0537836	-0.0537836	0.331813	0.222329	2.64667	177578	50768	0.668187	0.255036
2009	1	SC Firm 1	1	US	1	MAN	9000	TECH	1	0.30389	0.151236	0.0748206	0.0319537	0.0595666	2.00937	11.6337	0.164817	0.0398198	-2.77553	-0.0336562	0.00928838	-0.0243679	-0.0243679	0.30389	0.151236	3.76667	256510	45706	0.69611	0.247595
2010	1	SC Firm 1	1	US	1	MAN	9000	TECH	1	0.362457	0.0933575	0.058551	0.0111388	0.136207	3.88246	11.9821	0.132514	0.0563987	2.53192	0.143558	0.0424138	0.185972	0.185972	0.362457	0.0933575	10.4967	734977	75681	0.637543	0.322807
2011	1	SC Firm 1	1	US	1	MAN	9000	TECH	1	0.449671	0.222051	0.352783	0.159952	0.10023	2.02508	12.3477	0.0639215	0.0175398	1.60145	0.286204	0.18635	0.472554	0.472554	0.449671	0.222051	9.6	729374	208186	0.550329	0.1497
2012	1	SC Firm 1	1	US	1	MAN	9000	TECH	1	0.2568	0.0519569	0.148994	0.0270188	0.120748	4.94255	12.776	0.0507099	0.00991705	2.32108	-0.0505121	0.309615	0.259103	0.259103	0.2568	0.0519569	35.5667	3174325	173967	0.7432	0.160842
2013	1	SC Firm 1	1	US	1	MAN	9000	TECH	1	0.132527	0.0244462	0.0194391	0.00196443	0.101384	7.29543	13.1488	0.0411784	0.0111424	2.21931	-0.0259333	0.368726	0.342793	0.342793	0.132527	0.0244462	92.93	9592049	145496	0.867473	0.133287
2014	1	SC Firm 1	1	US	1	MAN	9000	TECH	1	0.132619	0.0523175	0.00719254	0.00260898	0.0534106	2.53489	13.3903	0.0536583	0.039887	2.3882	0.0372727	0.235653	0.272926	0.272926	0.132619	0.0523175	32.87	3665794	202373	0.867381	0.14644
2004	2	SC Firm 2	1	US	1	MAN	2000	IND	1	0.436836	0.124723	0.19478	0.0425467	0.257147	3.50245	16.8118	0.275787	0.00145744	3.78574	-0.0117346	0.0826734	0.0709388	0.0709388	0.436836	0.124723	82.07	63482645	9046000	0.563164	0.362613
2005	2	SC Firm 2	1	US	1	MAN	2000	IND	1	0.428606	0.130855	0.16865	0.039124	0.284309	3.27544	16.868	0.272285	0.0193769	3.34522	-0.0117813	0.000438148	-0.0113432	-0.0113432	0.428606	0.130855	77.5	58476725	8804000	0.571394	0.378024
2006	2	SC Firm 2	1	US	1	MAN	2000	IND	1	0.528365	0.164296	0.261327	0.0584549	0.267728	3.21592	16.9477	0.277402	0.0136128	2.66663	0.114915	-0.183714	-0.0687987	-0.0687987	0.528365	0.164296	77.93	57228893	11251000	0.471635	0.365455
2007	2	SC Firm 2	1	US	1	MAN	2000	IND	1	0.509921	0.173951	0.289038	0.0760244	0.232243	2.9314	17.0126	0.266542	0.0199582	1.77857	0.0543047	-0.0131206	0.0411841	0.0411841	0.509921	0.173951	84.32	59796037	12592000	0.490079	0.325059
2008	2	SC Firm 2	1	US	1	MAN	2000	IND	1	0.616136	0.284811	0.406308	0.145151	0.257434	2.16332	17.0451	0.266972	0.0169004	-0.291621	0.127942	-0.159423	-0.0314814	-0.0314814	0.616136	0.284811	57.54	39906481	15892000	0.383864	0.354243
2009	2	SC Firm 2	1	US	1	MAN	2000	IND	1	0.528257	0.196814	0.311536	0.0900991	0.226239	2.68405	16.9563	0.256881	0.0204724	-2.77553	-0.0549358	0.0524037	-0.00253211	-0.00253211	0.528257	0.196814	82.67	58745229	14395000	0.471743	0.318128
2010	2	SC Firm 2	1	US	1	MAN	2000	IND	1	0.474035	0.188741	0.259074	0.0827889	0.236172	2.51156	17.0987	0.241378	0.0107847	2.53192	-0.00331609	0.0253349	0.0220188	0.0220188	0.474035	0.188741	86.3	61443668	14295000	0.525965	0.296691
2011	2	SC Firm 2	1	US	1	MAN	2000	IND	1	0.504333	0.219191	0.247924	0.0833684	0.234502	2.30089	17.2037	0.242472	0.00256278	1.60145	0.0521888	-0.080434	-0.0282452	-0.0282452	0.504333	0.219191	81.73	56799901	15945000	0.495667	0.348874
2012	2	SC Firm 2	1	US	1	MAN	2000	IND	1	0.462865	0.197291	0.250206	0.0869062	0.229395	2.3461	17.2135	0.247314	0.00285174	2.32108	-0.00782265	0.00572677	-0.00209588	-0.00209588	0.462865	0.197291	92.85	63796460	15680000	0.537135	0.301954
2013	2	SC Firm 2	1	US	1	MAN	2000	IND	1	0.478331	0.147128	0.255582	0.0606747	0.240119	3.25113	17.2453	0.257884	0.0055723	2.21931	0.0109687	-0.072459	-0.0614903	-0.0614903	0.478331	0.147128	140.25	93027298	16048000	0.521669	0.299225
2014	2	SC Firm 2	1	US	1	MAN	2000	IND	1	0.578904	0.147567	0.341352	0.061263	0.274056	3.92298	17.2756	0.272005	0.0209908	2.3882	0.0646929	0.410394	0.475087	0.475087	0.578904	0.147567	164.32	104365316	18067000	0.421096	0.360665
2004	3	SC Firm 3	1	US	1	MAN	2000	IND	1	0.541705	0.272014	0.318238	0.128587	0.0874429	1.99146	14.3182	0.273059	0.0175592	3.78574	0.0273973	-0.0145358	0.0128615	0.0128615	0.541705	0.272014	4.99	1904974	711800	0.458295	0.336606
2005	3	SC Firm 3	1	US	1	MAN	2000	IND	1	0.525876	0.231527	0.216441	0.0697956	0.116887	2.27134	14.3398	0.276089	0.020944	3.34522	-0.0247544	-0.0129961	-0.0377504	-0.0377504	0.525876	0.231527	5.85	2256356	679800	0.474124	0.39491
2006	3	SC Firm 3	1	US	1	MAN	2000	IND	1	0.616718	0.277333	0.383674	0.129278	0.10881	2.22375	14.5862	0.232187	0.000234587	2.66663	0.247242	0.0195119	0.266754	0.266754	0.616718	0.277333	6.26	2956771	1134700	0.383282	0.389315
2007	3	SC Firm 3	1	US	1	MAN	2000	IND	1	0.572746	0.324574	0.3328	0.151686	0.117181	1.76461	14.6537	0.227082	0.00354705	1.77857	-0.0391501	0.0110009	-0.0281493	-0.0281493	0.572746	0.324574	5.84167	2210186	1062100	0.427254	0.378236
2008	3	SC Firm 3	1	US	1	MAN	2000	IND	1	0.875979	0.475467	0.583275	0.152275	0.0664178	1.84235	14.188	0.217297	0.0246364	-0.291621	0.325297	-0.0363976	0.288899	0.288899	0.875979	0.475467	4.92	1863848	1689500	0.124021	0.686634
2009	3	SC Firm 3	1	US	1	MAN	2000	IND	1	0.609673	0.351541	0.24729	0.102355	0.0721702	1.73429	14.134	0.126108	0.0034732	-2.77553	-0.245986	0.244214	-0.0017726	-0.0017726	0.609673	0.351541	7.23167	2220554	1203800	0.390327	0.481438
2010	3	SC Firm 3	1	US	1	MAN	2000	IND	1	0.582394	0.299135	0.228466	0.0830951	0.0746707	1.94693	14.2138	0.12243	0.00321171	2.53192	0.0120345	0.0113712	0.0234057	0.0234057	0.582394	0.299135	9.52	2879980	1229200	0.417606	0.458732
2011	3	SC Firm 3	1	US	1	MAN	2000	IND	1	0.536441	0.296004	0.29771	0.133467	0.0879523	1.81228	14.3523	0.134227	0.00891244	1.60145	0.0131545	-0.0299276	-0.0167731	-0.0167731	0.536441	0.296004	10.03	2996935	1260100	0.463559	0.341252
2012	3	SC Firm 3	1	US	1	MAN	2000	IND	1	0.473232	0.270067	0.168756	0.0771599	0.124803	1.75227	14.4778	0.151703	0.0232629	2.32108	-0.0797349	-0.00601194	-0.0857469	-0.0857469	0.473232	0.270067	15.7675	2914676	1078400	0.526768	0.369054
2013	3	SC Firm 3	1	US	1	MAN	2000	IND	1	0.435626	0.174704	0.124481	0.0375293	0.130797	2.49352	14.5827	0.163621	0.00352889	2.21931	-0.0153042	0.00928288	-0.00602133	-0.00602133	0.435626	0.174704	26.97	4921442	1041800	0.564374	0.364165
2014	3	SC Firm 3	1	US	1	MAN	2000	IND	1	0.442333	0.180745	0.137596	0.0424924	0.140023	2.44727	14.6725	0.170039	0.0073648	2.3882	0.0281477	-0.039876	-0.0117282	-0.0117282	0.442333	0.180745	28.205	5043028	1112600	0.557667	0.361865
2004	4	SC Firm 4	1	US	0	SERV	5000	CSERV	1	0.328346	0.171646	0.198729	0.0951263	0.162389	1.91293	13.7605	0.766378	0.0104392	3.78574	0.0650147	0.0631355	0.12815	0.12815	0.328346	0.171646	22.3	1109662	229937	0.671654	0.29767
2005	4	SC Firm 4	1	US	0	SERV	5000	CSERV	1	0.406338	0.264503	0.29364	0.179264	0.149626	1.53623	13.9337	0.797529	0.00772558	3.34522	0.138507	-0.018617	0.11989	0.11989	0.406338	0.264503	19.39	970030	348847	0.593662	0.247137
2006	4	SC Firm 4	1	US	0	SERV	5000	CSERV	1	0.28471	0.163379	0.156468	0.0834149	0.397801	1.74263	14.0213	0.798732	0.00414586	2.66663	-0.0713991	0.117823	0.0464238	0.0464238	0.28471	0.163379	26.38	1428189	278904	0.71529	0.247668
2007	4	SC Firm 4	1	US	0	SERV	5000	CSERV	1	0.321156	0.278697	0.197378	0.167252	0.397801	1.15235	14.1484	0.720254	0.00759755	1.77857	0.0706079	-0.0172003	0.0534075	0.0534075	0.321156	0.278697	17.26	925261	357503	0.678844	0.228144
2008	4	SC Firm 4	1	US	0	SERV	5000	CSERV	1	0.261977	0.215289	0.112017	0.0888371	0.153013	1.21686	14.2808	0.734241	0.00479266	-0.291621	-0.0279055	0.0549685	0.027063	0.027063	0.261977	0.215289	21.95	1177627	323088	0.738023	0.289401
2009	4	SC Firm 4	1	US	0	SERV	5000	CSERV	1	0.204718	0.181453	0.0497697	0.0431582	0.17028	1.12821	14.3766	0.679239	0.0122307	-2.77553	-0.0397758	0.0241294	-0.0156464	-0.0156464	0.204718	0.181453	22.5	1220358	270526	0.795282	0.28692
2010	4	SC Firm 4	1	US	0	SERV	5000	CSERV	1	0.19649	0.153072	0.0334663	0.0249527	0.157715	1.28364	14.4448	0.67866	0.00650388	2.53192	0.016388	0.0276984	0.0440864	0.0440864	0.19649	0.153072	20.39	1632982	295142	0.80351	0.320134
2011	4	SC Firm 4	1	US	0	SERV	5000	CSERV	1	0.270445	0.188373	0.108508	0.0708093	0.397801	1.43569	14.5149	0.628729	0.00261847	1.60145	0.10003	-0.030619	0.0694105	0.0694105	0.270445	0.188373	26.68	2018088	468383	0.729555	0.347339
2012	4	SC Firm 4	1	US	0	SERV	5000	CSERV	1	0.227853	0.16171	0.0918193	0.0619948	0.397801	1.40902	14.6098	0.65897	0.004632	2.32108	-0.0305037	-0.0176521	-0.0481558	-0.0481558	0.227853	0.16171	28.28	2141372	413082	0.772147	0.295254
2013	4	SC Firm 4	1	US	0	SERV	5000	CSERV	1	0.251894	0.176669	0.0945294	0.0623806	0.397801	1.4258	14.6196	0.602579	0.0114903	2.21931	0.0258174	-0.0810612	-0.0552437	-0.0552437	0.251894	0.176669	29.4	2144931	460255	0.748106	0.298006
2014	4	SC Firm 4	1	US	0	SERV	5000	CSERV	1	0.392688	0.303316	0.264641	0.195052	0.397801	1.29465	14.8181	0.531759	0.0352421	2.3882	0.205352	0.0216282	0.22698	0.22698	0.392688	0.303316	30.57	2215974	964772	0.607312	0.283436
2004	5	SC Firm 5	1	US	0	SERV	4000	HCARE	1	0.494365	0.163473	0.317944	0.085231	0.190007	3.02413	16.7951	0.208842	0.0191965	3.78574	0.0436111	0.0393377	0.0829488	0.0829488	0.494365	0.163473	22.3208	72775102	14221632	0.505635	0.266311
2005	5	SC Firm 5	1	US	0	SERV	4000	HCARE	1	0.485322	0.188987	0.306655	0.0985289	0.196915	2.56801	16.9218	0.206002	0.00358651	3.34522	-0.00270329	0.00279185	8.85688e-05	8.85688e-05	0.485322	0.188987	18.8662	60692035	14142855	0.514678	0.277697
2006	5	SC Firm 5	1	US	0	SERV	4000	HCARE	1	0.611529	0.228075	0.468954	0.14218	0.155203	2.68126	16.928	0.192006	0.0269861	2.66663	0.220606	-0.00299413	0.217612	0.217612	0.611529	0.228075	23.3064	74879115	22123986	0.388471	0.268478
2007	5	SC Firm 5	1	US	0	SERV	4000	HCARE	1	0.552335	0.201311	0.407229	0.123071	0.165998	2.74369	17.0703	0.189308	0.00507274	1.77857	-0.00474901	0.0626297	0.0578807	0.0578807	0.552335	0.201311	26.8663	87027454	21935384	0.447665	0.244793
2008	5	SC Firm 5	1	US	0	SERV	4000	HCARE	1	0.587933	0.231366	0.395691	0.121373	0.184137	2.54114	17.2008	0.170186	0.0151998	-0.291621	0.0708233	-0.0782326	-0.00740924	-0.00740924	0.587933	0.231366	25.5361	82853346	24939653	0.412067	0.318119
2009	5	SC Firm 5	1	US	0	SERV	4000	HCARE	1	0.556703	0.259002	0.413827	0.164225	0.178717	2.14942	17.2419	0.144908	0.00127883	-2.77553	0.0823991	0.043978	0.126377	0.126377	0.556703	0.259002	25.8328	83747538	29272329	0.443297	0.246881
2010	5	SC Firm 5	1	US	0	SERV	4000	HCARE	1	0.607276	0.331693	0.442978	0.203347	0.175704	1.83084	17.3756	0.131591	0.00466602	2.53192	0.124026	-0.0230061	0.10102	0.10102	0.607276	0.331693	22.9236	74116001	36785050	0.392724	0.313316
2011	5	SC Firm 5	1	US	0	SERV	4000	HCARE	1	0.582878	0.284633	0.380068	0.148622	0.0767956	2.04782	16.8792	0.13063	0.0750134	1.60145	-0.0273901	-0.00560021	-0.0329903	-0.0329903	0.582878	0.284633	26.9045	88302401	35134060	0.417122	0.338811
2012	5	SC Firm 5	1	US	0	SERV	4000	HCARE	1	0.592013	0.278202	0.419965	0.161297	0.0616048	2.12799	16.7626	0.119923	0.00429055	2.32108	0.069457	-0.0142109	0.0552461	0.0552461	0.592013	0.278202	31.34	103271721	39804000	0.407987	0.307176
2013	5	SC Firm 5	1	US	0	SERV	4000	HCARE	1	0.403138	0.225896	0.191083	0.092607	0.0896794	1.78462	16.7939	0.137476	0.0208111	2.21931	-0.250069	0.00880032	-0.241269	-0.241269	0.403138	0.225896	38.33	59338607	17316000	0.596862	0.272996
2014	5	SC Firm 5	1	US	0	SERV	4000	HCARE	1	0.478474	0.22534	0.255825	0.0982843	0.104446	2.12334	16.8235	0.143792	0.0122204	2.3882	0.0589461	-0.121284	-0.062338	-0.062338	0.478474	0.22534	45.02	67891755	19749000	0.521526	0.299188
2004	6	SC Firm 6	1	US	0	SERV	5000	CSERV	1	0.481279	0.106158	0.0693163	0.00944368	0.326977	4.53361	14.5192	0.495396	0.0180313	3.78574	0.258902	-0.208	0.0509018	0.0509018	0.481279	0.106158	65.18	5619741	667433	0.518721	0.478722
2005	6	SC Firm 6	1	US	0	SERV	5000	CSERV	1	0.422472	0.0958539	0.0537747	0.00816898		4.40745	14.8337	0.454598	0.0510374	3.34522	0.0495452	0.0559138	0.105459	0.105459	0.422472	0.0958539	69.63	7131995	756105	0.577528	0.41116
2006	6	SC Firm 6	1	US	0	SERV	5000	CSERV	1	0.361366	0.10306	0.0187214	0.0038592	0.35775	3.50638	15.0149	0.485876	0.0212964	2.66663	0.0250308	0.0204602	0.0454911	0.0454911	0.361366	0.10306	79.97	7070198	812376	0.638634	0.362702
2007	6	SC Firm 6	1	US	0	SERV	5000	CSERV	1	0.360958	0.372044	0.0257463	0.0269715	0.374913	0.970203	15.1238	0.513434	0.0075133	1.77857	0.0445623	-0.0779172	-0.0333549	-0.0333549	0.360958	0.372044	23.07	1564296	926794	0.639042	0.352829
2008	6	SC Firm 6	1	US	0	SERV	5000	CSERV	1	0.340048	0.258714	0.0770592	0.0535262	0.269715	1.31438	15.0637	0.49107	0.0797346	-0.291621	0.0146493	0.0159351	0.0305844	0.0305844	0.340048	0.258714	34.85	2775063	968518	0.659952	0.296914
2009	6	SC Firm 6	1	US	0	SERV	5000	CSERV	1	0.335525	0.183276	0.0365894	0.0165981	0.179564	1.83071	14.89	0.44085	0.0676302	-2.77553	-0.00769385	0.0200725	0.0123787	0.0123787	0.335525	0.183276	57.63	4219217	946807	0.664475	0.326995
2010	6	SC Firm 6	1	US	0	SERV	5000	CSERV	1	0.345791	0.20094	0.0344057	0.0166695	0.177239	1.72087	15.0593	0.392586	0.00309514	2.53192	0.0239031	-0.0133905	0.0105126	0.0105126	0.345791	0.20094	48.84	4044683	1017116	0.654209	0.333875
2011	6	SC Firm 6	1	US	0	SERV	5000	CSERV	1	0.380393	0.228375	0.0290828	0.0142349	0.177492	1.66565	15.2406	0.384106	0.0024197	1.60145	0.0540838	-0.0353737	0.0187101	0.0187101	0.380393	0.228375	47.97	4006186	1185697	0.619607	0.361833
2012	6	SC Firm 6	1	US	0	SERV	5000	CSERV	1	0.391355	0.301927	0.0339718	0.0231084	0.202235	1.29619	15.322	0.437916	0.0172652	2.32108	-0.00554462	-0.0973134	-0.102858	-0.102858	0.391355	0.301927	32.91	2703103	1169133	0.608645	0.369951
2013	6	SC Firm 6	1	US	0	SERV	5000	CSERV	1	0.393373	0.38788	0.101664	0.0995763	0.156052	1.01416	15.2306	0.396823	0.037923	2.21931	-0.0167061	-0.0272831	-0.0439892	-0.0439892	0.393373	0.38788	28.64	1769863	1121504	0.606627	0.324721
2004	7	SC Firm 7	1	US	1	MAN	2000	IND	1	0.813992	0.210455	0.0441668	0.00280665	0.255145	3.86778	16.5311	0.0803578	0.00996934	3.78574	0.112159	-0.00412929	0.10803	0.10803	0.813992	0.210455	27	24471451	6522909	0.186008	0.686634
2005	7	SC Firm 7	1	US	1	MAN	2000	IND	1	0.809929	0.250096	0.0422946	0.00344449	0.257225	3.23847	16.6543	0.0774459	0.00188839	3.34522	0.0817103	-0.078566	0.00314434	0.00314434	0.809929	0.250096	28.87	21753284	7254817	0.190071	0.686634
2006	7	SC Firm 7	1	US	1	MAN	2000	IND	1	0.798775	0.236533	0.0264173	0.00211328	0.225853	3.37701	16.7185	0.0766194	0.0261189	2.66663	0.0349082	-0.0459544	-0.0110463	-0.0110463	0.798775	0.236533	36.93	24486755	7586357	0.201225	0.686634
2007	7	SC Firm 7	1	US	1	MAN	2000	IND	1	0.805056	0.216779	0.0124255	0.000842543	0.275746	3.71372	16.8814	0.0751891	0.0322367	1.77857	0.0991625	-0.0531635	0.0459989	0.0459989	0.805056	0.216779	36.03	31259884	8652072	0.194944	0.686634
2008	7	SC Firm 7	1	US	1	MAN	2000	IND	1	0.792494	0.245223	0.00320723	0.000273642	0.284379	3.23173	17.0469	0.064537	0.00732356	-0.291621	0.0946636	-0.0225945	0.0720691	0.0720691	0.792494	0.245223	32.79	30242981	9825761	0.207506	0.686634
2009	7	SC Firm 7	1	US	1	MAN	2000	IND	1	0.762792	0.284381	0.000328391	4.05937e-05	0.276746	2.68229	16.9584	0.0572095	0.00613706	-2.77553	-0.038936	-0.0401621	-0.0790981	-0.0790981	0.762792	0.284381	41.5	23524879	9348572	0.237208	0.686634
2010	7	SC Firm 7	1	US	1	MAN	2000	IND	1	0.77377	0.282255	0.000546585	6.2875e-05	0.264823	2.74139	16.9551	0.0513873	0.00581533	2.53192	0.0454186	-0.0538081	-0.00838947	-0.00838947	0.77377	0.282255	48.49	25254866	9931531	0.22623	0.686634
2011	7	SC Firm 7	1	US	1	MAN	2000	IND	1	0.748835	0.241398	0.00111714	0.000119354	0.253328	3.10207	17.1243	0.0499145	0.00504721	1.60145	0.11752	-0.0381211	0.0793992	0.0793992	0.748835	0.241398	53.23	37019939	11780302	0.251165	0.686634
2012	7	SC Firm 7	1	US	1	MAN	2000	IND	1	0.744898	0.229457	7.76213e-06	7.91597e-07	0.268027	3.24636	17.2093	0.0467732	0.00828002	2.32108	0.038027	-0.0793593	-0.0413323	-0.0413323	0.744898	0.229457	66.5	41687839	12414038	0.255102	0.686634
2013	7	SC Firm 7	1	US	1	MAN	2000	IND	1	0.69556	0.195938	0.00496066	0.000531454	0.276259	3.54989	17.2298	0.0462247	0.00614317	2.21931	-0.0404335	-0.0760047	-0.116438	-0.116438	0.69556	0.195938	82.22	48144177	11732045	0.30444	0.686634
2014	7	SC Firm 7	1	US	1	MAN	2000	IND	1	0.669235	0.183987	0.00448728	0.000502055	0.273459	3.63739	17.2773	0.0442512	0.00159823	2.3882	0.0149265	-0.0497769	-0.0348504	-0.0348504	0.669235	0.183987	89.31	53220435	11999683	0.330765	0.678828
2005	8	SC Firm 8	1	US	1	MAN	2000	IND	1	0.621069	0.402772	0.405204	0.218942	0.118903	1.54199	14.5916	0.151984	0.00896722	3.34522	0.0235797	0.017937	0.0415167	0.0415167	0.621069	0.402772	26.4778	1328163	895715	0.378931	0.366186
2006	8	SC Firm 8	1	US	1	MAN	2000	IND	1	0.61552	0.325724	0.401126	0.168129	0.126798	1.8897	14.4258	0.146296	0.010689	2.66663	-0.00473092	-0.0491477	-0.0538786	-0.0538786	0.61552	0.325724	43.3304	1840061	888883	0.38448	0.36698
2007	8	SC Firm 8	1	US	1	MAN	2000	IND	1	0.573882	0.289763	0.34547	0.137852	0.156826	1.98052	14.4909	0.100139	0.0225849	1.77857	0.0244649	0.00771077	0.0321757	0.0321757	0.573882	0.289763	45	2275750	928464	0.426118	0.359748
2008	8	SC Firm 8	1	US	1	MAN	2000	IND	1	0.574407	0.316284	0.377737	0.172228	0.219422	1.81611	14.5219	0.11465	0.041177	-0.291621	-0.08469	-0.101462	-0.186152	-0.186152	0.574407	0.316284	34.91	1749176	809162	0.425593	0.333082
2009	8	SC Firm 8	1	US	1	MAN	2000	IND	1	0.469161	0.307669	0.25263	0.145274	0.166976	1.52489	14.3208	0.112993	0.0394955	-2.77553	-0.157803	0.0374306	-0.120372	-0.120372	0.469161	0.307669	35.64	1362528	605501	0.530839	0.299768
2010	8	SC Firm 8	1	US	1	MAN	2000	IND	1	0.531391	0.328726	0.333964	0.177995	0.134145	1.61652	14.3022	0.0920458	0.0207811	2.53192	0.12869	-0.0234989	0.105192	0.105192	0.531391	0.328726	57.67	1631592	799000	0.468609	0.303206
2011	8	SC Firm 8	1	US	1	MAN	2000	IND	1	0.503318	0.296226	0.308162	0.156127	0.142544	1.6991	14.4009	0.0896457	0.00541732	1.60145	0.00313009	0.00425692	0.007387	0.007387	0.503318	0.296226	53	1910148	804000	0.496682	0.30487
2012	8	SC Firm 8	1	US	1	MAN	2000	IND	1	0.500605	0.244882	0.289541	0.116486	0.149692	2.04427	14.4749	0.0801428	0.00656297	2.32108	0.0377109	-0.0116875	0.0260234	0.0260234	0.500605	0.244882	67.73	2681189	869500	0.499395	0.316311
2013	8	SC Firm 8	1	US	1	MAN	2000	IND	1	0.449837	0.190777	0.252391	0.0887058	0.142242	2.35792	14.5522	0.0776867	0.00466683	2.21931	-0.00688097	0.0393949	0.0325139	0.0325139	0.449837	0.190777	109.32	3632611	856400	0.550163	0.292415
2014	8	SC Firm 8	1	US	1	MAN	2000	IND	1	0.435977	0.151015	0.223599	0.0621542	0.157819	2.88697	14.6883	0.0703933	0.0121338	2.3882	0.0406665	0.00978582	0.0504524	0.0504524	0.435977	0.151015	140.07	5309827	944500	0.564023	0.300499
2010	9	SC Firm 9	1	US	0	SERV	5000	CSERV	1	0.487582	0.355227	0.386744	0.267474	0.195776	1.37259	13.9232	0.194907	0.00913329	2.53192	-0.0693764	0.0436246	-0.0257518	-0.0257518	0.487582	0.355227	12.21	1156377	637087	0.512418	0.228994
2011	9	SC Firm 9	1	US	0	SERV	5000	CSERV	1	0.423487	0.316462	0.281335	0.197903	0.203334	1.33819	13.9383	0.20553	0.00730692	1.60145	-0.0933032	-0.0292746	-0.122578	-0.122578	0.423487	0.316462	17.46	1127629	522065	0.576513	0.278078
2012	9	SC Firm 9	1	US	0	SERV	5000	CSERV	1	0.39828	0.23978	0.261839	0.14459	0.183886	1.66102	13.8814	0.194284	0.00535571	2.32108	-0.0412771	-0.0451736	-0.0864507	-0.0864507	0.39828	0.23978	36.98	1499765	473040	0.60172	0.264757
2013	9	SC Firm 9	1	US	0	SERV	5000	CSERV	1	0.415792	0.172685	0.2912	0.107532	0.15096	2.40781	13.8759	0.163913	0.00916916	2.21931	0.0583223	0.0374473	0.0957696	0.0957696	0.415792	0.172685	20.27	2636036	550218	0.584208	0.243961
2014	9	SC Firm 9	1	US	0	SERV	5000	CSERV	1	0.407201	0.272285	0.263235	0.16291	0.135632	1.4955	13.8354	0.133281	0.0196485	2.3882	-0.00886705	0.0165454	0.00767832	0.00767832	0.407201	0.272285	20.92	1439189	538492	0.592799	0.256408
2004	10	SC Firm 10	1	US	1	MAN	9000	TECH	1	0.232941	0.0290522	0	0	0.343945	7.29543	14.3263	0.0508901	0.0413559	3.78574	0.0100662	-0.0278449	-0.0177787	-0.0177787	0.232941	0.0290522	31.37	15248094	456246	0.767059	0.273229
2005	10	SC Firm 10	1	US	1	MAN	9000	TECH	1	0.20374	0.0282686	0	0	0.324849	7.20728	14.4917	0.0424326	0.00257854	3.34522	0.0167778	-0.0651609	-0.0483831	-0.0483831	0.20374	0.0282686	36.96	17090853	497189	0.79626	0.236031
2006	10	SC Firm 10	1	US	1	MAN	9000	TECH	1	0.124101	0.031029	0	0	0.143989	3.99951	14.7615	0.038104	0.129833	2.66663	0.0407155	0.410394	0.45111	0.45111	0.124101	0.031029	41.12	23107343	739957	0.875899	0.135961
2007	10	SC Firm 10	1	US	1	MAN	9000	TECH	1	0.160099	0.036599	0	0	0.200858	4.3744	14.9654	0.050713	0.0384205	1.77857	0.0305927	-0.200829	-0.170236	-0.170236	0.160099	0.036599	42.73	24079175	914754	0.839901	0.186167
2008	10	SC Firm 10	1	US	1	MAN	9000	TECH	1	0.222261	0.0959975	0.0717554	0.0279224	0.22812	2.31528	15.0908	0.0537717	0.0225891	-0.291621	0.0651302	-0.196348	-0.131217	-0.131217	0.222261	0.0959975	21.29	12184731	1293916	0.777739	0.182294
2009	10	SC Firm 10	1	US	1	MAN	9000	TECH	1	0.293754	0.103689	0.162785	0.0513041	0.134433	2.83303	14.8959	0.0532985	0.0577345	-2.77553	0.116072	0.0314277	0.1475	0.1475	0.293754	0.103689	36.78	18491605	2139183	0.706246	0.191105
2010	10	SC Firm 10	1	US	1	MAN	9000	TECH	1	0.349541	0.16288	0.223302	0.0942832	0.158889	2.146	15.1505	0.0551373	0.0172198	2.53192	0.0867789	-0.0649256	0.0218533	0.0218533	0.349541	0.16288	30.78	14625279	2845663	0.650459	0.175196
2011	10	SC Firm 10	1	US	1	MAN	9000	TECH	1	0.336604	0.185081	0.202474	0.102043	0.160832	1.81868	15.2545	0.0587051	0.00586796	1.60145	0.0201091	0.0135031	0.0336123	0.0336123	0.336604	0.185081	28.27	13325649	3026468	0.663396	0.18838
2012	10	SC Firm 10	1	US	1	MAN	9000	TECH	1	0.303204	0.151108	0.177343	0.0810398	0.145203	2.00654	15.298	0.066164	0.0112308	2.32108	0.00176958	0.0554779	0.0572475	0.0572475	0.303204	0.151108	37.68	17101909	3044235	0.696796	0.185941
2013	10	SC Firm 10	1	US	1	MAN	9000	TECH	1	0.315986	0.104268	0.175752	0.0509898	0.0742221	3.03052	15.2155	0.0635602	0.0523114	2.21931	0.0227156	0.017178	0.0398937	0.0398937	0.315986	0.104268	59.879	28177700	3280030	0.684014	0.206323
2014	10	SC Firm 10	1	US	1	MAN	9000	TECH	1	0.34004	0.0909575	0.17542	0.039674	0.0691795	3.73845	15.2379	0.0727921	0.00224223	2.3882	0.0359341	0.00209738	0.0380315	0.0380315	0.34004	0.0909575	72.7	36654621	3667609	0.65996	0.231379
2004	11	SC Firm 11	1	US	1	MAN	2000	IND	1	0.404646	0.104997	0	0	0.15458	3.85387	11.8611	0.0369674	0.00507846	3.78574	0.042568	0.161668	0.204236	0.204236	0.404646	0.104997	23.835	841886	98766	0.595354	0.404646
2005	11	SC Firm 11	1	US	1	MAN	2000	IND	1	0.456673	0.104866	0	0	0.163982	4.35483	12.014	0.0357197	0.00753988	3.34522	0.0920331	-0.0878354	0.00419776	0.00419776	0.456673	0.104866	26.77	1055852	123694	0.543327	0.456673
2006	11	SC Firm 11	1	US	1	MAN	2000	IND	1	0.516155	0.137996	0	0	0.128925	3.74037	12.154	0.0608756	0.0260173	2.66663	0.083921	-0.126133	-0.0422121	-0.0422121	0.516155	0.137996	32.095	922687	147710	0.483845	0.516155
2007	11	SC Firm 11	1	US	1	MAN	2000	IND	1	0.598416	0.160417	0	0	0.148613	3.73038	12.2518	0.0750441	0.0112131	1.77857	0.114302	-0.157308	-0.0430069	-0.0430069	0.598416	0.160417	11.15	955606	182585	0.401584	0.598416
2008	11	SC Firm 11	1	US	1	MAN	2000	IND	1	0.687284	0.457285	0	0	0.112067	1.50297	12.3141	0.108	0.0301506	-0.291621	0.109955	-0.142599	-0.0326442	-0.0326442	0.687284	0.457285	15.325	257966	217359	0.312716	0.686634
2007	12	SC Firm 12	1	US	1	MAN	2000	IND	1	0.539101	0.293008	0.239994	0.100629	0.109867	1.83989	15.7366	0.157281	0.0165013	1.77857	0.0156655	0.0734815	0.089147	0.089147	0.539101	0.293008	67.98	6227641	2581000	0.460899	0.42773
2008	12	SC Firm 12	1	US	1	MAN	2000	IND	1	0.571648	0.566593	0.227516	0.223913	0.141096	1.00892	15.9285	0.1637	0.0225045	-0.291621	0.0507387	-0.0899935	-0.0392549	-0.0392549	0.571648	0.566593	23.59	2166605	2832400	0.428352	0.467304
2009	12	SC Firm 12	1	US	1	MAN	2000	IND	1	0.497509	0.454085	0.206927	0.179791	0.0737562	1.09563	15.6898	0.18204	0.0476722	-2.77553	-0.0690952	0.0507712	-0.018324	-0.018324	0.497509	0.454085	32.34	2989952	2487000	0.502491	0.390146
2010	12	SC Firm 12	1	US	1	MAN	2000	IND	1	0.491935	0.361762	0.206304	0.132067	0.088819	1.35983	15.7465	0.170097	0.00993389	2.53192	0.034505	0.00549946	0.0400044	0.0400044	0.491935	0.361762	50.66	4718652	2674600	0.508065	0.378984
2011	12	SC Firm 12	1	US	1	MAN	2000	IND	1	0.560781	0.493527	0.315591	0.260314	0.107907	1.13627	15.9872	0.168467	0.0166598	1.60145	0.192237	-0.0217853	0.170451	0.170451	0.560781	0.493527	42.97	4176458	4069700	0.439219	0.384749
2012	12	SC Firm 12	1	US	1	MAN	2000	IND	1	0.519879	0.457742	0.257659	0.212962	0.122446	1.13575	16.1143	0.182095	0.00613299	2.32108	-0.00716154	-0.000284908	-0.00744645	-0.00744645	0.519879	0.457742	49.12	4755602	4014400	0.480121	0.384664
2013	12	SC Firm 12	1	US	1	MAN	2000	IND	1	0.495023	0.42025	0.226831	0.178267	0.137472	1.17793	16.1938	0.189873	0.00994227	2.21931	0.0193155	-0.000509551	0.018806	0.018806	0.495023	0.42025	59.19	5762884	4177400	0.504977	0.376641
2014	12	SC Firm 12	1	US	1	MAN	2000	IND	1	0.50144	0.479271	0.228469	0.213207	0.1316	1.04626	16.0901	0.206925	0.00922502	2.3882	-0.0633865	-0.127598	-0.190984	-0.190984	0.50144	0.479271	45.2	4029403	3708600	0.49856	0.386092
2004	13	SC Firm 13	1	US	1	MAN	2000	IND	1	0.50042	0.226621	0.243696	0.0861408	0.0384938	2.20818	15.332	0.137738	0.0870864	3.78574	0.0142777	0.0526316	0.0669093	0.0669093	0.50042	0.226621	16.2379	12200238	3575000	0.49958	0.339446
2005	13	SC Firm 13	1	US	1	MAN	2000	IND	1	0.395497	0.142095	0	0	0.0694712	2.78333	15.3599	0.126648	0.0240345	3.34522	-0.134054	0.0274033	-0.106651	-0.106651	0.395497	0.142095	22.4298	16120236	2670000	0.604503	0.395497
2006	13	SC Firm 13	1	US	1	MAN	2000	IND	1	0.504953	0.203937	0.291375	0.0936049	0.0884788	2.47602	15.4195	0.10517	0.0164609	2.66663	0.142625	-0.208	-0.0653758	-0.0653758	0.504953	0.203937	24.9208	14524800	3721000	0.495047	0.301398
2007	13	SC Firm 13	1	US	1	MAN	2000	IND	1	0.571882	0.240608	0.39222	0.132748	0.102198	2.37682	15.5056	0.106037	0.00849706	1.77857	0.0792957	-0.139264	-0.0599682	-0.0599682	0.571882	0.240608	26.2723	13634500	4320000	0.428118	0.295605
2008	13	SC Firm 13	1	US	1	MAN	2000	IND	1	0.634794	0.364157	0.453672	0.214831	0.138433	1.74319	15.5689	0.117597	0.0245952	-0.291621	0.0182674	-0.184672	-0.166405	-0.166405	0.634794	0.364157	11.1768	7766500	4448000	0.365206	0.331526
2004	14	SC Firm 14	1	US	1	MAN	1000	BMAT	1	0.478905	0.280062	0.313899	0.162237	0.155701	1.71	15.766	0.567926	0.00621785	3.78574	-0.0134855	0.0330465	0.019561	0.019561	0.478905	0.280062	53.5935	12360676	4808400	0.521095	0.318981
2005	14	SC Firm 14	1	US	1	MAN	1000	BMAT	1	0.48313	0.291284	0.316713	0.169304	0.159625	1.65862	15.8532	0.555078	0.00435623	3.34522	0.0211744	-0.0271021	-0.00592768	-0.00592768	0.48313	0.291284	54.7214	12235469	5028800	0.51687	0.323726
2006	14	SC Firm 14	1	US	1	MAN	1000	BMAT	1	0.485086	0.273332	0.331106	0.165027	0.155411	1.77471	15.8805	0.546629	0.000179613	2.66663	0.0353108	-0.00440044	0.0309104	0.0309104	0.485086	0.273332	64.9741	14418920	5423600	0.514914	0.304713
2007	14	SC Firm 14	1	US	1	MAN	1000	BMAT	1	0.510154	0.234749	0.371649	0.148368	0.167842	2.17319	16.0291	0.515723	0.00924329	1.77857	0.0817331	-0.0213989	0.0603341	0.0603341	0.510154	0.234749	91.1838	21053172	6458300	0.489846	0.276164
2008	14	SC Firm 14	1	US	1	MAN	1000	BMAT	1	0.549983	0.325344	0.412174	0.216716	0.190139	1.69046	16.1587	0.526183	0.0110021	-0.291621	0.0362492	-0.08556	-0.0493107	-0.0493107	0.549983	0.325344	46.4748	14337329	6914000	0.450017	0.284282
2009	14	SC Firm 14	1	US	1	MAN	1000	BMAT	1	0.604746	0.324667	0.466414	0.215475	0.154439	1.86267	15.9265	0.526483	0.021969	-2.77553	0.074088	-0.0577093	0.0163787	0.0163787	0.604746	0.324667	74.9403	16389571	7879300	0.395254	0.28672
2010	14	SC Firm 14	1	US	1	MAN	1000	BMAT	1	0.564487	0.300971	0.412405	0.189064	0.163462	1.87555	15.9691	0.52209	0.00869698	2.53192	-0.0189103	0.00848518	-0.0104251	-0.0104251	0.564487	0.300971	84.0836	17707153	7623900	0.435513	0.283632
2011	14	SC Firm 14	1	US	1	MAN	1000	BMAT	1	0.555375	0.330854	0.417892	0.221289	0.167668	1.67861	16.0849	0.505413	0.00498062	1.60145	0.0218884	-0.0192643	0.00262408	0.00262408	0.555375	0.330854	78.7585	16051848	7936700	0.444625	0.275242
2012	14	SC Firm 14	1	US	1	MAN	1000	BMAT	1	0.578085	0.357888	0.425397	0.231455	0.141124	1.61527	16.0785	0.486406	0.012581	2.32108	0.109616	0.00938507	0.119002	0.119002	0.578085	0.357888	77.6768	17571755	9793800	0.421915	0.305322
2013	14	SC Firm 14	1	US	1	MAN	1000	BMAT	1	0.559145	0.307232	0.443587	0.217992	0.145579	1.81994	16.136	0.502742	0.00231322	2.21931	0.0104761	0.0173332	0.0278094	0.0278094	0.559145	0.307232	103.341	22505373	9980800	0.440855	0.254027
2014	14	SC Firm 14	1	US	1	MAN	1000	BMAT	1	0.529712	0.253056	0.422554	0.180397	0.150818	2.09326	16.1611	0.536141	0.00157609	2.3882	-0.0316664	0.00816689	-0.0234995	-0.0234995	0.529712	0.253056	133.341	27798396	9417800	0.470288	0.241565
2005	15	SC Firm 15	1	US	1	MAN	9000	TECH	1	0.299815	0.0806284	0.242655	0.0615813	0.109398	3.71848	12.5536	0.0503478	0.129833	3.34522	-0.0464263	0.410394	0.363968	0.363968	0.299815	0.0806284	19.93	3047737	267285	0.700185	0.0775952
2006	15	SC Firm 15	1	US	1	MAN	9000	TECH	1	0.23498	0.0332911	0.173206	0.0229487	0.0991168	7.05833	12.9684	0.0694132	0.0111088	2.66663	0.0207976	0.218824	0.239622	0.239622	0.23498	0.0332911	53.12	8515079	293239	0.76502	0.0775952
2007	15	SC Firm 15	1	US	1	MAN	9000	TECH	1	0.179642	0.0491853	0.128243	0.0335845	0.130832	3.65234	13.3636	0.0812453	0.0147163	1.77857	0.00256998	0.182901	0.185471	0.185471	0.179642	0.0491853	34.6	5750957	297495	0.820358	0.0775952
2008	15	SC Firm 15	1	US	1	MAN	9000	TECH	1	0.16597	0.10885	0.113	0.0725249	0.166327	1.52476	13.581	0.0927632	0.0189337	-0.291621	0.00780775	0.0345995	0.0424073	0.0424073	0.16597	0.10885	15.09	2555819	312181	0.83403	0.0775952
2009	15	SC Firm 15	1	US	1	MAN	9000	TECH	1	0.167083	0.0743967	0.103047	0.0440068	0.165953	2.24584	13.6644	0.0873787	0.00488606	-2.77553	0.0175362	0.0115156	0.0290518	0.0290518	0.167083	0.0743967	25.34	4339433	348788	0.832917	0.0775952
2010	15	SC Firm 15	1	US	1	MAN	9000	TECH	1	0.0846403	0.0244462	0	0	0.168788	3.8062	13.8388	0.108782	0.000445656	2.53192	-0.073838	0.11377	0.0399316	0.0399316	0.0846403	0.0244462	47.05	8779689	175071	0.91536	0.0775952
2011	15	SC Firm 15	1	US	1	MAN	9000	TECH	1	0.0846403	0.0319729	0	0	0.201252	2.5236	13.9627	0.124938	0.0153963	1.60145	0.00604562	-0.0947597	-0.0887141	-0.0887141	0.0846403	0.0319729	32.28	5729849	189251	0.91536	0.0806868
2012	15	SC Firm 15	1	US	1	MAN	9000	TECH	1	0.0980044	0.0338568	0	0	0.201814	2.89467	14.1332	0.132695	0.00450292	2.32108	0.0252331	-0.00556981	0.0196633	0.0196633	0.0980044	0.0338568	40.91	7273095	254873	0.901996	0.0980044
2013	15	SC Firm 15	1	US	1	MAN	9000	TECH	1	0.109382	0.0369778	0	0	0.203973	2.95804	14.2716	0.152243	0.0129415	2.21931	0.0232087	-0.00171519	0.0214935	0.0214935	0.109382	0.0369778	47.18	8425437	323517	0.890618	0.110983
2014	15	SC Firm 15	1	US	1	MAN	9000	TECH	1	0.25413	0.0830626	0.168506	0.0511257	0.185422	3.0595	14.4904	0.15034	0.0127308	2.3882	0.173282	0.0041279	0.17741	0.17741	0.25413	0.0830626	62.96	11225806	1016912	0.74587	0.112796
2006	16	SC Firm 16	1	US	1	MAN	1000	BMAT	1	0.553833	0.291541	0.393536	0.177037	0.150041	1.89967	14.6778	0.387523	0.0296946	2.66663	-0.00854263	-0.0450219	-0.0535645	-0.0535645	0.553833	0.291541	35.9	3405474	1401402	0.446167	0.304177
2007	16	SC Firm 16	1	US	1	MAN	1000	BMAT	1	0.51236	0.271399	0.343207	0.1563	0.148444	1.88785	14.664	0.365553	0.00384155	1.77857	0.0190854	0.025191	0.0442764	0.0442764	0.51236	0.271399	41.25	3907778	1455624	0.48764	0.295237
2008	16	SC Firm 16	1	US	1	MAN	1000	BMAT	1	0.602951	0.460549	0.449745	0.314835	0.138179	1.3092	14.7186	0.352401	0.00814589	-0.291621	0.0962448	-0.134808	-0.0385635	-0.0385635	0.602951	0.460549	22.3	2028854	1732108	0.397049	0.304479
2009	16	SC Firm 16	1	US	1	MAN	1000	BMAT	1	0.535591	0.308444	0.387034	0.196265	0.112145	1.73643	14.5114	0.370508	0.0165552	-2.77553	-0.0893678	0.00867671	-0.0806911	-0.0806911	0.535591	0.308444	36.37	3328182	1484420	0.464409	0.271742
2010	16	SC Firm 16	1	US	1	MAN	1000	BMAT	1	0.502737	0.231891	0.360734	0.144205	0.168698	2.16798	14.6753	0.327994	0.0405824	2.53192	0.0189099	-0.0110913	0.00781857	0.00781857	0.502737	0.231891	55.78	5109112	1542437	0.497263	0.257847
2011	16	SC Firm 16	1	US	1	MAN	1000	BMAT	1	0.479004	0.251134	0.3139	0.143013	0.195906	1.90736	14.8695	0.352541	0.0200406	1.60145	-0.00243241	0.059051	0.0566186	0.0566186	0.479004	0.251134	51.51	4576212	1534644	0.520996	0.264957
2012	16	SC Firm 16	1	US	1	MAN	1000	BMAT	1	0.448122	0.218092	0.269345	0.112395	0.177607	2.05474	14.7394	0.377207	0.00906352	2.32108	0.00165276	-0.000591163	0.00106159	0.00106159	0.448122	0.218092	62.12	5522406	1540325	0.551878	0.263116
2013	16	SC Firm 16	1	US	1	MAN	1000	BMAT	1	0.51	0.264856	0.380496	0.175327	0.200133	1.92558	14.6886	0.378562	0.0151132	2.21931	0.0803178	0.028986	0.109304	0.109304	0.51	0.264856	63.39	5074560	1828248	0.49	0.245083
2006	17	SC Firm 17	1	US	0	SERV	4000	HCARE	1	0.626197	0.12711	0.585828	0.109491	-0.0340192	4.92644	11.3336	0.117333	0.127079	2.66663	0.0840656	0.410394	0.49446	0.49446	0.626197	0.12711	10.0975	1434289	208860	0.373803	0.0974704
2007	17	SC Firm 17	1	US	0	SERV	4000	HCARE	1	0.696265	0.0758276	0.657284	0.0642362	-0.0340192	7.29543	11.3336	0.311882	0.0785102	1.77857	0.0716031	0.205101	0.276704	0.276704	0.696265	0.0758276	18.7575	2837334	232801	0.303735	0.113741
2008	17	SC Firm 17	1	US	0	SERV	4000	HCARE	1	0.480878	0.0722554	0.367791	0.0466312	0.0868452	6.65526	12.465	0.292922	0.129833	-0.291621	-0.00661081	0.237047	0.230436	0.230436	0.480878	0.0722554	18.095	2948580	229644	0.519122	0.180774
2009	17	SC Firm 17	1	US	0	SERV	4000	HCARE	1	0.124416	0.0244462	0.0155032	0.00248931	0.126256	5.64956	12.8657	0.209424	0.0270354	-2.77553	-0.167603	0.185004	0.0174008	0.0174008	0.124416	0.0244462	24.41	4344980	97841	0.875584	0.110887
2010	17	SC Firm 17	1	US	0	SERV	4000	HCARE	1	0.15049	0.0244462	0.00598557	0.000701964	0.16493	7.29543	13.2011	0.16031	0.027474	2.53192	0.0538123	0.0732641	0.127076	0.127076	0.15049	0.0244462	40.275	7369842	152301	0.84951	0.145374
2011	17	SC Firm 17	1	US	0	SERV	4000	HCARE	1	0.186597	0.0244462	0	0	0.187796	7.29543	13.5714	0.118912	0.0181059	1.60145	0.0774009	0.0712987	0.1487	0.1487	0.186597	0.0244462	71.5	13257673	260256	0.813403	0.186599
2012	17	SC Firm 17	1	US	0	SERV	4000	HCARE	1	0.238327	0.0330035	0.0696367	0.00809812	0.162216	7.22127	13.9414	0.0633729	0.0156196	2.32108	0.138748	0.230092	0.368841	0.368841	0.238327	0.0330035	93.74	18250334	622883	0.761673	0.188903
2013	17	SC Firm 17	1	US	0	SERV	4000	HCARE	1	0.251493	0.0308952	0.0435231	0.00429898	0.182185	7.29543	14.2546	0.0606171	0.0144678	2.21931	0.0637469	0.0722634	0.13601	0.13601	0.251493	0.0308952	132.884	26172301	834376	0.748507	0.247948
2014	17	SC Firm 17	1	US	0	SERV	4000	HCARE	1	0.214172	0.0244462	0.0171156	0.00155874	0.229136	7.29543	14.6192	0.0933488	0.0314157	2.3882	0.0156041	0.0385025	0.0541066	0.0541066	0.214172	0.0244462	185.03	36831332	899944	0.785828	0.200488
2004	18	SC Firm 18	1	US	0	SERV	4000	HCARE	1	0.344062	0.0643032	0.0211102	0.00281746	0.148403	5.35062	12.0601	0.166029	0.129833	3.78574	0.0439669	0.107067	0.151034	0.151034	0.344062	0.0643032	10.75	654417	44973	0.655938	0.329916
2005	18	SC Firm 18	1	US	0	SERV	4000	HCARE	1	0.342495	0.108081	0	0	0.0907536	3.16888	12.2411	0.185962	0.0406545	3.34522	0.0260291	0.0442333	0.0702625	0.0702625	0.342495	0.108081	6.47	401658	48672	0.657505	0.342495
2006	18	SC Firm 18	1	US	0	SERV	4000	HCARE	1	0.448686	0.0698114	0.120981	0.012533	-0.0340192	6.42712	12.2373	0.177516	0.12038	2.66663	0.127542	0.165488	0.29303	0.29303	0.448686	0.0698114	13.97	906080	68002	0.551314	0.372808
2007	18	SC Firm 18	1	US	0	SERV	4000	HCARE	1	0.276561	0.0510602	0	0	0.204003	5.41637	12.5579	0.113664	0.129833	1.77857	-0.0287079	0.187977	0.159269	0.159269	0.276561	0.0510602	16.68	1144949	61607	0.723439	0.276561
2008	18	SC Firm 18	1	US	0	SERV	4000	HCARE	1	0.217659	0.095736	0	0	0.123634	2.27353	12.6247	0.0965809	0.0467204	-0.291621	-0.00288536	-0.0395001	-0.0423855	-0.0423855	0.217659	0.095736	8.75	574289	60801	0.782341	0.217659
2009	18	SC Firm 18	1	US	0	SERV	4000	HCARE	1	0.231404	0.0582591	0	0	0.14549	3.97198	12.6518	0.0702933	0.0219487	-2.77553	0.0602494	0.241428	0.301678	0.301678	0.231404	0.0582591	17.82	1328802	82204	0.768596	0.231404
2010	18	SC Firm 18	1	US	0	SERV	4000	HCARE	1	0.207983	0.0623146	0	0	0.236513	3.33763	12.8665	0.0643347	0.069215	2.53192	0.0356269	0.0638609	0.0994878	0.0994878	0.207983	0.0623146	19.54	1492661	99196	0.792017	0.207983
2011	18	SC Firm 18	1	US	0	SERV	4000	HCARE	1	0.244096	0.0781689	0	0	0.179837	3.12268	13.081	0.0831172	0.0356956	1.60145	0.0913142	0.0790141	0.170328	0.170328	0.244096	0.0781689	23.725	1868961	158483	0.755904	0.244096
2012	18	SC Firm 18	1	US	0	SERV	4000	HCARE	1	0.231379	0.0725533	0	0	0.185101	3.18909	13.2358	0.104707	0.00372173	2.32108	0.0218323	0.0841571	0.105989	0.105989	0.231379	0.0725533	27.75	2236955	174995	0.768621	0.231379
2013	18	SC Firm 18	1	US	0	SERV	4000	HCARE	1	0.238151	0.0412638	0	0	0.213965	5.77144	13.4003	0.0910212	0.0227651	2.21931	0.0278581	0.0708252	0.0986833	0.0986833	0.238151	0.0412638	57.14	4604513	198177	0.761849	0.238151
2014	18	SC Firm 18	1	US	0	SERV	4000	HCARE	1	0.238084	0.0498414	0	0	0.214001	4.77682	13.5432	0.0912199	0.00154284	2.3882	0.0374991	0.0540467	0.0915458	0.0915458	0.238084	0.0498414	55.91	4484262	235226	0.761916	0.238084
2004	19	SC Firm 19	1	US	0	SERV	4000	HCARE	1	0.923092	0.26216	0.861847	0.24613	-0.0340192	3.76818	11.3336	0.280895	0.129833	3.78574	0.364544	0.034954	0.399498	0.399498	0.923092	0.26216	19.12	942176	334762	0.0769082	0.0801271
2005	19	SC Firm 19	1	US	0	SERV	4000	HCARE	1	0.923092	0.179332	0.861847	0.127322	0.051429	5.18807	12.0234	0.236642	0.129833	3.34522	0.228821	0.0529924	0.281814	0.281814	0.923092	0.179332	13.37	2031609	443947	0.0769082	0.3092
2006	19	SC Firm 19	1	US	0	SERV	4000	HCARE	1	0.642185	0.194712	0.437784	0.0949446	0.0405068	3.29813	12.3882	0.217359	0.00651296	2.66663	-0.138558	0.282789	0.144231	0.144231	0.642185	0.194712	15.59	1510227	365160	0.357815	0.363564
2007	19	SC Firm 19	1	US	0	SERV	4000	HCARE	1	0.534803	0.24889	0.344377	0.131492	0.0417515	2.14875	12.3914	0.171472	0.00271413	1.77857	-0.0215797	-0.0992304	-0.12081	-0.12081	0.534803	0.24889	10.65	1059251	350997	0.465197	0.290451
2008	19	SC Firm 19	1	US	0	SERV	4000	HCARE	1	0.232306	0.103213	0.148574	0.0622387	-0.000121804	2.25074	12.6972	0.187932	0.0293446	-0.291621	-0.250069	-0.00164347	-0.251713	-0.251713	0.232306	0.103213	9.41	1143417	131598	0.767694	0.0983431
2009	19	SC Firm 19	1	US	0	SERV	4000	HCARE	1	0.199736	0.0749457	0.110087	0.0386054	0.00182506	2.66508	12.0911	0.187946	0.0201315	-2.77553	-0.0554965	0.0336579	-0.0218386	-0.0218386	0.199736	0.0749457	12.28	1271131	102984	0.800264	0.100739
2010	19	SC Firm 19	1	US	0	SERV	4000	HCARE	1	0.133562	0.0480628	0	0	-0.0340192	2.77891	12.1369	0.210013	0.0348952	2.53192	-0.0940528	0.0551268	-0.038926	-0.038926	0.133562	0.0480628	17.36	1196883	60430	0.866438	0.133562
2011	19	SC Firm 19	1	US	0	SERV	4000	HCARE	1	0.381025	0.187115	0.333472	0.157601	0.00376459	2.03631	12.8738	0.211114	0.0469963	1.60145	0.338919	0.410394	0.749314	0.749314	0.381025	0.187115	18.52	2375698	546853	0.618975	0.0953898
2006	20	SC Firm 20	1	US	1	MAN	9000	TECH	1	0.0846403	0.0244462	0	0	0.22295	7.29543	16.1768	0.129659	0.00918038	2.66663	0.0311613	0.246216	0.277378	0.277378	0.0846403	0.0244462	230.463	142286939	1393090	0.91536	0.0775989
2007	20	SC Firm 20	1	US	1	MAN	9000	TECH	1	0.104442	0.0244462	0	0	0.238806	7.29543	16.6246	0.159429	0.00601884	1.77857	0.0494572	0.0555719	0.105029	0.105029	0.104442	0.0244462	346.075	216624898	2646127	0.895558	0.104442
2008	20	SC Firm 20	1	US	1	MAN	9000	TECH	1	0.110685	0.0349978	0	0	0.255729	3.16263	16.8972	0.164754	0.00571692	-0.291621	0.0273887	0.0420189	0.0694076	0.0694076	0.110685	0.0349978	153.974	96952970	3516198	0.889315	0.111079
2009	20	SC Firm 20	1	US	1	MAN	9000	TECH	1	0.110936	0.0244462	0	0	0.242444	4.97582	16.9789	0.11963	0.00248185	-2.77553	0.0241095	0.030432	0.0545415	0.0545415	0.110936	0.0244462	310.291	197012316	4492554	0.889064	0.110936
2010	20	SC Firm 20	1	US	1	MAN	9000	TECH	1	0.200688	0.0573465	0.0697099	0.0178325	0.203315	3.49957	17.1938	0.13412	0.0182517	2.53192	0.123031	0.0423649	0.165396	0.165396	0.200688	0.0573465	297.273	190843426	11610000	0.799312	0.140793
2011	20	SC Firm 20	1	US	1	MAN	9000	TECH	1	0.194863	0.0631363	0.067118	0.0196399	0.193995	3.08639	17.4506	0.13232	0.007609	1.60145	0.0348885	0.0338138	0.0687023	0.0687023	0.194863	0.0631363	323.263	209849527	14142000	0.805137	0.140891
2012	20	SC Firm 20	1	US	1	MAN	9000	TECH	1	0.215474	0.0796865	0.0699788	0.0231715	0.176614	2.70402	17.645	0.126378	0.0149877	2.32108	0.0647029	0.0471012	0.111804	0.111804	0.215474	0.0796865	354.033	233420372	20211000	0.784526	0.1764
2013	20	SC Firm 20	1	US	1	MAN	9000	TECH	1	0.195312	0.0544274	0.0555021	0.0137442	0.173053	3.58848	17.8322	0.148972	0.00609618	2.21931	0.0130995	0.0247836	0.0378832	0.0378832	0.195312	0.0544274	560.899	376370608	21664000	0.804688	0.165579
2014	20	SC Firm 20	1	US	1	MAN	9000	TECH	1	0.188574	0.0637945	0.0471513	0.0143018	0.16466	2.95597	18.0052	0.183115	0.00671031	2.3882	0.0224725	0.0212458	0.0437183	0.0437183	0.188574	0.0637945	530.66	360940074	24595000	0.811426	0.163533
2004	21	SC Firm 21	1	US	1	MAN	9000	TECH	1	0.279647	0.0600844	0	0	0.194032	4.65423	13.8317	0.0902345	0.0330801	3.78574	0.0414016	0.0291556	0.0705571	0.0705571	0.279647	0.0600844	20.7	7736811	494578	0.720353	0.279647
2005	21	SC Firm 21	1	US	1	MAN	9000	TECH	1	0.310833	0.0785967	0.00306381	0.000580891	0.192355	3.95478	13.9322	0.0908242	0.000405881	3.34522	0.040231	-0.0170291	0.0232019	0.0232019	0.310833	0.0785967	18.53	6660034	568108	0.689167	0.308715
2006	21	SC Firm 21	1	US	1	MAN	9000	TECH	1	0.279904	0.0810359	0	0	0.148122	3.45408	14.0667	0.0798667	0.0293134	2.66663	0.0255192	0.0544433	0.0799625	0.0799625	0.279904	0.0810359	19.68	7088756	625099	0.720096	0.279904
2007	21	SC Firm 21	1	US	1	MAN	9000	TECH	1	0.513283	0.130299	0.224931	0.0395964	0.175869	3.93926	14.0494	0.0959649	0.0166126	1.77857	0.160103	-0.107739	0.0523634	0.0523634	0.513283	0.130299	19.32	6063707	908468	0.486717	0.372033
2008	21	SC Firm 21	1	US	1	MAN	9000	TECH	1	0.574512	0.180861	0.384652	0.0927374	0.240672	3.17654	14.1283	0.102272	0.0469677	-0.291621	0.0912609	-0.023257	0.0680039	0.0680039	0.574512	0.180861	16.71	4891568	1080030	0.425488	0.308542
2009	21	SC Firm 21	1	US	1	MAN	9000	TECH	1	0.526722	0.152418	0.315391	0.0692812	0.140323	3.45576	13.994	0.0761005	0.0686338	-2.77553	0.0557576	0.0439537	0.0997113	0.0997113	0.526722	0.152418	22.63	6716969	1207895	0.473278	0.308689
2010	21	SC Firm 21	1	US	1	MAN	9000	TECH	1	0.381981	0.112169	0.177076	0.0421315	0.236456	3.40541	14.4856	0.0436601	0.0717466	2.53192	0.0607181	0.142802	0.20352	0.20352	0.381981	0.112169	35.58	11367597	1436185	0.618019	0.248996
2011	21	SC Firm 21	1	US	1	MAN	9000	TECH	1	0.300862	0.0973342	0.143107	0.0401664	0.206215	3.09102	14.5404	0.0401005	0.0214769	1.60145	-0.0345175	0.0330743	-0.00144316	-0.00144316	0.300862	0.0973342	37.1	11948203	1288372	0.699138	0.184102
2012	21	SC Firm 21	1	US	1	MAN	9000	TECH	1	0.284334	0.107549	0.130431	0.0435168	0.133391	2.64376	14.3938	0.0442584	0.0518187	2.32108	0.00773086	0.0166442	0.0243751	0.0243751	0.284334	0.107549	34.39	10989806	1324381	0.715666	0.176988
2013	21	SC Firm 21	1	US	1	MAN	9000	TECH	1	0.414231	0.193809	0.298083	0.126155	0.0855172	2.13731	14.3651	0.0340484	0.0338488	2.21931	0.19334	0.0101265	0.203467	0.203467	0.414231	0.193809	32.511	10330988	2483581	0.585769	0.165473
2014	21	SC Firm 21	1	US	1	MAN	9000	TECH	1	0.420921	0.176134	0.312385	0.117869	0.105105	2.38978	14.4741	0.0343377	0.0120842	2.3882	-0.0167743	-0.00246307	-0.0192373	-0.0192373	0.420921	0.176134	36.94	11171764	2388400	0.579079	0.157844
2004	22	SC Firm 22	1	US	1	MAN	9000	TECH	1	0.481571	0.238846	0.241058	0.0968997	0.135385	2.01624	14.3886	0.0632431	0.017964	3.78574	0.0482149	-0.134983	-0.0867678	-0.0867678	0.481571	0.238846	26.25	4395121	1379164	0.518429	0.331058
2005	22	SC Firm 22	1	US	1	MAN	9000	TECH	1	0.466966	0.212225	0.211819	0.076334	0.137593	2.20033	14.5278	0.0567725	0.004387	3.34522	0.0363098	-0.0207131	0.0155967	0.0155967	0.466966	0.212225	27.5	5551047	1495445	0.533034	0.339508
2006	22	SC Firm 22	1	US	1	MAN	9000	TECH	1	0.423769	0.170173	0.165223	0.0523047	0.118963	2.49022	14.7238	0.0555891	0.013666	2.66663	0.046401	0.0650659	0.111467	0.111467	0.423769	0.170173	38.75	8189003	1679324	0.576231	0.342357
2007	22	SC Firm 22	1	US	1	MAN	9000	TECH	1	0.373301	0.172142	0.142367	0.0547739	0.120835	2.16856	14.858	0.0653202	0.00458989	1.77857	-0.0131635	0.0172104	0.00404685	0.00404685	0.373301	0.172142	34.47	7801049	1622124	0.626699	0.297571
2008	22	SC Firm 22	1	US	1	MAN	9000	TECH	1	0.329177	0.212582	0.128189	0.0748416	0.133383	1.54847	14.9667	0.0692458	0.00551439	-0.291621	-0.0250706	-0.00663738	-0.031708	-0.031708	0.329177	0.212582	18.29	5583220	1507324	0.670823	0.288752
2009	22	SC Firm 22	1	US	1	MAN	9000	TECH	1	0.194587	0.132539	0.0002925	0.000184999	0.141827	1.46815	14.8672	0.06461	0.00327036	-2.77553	-0.153652	0.0199761	-0.133676	-0.133676	0.194587	0.132539	28.53	5512530	842254	0.805413	0.257448
2010	22	SC Firm 22	1	US	1	MAN	9000	TECH	1	0.269157	0.189963	0.0537186	0.034887	0.131208	1.4169	14.9088	0.0535769	0.00441271	2.53192	0.0944378	-0.0636779	0.0307598	0.0307598	0.269157	0.189963	27.47	5532789	1297501	0.730843	0.2886
2011	22	SC Firm 22	1	US	1	MAN	9000	TECH	1	0.281075	0.215735	0.0697672	0.0501239	0.127448	1.30287	14.9717	0.0557313	0.00196824	1.60145	0.00123475	-0.115694	-0.114459	-0.114459	0.281075	0.215735	28.53	4737638	1303226	0.718925	0.294026
2012	22	SC Firm 22	1	US	1	MAN	9000	TECH	1	0.282059	0.196448	0.0565771	0.0359754	0.129614	1.43579	14.9932	0.0598264	0.00568604	2.32108	0.00150692	-0.0793503	-0.0778434	-0.0778434	0.282059	0.196448	33.99	5359361	1310226	0.717941	0.303973
2013	22	SC Firm 22	1	US	1	MAN	9000	TECH	1	0.271034	0.185432	0.05276	0.0329779	0.126799	1.46163	15.0232	0.0559388	0.00177328	2.21931	0.00504262	-0.0148175	-0.00977483	-0.00977483	0.271034	0.185432	41.24	5864672	1335065	0.728966	0.294577
2014	22	SC Firm 22	1	US	1	MAN	9000	TECH	1	0.3451	0.199291	0.0582389	0.02838	0.127106	1.73164	15.0863	0.0557262	0.00153679	2.3882	0.0876281	0.410394	0.498022	0.498022	0.3451	0.199291	46.655	7189580	1789441	0.6549	0.304601
2004	23	SC Firm 23	1	US	0	SERV	5000	CSERV	1	0.274989	0.0866472	0	0	0.323721	3.17366	14.4474	0.25572	0.0919243	3.78574	0.0529774	0.0915077	0.144485	0.144485	0.274989	0.0866472	15.32	3852123	365440	0.725011	0.274989
2005	23	SC Firm 23	1	US	0	SERV	5000	CSERV	1	0.280321	0.0592768	0	0	0.333859	4.72902	14.6579	0.215189	0.00900879	3.34522	0.0527245	-0.0373861	0.0153383	0.0153383	0.280321	0.0592768	31.21	7143048	450097	0.719679	0.280321
2006	23	SC Firm 23	1	US	0	SERV	5000	CSERV	1	0.284026	0.104356	0	0	0.340896	2.72171	14.8431	0.243309	0.00760333	2.66663	0.0566536	-0.0311837	0.0254698	0.0254698	0.284026	0.104356	20.77	4825528	562246	0.715974	0.284026
2007	23	SC Firm 23	1	US	0	SERV	5000	CSERV	1	0.282284	0.221818	0	0	0.379374	1.27259	14.9324	0.334944	0.0173098	1.77857	-0.0187559	-0.201473	-0.220229	-0.220229	0.282284	0.221818	9.36	1849582	527216	0.717716	0.282284
2008	23	SC Firm 23	1	US	0	SERV	5000	CSERV	1	0.282452	0.144393	0.050538	0.0223111	0.294254	1.95613	14.8969	0.376966	0.0633525	-0.291621	0.0139682	-0.0121252	0.00184297	0.00184297	0.282452	0.144393	16.98	3286560	554645	0.717548	0.244259
2009	23	SC Firm 23	1	US	0	SERV	5000	CSERV	1	0.261736	0.165102	0.0186507	0.0104896	0.236801	1.5853	14.894	0.333533	0.041608	-2.77553	0.00233192	0.0465814	0.0489134	0.0489134	0.261736	0.165102	14.63	2829969	559631	0.738264	0.247705
2010	23	SC Firm 23	1	US	0	SERV	5000	CSERV	1	0.281344	0.163206	0	0	0.255965	1.72386	14.8957	0.342085	0.00575939	2.53192	-0.0163319	-0.0932586	-0.109591	-0.109591	0.281344	0.163206	15.29	2711934	528927	0.718656	0.281344
2011	23	SC Firm 23	1	US	0	SERV	5000	CSERV	1	0.273708	0.120732	0	0	0.222755	2.26708	14.9534	0.298422	0.0211288	1.60145	0.00257535	0.00320125	0.0057766	0.0057766	0.273708	0.120732	20.51	3888675	533951	0.726292	0.273708
2012	23	SC Firm 23	1	US	0	SERV	5000	CSERV	1	0.304584	0.169897	0	0	0.322041	1.79275	15.0613	0.290215	0.0694321	2.32108	0.000521055	0.0129506	0.0134717	0.0134717	0.304584	0.169897	14.4	2613306	534866	0.695416	0.304584
2013	23	SC Firm 23	1	US	0	SERV	5000	CSERV	1	0.31165	0.162009	0	0	0.188628	1.92366	15.0112	0.373627	0.098584	2.21931	-0.004061	-0.042382	-0.046443	-0.046443	0.31165	0.162009	13.88	2731005	527986	0.68835	0.31165
2004	24	SC Firm 24	1	US	1	MAN	2000	IND	1	0.500812	0.225011	0.388321	0.155208	0.162694	2.22573	14.0244	0.14612	0.00410067	3.78574	0.0525982	0.0225951	0.0751933	0.0751933	0.500812	0.225011	10.5689	2449984	711329	0.499188	0.218713
2005	24	SC Firm 24	1	US	1	MAN	2000	IND	1	0.516756	0.234837	0.423244	0.173974	0.153272	2.20049	14.1763	0.128299	0.00245196	3.34522	0.117269	0.0296394	0.146908	0.146908	0.516756	0.234837	12.6045	2998065	920138	0.483244	0.190745
2006	24	SC Firm 24	1	US	1	MAN	2000	IND	1	0.515808	0.245557	0.397913	0.168	0.166562	2.10056	14.414	0.121081	0.00981419	2.66663	0.083996	0.00395659	0.0879526	0.0879526	0.515808	0.245557	14.1511	3376912	1099123	0.484192	0.226352
2007	24	SC Firm 24	1	US	1	MAN	2000	IND	1	0.505673	0.216348	0.399498	0.152216	0.159983	2.33731	14.5748	0.106751	0.00298078	1.77857	0.105365	0.0469061	0.152272	0.152272	0.505673	0.216348	20.8178	5029127	1388425	0.494327	0.219265
2008	24	SC Firm 24	1	US	1	MAN	2000	IND	1	0.53111	0.334807	0.436914	0.256389	0.175418	1.58632	14.7442	0.10077	0.0098252	-0.291621	0.0767144	-0.0477562	0.0289582	0.0289582	0.53111	0.334807	13.4267	3224235	1622829	0.46889	0.214721
2009	24	SC Firm 24	1	US	1	MAN	2000	IND	1	0.453678	0.263061	0.370039	0.201596	0.132947	1.72461	14.5567	0.0955175	0.0296412	-2.77553	-0.0462642	0.0494955	0.00323133	0.00323133	0.453678	0.263061	16.9956	4125484	1472654	0.546322	0.19634
2010	24	SC Firm 24	1	US	1	MAN	2000	IND	1	0.453596	0.215451	0.35897	0.156294	0.145343	2.10533	14.7201	0.0833027	0.00953659	2.53192	0.0679751	0.0151931	0.0831681	0.0831681	0.453596	0.215451	26.1667	6307843	1732245	0.546404	0.229175
2011	24	SC Firm 24	1	US	1	MAN	2000	IND	1	0.43468	0.217585	0.341065	0.157684	0.167259	1.99775	14.9108	0.0753165	0.0148285	1.60145	0.0336503	0.00216461	0.0358149	0.0358149	0.43468	0.217585	28.0667	6751644	1877597	0.56532	0.232148
2012	24	SC Firm 24	1	US	1	MAN	2000	IND	1	0.418503	0.191938	0.3251	0.137173	0.164035	2.1804	15.0197	0.073888	0.00248492	2.32108	0.0567346	0.0328139	0.0895486	0.0895486	0.418503	0.191938	37.57	9144360	2172053	0.581497	0.231429
2013	24	SC Firm 24	1	US	1	MAN	2000	IND	1	0.371429	0.144702	0.276935	0.0988205	0.158869	2.56685	15.0948	0.0685262	0.00356621	2.21931	0.00190085	0.0371012	0.039002	0.039002	0.371429	0.144702	52.67	12904490	2183226	0.628571	0.225713
2014	24	SC Firm 24	1	US	1	MAN	2000	IND	1	0.399164	0.167907	0.307616	0.118902	0.161535	2.37729	15.2073	0.0698409	0.000903202	2.3882	0.0591486	-0.0530509	0.00609768	0.00609768	0.399164	0.167907	52.63	12701476	2563017	0.600836	0.228529
2004	25	SC Firm 25	1	US	1	MAN	2000	IND	1	0.621228	0.200887	0.475693	0.122085	0.241425	3.09242	14.2411	0.151336	0.0273479	3.78574	-0.0294495	0.00038111	-0.0290684	-0.0290684	0.621228	0.200887	9.185	3229135	811766	0.378772	0.287787
2005	25	SC Firm 25	1	US	1	MAN	2000	IND	1	0.643353	0.242729	0.531208	0.1676	0.204378	2.6505	14.4078	0.131376	0.02408	3.34522	0.223301	-0.000665445	0.222636	0.222636	0.643353	0.242729	11.065	3878896	1243305	0.356647	0.239221
2006	25	SC Firm 25	1	US	1	MAN	2000	IND	1	0.588688	0.190385	0.429715	0.110164	0.236159	3.09208	14.7203	0.124872	0.0178158	2.66663	0.0223641	0.0257539	0.0481179	0.0481179	0.588688	0.190385	15.52	5495948	1292403	0.411312	0.27876
2007	25	SC Firm 25	1	US	1	MAN	2000	IND	1	0.527264	0.14385	0.363581	0.0792415	0.237395	3.66539	14.8632	0.118171	0.0026644	1.77857	0.0442555	0.0272153	0.0714709	0.0714709	0.527264	0.14385	23.185	8396779	1410819	0.472736	0.257194
2008	25	SC Firm 25	1	US	1	MAN	2000	IND	1	0.549314	0.286052	0.368212	0.160781	0.241657	1.92033	14.99	0.115062	0.00320898	-0.291621	0.0781238	0.0163809	0.0945047	0.0945047	0.549314	0.286052	11.99	4105046	1644734	0.450686	0.28665
2009	25	SC Firm 25	1	US	1	MAN	2000	IND	1	0.457603	0.155523	0.301437	0.086086	0.18248	2.94234	14.8523	0.103404	0.0419192	-2.77553	-0.0533138	0.0276859	-0.0256279	-0.0256279	0.457603	0.155523	23.09	7998834	1473107	0.542397	0.223553
2010	25	SC Firm 25	1	US	1	MAN	2000	IND	1	0.422077	0.154645	0.256338	0.0794782	0.200008	2.72932	15.0836	0.0913867	0.0159262	2.53192	0.0552547	0.0221178	0.0773725	0.0773725	0.422077	0.154645	26.39	9265565	1695002	0.577923	0.222869
2011	25	SC Firm 25	1	US	1	MAN	2000	IND	1	0.511438	0.23492	0.388044	0.156826	0.197242	2.17707	15.1866	0.0855977	0.0028464	1.60145	0.130129	0.00202419	0.132153	0.132153	0.511438	0.23492	22.695	7404129	2273456	0.488562	0.201638
2012	25	SC Firm 25	1	US	1	MAN	2000	IND	1	0.534086	0.212176	0.412551	0.141626	0.182558	2.51719	15.2723	0.0800381	0.00789427	2.32108	0.0981788	0.0288693	0.127048	0.127048	0.534086	0.212176	32.35	10342796	2785504	0.465914	0.206886
2013	25	SC Firm 25	1	US	1	MAN	2000	IND	1	0.536398	0.189955	0.427226	0.131321	0.168494	2.82381	15.3448	0.0863201	0.00908014	2.21931	0.0847945	0.0349048	0.119699	0.119699	0.536398	0.189955	44.59	14108822	3308519	0.463602	0.190603
2014	25	SC Firm 25	1	US	1	MAN	2000	IND	1	0.583819	0.196522	0.477425	0.137406	0.174179	2.97076	15.4918	0.084556	0.00265138	2.3882	0.110219	0.00268641	0.112906	0.112906	0.583819	0.196522	53.81	16674898	4078500	0.416181	0.203596
2004	26	SC Firm 26	1	US	1	MAN	9000	TECH	1	0.193295	0.0569038	0	0	0.180374	3.39687	14.7839	0.141381	0.0384825	3.78574	0.0264101	0.00210045	0.0285105	0.0285105	0.193295	0.0569038	36.92	15131336	912983	0.806705	0.195563
2005	26	SC Firm 26	1	US	1	MAN	9000	TECH	1	0.194182	0.0655067	0	0	0.145227	2.9643	14.5739	0.130892	0.0260034	3.34522	-0.00502006	-0.0900768	-0.0950969	-0.0950969	0.194182	0.0655067	35.87	12696042	889975	0.805818	0.19456
2006	26	SC Firm 26	1	US	1	MAN	9000	TECH	1	0.137363	0.0489225	0	0	0.181062	2.80776	14.6265	0.139193	0.0188052	2.66663	-0.085865	-0.0912018	-0.177067	-0.177067	0.137363	0.0489225	32.87	10646460	547644	0.862637	0.138219
2007	26	SC Firm 26	1	US	1	MAN	9000	TECH	1	0.209921	0.0588138	0	0	0.257158	3.56924	14.7176	0.187171	0.0475032	1.77857	0.0255872	0.0113058	0.036893	0.036893	0.209921	0.0588138	31.7	9980353	623662	0.790079	0.213336
2008	26	SC Firm 26	1	US	1	MAN	9000	TECH	1	0.212365	0.0954609	0	0	0.252859	2.22463	14.7644	0.183578	0.00130906	-0.291621	0.0105976	-0.0256008	-0.0150033	-0.0150033	0.212365	0.0954609	19.02	6219892	656419	0.787635	0.216995
2009	26	SC Firm 26	1	US	1	MAN	9000	TECH	1	0.248979	0.100839	0.13045	0.0482982	0.141967	2.46908	14.5161	0.141424	0.0726572	-2.77553	0.0541621	0.0241535	0.0783156	0.0783156	0.248979	0.100839	31.58	7480417	838913	0.751021	0.13671
2010	26	SC Firm 26	1	US	1	MAN	9000	TECH	1	0.26042	0.100806	0.111221	0.0383152	0.239658	2.58337	14.8313	0.10919	0.0786857	2.53192	0.0666233	0.0482585	0.114882	0.114882	0.26042	0.100806	37.67	10055646	1127314	0.73958	0.168285
2004	27	SC Firm 27	1	US	1	MAN	9000	TECH	1	0.267799	0.0599014	0	0	0.221068	4.47067	11.8096	0.0231633	0.0169364	3.78574	0.0446158	0.0577018	0.102318	0.102318	0.267799	0.0599014	16.03	1007201	64177	0.732201	0.267799
2005	27	SC Firm 27	1	US	1	MAN	9000	TECH	1	0.263599	0.055591	0	0	0.217473	4.74177	11.9706	0.0208243	0.000522288	3.34522	0.0535336	0.0183464	0.07188	0.07188	0.263599	0.055591	21.345	1368120	80532	0.736401	0.263599
2006	27	SC Firm 27	1	US	1	MAN	9000	TECH	1	0.328417	0.150122	0.169035	0.068448	0.101093	2.18767	12.4823	0.0282819	0.0858529	2.66663	0.239205	0.406673	0.645877	0.645877	0.328417	0.150122	21.745	1678339	296461	0.671583	0.270947
2007	27	SC Firm 27	1	US	1	MAN	9000	TECH	1	0.274026	0.0757218	0.078743	0.0182136	0.170402	3.61885	12.8619	0.0300033	0.0421456	1.77857	-0.0318274	0.017161	-0.0146664	-0.0146664	0.274026	0.0757218	41.46	3242109	265611	0.725974	0.276424
2008	27	SC Firm 27	1	US	1	MAN	9000	TECH	1	0.297176	0.181855	0.175755	0.100795	0.116884	1.63414	13.0781	0.0197435	0.0281095	-0.291621	0.15472	0.265524	0.420244	0.420244	0.297176	0.181855	27.89	2492781	554088	0.702824	0.215708
2009	27	SC Firm 27	1	US	1	MAN	9000	TECH	1	0.260516	0.113754	0.137006	0.0546788	0.130266	2.29017	13.1556	0.0182957	0.00456571	-2.77553	-0.0280442	-0.00357935	-0.0316236	-0.0316236	0.260516	0.113754	43.46	3897303	500238	0.739484	0.199005
2010	27	SC Firm 27	1	US	1	MAN	9000	TECH	1	0.245393	0.0985876	0.0904091	0.0323476	0.131144	2.48909	13.2712	0.0173593	0.00396314	2.53192	0.0101948	0.0149887	0.0251834	0.0251834	0.245393	0.0985876	52.07	4772060	521921	0.754607	0.205664
2011	27	SC Firm 27	1	US	1	MAN	9000	TECH	1	0.241938	0.100412	0.0643113	0.0234738	0.135013	2.40945	13.4465	0.0186394	0.00379379	1.60145	0.0287763	0.0287776	0.0575539	0.0575539	0.241938	0.100412	57.28	5307092	592379	0.758062	0.231338
2012	27	SC Firm 27	1	US	1	MAN	9000	TECH	1	0.220258	0.0842779	0.0254757	0.00844539	0.145959	2.61347	13.5899	0.0200401	0.00335049	2.32108	-0.00693215	-0.0101484	-0.0170805	-0.0170805	0.220258	0.0842779	67.34	6240106	574304	0.779742	0.235473
2013	27	SC Firm 27	1	US	1	MAN	9000	TECH	1	0.190729	0.0605922	0	0	0.147872	3.14775	13.6662	0.028899	0.00355744	2.21931	-0.0202275	-0.0276578	-0.0478853	-0.0478853	0.190729	0.0605922	87.2	8050137	519237	0.809271	0.215303
2014	27	SC Firm 27	1	US	1	MAN	9000	TECH	1	0.187164	0.0652115	0	0	0.154786	2.87011	13.7494	0.0233023	0.00496336	2.3882	-9.01192e-06	-0.0731566	-0.0731656	-0.0731656	0.187164	0.0652115	82	7442759	519212	0.812836	0.200642
2004	28	SC Firm 28	1	US	1	MAN	1	OILGAS	1	0.332297	0.237273	0.200039	0.135179	0.262569	1.40048	15.4893	0.885766	0.0127912	3.78574	0.0622695	0.0354383	0.0977078	0.0977078	0.332297	0.237273	50.57	16559551	5151422	0.667703	0.303801
2005	28	SC Firm 28	1	US	1	MAN	1	OILGAS	1	0.319117	0.213764	0.143151	0.0883531	0.29756	1.49285	15.8416	0.871291	0.0285447	3.34522	0.051813	0.0140756	0.0658886	0.0658886	0.319117	0.213764	68.52	22619891	6149952	0.680883	0.339271
2006	28	SC Firm 28	1	US	1	MAN	1	OILGAS	1	0.308461	0.254213	0.185243	0.148026	0.245423	1.2134	15.9329	0.878151	0.0377594	2.66663	0.055462	0.0537467	0.109209	0.109209	0.308461	0.254213	66.51	21997318	7498133	0.691539	0.300113
2007	28	SC Firm 28	1	US	1	MAN	1	OILGAS	1	0.325888	0.206752	0.179632	0.105589	0.252737	1.57623	16.1181	0.881156	0.000179613	1.77857	0.0640328	-0.00230822	0.0617246	0.0617246	0.325888	0.206752	107.54	35802970	9331689	0.674112	0.315352
2008	28	SC Firm 28	1	US	1	MAN	1	OILGAS	1	0.325874	0.276028	0.200089	0.16478	0.306477	1.18058	16.3324	0.820877	0.0942129	-0.291621	0.0061473	-0.00342004	0.00272726	0.00272726	0.325874	0.276028	74.53	24945936	9511107	0.674126	0.265746
2009	28	SC Firm 28	1	US	1	MAN	1	OILGAS	1	0.342096	0.2174	0.214632	0.1274	0.204937	1.57358	15.969	0.812489	0.0123963	-2.77553	0.00465178	-0.0226572	-0.0180054	-0.0180054	0.342096	0.2174	103.17	34710205	9642221	0.657904	0.260394
2010	28	SC Firm 28	1	US	1	MAN	1	OILGAS	1	0.340794	0.245051	0.221421	0.151507	0.20274	1.39071	16.3081	0.878549	0.0790312	2.53192	0.118751	0.168015	0.286767	0.286767	0.340794	0.245051	119.23	45592567	14799000	0.659206	0.251169
2011	28	SC Firm 28	1	US	1	MAN	1	OILGAS	1	0.30472	0.313122	0.166244	0.171771	0.240975	0.973168	16.6421	0.873144	0.020127	1.60145	0.0204031	0.0631496	0.0835527	0.0835527	0.30472	0.313122	90.58	34793376	15861000	0.69528	0.304355
2004	29	SC Firm 29	1	US	1	MAN	9000	TECH	1	0.355404	0.16388	0	0	0.0603727	2.16869	15.9292	0.0878261	0.0269201	3.78574	0.0626087	0.0565217	0.11913	0.11913	0.355404	0.16388	4.6	14596932	2861000	0.644596	0.369441
2005	29	SC Firm 29	1	US	1	MAN	9000	TECH	1	0.328239	0.0784183	0	0	0.158215	4.18574	16.4496	0.0709448	0.0713697	3.34522	0.079802	0.112192	0.191994	0.191994	0.328239	0.0784183	10.27	44423030	3780000	0.671761	0.354984
2006	29	SC Firm 29	1	US	1	MAN	9000	TECH	1	0.397559	0.0941136	0	0	0.155652	4.22424	16.7764	0.0744551	0.000179613	2.66663	0.177855	0.0550421	0.232897	0.232897	0.397559	0.0941136	12.12	65838112	6840000	0.602441	0.419704
2007	29	SC Firm 29	1	US	1	MAN	9000	TECH	1	0.402257	0.07077	0	0	0.185979	5.684	17.0174	0.0722768	0.0221267	1.77857	0.132402	0.0509725	0.183375	0.183375	0.402257	0.07077	28.2971	133876327	10196000	0.597743	0.426678
2008	29	SC Firm 29	1	US	1	MAN	9000	TECH	1	0.355948	0.101543	0	0	0.242183	3.5054	17.4396	0.0678721	0.0398422	-0.291621	0.0740649	0.0585275	0.132592	0.132592	0.355948	0.101543	12.1928	113918923	12875000	0.644052	0.383567
2009	29	SC Firm 29	1	US	1	MAN	9000	TECH	1	0.287257	0.0767683	0	0	0.261026	3.74187	17.5745	0.0621882	0.0119788	-2.77553	0.0162102	0.0491779	0.0653881	0.0653881	0.287257	0.0767683	30.1045	164097529	13645000	0.712743	0.333909
2010	29	SC Firm 29	1	US	1	MAN	9000	TECH	1	0.307144	0.0793953	0	0	0.256295	3.86854	17.9934	0.0634186	0.00184981	2.53192	0.125653	0.0587766	0.18443	0.18443	0.307144	0.0793953	46.08	267756365	23092000	0.692856	0.364338
2011	29	SC Firm 29	1	US	1	MAN	9000	TECH	1	0.27152	0.077576	0	0	0.305953	3.50004	18.3899	0.0668294	0.0324051	1.60145	0.0730852	0.060247	0.133332	0.133332	0.27152	0.077576	57.8571	375706673	31597000	0.72848	0.341632
2012	29	SC Firm 29	1	US	1	MAN	9000	TECH	1	0.249949	0.0656275	0	0	0.332368	3.8086	18.3899	0.0877635	0.0165398	2.32108	0.0704857	0.0501806	0.120666	0.120666	0.249949	0.0656275	76.0246	626550325	44007000	0.750051	0.328596
2013	29	SC Firm 29	1	US	1	MAN	9000	TECH	1	0.323488	0.133641	0.108027	0.0376007	0.269367	2.42057	18.3899	0.0801787	0.0544791	2.21931	0.110894	0.0242222	0.135116	0.135116	0.323488	0.133641	80.1456	434095103	66962000	0.676512	0.321213
2014	29	SC Firm 29	1	US	1	MAN	9000	TECH	1	0.431476	0.144755	0.21122	0.0563538	0.26097	2.98073	18.3899	0.0889583	0.00724569	2.3882	0.142646	0.0382679	0.180914	0.180914	0.431476	0.144755	110.38	591015721	100033000	0.568524	0.366621
2004	30	SC Firm 30	1	US	1	MAN	2000	IND	1	0.431113	0.304577	0.186357	0.116898	0.111695	1.41545	14.2322	0.129054	0.0146298	3.78574	0.0197004	0.0158853	0.0355857	0.0355857	0.431113	0.304577	18.2667	587491	257306	0.568887	0.300815
2005	30	SC Firm 30	1	US	1	MAN	2000	IND	1	0.430159	0.234576	0.163689	0.0736123	0.148939	1.83377	14.3561	0.103512	0.0291738	3.34522	0.0573438	0.0161598	0.0735036	0.0735036	0.430159	0.234576	22.46	968732	296883	0.569841	0.318626
2006	30	SC Firm 30	1	US	1	MAN	2000	IND	1	0.432273	0.227702	0.155162	0.0663956	0.177169	1.89842	14.4578	0.096889	0.0217374	2.66663	0.025957	-0.0448779	-0.018921	-0.018921	0.432273	0.227702	26.31	1071269	315849	0.567727	0.328004
2007	30	SC Firm 30	1	US	1	MAN	2000	IND	1	0.41986	0.204207	0.143234	0.0559594	0.192373	2.05605	14.5157	0.0872018	0.0109439	1.77857	0.0135547	-0.0371651	-0.0236104	-0.0236104	0.41986	0.204207	29.02	1271922	326386	0.58014	0.322872
2008	30	SC Firm 30	1	US	1	MAN	2000	IND	1	0.371441	0.224967	0.0474316	0.0238743	0.2094	1.65109	14.5524	0.0813713	0.0124784	-0.291621	-0.0371696	-0.0234122	-0.0605818	-0.0605818	0.371441	0.224967	18.92	1022149	296696	0.628559	0.340143
2009	30	SC Firm 30	1	US	1	MAN	2000	IND	1	0.372193	0.26558	0.136031	0.0876237	0.162467	1.40144	14.4695	0.0775149	0.0399679	-2.77553	0.00559724	-0.0134124	-0.00781513	-0.00781513	0.372193	0.26558	22.07	832995	301226	0.627807	0.273345
2010	30	SC Firm 30	1	US	1	MAN	2000	IND	1	0.377424	0.238734	0.11904	0.0653333	0.147687	1.58094	14.4538	0.0655857	0.00803263	2.53192	0.0395448	0.00688824	0.0464331	0.0464331	0.377424	0.238734	32.48	1072960	336481	0.622576	0.293298
2011	30	SC Firm 30	1	US	1	MAN	2000	IND	1	0.307529	0.156452	0	0	0.1895	1.96564	14.6098	0.0754308	0.0292317	1.60145	-0.0602373	0.0125397	-0.0476976	-0.0476976	0.307529	0.156452	35.17	1517057	281368	0.692471	0.307529
2012	30	SC Firm 30	1	US	1	MAN	2000	IND	1	0.301452	0.157934	0	0	0.198607	1.90872	14.6807	0.0863692	0.00723565	2.32108	0.00902531	-0.0378005	-0.0287752	-0.0287752	0.301452	0.157934	42.01	1546484	290052	0.698548	0.301452
2013	30	SC Firm 30	1	US	1	MAN	2000	IND	1	0.282506	0.127974	0	0	0.190925	2.20752	14.7166	0.0786271	0.00593682	2.21931	0.00853778	0.00612257	0.0146603	0.0146603	0.282506	0.127974	49.09	2038028	299091	0.717494	0.282506
2014	30	SC Firm 30	1	US	1	MAN	2000	IND	1	0.400145	0.20204	0.175807	0.0748999	0.144178	1.98052	14.7156	0.0776483	0.030707	2.3882	0.175967	-0.0237758	0.152191	0.152191	0.400145	0.20204	45.59	2108491	533861	0.599855	0.272191
2004	31	SC Firm 31	1	US	1	MAN	9000	TECH	1	0.234128	0.094748	0.0469525	0.0165876	0.191285	2.47106	15.8966	0.111261	0.110495	3.78574	0.0607039	-0.0251044	0.0355995	0.0355995	0.234128	0.094748	17.1	27052250	2831418	0.765872	0.196397
2005	31	SC Firm 31	1	US	1	MAN	9000	TECH	1	0.2077	0.0817648	0.044411	0.0155411	0.155149	2.54022	15.7603	0.113143	0.0236146	3.34522	-0.0435534	-0.123976	-0.167529	-0.167529	0.2077	0.0817648	17.94	26285514	2340608	0.7923	0.170878
2006	31	SC Firm 31	1	US	1	MAN	9000	TECH	1	0.298437	0.105377	0.0576942	0.0166708	0.264022	2.8321	16.0311	0.108038	0.0756678	2.66663	0.0515597	-0.208	-0.156441	-0.156441	0.298437	0.105377	18.45	24021260	2829437	0.701563	0.255483
2007	31	SC Firm 31	1	US	1	MAN	9000	TECH	1	0.266441	0.0980442	0.0255215	0.00777703	0.250065	2.71756	16.0912	0.0985945	0.00749638	1.77857	0.00107219	-0.0207253	-0.0196531	-0.0196531	0.266441	0.0980442	17.76	26134509	2840869	0.733559	0.247229
2008	31	SC Firm 31	1	US	1	MAN	9000	TECH	1	0.314125	0.1856	0.0261422	0.0131815	0.153875	1.69249	15.911	0.0994156	0.0707831	-0.291621	0.0560125	-0.0918062	-0.0357937	-0.0357937	0.314125	0.1856	10.13	15170675	3457360	0.685875	0.295713
2009	31	SC Firm 31	1	US	1	MAN	9000	TECH	1	0.25899	0.124953	0.02767	0.011493	0.0155703	2.0727	15.4277	0.113892	0.0987409	-2.77553	-0.10212	0.0222403	-0.07988	-0.07988	0.25899	0.124953	13.94	17364875	2479635	0.74101	0.237903
2010	31	SC Firm 31	1	US	1	MAN	9000	TECH	1	0.311352	0.172013	0.0265485	0.0123766	0.185967	1.81005	16.0719	0.0879991	0.122319	2.53192	0.0847636	-0.0123668	0.0723968	0.0723968	0.311352	0.172013	14.05	16400775	3407232	0.688648	0.292571
2004	32	SC Firm 32	1	US	1	MAN	2000	IND	1	0.331624	0.195175	0.183122	0.0987476	0.171305	1.69911	14.0753	0.389194	0.00248415	3.78574	0.01028	0.0132487	0.0235287	0.0235287	0.331624	0.195175	26.39	1878968	455660	0.668376	0.214666
2005	32	SC Firm 32	1	US	1	MAN	2000	IND	1	0.370491	0.216322	0.224	0.119242	0.183476	1.71268	14.1376	0.3955	0.00553364	3.34522	0.0347855	-0.102647	-0.0678617	-0.0678617	0.370491	0.216322	26.1	1821780	502875	0.629509	0.221972
2006	32	SC Firm 32	1	US	1	MAN	2000	IND	1	0.384338	0.23049	0.23213	0.126674	0.173497	1.66748	14.2864	0.371277	0.00625847	2.66663	0.0684643	0.0327133	0.101178	0.101178	0.384338	0.23049	29.52	2042784	611871	0.615662	0.219415
2007	32	SC Firm 32	1	US	1	MAN	2000	IND	1	0.399759	0.215036	0.240232	0.11509	0.175903	1.85903	14.4532	0.343371	0.00694237	1.77857	0.0797343	0.0323466	0.112081	0.112081	0.399759	0.215036	40.91	2790062	764319	0.600241	0.224934
2008	32	SC Firm 32	1	US	1	MAN	2000	IND	1	0.369158	0.221102	0.201442	0.109026	0.199428	1.66962	14.5439	0.393533	0.0116732	-0.291621	-0.0480876	-0.0586695	-0.106757	-0.106757	0.369158	0.221102	35.24	2382224	676231	0.630842	0.223431
2009	32	SC Firm 32	1	US	1	MAN	2000	IND	1	0.348818	0.220995	0.209684	0.1232	0.173274	1.5784	14.4262	0.390589	0.0159503	-2.77553	0.00313108	0.0174967	0.0206278	0.0206278	0.348818	0.220995	35.74	2405302	682356	0.651182	0.18678
2010	32	SC Firm 32	1	US	1	MAN	2000	IND	1	0.359942	0.187271	0.214051	0.10039	0.197305	1.92203	14.5463	0.356657	0.0188217	2.53192	0.0242557	-0.0500689	-0.0258132	-0.0258132	0.359942	0.187271	47.57	3175294	731661	0.640058	0.196513
2011	32	SC Firm 32	1	US	1	MAN	2000	IND	1	0.390002	0.196868	0.249796	0.113208	0.195095	1.98104	14.6645	0.349519	0.000727976	1.60145	0.0511593	-0.0529182	-0.00175891	-0.00175891	0.390002	0.196868	52.17	3435514	842129	0.609998	0.199575
2012	32	SC Firm 32	1	US	1	MAN	2000	IND	1	0.391958	0.224558	0.232237	0.119631	0.171672	1.74546	14.6618	0.364924	0.0142851	2.32108	0.02966	-0.00343958	0.0262204	0.0262204	0.391958	0.224558	47.72	3146100	911071	0.608042	0.222425
2013	32	SC Firm 32	1	US	1	MAN	2000	IND	1	0.390723	0.180406	0.245279	0.100356	0.178692	2.1658	14.7398	0.346175	0.00419504	2.21931	0.025968	0.00105174	0.0270198	0.0270198	0.390723	0.180406	67.81	4433721	975933	0.609277	0.209556
2014	32	SC Firm 32	1	US	1	MAN	2000	IND	1	0.536791	0.240148	0.426881	0.168837	0.188181	2.23525	14.7702	0.333029	0.00499875	2.3882	0.136357	-0.208	-0.0716428	-0.0716428	0.536791	0.240148	66.84	4139475	1308262	0.463209	0.202247
2010	33	SC Firm 33	1	US	0	SERV	5000	CSERV	1	0.373442	0.24152	0.0245077	0.0132446	0.185718	1.54621	14.6803	0.289028	0.0314684	2.53192	0.0738726	0.185744	0.259616	0.259616	0.373442	0.24152	13.21	1939902	617717	0.626558	0.369969
2011	33	SC Firm 33	1	US	0	SERV	5000	CSERV	1	0.345673	0.202679	0	0	0.216895	1.70552	14.885	0.265819	0.0181357	1.60145	0.00988421	0.03793	0.0478142	0.0478142	0.345673	0.202679	14.86	2501568	635900	0.654327	0.370515
2012	33	SC Firm 33	1	US	0	SERV	5000	CSERV	1	0.50073	0.324404	0.188994	0.100373	0.152328	1.54354	15.0255	0.240177	0.0381923	2.32108	0.274198	0.0258986	0.300096	0.300096	0.50073	0.324404	18.47	2927268	1405600	0.49927	0.405971
2013	33	SC Firm 33	1	US	0	SERV	5000	CSERV	1	0.41216	0.285184	0.0743543	0.0437095	0.167322	1.44524	15.3662	0.287217	0.00568029	2.21931	-0.0773061	0.0471149	-0.0301912	-0.0301912	0.41216	0.285184	21.16	2966700	1183600	0.58784	0.410802
2014	33	SC Firm 33	1	US	0	SERV	5000	CSERV	1	0.39644	0.321945	0.0836007	0.0618657	0.145976	1.23139	15.3822	0.355529	0.0155807	2.3882	0.0175427	0.0206159	0.0381587	0.0381587	0.39644	0.321945	12.56	2608216	1238400	0.60356	0.388661
2007	34	SC Firm 34	1	US	1	MAN	9000	TECH	1	0.739399	0.239087	0.599531	0.142213	0.150821	3.0926	12.7397	0.0123559	0.0456136	1.77857	-0.184321	0.217273	0.0329516	0.0329516	0.739399	0.239087	16.22	1244600	391066	0.260601	0.350443
2008	34	SC Firm 34	1	US	1	MAN	9000	TECH	1	0.687108	0.241483	0.458953	0.10951	0.0682622	2.84537	12.6495	0.0212738	0.0459556	-0.291621	-0.0179905	0.0194023	0.00141176	0.00141176	0.687108	0.241483	7.42	1197027	381088	0.312892	0.422999
2009	34	SC Firm 34	1	US	1	MAN	9000	TECH	1	0.550824	0.269982	0.325993	0.127296	0.107569	2.04022	12.6494	0.0186133	0.0296597	-2.77553	-0.187753	0.0102757	-0.177477	-0.177477	0.550824	0.269982	9.8	768494	284212	0.449176	0.338136
2010	34	SC Firm 34	1	US	1	MAN	9000	TECH	1	0.641625	0.200467	0.350683	0.0703163	-0.0340192	3.20065	12.0218	0.0204826	0.129833	2.53192	-0.0809007	0.0423303	-0.0385704	-0.0385704	0.641625	0.200467	12.7	1006615	252389	0.358375	0.448074
2011	34	SC Firm 34	1	US	1	MAN	9000	TECH	1	0.605289	0.130032	0.136348	0.0151546	-0.0340192	4.65491	12.1968	0.0168337	0.0976129	1.60145	-0.0260084	0.0176741	-0.00833429	-0.00833429	0.605289	0.130032	17.35	1619015	241991	0.394711	0.542975
2012	34	SC Firm 34	1	US	1	MAN	9000	TECH	1	0.691607	0.105332	0.0864992	0.00494644	-0.0277139	6.56598	12.4014	0.0191049	0.0675769	2.32108	0.0346207	-0.0825417	-0.0479211	-0.0479211	0.691607	0.105332	27.64	2163737	254743	0.308393	0.662405
2013	34	SC Firm 34	1	US	1	MAN	9000	TECH	1	0.733773	0.0943081	0	0	0.157009	7.29543	12.6488	0.0204547	0.129833	2.21931	0.0682094	-0.148808	-0.0805987	-0.0805987	0.733773	0.0943081	41.8	2697156	280850	0.266227	0.686634
2008	35	SC Firm 35	1	US	1	MAN	9000	TECH	1	0.380584	0.0488982	0.0902201	0.00822955	0.0806742	7.29543	11.8225	0.123081	0.0282928	-0.291621	0.214771	0.0683195	0.283091	0.283091	0.380584	0.0488982	37.62	1255267	64536	0.619416	0.319158
2009	35	SC Firm 35	1	US	1	MAN	9000	TECH	1	0.396817	0.0518038	0.0886719	0.00801563	0.124907	7.29543	12.147	0.117829	0.0285467	-2.77553	0.091071	0.0616221	0.152693	0.152693	0.396817	0.0518038	45.24	1533093	83759	0.603183	0.338128
2010	35	SC Firm 35	1	US	1	MAN	9000	TECH	1	0.3462	0.0600595	0.0512088	0.00647075	0.143405	5.76428	12.4112	0.122139	0.00614865	2.53192	0.025493	0.117667	0.14316	0.14316	0.3462	0.0600595	40.98	1415039	90417	0.6538	0.310912
2011	35	SC Firm 35	1	US	1	MAN	9000	TECH	1	0.322017	0.0606727	0	0	0.137227	5.30745	12.6887	0.149877	0.00145536	1.60145	0.0627835	0.133813	0.196596	0.196596	0.322017	0.0606727	49.12	1738848	112315	0.677983	0.322017
2012	35	SC Firm 35	1	US	1	MAN	9000	TECH	1	0.272619	0.0420644	0	0	0.14884	6.48099	12.9534	0.126117	0.0106324	2.32108	0.0104773	0.131742	0.142219	0.142219	0.272619	0.0420644	73.29	2659987	116804	0.727381	0.272619
2013	35	SC Firm 35	1	US	1	MAN	9000	TECH	1	0.481754	0.0710037	0.351543	0.0426714	0.0850155	6.78491	13.2963	0.267477	0.0519508	2.21931	0.335088	0.123666	0.458754	0.458754	0.481754	0.0710037	134.5	5019809	383667	0.518246	0.227698
2014	35	SC Firm 35	1	US	1	MAN	9000	TECH	1	0.479033	0.0743957	0.300667	0.0362198	0.101675	6.43899	13.5313	0.291365	0.00447222	2.3882	0.0673725	0.0814701	0.148843	0.148843	0.479033	0.0743957	145.7	5554667	446458	0.520967	0.266229
2004	36	SC Firm 36	1	US	1	MAN	9000	TECH	1	0.52159	0.392795	0.295088	0.198962	0.145711	1.3279	14.2553	0.518545	0.047603	3.78574	0.0324309	0.0412791	0.0737101	0.0737101	0.52159	0.392795	3.92	1873470	1211927	0.47841	0.32132
2005	36	SC Firm 36	1	US	1	MAN	9000	TECH	1	0.515304	0.4002	0.292741	0.206202	0.11413	1.28762	14.2609	0.452248	0.0378188	3.34522	-0.111359	-0.024233	-0.135592	-0.135592	0.515304	0.4002	3.09	1493601	996565	0.484696	0.314684
2006	36	SC Firm 36	1	US	1	MAN	9000	TECH	1	0.475461	0.226219	0.150492	0.0540491	0.0944489	2.10177	14.3289	0.331194	0.00490025	2.66663	-0.0725417	0.00102995	-0.0715118	-0.0715118	0.475461	0.226219	6.05	2957506	864645	0.524539	0.382538
2007	36	SC Firm 36	1	US	1	MAN	9000	TECH	1	0.516384	0.314403	0.165132	0.0782976	0.113783	1.64243	14.3097	0.34037	0.0476853	1.77857	0.00859138	-0.104713	-0.0961214	-0.0961214	0.516384	0.314403	4.32	1917376	879274	0.483616	0.420727
2008	36	SC Firm 36	1	US	1	MAN	9000	TECH	1	0.475986	0.341484	0.153138	0.0935742	0.116833	1.39387	14.2645	0.25029	0.00407185	-0.291621	-0.0984573	0.00379838	-0.0946589	-0.0946589	0.475986	0.341484	3.13	1404969	728570	0.524014	0.381229
2009	36	SC Firm 36	1	US	1	MAN	9000	TECH	1	0.451189	0.230697	0.110465	0.043334	-0.0223766	1.95577	14.0122	0.145902	0.0745735	-2.77553	-0.0718926	0.0515644	-0.0203282	-0.0203282	0.451189	0.230697	4.61	2095641	628435	0.548811	0.383036
2010	36	SC Firm 36	1	US	1	MAN	9000	TECH	1	0.361766	0.095899	0.00376127	0.000706016	0.170089	3.77236	14.3127	0.157647	0.129833	2.53192	-0.0190941	-0.0814337	-0.100528	-0.100528	0.361766	0.095899	12.32	5627628	596929	0.638234	0.359391
2011	36	SC Firm 36	1	US	1	MAN	9000	TECH	1	0.290906	0.110268	0.00424243	0.00128541	0.294229	2.63819	14.405	0.168394	0.0806126	1.60145	-0.100113	-0.187084	-0.287197	-0.287197	0.290906	0.110268	8.1	3583351	444097	0.709094	0.287923
2012	36	SC Firm 36	1	US	1	MAN	9000	TECH	1	0.304728	0.134655	0.00558916	0.00199155	0.113123	2.26302	14.1747	0.154195	0.129833	2.32108	-0.00506441	-0.0810934	-0.0861578	-0.0861578	0.304728	0.134655	6.55	2807284	436837	0.695272	0.30086
2013	36	SC Firm 36	1	US	1	MAN	9000	TECH	1	0.306537	0.110695	0.00741848	0.00210018	0.10746	2.76919	14.1423	0.136769	0.00531047	2.21931	-0.0164418	-0.0271448	-0.0435866	-0.0435866	0.306537	0.110695	7.83	3330804	414599	0.693463	0.301354
2014	36	SC Firm 36	1	US	1	MAN	9000	TECH	1	0.363588	0.124167	0.0868054	0.0230447	0.104726	2.92822	14.1615	0.116186	0.0060989	2.3882	0.0592518	-0.075707	-0.0164552	-0.0164552	0.363588	0.124167	8.395	3493814	495318	0.636412	0.303093
2004	37	SC Firm 37	1	US	1	MAN	9000	TECH	1	0.432607	0.0503512	0	0	0.271668	7.29543	14.0297	0.0609051	0.0839019	3.78574	0.093204	0.127644	0.220848	0.220848	0.432607	0.0503512	42.93	9319464	494126	0.567393	0.432607
2005	37	SC Firm 37	1	US	1	MAN	9000	TECH	1	0.40773	0.0518745	0	0	0.310149	7.29543	14.2455	0.0452869	0.0374354	3.34522	0.0432763	0.1211	0.164376	0.164376	0.40773	0.0518745	40.46	10103692	552800	0.59227	0.40773
2006	37	SC Firm 37	1	US	1	MAN	9000	TECH	1	0.379694	0.0672613	0	0	0.218971	5.64506	14.4252	0.0364951	0.0598375	2.66663	0.0721558	0.0658693	0.138025	0.138025	0.379694	0.0672613	49.76	9464500	682500	0.620306	0.379694
2007	37	SC Firm 37	1	US	1	MAN	9000	TECH	1	0.442275	0.206956	0	0	0.229138	2.13705	14.5911	0.0362535	0.00486522	1.77857	0.133758	0.0500407	0.183799	0.183799	0.442275	0.206956	19.65	3749184	978400	0.557725	0.443766
2008	37	SC Firm 37	1	US	1	MAN	9000	TECH	1	0.449168	0.166436	0.0376038	0.00947681	0.219895	2.69874	14.655	0.0498203	0.0137577	-0.291621	0.044987	0.0316024	0.0765894	0.0765894	0.449168	0.166436	25.41	5445531	1087300	0.550832	0.437022
2009	37	SC Firm 37	1	US	1	MAN	9000	TECH	1	0.397883	0.0953854	0	0	0.100686	4.17132	14.3542	0.0415168	0.0897239	-2.77553	-0.0464204	0.0444998	-0.00192056	-0.00192056	0.397883	0.0953854	38.2	9234360	973700	0.602117	0.397883
2010	37	SC Firm 37	1	US	1	MAN	9000	TECH	1	0.422693	0.126553	0	0	0.139044	3.34004	14.4843	0.0303128	0.0326335	2.53192	0.0733965	0.0236045	0.097001	0.097001	0.422693	0.126553	30.33	8132400	1178300	0.577307	0.422693
2011	37	SC Firm 37	1	US	1	MAN	9000	TECH	1	0.416662	0.133975	0	0	0.145548	3.11	14.611	0.032375	0.00603242	1.60145	0.0516141	0.032437	0.0840511	0.0840511	0.416662	0.133975	35.35	8693568	1344900	0.583338	0.416662
2012	37	SC Firm 37	1	US	1	MAN	9000	TECH	1	0.525764	0.163157	0.267355	0.0603042	0.110853	3.22244	14.6537	0.0266688	0.0202055	2.32108	0.213606	0.0168972	0.230503	0.230503	0.525764	0.163157	50.319	11618375	2265200	0.474236	0.352706
2013	37	SC Firm 37	1	US	1	MAN	9000	TECH	1	0.507835	0.159909	0.248147	0.0573909	0.0928183	3.17576	14.637	0.0283569	0.0116137	2.21931	0.014864	0.0419151	0.0567791	0.0567791	0.507835	0.159909	60.06	12259135	2333500	0.492165	0.345397
2010	38	SC Firm 38	1	US	1	MAN	3000	CGOODS	1	0.48322	0.280369	0.198461	0.093517	0.206903	1.72352	15.7855	0.181093	0.083579	2.53192	-0.0106276	0.00737929	-0.0032483	-0.0032483	0.48322	0.280369	78.94	7025660	2737200	0.51678	0.355265
2011	38	SC Firm 38	1	US	1	MAN	3000	CGOODS	1	0.455086	0.368214	0.166587	0.122415	0.190068	1.23593	15.9236	0.183283	0.00775241	1.60145	0.00763409	-0.0095467	-0.00191261	-0.00191261	0.455086	0.368214	53.49	4776657	2783900	0.544914	0.346166
2012	38	SC Firm 38	1	US	1	MAN	3000	CGOODS	1	0.427941	0.304052	0.14408	0.0895105	0.160328	1.40746	15.9277	0.187632	0.0194184	2.32108	0.00423116	0.0193751	0.0236062	0.0236062	0.427941	0.304052	67.39	6435745	2811700	0.572059	0.331644
2013	38	SC Firm 38	1	US	1	MAN	3000	CGOODS	1	0.429858	0.257268	0.134462	0.066617	0.149993	1.67086	15.9906	0.19135	0.00686618	2.21931	0.0272089	-0.0101246	0.0170843	0.0170843	0.429858	0.257268	91.8	8665920	3001700	0.570142	0.341286
2014	38	SC Firm 38	1	US	1	MAN	3000	CGOODS	1	0.539548	0.299047	0.318383	0.145347	0.138118	1.80422	16.0391	0.186782	0.00845022	2.3882	0.136251	-0.111287	0.0249634	0.0249634	0.539548	0.299047	106.12	9412844	4015800	0.460452	0.32447
2004	39	SC Firm 39	1	US	1	MAN	2000	IND	1	0.730052	0.385406	0.0131888	0.00308945	0.0784686	1.89424	15.8006	0.0304136	0.00791355	3.78574	0.0604958	-0.0287338	0.0317621	0.0317621	0.730052	0.385406	34.9479	24588376	15419108	0.269948	0.686634
2005	39	SC Firm 39	1	US	1	MAN	2000	IND	1	0.781912	0.469983	0.0124133	0.00309907	0.0541618	1.6637	15.6289	0.0230994	0.0136869	3.34522	0.22356	-0.0115129	0.212047	0.212047	0.781912	0.469983	36.1694	24350994	21592800	0.218088	0.686634
2006	39	SC Firm 39	1	US	1	MAN	2000	IND	1	0.777665	0.45643	0.0120104	0.00290987	0.0561729	1.7038	15.7377	0.0254637	0.000871028	2.66663	-0.00781008	-0.0384138	-0.0462239	-0.0462239	0.777665	0.45643	38.8092	25459490	21378100	0.222335	0.686634
2007	39	SC Firm 39	1	US	1	MAN	2000	IND	1	0.802033	0.451451	0.00817808	0.00167219	0.0643704	1.77657	15.8696	0.0271606	0.00658114	1.77857	-0.00018012	-0.0414088	-0.041589	-0.041589	0.802033	0.451451	39.0647	25970226	21373300	0.197967	0.686634
2008	39	SC Firm 39	1	US	1	MAN	2000	IND	1	0.778499	0.463567	0.00981297	0.00243075	0.0858669	1.67937	15.9827	0.0313006	0.0112604	-0.291621	-0.122021	-0.0282164	-0.150238	-0.150238	0.778499	0.463567	34.5117	21381570	18477200	0.221501	0.686634
2009	39	SC Firm 39	1	US	1	MAN	2000	IND	1	0.780027	0.526558	0.121697	0.0416484	0.084231	1.48137	15.9946	0.0289645	0.000256134	-2.77553	0.0511918	-0.0144882	0.0367037	0.0367037	0.780027	0.526558	37.5646	17780248	19775000	0.219973	0.686634
2010	39	SC Firm 39	1	US	1	MAN	2000	IND	1	0.78463	0.515519	0.00730967	0.00214604	0.0777635	1.52202	16.0047	0.0250836	0.00413009	2.53192	0.0484659	-0.0121658	0.0363001	0.0363001	0.78463	0.515519	40.6	19807920	21076900	0.21537	0.686634
2011	39	SC Firm 39	1	US	1	MAN	2000	IND	1	0.813545	0.51861	0.00576243	0.00142899	0.0621497	1.5687	16.1013	0.0209181	0.00939872	1.60145	0.197951	0.00136397	0.199315	0.199315	0.813545	0.51861	47.3812	25855344	27854400	0.186455	0.686634
2012	39	SC Firm 39	1	US	1	MAN	2000	IND	1	0.789226	0.474366	0.00257973	0.000622975	0.0733709	1.66375	16.1759	0.0229189	0.0071055	2.32108	-0.114627	-0.0169644	-0.131591	-0.131591	0.789226	0.474366	49.9429	26950572	24321900	0.210774	0.686634
2013	39	SC Firm 39	1	US	1	MAN	2000	IND	1	0.800909	0.43747	0.00228296	0.000442151	0.0594829	1.83078	16.0607	0.0225796	0.00799861	2.21931	0.0471642	-0.0202429	0.0269213	0.0269213	0.800909	0.43747	70.8824	33231836	25843800	0.199091	0.686634
2014	39	SC Firm 39	1	US	1	MAN	2000	IND	1	0.785211	0.398041	0.240833	0.0542669	0.0649318	1.97269	16.1405	0.020808	0.00347752	2.3882	-0.0209016	-0.00470371	-0.0256053	-0.0256053	0.785211	0.398041	83.37	38070256	25173700	0.214789	0.686634
2004	40	SC Firm 40	1	US	0	SERV	5000	CSERV	1	0.923092	0.383665	0.861847	0.237515	0.282576	2.48845	15.5449	0.457523	0.00820489	3.78574	0.0875068	0.0237581	0.111265	0.111265	0.923092	0.383665	91.31	6000766	3735444	0.0769082	0.478439
2005	40	SC Firm 40	1	US	0	SERV	5000	CSERV	1	0.907896	0.345366	0.826439	0.203092	0.261765	2.62879	15.5579	0.456419	0.0179829	3.34522	0.0279856	0.0998189	0.127805	0.127805	0.907896	0.345366	91.75	7305648	3854250	0.0921044	0.469324
2006	40	SC Firm 40	1	US	0	SERV	5000	CSERV	1	0.896267	0.395558	0.798199	0.230525	0.253936	2.26583	15.5986	0.453197	0.00473835	2.66663	0.0447447	-0.0243932	0.0203515	0.0203515	0.896267	0.395558	115.56	6199061	4056778	0.103733	0.485964
2007	40	SC Firm 40	1	US	0	SERV	5000	CSERV	1	0.916082	0.351229	0.827605	0.192296	0.25281	2.60822	15.6352	0.453272	0.0024691	1.77857	0.0717486	-0.011066	0.0606826	0.0606826	0.916082	0.351229	119.91	8130230	4401509	0.0839177	0.513224
2008	40	SC Firm 40	1	US	0	SERV	5000	CSERV	1	0.923092	0.380655	0.861847	0.215727	0.246075	2.51227	15.6908	0.435535	0.00410159	-0.291621	0.119061	0.0316594	0.15072	0.15072	0.923092	0.380655	139.47	8179869	5027425	0.0769082	0.528318
2004	41	SC Firm 41	1	US	1	MAN	1	OILGAS	1	0.394939	0.157944	0.219733	0.0748662	0.17416	2.50051	15.6204	0.1953	0.0183763	3.78574	-0.0224591	0.0268277	0.00436867	0.00436867	0.394939	0.157944	42.67	14362722	2694000	0.605061	0.258543
2005	41	SC Firm 41	1	US	1	MAN	1	OILGAS	1	0.369073	0.121902	0.180901	0.0498025	0.206958	3.02762	15.7876	0.173617	0.0270782	3.34522	0.0240157	0.0104132	0.0344289	0.0344289	0.369073	0.121902	60.78	20756370	2881500	0.630927	0.258947
2006	41	SC Firm 41	1	US	1	MAN	1	OILGAS	1	0.363279	0.116933	0.162446	0.0430749	0.272006	3.10674	16.0158	0.206819	0.0454029	2.66663	0.0322892	-0.187142	-0.154853	-0.154853	0.363279	0.116933	74.66	23883734	3162600	0.636721	0.274269
2007	41	SC Firm 41	1	US	1	MAN	1	OILGAS	1	0.318102	0.109193	0.13897	0.0406845	0.283972	2.91321	16.16	0.237871	0.00629758	1.77857	-0.00275957	-0.01325	-0.0160096	-0.0160096	0.318102	0.109193	81.1	25578940	3135400	0.681898	0.250208
2008	41	SC Firm 41	1	US	1	MAN	1	OILGAS	1	0.393727	0.32031	0.24496	0.190564	0.259253	1.22921	16.289	0.23885	0.018064	-0.291621	0.129382	-0.0832898	0.0460922	0.0460922	0.393727	0.32031	32.07	9909630	4670000	0.606273	0.229407
2009	41	SC Firm 41	1	US	1	MAN	1	OILGAS	1	0.336218	0.233434	0.191632	0.124742	0.139785	1.44031	16.0839	0.276335	0.090452	-2.77553	-0.0720343	0.0145118	-0.0575225	-0.0575225	0.336218	0.233434	40.48	12629760	3846000	0.663782	0.205875
2010	41	SC Firm 41	1	US	1	MAN	1	OILGAS	1	0.327417	0.233557	0.200827	0.135923	0.113895	1.40187	16.4837	0.274515	0.00717947	2.53192	0.160097	0.317411	0.477508	0.477508	0.327417	0.233557	57.17	24697440	7526000	0.672583	0.217567
2011	41	SC Firm 41	1	US	1	MAN	1	OILGAS	1	0.333682	0.280607	0.197285	0.160673	0.17314	1.18914	16.8028	0.298426	0.0372358	1.60145	0.0307884	-0.0153741	0.0154143	0.0154143	0.333682	0.280607	48.64	21255680	8291000	0.666318	0.202519
2012	41	SC Firm 41	1	US	1	MAN	1	OILGAS	1	0.332534	0.330063	0.216278	0.214393	0.140882	1.00749	16.8771	0.326239	0.0268729	2.32108	0.0218817	0.00786841	0.0297501	0.0297501	0.332534	0.330063	40.8477	18013836	8875000	0.667466	0.176252
2013	41	SC Firm 41	1	US	1	MAN	1	OILGAS	1	0.336507	0.27973	0.191185	0.153263	0.130558	1.20297	16.923	0.324909	0.00873956	2.21931	0.0187943	-0.00390205	0.0148922	0.0148922	0.336507	0.27973	55.26	24203880	9400000	0.663493	0.209064
2014	41	SC Firm 41	1	US	1	MAN	1	OILGAS	1	0.328234	0.279971	0.175887	0.145184	0.164221	1.17239	17.0163	0.314393	0.0223142	2.3882	0.00215076	-0.021126	-0.0189753	-0.0189753	0.328234	0.279971	56.07	24334380	9462000	0.671766	0.210532
2004	42	SC Firm 42	1	US	0	SERV	4000	HCARE	1	0.738107	0.328518	0.536817	0.167491	0.1401	2.24678	16.0677	0.308829	0.0104064	3.78574	0.0082703	0.0207818	0.0290521	0.0290521	0.738107	0.328518	18.7641	21343140	10442000	0.261893	0.43458
2005	42	SC Firm 42	1	US	0	SERV	4000	HCARE	1	0.662214	0.263743	0.437083	0.124249	0.162646	2.51084	16.1029	0.325607	0.0131309	3.34522	-0.158246	0.0332364	-0.12501	-0.12501	0.662214	0.263743	20.4537	23527403	8428000	0.337786	0.399937
2006	42	SC Firm 42	1	US	0	SERV	4000	HCARE	1	0.572927	0.218037	0.308718	0.0849388	0.1624	2.62765	16.1552	0.287961	0.00363497	2.66663	-0.000953289	0.0770802	0.0761269	0.0761269	0.572927	0.218037	25.2017	30175702	8414000	0.427073	0.382201
2007	42	SC Firm 42	1	US	0	SERV	4000	HCARE	1	0.547797	0.185515	0.308746	0.0774735	0.186478	2.95284	16.237	0.293383	0.0174203	1.77857	-0.00235386	-0.0303387	-0.0326926	-0.0326926	0.547797	0.185515	31.5361	36782679	8378000	0.452203	0.345822
2008	42	SC Firm 42	1	US	0	SERV	4000	HCARE	1	0.595651	0.217507	0.376164	0.102157	0.214021	2.73853	16.329	0.299189	0.0174585	-0.291621	0.0518014	-0.136514	-0.0847128	-0.0847128	0.595651	0.217507	29.1132	33011063	9176000	0.404349	0.351834
2009	42	SC Firm 42	1	US	0	SERV	4000	HCARE	1	0.585629	0.223717	0.365985	0.105313	0.206811	2.61773	16.3462	0.29728	0.00254493	-2.77553	0.0568745	-0.0337674	0.0231071	0.0231071	0.585629	0.223717	31.8784	35265019	10163000	0.414371	0.346433
2010	42	SC Firm 42	1	US	0	SERV	4000	HCARE	1	0.624507	0.270892	0.400493	0.129855	0.205786	2.30538	16.3683	0.30076	0.00259151	2.53192	0.0433987	-0.0689576	-0.0255589	-0.0255589	0.624507	0.270892	27.4997	29396722	10922000	0.375493	0.373663
2011	42	SC Firm 42	1	US	0	SERV	4000	HCARE	1	0.654748	0.310301	0.441002	0.157654	0.203796	2.11004	16.4469	0.289677	0.000882631	1.60145	0.0821056	-0.0779112	0.00419441	0.00419441	0.654748	0.310301	26.8804	27756820	12488000	0.345252	0.382373
2012	42	SC Firm 42	1	US	0	SERV	4000	HCARE	1	0.659735	0.269781	0.460833	0.140055	0.189407	2.44544	16.45	0.299068	0.010027	2.32108	0.0472781	-0.0542423	-0.0069642	-0.0069642	0.659735	0.269781	36.2136	36410595	13452000	0.340265	0.368906
2013	42	SC Firm 42	1	US	0	SERV	4000	HCARE	1	0.664486	0.307376	0.519939	0.195294	0.162147	2.1618	16.5214	0.310498	0.017655	2.21931	0.131185	0.0222407	0.153425	0.153425	0.664486	0.307376	37.7836	37768290	16761000	0.335514	0.301102
2014	42	SC Firm 42	1	US	0	SERV	4000	HCARE	1	0.686692	0.309255	0.526503	0.185097	0.166725	2.22047	16.6292	0.171085	0.00111199	2.3882	0.0399738	-0.0662885	-0.0263148	-0.0263148	0.686692	0.309255	39.8154	39750890	17797000	0.313308	0.338311
2004	43	SC Firm 43	1	US	0	SERV	4000	HCARE	1	0.451243	0.167618	0.278875	0.0865112	0.209749	2.69208	15.4118	0.326983	0.0124641	3.78574	0.00418908	-0.0274586	-0.0232696	-0.0232696	0.451243	0.167618	56.8	12890613	2595810	0.548757	0.254481
2005	43	SC Firm 43	1	US	0	SERV	4000	HCARE	1	0.440443	0.172188	0.269705	0.0889149	0.235865	2.55793	15.4909	0.315308	0.0135978	3.34522	0.0171759	-0.0434053	-0.0262295	-0.0262295	0.440443	0.172188	60.08	12986084	2701146	0.559557	0.257876
2006	43	SC Firm 43	1	US	0	SERV	4000	HCARE	1	0.410841	0.139139	0.256098	0.0738966	0.228375	2.95274	15.5626	0.31263	0.00112683	2.66663	0.0150412	0.00721486	0.0222561	0.0222561	0.410841	0.139139	70.15	17347231	2803795	0.589159	0.235054
2007	43	SC Firm 43	1	US	0	SERV	4000	HCARE	1	0.392857	0.125813	0.207248	0.0549522	0.231931	3.12254	15.6533	0.34073	0.00228694	1.77857	0.0103148	-0.0301324	-0.0198175	-0.0198175	0.392857	0.125813	83.58	20006834	2879396	0.607143	0.246142
2008	43	SC Firm 43	1	US	0	SERV	4000	HCARE	1	0.358247	0.126869	0.185239	0.0558721	0.240001	2.82375	15.7467	0.346834	0.00690735	-0.291621	-0.00563747	-0.027122	-0.0327595	-0.0327595	0.358247	0.126869	68.39	19509390	2834787	0.641753	0.230361
2009	43	SC Firm 43	1	US	0	SERV	4000	HCARE	1	0.435008	0.196637	0.264592	0.102639	0.219305	2.21224	15.7595	0.318834	0.00875372	-2.77553	0.130344	-0.0790318	0.051312	0.051312	0.435008	0.196637	78.86	16536483	4047587	0.564992	0.244017
2010	43	SC Firm 43	1	US	0	SERV	4000	HCARE	1	0.421331	0.192749	0.233172	0.0906748	0.203873	2.18591	15.779	0.321271	0.00828708	2.53192	0.00192235	-0.0667184	-0.0647961	-0.0647961	0.421331	0.192749	84.52	17029406	4066139	0.578669	0.260914
2011	43	SC Firm 43	1	US	0	SERV	4000	HCARE	1	0.515451	0.254481	0.349848	0.147244	0.203278	2.0255	15.8416	0.307868	0.00112765	1.60145	0.125617	-0.138044	-0.0124273	-0.0124273	0.515451	0.254481	74.72	15750456	5376376	0.484549	0.27637
2012	43	SC Firm 43	1	US	0	SERV	4000	HCARE	1	0.612919	0.31041	0.486493	0.212179	0.173456	1.97455	15.8578	0.290815	0.0188605	2.32108	0.139684	-0.128357	0.0113272	0.0113272	0.612919	0.31041	78.19	15469338	6963315	0.387081	0.269236
2013	43	SC Firm 43	1	US	0	SERV	4000	HCARE	1	0.551321	0.256611	0.421399	0.169848	0.178039	2.14847	15.9017	0.286114	0.00409403	2.21931	-0.0218384	0.012082	-0.00975644	-0.00975644	0.551321	0.256611	110.49	19403785	6698000	0.448679	0.258128
2014	43	SC Firm 43	1	US	0	SERV	4000	HCARE	1	0.563268	0.243014	0.422132	0.153854	0.174179	2.31785	15.9492	0.289628	0.00287814	2.3882	0.0251466	-0.062505	-0.0373584	-0.0373584	0.563268	0.243014	139.16	21839229	7011000	0.436732	0.275006
2004	44	SC Firm 44	1	US	0	SERV	5000	CSERV	1	0.31132	0.0830584	0	0	0.278097	3.7482	15.4541	0.190511	0.0173074	3.78574	0.0381296	-0.0912575	-0.0531278	-0.0531278	0.31132	0.0830584	36.15	10997956	996217	0.68868	0.31132
2005	44	SC Firm 44	1	US	0	SERV	5000	CSERV	1	0.33106	0.100361	0	0	0.292797	3.2987	15.575	0.218424	0.00870744	3.34522	0.0365074	-0.152022	-0.115514	-0.115514	0.33106	0.100361	38.1	10036963	1119690	0.66894	0.33106
2006	44	SC Firm 44	1	US	0	SERV	5000	CSERV	1	0.330905	0.106791	0	0	0.258216	3.09863	15.7052	0.234765	0.0249676	2.66663	0.0481052	-0.0340795	0.0140257	0.0140257	0.330905	0.106791	29.39	10958277	1310153	0.669095	0.330905
2007	44	SC Firm 44	1	US	0	SERV	5000	CSERV	1	0.333568	0.148754	0	0	0.259045	2.24242	15.7684	0.291852	0.00469035	1.77857	-0.00725477	-0.172533	-0.179788	-0.179788	0.333568	0.148754	25.42	7337793	1282265	0.666432	0.333568
2008	44	SC Firm 44	1	US	0	SERV	5000	CSERV	1	0.297127	0.186527	0	0	0.198999	1.59294	15.7907	0.269027	0.0425245	-0.291621	-0.00325053	0.00315566	-9.48735e-05	-9.48735e-05	0.297127	0.186527	38.61	5531631	1268389	0.702873	0.297127
2009	44	SC Firm 44	1	US	0	SERV	5000	CSERV	1	0.290991	0.120532	0	0	0.226104	2.41423	15.8733	0.217248	0.0229683	-2.77553	0.0448042	0.0101739	0.054978	0.054978	0.290991	0.120532	49.15	10939186	1499226	0.709009	0.290991
2010	44	SC Firm 44	1	US	0	SERV	5000	CSERV	1	0.303662	0.124632	0	0	0.260756	2.43647	15.9855	0.197708	0.0267665	2.53192	0.0381333	-0.0907829	-0.0526496	-0.0526496	0.303662	0.124632	57.97	12042218	1714534	0.696338	0.303662
2011	44	SC Firm 44	1	US	0	SERV	5000	CSERV	1	0.314788	0.112518	0	0	0.306093	2.79766	16.0668	0.209319	0.0323666	1.60145	0.0152823	-0.174454	-0.159171	-0.159171	0.314788	0.112518	55.91	14213330	1802018	0.685212	0.314788
2012	44	SC Firm 44	1	US	0	SERV	5000	CSERV	1	0.350356	0.148567	0	0	0.291873	2.35823	16.2056	0.233547	0.00926869	2.32108	0.0634088	-0.140222	-0.076813	-0.076813	0.350356	0.148567	80.3	12609369	2200222	0.649644	0.350356
2013	44	SC Firm 44	1	US	0	SERV	5000	CSERV	1	0.379914	0.147733	0	0	0.28845	2.57162	16.2582	0.248552	0.0048369	2.21931	0.0337512	-0.182619	-0.148868	-0.148868	0.379914	0.147733	76.17	13930567	2414746	0.620086	0.379914
2014	44	SC Firm 44	1	US	0	SERV	5000	CSERV	1	0.594142	0.235947	0.353508	0.103419	0.265348	2.51812	16.2905	0.248069	0.0170166	2.3882	0.236878	-0.208	0.0288778	0.0288778	0.594142	0.235947	48.25	13004129	4015803	0.405858	0.372216
2004	45	SC Firm 45	1	US	0	SERV	5000	CSERV	1	0.379615	0.295969	0.128939	0.0923099	0.0986996	1.28261	15.2384	0.37422	0.0197407	3.78574	-0.0194222	-0.0329099	-0.052332	-0.052332	0.379615	0.295969	12.01	1565426	658094	0.620385	0.287782
2005	45	SC Firm 45	1	US	0	SERV	5000	CSERV	1	0.336373	0.160947	0.00507275	0.0019258	0.0833776	2.08996	15.3039	0.359326	0.0165305	3.34522	-0.0684843	0.00819565	-0.0602886	-0.0602886	0.336373	0.160947	22.92	2850458	546773	0.663627	0.332989
2006	45	SC Firm 45	1	US	0	SERV	5000	CSERV	1	0.343397	0.28982	0	0	0.156402	1.18486	15.3722	0.293891	0.0572787	2.66663	0.0256026	-0.0424672	-0.0168646	-0.0168646	0.343397	0.28982	15.99	1447762	590823	0.656603	0.343397
2007	45	SC Firm 45	1	US	0	SERV	5000	CSERV	1	0.557779	0.424077	0.204067	0.130191	0.225212	1.31528	15.3537	0.333399	0.0469451	1.77857	0.148569	-0.208	-0.0594314	-0.0594314	0.557779	0.424077	14.49	1093687	805329	0.442221	0.444398
2008	45	SC Firm 45	1	US	0	SERV	5000	CSERV	1	0.45908	0.220305	0.0737557	0.0258256	0.232919	2.08384	15.3514	0.342098	0.00997369	-0.291621	-0.103121	-0.0105092	-0.11363	-0.11363	0.45908	0.220305	28.98	2327404	657613	0.54092	0.416007
2009	45	SC Firm 45	1	US	0	SERV	5000	CSERV	1	0.40017	0.221264	0	0	0.231837	1.80857	15.3688	0.294255	0.00632068	-2.77553	0.00627017	0.0156922	0.0219624	0.0219624	0.40017	0.221264	30.46	2351307	668081	0.59983	0.40017
2010	45	SC Firm 45	1	US	0	SERV	5000	CSERV	1	0.415415	0.20913	0	0	0.272074	1.9864	15.4154	0.324096	0.0258584	2.53192	0.00291739	-0.171118	-0.168201	-0.168201	0.415415	0.20913	37.76	2544360	672806	0.584585	0.415415
2011	45	SC Firm 45	1	US	0	SERV	5000	CSERV	1	0.498429	0.306378	0.0741171	0.0343591	0.26432	1.62684	15.4563	0.348969	0.00999597	1.60145	0.0885092	-0.201439	-0.11293	-0.11293	0.498429	0.306378	28.46	1852079	818077	0.501571	0.458278
2012	45	SC Firm 45	1	US	0	SERV	5000	CSERV	1	0.566136	0.39171	0.183684	0.0999468	0.230476	1.44529	15.4958	0.338477	0.0278969	2.32108	0.0996301	-0.136585	-0.0369549	-0.0369549	0.566136	0.39171	32.29	1541711	992791	0.433864	0.470045
2013	45	SC Firm 45	1	US	0	SERV	5000	CSERV	1	0.481819	0.256529	0.0786977	0.0307239	0.197366	1.87823	15.4496	0.327479	0.0266393	2.21931	-0.088882	0.00879341	-0.0800886	-0.0800886	0.481819	0.256529	40.02	2429190	838172	0.518181	0.437556
2004	46	SC Firm 46	1	US	0	SERV	4000	HCARE	1	0.56163	0.342003	0.420016	0.227081	0.130477	1.64218	13.9017	0.147508	0.0413789	3.78574	0.210231	0.0163486	0.226579	0.226579	0.56163	0.342003	57.37	1482103	770342	0.43837	0.247368
2005	46	SC Firm 46	1	US	0	SERV	4000	HCARE	1	0.537177	0.308681	0.393863	0.199986	0.12295	1.74023	13.9819	0.126357	0.00650042	3.34522	-0.00281442	-0.0158238	-0.0186383	-0.0186383	0.537177	0.308681	65.44	1716260	766327	0.462823	0.238037
2006	46	SC Firm 46	1	US	0	SERV	4000	HCARE	1	0.481853	0.260167	0.341372	0.163876	0.127938	1.85209	14.0576	0.118801	0.0093947	2.66663	0.00174856	0.0398028	0.0415514	0.0415514	0.481853	0.260167	82.52	2187128	769118	0.518147	0.217999
2007	46	SC Firm 46	1	US	0	SERV	4000	HCARE	1	0.481179	0.254039	0.309005	0.141045	0.106081	1.89411	14.1947	0.137737	0.0153115	1.77857	0.0910791	0.054706	0.145785	0.145785	0.481179	0.254039	103.62	2785734	948689	0.518821	0.275144
2008	46	SC Firm 46	1	US	0	SERV	4000	HCARE	1	0.468057	0.316689	0.295957	0.181279	0.151085	1.47797	14.3833	0.147616	0.0222458	-0.291621	0.0023885	-0.0140905	-0.011702	-0.011702	0.468057	0.316689	75.31	2057455	953555	0.531943	0.26534
2009	46	SC Firm 46	1	US	0	SERV	4000	HCARE	1	0.486319	0.317157	0.363231	0.218659	0.132693	1.53337	14.3945	0.119257	0.00800848	-2.77553	0.11029	0.0292963	0.139586	0.139586	0.486319	0.317157	96.46	2655165	1233233	0.513681	0.210216
2004	47	SC Firm 47	1	US	0	SERV	4000	HCARE	1	0.154661	0.0609419	0.0988906	0.0374685	0.0526799	2.53784	14.6092	0.166405	0.00682163	3.78574	0.00821394	-0.0244716	-0.0162577	-0.0162577	0.154661	0.0609419	66.61	21843684	1417586	0.845339	0.162458
2005	47	SC Firm 47	1	US	0	SERV	4000	HCARE	1	0.0851328	0.0450292	0.00563359	0.00286259	0.0902393	1.89061	14.7003	0.140114	0.0265279	3.34522	-0.0839956	0.016767	-0.0672286	-0.0672286	0.0851328	0.0450292	45.28	15133029	713559	0.914867	0.170895
2006	47	SC Firm 47	1	US	0	SERV	4000	HCARE	1	0.0887878	0.0436575	0.0122551	0.00577917	0.131391	2.03374	14.8025	0.149703	0.031955	2.66663	0.00535801	-0.00415676	0.00120124	0.00120124	0.0887878	0.0436575	49.19	16634779	759385	0.911212	0.152738
2007	47	SC Firm 47	1	US	0	SERV	4000	HCARE	1	0.298186	0.1326	0.205148	0.0849717	0.144131	2.24876	14.9698	0.173535	0.0089359	1.77857	0.210181	-0.208	0.00218039	0.00218039	0.298186	0.1326	56.92	16831130	2572995	0.701814	0.177492
2008	47	SC Firm 47	1	US	0	SERV	4000	HCARE	1	0.273251	0.144476	0.152999	0.0750434	0.199459	1.89132	15.2259	0.188083	0.0317552	-0.291621	-0.0302045	-0.0608644	-0.091069	-0.091069	0.273251	0.144476	47.63	13719631	2316891	0.726749	0.183962
2009	47	SC Firm 47	1	US	0	SERV	4000	HCARE	1	0.244357	0.124428	0.145458	0.0695975	0.20189	1.96384	15.292	0.19143	0.00486959	-2.77553	-0.0265656	-0.0583104	-0.084876	-0.084876	0.244357	0.124428	53.5	14704743	2089706	0.755643	0.14387
2010	47	SC Firm 47	1	US	0	SERV	4000	HCARE	1	0.308315	0.133975	0.176964	0.0694415	0.238461	2.30128	15.3666	0.202859	0.0303077	2.53192	0.0500873	-0.206152	-0.156065	-0.156065	0.308315	0.133975	67.05	16128073	2495037	0.691685	0.184425
2011	47	SC Firm 47	1	US	0	SERV	4000	HCARE	1	0.262493	0.0818554	0.137512	0.0384029	0.235618	3.20679	15.4346	0.173642	0.00136566	1.60145	-0.0132134	-0.0174144	-0.0306277	-0.0306277	0.262493	0.0818554	110.05	26644756	2375461	0.737507	0.172384
2012	47	SC Firm 47	1	US	0	SERV	4000	HCARE	1	0.291341	0.0785348	0.137119	0.0318926	0.217667	3.70971	15.5232	0.171985	0.0107358	2.32108	0.0568465	-0.0864137	-0.0295672	-0.0295672	0.291341	0.0785348	146.37	34628507	2951323	0.708659	0.200177
2013	47	SC Firm 47	1	US	0	SERV	4000	HCARE	1	0.253768	0.043579	0.0630696	0.00893876	0.25465	5.82318	15.7517	0.147573	0.0200881	2.21931	0.00499151	-0.0158758	-0.0108843	-0.0108843	0.253768	0.043579	279.572	66071810	3010539	0.746232	0.223138
2014	47	SC Firm 47	1	US	0	SERV	4000	HCARE	1	0.241367	0.041589	0.0509844	0.00727402	0.32169	5.80362	16.088	0.123347	0.0450575	2.3882	0.0310571	-0.0648221	-0.033765	-0.033765	0.241367	0.041589	339.45	79622410	3455115	0.758633	0.204149
2006	48	SC Firm 48	1	US	0	SERV	4000	HCARE	1	0.745807	0.186929	0.717553	0.166019	-0.0340192	3.9898	11.3411	0.119684	0.129833	2.66663	0.157236	0.410394	0.567631	0.567631	0.745807	0.186929	16.39	1503381	345634	0.254193	0.100033
2007	48	SC Firm 48	1	US	0	SERV	4000	HCARE	1	0.76974	0.154365	0.752328	0.142272	-0.0340192	4.98651	11.7083	0.094223	0.016569	1.77857	0.345795	0.105151	0.450945	0.450945	0.76974	0.154365	35.4	3437841	627553	0.23026	0.0775952
2008	48	SC Firm 48	1	US	0	SERV	4000	HCARE	1	0.694853	0.261672	0.672484	0.24218	0.063276	2.65544	12.5998	0.13784	0.0806916	-0.291621	0.00272087	0.0640987	0.0668196	0.0668196	0.694853	0.261672	17.8	1777653	630020	0.305147	0.0775952
2009	48	SC Firm 48	1	US	0	SERV	4000	HCARE	1	0.646033	0.237805	0.604965	0.207476	0.0407801	2.71665	12.6905	0.217127	0.0183399	-2.77553	-0.0408891	0.0528347	0.0119455	0.0119455	0.646033	0.237805	18.81	1899094	592518	0.353967	0.106644
2010	48	SC Firm 48	1	US	0	SERV	4000	HCARE	1	0.403009	0.145876	0.333707	0.112461	0.0225348	2.76269	12.8381	0.175718	0.0133665	2.53192	-0.066266	0.176862	0.110596	0.110596	0.403009	0.145876	26.93	2979386	508849	0.596991	0.132934
2011	48	SC Firm 48	1	US	0	SERV	4000	HCARE	1	0.379492	0.111551	0.300664	0.0811048	0.00230986	3.40197	12.9976	0.205996	0.0172117	1.60145	-0.010219	0.0844484	0.0742294	0.0742294	0.379492	0.111551	34.38	3946471	495506	0.620508	0.141174
2012	48	SC Firm 48	1	US	0	SERV	4000	HCARE	1	0.352335	0.0819566	0.255299	0.0532613	-0.0340192	4.29905	13.1238	0.181384	0.0325001	2.32108	0.0363937	0.203977	0.240371	0.240371	0.352335	0.0819566	49.2	6189811	552584	0.647665	0.130303
2013	48	SC Firm 48	1	US	0	SERV	4000	HCARE	1	0.402404	0.0821248	0.32834	0.0609929	-0.0340192	4.89991	13.2149	0.142294	0.00280921	2.21931	0.156161	0.223537	0.379698	0.379698	0.402404	0.0821248	70.35	10092669	903019	0.597596	0.11027
2014	48	SC Firm 48	1	US	0	SERV	4000	HCARE	1	0.3865	0.0666563	0.301013	0.046546	-0.0340192	5.79839	13.5292	0.210209	0.00356522	2.3882	0.0239073	0.128821	0.152728	0.152728	0.3865	0.0666563	90.4	13478066	962559	0.6135	0.1223
2004	49	SC Firm 49	1	US	0	SERV	4000	HCARE	1	0.0861396	0.0244462	0.0506157	0.00878973	0.266435	5.58046	11.9908	0.247355	0.0031262	3.78574	0.00422172	0.0242395	0.0284613	0.0284613	0.0861396	0.0244462	38.9	1788181	28035	0.91386	0.0775952
2005	49	SC Firm 49	1	US	0	SERV	4000	HCARE	1	0.0927783	0.0244462	0.0517408	0.00817255	0.347656	6.10033	12.0932	0.301548	0.055377	3.34522	-0.00217095	0.0275111	0.0253401	0.0253401	0.0927783	0.0244462	56.08	1773809	27394	0.907222	0.0775952
2006	49	SC Firm 49	1	US	0	SERV	4000	HCARE	1	0.0846403	0.0244462	0.0379535	0.00665199	0.311617	5.49302	12.2191	0.239593	0.027053	2.66663	0.00747614	0.068014	0.0754901	0.0754901	0.0846403	0.0244462	55.45	2005066	30164	0.91536	0.0775952
2007	49	SC Firm 49	1	US	0	SERV	4000	HCARE	1	0.0846403	0.0244462	0	0	0.288336	5.00051	12.3171	0.201245	0.0140619	1.77857	-0.0285175	0.0336203	0.00510285	0.00510285	0.0846403	0.0244462	66.05	2257259	17193	0.91536	0.0775952
2008	49	SC Firm 49	1	US	0	SERV	4000	HCARE	1	0.0846403	0.0244462	0	0	0.29869	5.93426	12.4585	0.200489	0.00807746	-0.291621	0.00600352	0.00908609	0.0150896	0.0150896	0.0846403	0.0244462	64.52	2990619	20239	0.91536	0.0775952
2009	49	SC Firm 49	1	US	0	SERV	4000	HCARE	1	0.0846403	0.0244462	0	0	0.335899	5.06788	12.4835	0.212144	0.0247933	-2.77553	-0.00999142	-0.0361882	-0.0461796	-0.0461796	0.0846403	0.0244462	68.56	2376541	15523	0.91536	0.0775952
2010	49	SC Firm 49	1	US	0	SERV	4000	HCARE	1	0.0846403	0.0244462	0	0	0.316987	4.13364	12.5026	0.187735	0.0128191	2.53192	0.00289313	-0.017671	-0.0147779	-0.0147779	0.0846403	0.0244462	65.67	2127573	17024	0.91536	0.0775952
2011	49	SC Firm 49	1	US	0	SERV	4000	HCARE	1	0.0846403	0.0244462	0	0	0.282408	5.04423	12.5775	0.154448	0.0233302	1.60145	0.0018845	0.0406026	0.0424871	0.0424871	0.0846403	0.0244462	68.26	3097479	18188	0.91536	0.0775952
2012	49	SC Firm 49	1	US	0	SERV	4000	HCARE	1	0.0846403	0.0244462	0	0	0.281183	3.84843	12.6589	0.130384	0.00316147	2.32108	0.0244146	0.0505669	0.0749815	0.0749815	0.0846403	0.0244462	68.34	2732516	35750	0.91536	0.0775952
2013	49	SC Firm 49	1	US	0	SERV	4000	HCARE	1	0.0846403	0.0244462	0	0	0.220277	3.31144	12.6462	0.139772	0.0420091	2.21931	-0.00471149	-0.00621644	-0.0109279	-0.0109279	0.0846403	0.0244462	94.67	2544540	32084	0.91536	0.0775952
2014	49	SC Firm 49	1	US	0	SERV	4000	HCARE	1	0.0846403	0.0244462	0.0153744	0.0037653	0.210057	4.01011	12.7876	0.135793	0.0117504	2.3882	0.0015119	0.0203306	0.0218425	0.0218425	0.0846403	0.0244462	92.4	3425294	33388	0.91536	0.0775952
2004	50	SC Firm 50	1	US	1	MAN	3000	CGOODS	1	0.5481	0.387855	0.268205	0.160693	0.128021	1.41316	15.0755	0.334165	0.00163368	3.78574	0.0315945	0.0246522	0.0562466	0.0562466	0.5481	0.387855	13.5425	3052869	1934300	0.4519	0.399649
2005	50	SC Firm 50	1	US	1	MAN	3000	CGOODS	1	0.572089	0.403114	0.297342	0.176118	0.150095	1.41917	15.2727	0.342617	0.000539316	3.34522	0.0990854	-0.012887	0.0861985	0.0861985	0.572089	0.403114	15.1575	3464064	2339500	0.427911	0.416858
2006	50	SC Firm 50	1	US	1	MAN	3000	CGOODS	1	0.567321	0.433025	0.26663	0.174763	0.132832	1.31014	15.3384	0.318652	0.00761023	2.66663	0.056959	0.0127836	0.0697426	0.0697426	0.567321	0.433025	14.755	3405059	2600600	0.432679	0.433573
2007	50	SC Firm 50	1	US	1	MAN	3000	CGOODS	1	0.511304	0.31081	0.207975	0.101676	0.137804	1.64507	15.4886	0.324513	0.00536452	1.77857	-0.0131693	0.0419482	0.0287789	0.0287789	0.511304	0.31081	24.205	5621784	2535300	0.488696	0.40357
2008	50	SC Firm 50	1	US	1	MAN	3000	CGOODS	1	0.548751	0.503284	0.271324	0.236782	0.125452	1.09034	15.4764	0.341559	0.0146695	-0.291621	0.00282084	-0.05	-0.0471792	-0.0471792	0.548751	0.503284	10.885	2515140	2548400	0.451249	0.400022
2009	50	SC Firm 50	1	US	1	MAN	3000	CGOODS	1	0.527144	0.395207	0.270193	0.178316	0.0752172	1.33384	15.1922	0.309744	0.0301958	-2.77553	-0.00251486	0.0387829	0.036268	0.036268	0.527144	0.395207	16.61	3881344	2536300	0.472856	0.370744
2010	50	SC Firm 50	1	US	1	MAN	3000	CGOODS	1	0.572943	0.281408	0.332254	0.126821	0.135464	2.03599	15.5477	0.277696	0.0487516	2.53192	0.116364	-0.0485329	0.0678308	0.0678308	0.572943	0.281408	36.18	8127218	3182700	0.427057	0.380918
2011	50	SC Firm 50	1	US	1	MAN	3000	CGOODS	1	0.579079	0.332828	0.346372	0.161185	0.180059	1.73987	15.7777	0.279311	0.0301423	1.60145	0.0449434	-0.0695298	-0.0245863	-0.0245863	0.579079	0.332828	31.87	6916712	3450500	0.420921	0.376196
2012	50	SC Firm 50	1	US	1	MAN	3000	CGOODS	1	0.504437	0.280616	0.251746	0.114206	0.173197	1.79761	15.7873	0.27934	0.00315066	2.32108	-0.0346363	0.0254656	-0.00917073	-0.00917073	0.504437	0.280616	35.81	8277317	3228800	0.495563	0.351675
2013	50	SC Firm 50	1	US	1	MAN	3000	CGOODS	1	0.473486	0.204453	0.251331	0.0875391	0.174541	2.31586	15.8219	0.280382	0.0022255	2.21931	0.00669365	-0.0139222	-0.00722857	-0.00722857	0.473486	0.204453	55.91	12743726	3275100	0.526514	0.308486
2014	50	SC Firm 50	1	US	1	MAN	3000	CGOODS	1	0.493221	0.22271	0.267839	0.0972259	0.193165	2.21463	15.9324	0.289693	0.0114537	2.3882	0.0401079	-0.0717488	-0.0316408	-0.0316408	0.493221	0.22271	54.95	12442333	3565000	0.506779	0.314305
2004	51	SC Firm 51	1	US	0	SERV	4000	HCARE	1	0.664794	0.288568	0.503504	0.17178	0.181732	2.30377	16.7798	0.18942	0.0211405	3.78574	0.0844751	0.00670281	0.0911779	0.0911779	0.664794	0.288568	25.62	49882140	20233000	0.335206	0.324856
2005	51	SC Firm 51	1	US	0	SERV	4000	HCARE	1	0.601677	0.273497	0.434025	0.160454	0.173715	2.19994	16.7389	0.202324	0.007895	3.34522	-0.117386	0.00685905	-0.110527	-0.110527	0.601677	0.273497	22.98	44971860	16930000	0.398323	0.296219
2006	51	SC Firm 51	1	US	0	SERV	4000	HCARE	1	0.609345	0.231823	0.426661	0.125857	0.105533	2.6285	16.601	0.221818	0.0504966	2.66663	-0.0526295	-0.0233822	-0.0760117	-0.0760117	0.609345	0.231823	26.32	51639840	15584000	0.390655	0.318631
2007	51	SC Firm 51	1	US	0	SERV	4000	HCARE	1	0.59261	0.226894	0.372579	0.10699	0.136581	2.61184	16.5639	0.217928	0.025138	1.77857	-0.00848569	0.0252256	0.01674	0.01674	0.59261	0.226894	26.52	52350480	15364000	0.40739	0.35069
2008	51	SC Firm 51	1	US	0	SERV	4000	HCARE	1	0.584854	0.273121	0.355058	0.128034	0.156752	2.14137	16.6899	0.183307	0.0171412	-0.291621	0.063793	-0.0375772	0.0262158	0.0262158	0.584854	0.273121	23.25	45895500	17245000	0.415146	0.356305
2009	51	SC Firm 51	1	US	0	SERV	4000	HCARE	1	0.521317	0.272518	0.299991	0.128471	0.191725	1.91297	16.7498	0.163022	0.0281753	-2.77553	-0.0348297	-0.180889	-0.215719	-0.215719	0.521317	0.272518	25.25	43152250	16165000	0.478683	0.316176
2010	51	SC Firm 51	1	US	0	SERV	4000	HCARE	1	0.494369	0.254554	0.257349	0.107962	0.23391	1.94209	16.7851	0.150084	0.0290232	2.53192	-0.0258077	-0.000193075	-0.0260008	-0.0260008	0.494369	0.254554	26.48	44989520	15363000	0.505631	0.319153
2011	51	SC Firm 51	1	US	0	SERV	4000	HCARE	1	0.5128	0.221625	0.254755	0.0846457	0.235153	2.31381	16.8716	0.137125	0.000628793	1.60145	0.0468305	-0.032848	0.0139824	0.0139824	0.5128	0.221625	35.24	59379400	16907000	0.4872	0.3495
2012	51	SC Firm 51	1	US	0	SERV	4000	HCARE	1	0.609828	0.291831	0.345514	0.122183	0.156364	2.08966	16.6846	0.148564	0.0580148	2.32108	0.138842	-0.0479427	0.090899	0.090899	0.609828	0.291831	32.59	53121700	21891000	0.390172	0.414519
2013	51	SC Firm 51	1	US	0	SERV	4000	HCARE	1	0.605436	0.211287	0.353885	0.0872758	0.118652	2.86547	16.6119	0.118652	0.0312062	2.21931	0.0381944	0.0259639	0.0641584	0.0641584	0.605436	0.211287	53.15	87219150	23365000	0.394564	0.391221
2014	51	SC Firm 51	1	US	0	SERV	4000	HCARE	1	0.559928	0.162243	0.345265	0.0743013	0.137278	3.45117	16.5805	0.130878	0.0198228	2.3882	-0.132389	0.0010667	-0.131322	-0.131322	0.559928	0.162243	59.03	97576590	18897000	0.440072	0.327862
2004	52	SC Firm 52	1	US	1	MAN	9000	TECH	1	0.180917	0.0466536	0	0	0.155621	3.87787	14.6912	0.037133	0.129833	3.78574	-0.00198244	0.410394	0.408412	0.408412	0.180917	0.0466536	21.52	10668816	522096	0.819083	0.180917
2005	52	SC Firm 52	1	US	1	MAN	9000	TECH	1	0.163006	0.035783	0	0	0.1365	4.55541	14.7979	0.0257017	0.00396768	3.34522	0.0238623	0.109199	0.133061	0.133061	0.163006	0.035783	31.4333	16481155	611632	0.836994	0.163006
2006	52	SC Firm 52	1	US	1	MAN	9000	TECH	1	0.140482	0.0372314	0	0	0.0633381	3.77322	15.1151	0.0337722	0.0475199	2.66663	0.0150649	0.137808	0.152873	0.152873	0.140482	0.0372314	32.31	17716025	685100	0.859518	0.140482
2007	52	SC Firm 52	1	US	1	MAN	9000	TECH	1	0.165774	0.0540244	0	0	0.0343159	3.06849	15.1443	0.049978	0.021187	1.77857	0.0241712	-0.0772181	-0.0530469	-0.0530469	0.165774	0.0540244	26.14	14043924	802045	0.834226	0.165774
2008	52	SC Firm 52	1	US	1	MAN	9000	TECH	1	0.178955	0.0865396	0	0	0.117092	2.0679	15.3541	0.0534206	0.052207	-0.291621	-0.00360711	-0.14656	-0.150167	-0.150167	0.178955	0.0865396	16.97	8298635	786198	0.821045	0.178955
2009	52	SC Firm 52	1	US	1	MAN	9000	TECH	1	0.236516	0.0721494	0	0	0.0592551	3.27814	15.3174	0.0447252	0.0397122	-2.77553	0.0831784	0.0472457	0.130424	0.130424	0.236516	0.0721494	31.47	15595147	1212674	0.763484	0.240947
2010	52	SC Firm 52	1	US	1	MAN	9000	TECH	1	0.26221	0.0815477	0.106282	0.0288525	0.162508	3.21543	15.7351	0.0334844	0.075293	2.53192	0.109558	0.108807	0.218365	0.218365	0.26221	0.0815477	43.55	23460341	2083000	0.73779	0.178877
2011	52	SC Firm 52	1	US	1	MAN	9000	TECH	1	0.269801	0.132265	0.153392	0.0695462	0.136615	2.03985	15.8155	0.040708	0.021104	1.60145	0.0393805	-0.0206858	0.0186947	0.0186947	0.269801	0.132265	29.36	16001200	2439000	0.730199	0.14635
2012	52	SC Firm 52	1	US	1	MAN	9000	TECH	1	0.296574	0.149592	0.176778	0.0822264	0.103765	1.98256	15.8957	0.0432727	0.027831	2.32108	0.0789615	0.0503212	0.129283	0.129283	0.296574	0.149592	33.21	18896490	3324000	0.703426	0.149536
2013	52	SC Firm 52	1	US	1	MAN	9000	TECH	1	0.268726	0.152072	0.142245	0.0748748	0.119095	1.76709	15.9324	0.0515876	0.00579361	2.21931	-0.0204437	0.00852545	-0.0119182	-0.0119182	0.268726	0.152072	29.645	17223745	3089000	0.731274	0.1505
2014	52	SC Firm 52	1	US	1	MAN	9000	TECH	1	0.272873	0.115915	0.149423	0.057827	0.114345	2.35408	15.9471	0.041376	0.00917467	2.3882	0.0251784	0.00080186	0.0259803	0.0259803	0.272873	0.115915	43.33	25954670	3403000	0.727127	0.1465
2008	53	SC Firm 53	1	US	1	MAN	2000	IND	1	0.736801	0.413982	0.37522	0.131607	0.136858	1.77979	14.572	0.0291502	0.000577994	-0.291621	-0.0209274	0.0200452	-0.00088227	-0.00088227	0.736801	0.413982	12.54	2955420	2087800	0.263199	0.578734
2009	53	SC Firm 53	1	US	1	MAN	2000	IND	1	0.664036	0.443752	0.25798	0.123059	0.139691	1.49641	14.5445	0.0271741	0.0016751	-2.77553	-0.088406	0.000828918	-0.087577	-0.087577	0.664036	0.443752	22.56	2309594	1842500	0.335964	0.555592
2010	53	SC Firm 53	1	US	1	MAN	2000	IND	1	0.518892	0.27447	0.272949	0.116358	0.218179	1.89053	14.6081	0.0487071	0.0490105	2.53192	-0.250069	-0.102263	-0.352332	-0.352332	0.518892	0.27447	21.93	2461260	931100	0.481108	0.369594
2011	53	SC Firm 53	1	US	1	MAN	2000	IND	1	0.543803	0.258021	0.376409	0.149725	0.176996	2.10759	14.5888	0.043645	0.0343488	1.60145	0.0547794	-0.0472689	0.0075105	0.0075105	0.543803	0.258021	22.55	2977459	1035400	0.456197	0.305882
2012	53	SC Firm 53	1	US	1	MAN	2000	IND	1	0.5403	0.288033	0.364648	0.164963	0.195663	1.87583	14.6499	0.0397464	0.00862552	2.32108	0.0193701	0.000603743	0.0199738	0.0199738	0.5403	0.288033	22.88	2654496	1073900	0.4597	0.308261
2013	53	SC Firm 53	1	US	1	MAN	2000	IND	1	0.5604	0.26339	0.371538	0.142237	0.222773	2.12765	14.7037	0.0400852	0.0209312	2.21931	0.0282925	-0.075166	-0.0468735	-0.0468735	0.5604	0.26339	39.52	3163020	1131000	0.4396	0.335794
2014	53	SC Firm 53	1	US	1	MAN	2000	IND	1	0.532822	0.190105	0.338522	0.0952895	0.22093	2.80278	14.7547	0.040281	0.00669002	2.3882	0.0168788	-0.0117239	0.00515487	0.00515487	0.532822	0.190105	46.18	4975980	1168000	0.467178	0.322202
2010	54	SC Firm 54	1	US	1	MAN	9000	TECH	1	0.441745	0.354774	0.313573	0.240946	0.112059	1.24514	14.5532	0.147865	0.0139701	2.53192	-0.0775667	0.0409782	-0.0365885	-0.0365885	0.441745	0.354774	5.29	2929198	1610607	0.558255	0.186723
2011	54	SC Firm 54	1	US	1	MAN	9000	TECH	1	0.420276	0.419499	0.281584	0.280938	0.114196	1.00185	14.5798	0.153235	0.00176877	1.60145	-0.0432998	-0.0206881	-0.063988	-0.063988	0.420276	0.419499	5.19	2020579	1460170	0.579724	0.193053
2012	54	SC Firm 54	1	US	1	MAN	9000	TECH	1	0.375689	0.357158	0.211907	0.198881	0.131069	1.05189	14.621	0.144904	0.0159759	2.32108	-0.0320359	0.00739991	-0.024636	-0.024636	0.375689	0.357158	5.33	2421639	1345441	0.624311	0.207821
2004	55	SC Firm 55	1	US	0	SERV	4000	HCARE	1	0.415215	0.299652	0.155371	0.0997868	0.0478943	1.38566	12.7855	0.228746	0.0124204	3.78574	0.0152524	0.0610421	0.0762945	0.0762945	0.415215	0.299652	4.03	360566	154272	0.584785	0.307643
2005	55	SC Firm 55	1	US	0	SERV	4000	HCARE	1	0.458489	0.307976	0.131169	0.0735203	0.0765316	1.48871	12.8273	0.20138	0.0248756	3.34522	0.094332	-0.0213482	0.0729838	0.0729838	0.458489	0.307976	4.86	436447	194235	0.541511	0.376736
2006	55	SC Firm 55	1	US	0	SERV	4000	HCARE	1	0.558006	0.238865	0.189342	0.0548743	0.318338	2.33607	13.6546	0.208568	0.129833	2.66663	0.10962	-0.130249	-0.0206285	-0.0206285	0.558006	0.238865	7.51	770234	241721	0.441994	0.454771
2007	55	SC Firm 55	1	US	0	SERV	4000	HCARE	1	0.515526	0.324584	0.0650766	0.0304777	0.131991	1.58827	13.8474	0.158389	0.104379	1.77857	0.331105	0.136111	0.467216	0.467216	0.515526	0.324584	13.3	1406040	675700	0.484474	0.481804
2008	55	SC Firm 55	1	US	0	SERV	4000	HCARE	1	0.701783	0.541682	0.402012	0.252415	0.130789	1.29556	13.9173	0.198244	0.00435748	-0.291621	0.0964794	-0.172086	-0.0756069	-0.0756069	0.701783	0.541682	4.04	662836	783400	0.298217	0.520111
2009	55	SC Firm 55	1	US	0	SERV	4000	HCARE	1	0.622622	0.269115	0.237373	0.0649522	0.142284	2.31359	13.9239	0.190566	0.00877364	-2.77553	-0.0456368	0.0241406	-0.0214962	-0.0214962	0.622622	0.269115	12.06	1982319	729900	0.377378	0.526657
2010	55	SC Firm 55	1	US	0	SERV	4000	HCARE	1	0.64931	0.268411	0.356424	0.0988894	0.1275	2.41909	14.0816	0.150794	0.00901037	2.53192	0.178346	0.00367789	0.182023	0.182023	0.64931	0.268411	16.6	2742805	1006300	0.35069	0.467222
2011	55	SC Firm 55	1	US	0	SERV	4000	HCARE	1	0.622742	0.340828	0.319591	0.128257	0.124934	1.82714	14.3173	0.145571	0.00721206	1.60145	0.0344344	0.00555393	0.0399883	0.0399883	0.622742	0.340828	12.42	2060129	1065200	0.377258	0.459456
2012	55	SC Firm 55	1	US	0	SERV	4000	HCARE	1	0.612853	0.30946	0.319348	0.11725	0.129983	1.98039	14.3985	0.152769	0.00292696	2.32108	0.0390541	-0.00220858	0.0368455	0.0368455	0.612853	0.30946	15.2379	2538702	1137700	0.387147	0.437729
2013	55	SC Firm 55	1	US	0	SERV	4000	HCARE	1	0.563094	0.252581	0.290104	0.0967819	0.116683	2.22936	14.4249	0.150631	0.00869368	2.21931	-0.00910325	0.0351557	0.0260524	0.0260524	0.563094	0.252581	19.77	3313041	1119600	0.436906	0.395916
2014	55	SC Firm 55	1	US	0	SERV	4000	HCARE	1	0.57974	0.246398	0.311759	0.0969545	0.104354	2.35286	14.4082	0.134009	0.00955445	2.3882	-0.0206456	-0.0759867	-0.0966323	-0.0966323	0.57974	0.246398	19.62	3306511	1081100	0.42026	0.398917
2004	56	SC Firm 56	1	US	1	MAN	3000	CGOODS	1	0.564559	0.338603	0.280845	0.133601	0.126173	1.66732	15.4365	0.201638	0.0158652	3.78574	0.0786628	0.0437834	0.122446	0.122446	0.564559	0.338603	49.5	4793036	2453800	0.435441	0.435993
2005	56	SC Firm 56	1	US	1	MAN	3000	CGOODS	1	0.539911	0.390815	0.254218	0.15708	0.135237	1.3815	15.5395	0.206275	0.00748366	3.34522	0.00895813	-0.0204263	-0.0114681	-0.0114681	0.539911	0.390815	40.66	3889414	2495200	0.460089	0.414995
2006	56	SC Firm 56	1	US	1	MAN	3000	CGOODS	1	0.560007	0.462301	0.27059	0.200383	0.117453	1.21135	15.5498	0.228052	0.0152435	2.66663	-0.000674112	-0.0555243	-0.0561985	-0.0561985	0.560007	0.462301	31.9	2898657	2492200	0.439993	0.416174
2007	56	SC Firm 56	1	US	1	MAN	3000	CGOODS	1	0.563588	0.622673	0.276525	0.328143	0.0857156	0.905111	15.5509	0.241158	0.0250305	1.77857	-0.00728422	-0.0276251	-0.0349093	-0.0349093	0.563588	0.622673	17.05	1490954	2460400	0.436412	0.399601
2004	57	SC Firm 57	1	US	0	SERV	4000	HCARE	1	0.319795	0.0875408	0.0997958	0.0221218	0.207357	3.6531	14.32	0.129809	0.00709641	3.78574	-0.00189139	0.0826241	0.0807327	0.0807327	0.319795	0.0875408	63.98	6696934	642500	0.680205	0.247623
2005	57	SC Firm 57	1	US	0	SERV	4000	HCARE	1	0.318944	0.0953411	0.163414	0.0421073	0.221178	3.3453	14.3856	0.136829	0.0103296	3.34522	0.0353549	0.0214071	0.056762	0.056762	0.318944	0.0953411	65.92	6856504	722600	0.681056	0.188957
2006	57	SC Firm 57	1	US	0	SERV	4000	HCARE	1	0.24473	0.0611336	0.0805132	0.0172916	0.228526	4.00321	14.4984	0.150492	0.00190689	2.66663	-0.0725891	0.0597664	-0.0128228	-0.0128228	0.24473	0.0611336	82.97	8558807	557300	0.75527	0.188214
2007	57	SC Firm 57	1	US	0	SERV	4000	HCARE	1	0.245324	0.0600965	0.0745988	0.0156083	0.257645	4.08217	14.6049	0.139204	0.0202945	1.77857	0.0201979	0.0883862	0.108584	0.108584	0.245324	0.0600965	94.8	9498118	607300	0.754676	0.192648
2008	57	SC Firm 57	1	US	0	SERV	4000	HCARE	1	0.249465	0.0735631	0.0696582	0.0175726	0.256255	3.39118	14.7125	0.12507	0.00281471	-0.291621	0.0216453	0.00322617	0.0248715	0.0248715	0.249465	0.0735631	84.26	8374856	665000	0.750535	0.202086
2009	57	SC Firm 57	1	US	0	SERV	4000	HCARE	1	0.238501	0.0849087	0.0633833	0.0196543	0.273487	2.80892	14.7457	0.114589	0.0162531	-2.77553	0.00973546	0.0549383	0.0646737	0.0646737	0.238501	0.0849087	77.9	7471942	693300	0.761499	0.193849
2010	57	SC Firm 57	1	US	0	SERV	4000	HCARE	1	0.480845	0.163574	0.372499	0.111379	0.27044	2.93963	14.8162	0.10339	0.00311343	2.53192	0.262242	0.0145988	0.276841	0.276841	0.480845	0.163574	91.77	7798026	1525000	0.519155	0.177392
2011	57	SC Firm 57	1	US	0	SERV	4000	HCARE	1	0.545276	0.228731	0.404279	0.143716	0.237142	2.38392	14.879	0.0904004	0.0216979	1.60145	0.157374	0.049448	0.206822	0.206822	0.545276	0.228731	85.5	7228455	2143700	0.454724	0.240881
2012	57	SC Firm 57	1	US	0	SERV	4000	HCARE	1	0.529858	0.215971	0.419362	0.150042	0.22735	2.45338	14.9001	0.0865512	0.0109849	2.32108	0.0134657	0.037964	0.0514297	0.0514297	0.529858	0.215971	97.74	7985105	2199600	0.470142	0.196565
2013	57	SC Firm 57	1	US	0	SERV	4000	HCARE	1	0.553649	0.212037	0.384512	0.119355	0.158063	2.6111	14.9305	0.0776021	0.0463126	2.21931	0.117316	0.081629	0.198945	0.198945	0.553649	0.212037	133.94	10371813	2791000	0.446351	0.306917
2014	57	SC Firm 57	1	US	0	SERV	4000	HCARE	1	0.616934	0.201132	0.43137	0.10602	0.188509	3.0673	15.0166	0.0876566	0.0178902	2.3882	0.0688843	0.0257432	0.0946275	0.0946275	0.616934	0.201132	166.62	12478752	3141800	0.383066	0.354986
2004	58	SC Firm 58	1	US	1	MAN	2000	IND	1	0.425504	0.0885608	0.0825281	0.011663	0.215444	4.80465	15.2837	0.0473047	0.00868495	3.78574	0.0651784	0.00782181	0.0730002	0.0730002	0.425504	0.0885608	27.76	4732525	459840	0.574496	0.373827
2005	58	SC Firm 58	1	US	1	MAN	2000	IND	1	0.440861	0.0875826	0.0748813	0.00975797	0.245838	5.03366	15.554	0.0435255	0.0196613	3.34522	0.111243	0.0122116	0.123454	0.123454	0.440861	0.0875826	37.03	6407264	615031	0.559139	0.395603
2006	58	SC Firm 58	1	US	1	MAN	2000	IND	1	0.42163	0.0887943	0.070547	0.0100441	0.271218	4.74839	15.6959	0.0502981	0.0156564	2.66663	0.044702	-0.00229639	0.0424056	0.0424056	0.42163	0.0887943	40.89	7059945	687971	0.57837	0.377731
2007	58	SC Firm 58	1	US	1	MAN	2000	IND	1	0.424587	0.0767987	0.0774043	0.0093699	0.296407	5.52857	15.8056	0.056128	0.0178965	1.77857	0.0447671	-0.0532511	-0.00848393	-0.00848393	0.424587	0.0767987	54.12	9244887	769058	0.575413	0.376311
2008	58	SC Firm 58	1	US	1	MAN	2000	IND	1	0.390203	0.0702344	0.0701966	0.0088337	0.329618	5.55573	15.9648	0.057326	0.0236232	-0.291621	-0.033352	-0.0768246	-0.110177	-0.110177	0.390203	0.0702344	55.03	9379148	708500	0.609797	0.344166
2009	58	SC Firm 58	1	US	1	MAN	2000	IND	1	0.411257	0.0713803	0.0667653	0.007811	0.333308	5.7615	15.8407	0.0641674	0.00284991	-2.77553	0.0249955	-0.121139	-0.0961435	-0.0961435	0.411257	0.0713803	58.73	9813666	754348	0.588743	0.369138
2010	58	SC Firm 58	1	US	1	MAN	2000	IND	1	0.396669	0.0561161	0.0471643	0.00445608	0.324789	7.06871	16.0428	0.0572897	0.00475712	2.53192	0.0186817	-0.0438132	-0.0251315	-0.0251315	0.396669	0.0561161	80.19	13315389	791631	0.603331	0.366804
2011	58	SC Firm 58	1	US	1	MAN	2000	IND	1	0.415673	0.0722915	0.0473258	0.00541224	0.336779	5.74995	16.1512	0.0593207	0.0084153	1.60145	0.0454126	-0.0869357	-0.0415231	-0.0415231	0.415673	0.0722915	69.78	11404913	888725	0.584327	0.387039
2012	58	SC Firm 58	1	US	1	MAN	2000	IND	1	0.447446	0.109548	0.171906	0.030574	0.254405	4.08449	16.2455	0.0534376	0.0588171	2.32108	0.130523	-0.0260421	0.104481	0.104481	0.447446	0.109548	63.22	10199093	1254740	0.552554	0.348828
2013	58	SC Firm 58	1	US	1	MAN	2000	IND	1	0.639526	0.169799	0.483058	0.0972503	0.263768	3.76638	16.3612	0.0573362	0.00193473	2.21931	0.191855	-0.208	-0.0161448	-0.0161448	0.639526	0.169799	58.35	8763995	1792476	0.360474	0.327876
2014	58	SC Firm 58	1	US	1	MAN	2000	IND	1	0.653435	0.160718	0.515152	0.097401	0.250573	4.06572	16.416	0.0474347	0.00758095	2.3882	0.0957852	-0.0407773	0.0550079	0.0550079	0.653435	0.160718	74.89	10968240	2100362	0.346565	0.306042
2004	59	SC Firm 59	1	US	1	MAN	9000	TECH	1	0.541155	0.279374	0.335156	0.142153	0.0859073	1.93703	15.0917	0.0545806	0.0137186	3.78574	0.0689716	0.0183398	0.0873113	0.0873113	0.541155	0.279374	28.19	15907347	6167000	0.458845	0.326255
2005	59	SC Firm 59	1	US	1	MAN	9000	TECH	1	0.543726	0.26883	0.279928	0.107097	0.0764259	2.02257	15.1431	0.0602662	0.00666096	3.34522	-0.0424905	-0.0470532	-0.0895437	-0.0895437	0.543726	0.26883	22.65	15557403	5720000	0.456274	0.370722
2006	59	SC Firm 59	1	US	1	MAN	9000	TECH	1	0.655639	0.356881	0.394411	0.15954	0.0756273	1.83714	15.1875	0.0407224	0.00781103	2.66663	0.158982	-0.0718937	0.0870887	0.0870887	0.655639	0.356881	24.95	13607329	7551000	0.344361	0.458453
2007	59	SC Firm 59	1	US	1	MAN	9000	TECH	1	0.667489	0.40622	0.397782	0.183745	0.111007	1.64317	15.2688	0.0421912	0.0397691	1.77857	0.0251786	-0.0413406	-0.016162	-0.016162	0.667489	0.40622	18.53	11470107	7847000	0.332511	0.464869
2008	59	SC Firm 59	1	US	1	MAN	9000	TECH	1	0.599858	0.42678	0.297846	0.174013	0.139845	1.40554	15.2357	0.0393203	0.0167306	-0.291621	-0.0982119	0.00791745	-0.0902945	-0.0902945	0.599858	0.42678	22.46	9056692	6743000	0.400142	0.44222
2009	59	SC Firm 59	1	US	1	MAN	9000	TECH	1	0.568977	0.3613	0.231669	0.114425	0.133159	1.5748	15.257	0.0380215	0.00580369	-2.77553	0.00176649	-0.00521534	-0.00344886	-0.00344886	0.568977	0.3613	24.44	11957261	6764000	0.431023	0.450538
2010	59	SC Firm 59	1	US	1	MAN	9000	TECH	1	0.54213	0.356545	0.214375	0.11324	0.132109	1.52051	15.3037	0.0352022	0.0049625	2.53192	-0.00273884	-0.0149025	-0.0176414	-0.0176414	0.54213	0.356545	20.215	12145604	6730000	0.45787	0.422346
2011	59	SC Firm 59	1	US	1	MAN	9000	TECH	1	0.54647	0.337868	0.209272	0.100784	0.135701	1.6174	15.3797	0.0321747	0.00992309	1.60145	-0.0145036	-0.0835209	-0.0980245	-0.0980245	0.54647	0.337868	21.98	12848007	6556000	0.45353	0.430108
2012	59	SC Firm 59	1	US	1	MAN	9000	TECH	1	0.528227	0.356112	0.187937	0.102589	0.149132	1.48332	15.3205	0.0263225	0.00400735	2.32108	-0.026661	-0.0303851	-0.0570461	-0.0570461	0.528227	0.356112	33.65	11284395	6241000	0.471773	0.429539
2013	59	SC Firm 59	1	US	1	MAN	9000	TECH	1	0.530875	0.31941	0.238552	0.114988	0.150965	1.66205	15.2998	0.0245506	0.00458425	2.21931	0.0114847	-0.0331225	-0.0216378	-0.0216378	0.530875	0.31941	30.45	13592180	6379000	0.469125	0.389481
2014	59	SC Firm 59	1	US	1	MAN	9000	TECH	1	0.48356	0.272106	0.182172	0.0816696	0.144093	1.7771	15.2652	0.0229529	0.00632874	2.3882	-0.0974588	-0.0337007	-0.131159	-0.131159	0.48356	0.272106	28.56	14201744	5309000	0.51644	0.37262
2004	60	SC Firm 60	1	US	1	MAN	1	OILGAS	1	0.419436	0.261518	0.277481	0.158426	0.229342	1.60385	13.1814	0.820906	0.00377186	3.78574	0.022308	0.0377503	0.0600583	0.0600583	0.419436	0.261518	3.6875	1434271	507918	0.580564	0.400753
2005	60	SC Firm 60	1	US	1	MAN	1	OILGAS	1	0.405102	0.216643	0.276514	0.134365	0.254172	1.86991	13.434	0.827926	0.026616	3.34522	0.065442	0.0303082	0.0957502	0.0957502	0.405102	0.216643	5.6375	2190423	605778	0.594898	0.371252
2006	60	SC Firm 60	1	US	1	MAN	1	OILGAS	1	0.295375	0.156629	0.156594	0.0760053	0.240343	1.88583	13.5437	0.806873	0.0082062	2.66663	-0.0348407	0.0488484	0.0140077	0.0140077	0.295375	0.156629	7.58125	2917675	541863	0.704625	0.353936
2007	60	SC Firm 60	1	US	1	MAN	1	OILGAS	1	0.302593	0.142256	0.188763	0.0816777	0.198836	2.1271	13.5038	0.884691	0.0268305	1.77857	0.0513599	0.0254073	0.0767673	0.0767673	0.302593	0.142256	10.0925	3935137	652637	0.697407	0.341503
2008	60	SC Firm 60	1	US	1	MAN	1	OILGAS	1	0.354434	0.328054	0.266223	0.243927	0.157113	1.08041	13.7598	0.84714	0.0177251	-0.291621	0.178125	0.185395	0.36352	0.36352	0.354434	0.328054	6.5	2687336	1311996	0.645566	0.282063
2009	60	SC Firm 60	1	US	1	MAN	1	OILGAS	1	0.332868	0.213441	0.246757	0.151222	0.150528	1.55953	13.7024	0.885766	0.0174744	-2.77553	-0.0233236	-0.0185329	-0.0418564	-0.0418564	0.332868	0.213441	10.8975	4518289	1226086	0.667132	0.289376
2010	60	SC Firm 60	1	US	1	MAN	1	OILGAS	1	0.353899	0.264729	0.273672	0.198506	0.134736	1.33684	13.6683	0.885766	0.0206796	2.53192	0.0477629	0.00984237	0.0576053	0.0576053	0.353899	0.264729	9.4625	3936698	1417378	0.646101	0.288969
2011	60	SC Firm 60	1	US	1	MAN	1	OILGAS	1	0.328786	0.152459	0.246282	0.10714	0.137476	2.15655	13.7952	0.885766	0.00366854	1.60145	0.00155951	0.0484376	0.0499971	0.0499971	0.328786	0.152459	18.975	7916941	1424133	0.671214	0.294754
2012	60	SC Firm 60	1	US	1	MAN	1	OILGAS	1	0.347072	0.132975	0.26505	0.0942459	0.153132	2.61006	14.0016	0.885766	0.00205739	2.32108	0.0385721	-0.00177934	0.0367928	0.0367928	0.347072	0.132975	24.87	10446660	1602194	0.652928	0.30281
2013	60	SC Firm 60	1	US	1	MAN	1	OILGAS	1	0.343011	0.0957282	0.259531	0.0663522	0.236933	3.58318	14.373	0.885766	0.0359783	2.21931	0.0213552	0.000773728	0.0221289	0.0221289	0.343011	0.0957282	38.76	16139529	1708566	0.656989	0.327133
2014	60	SC Firm 60	1	US	1	MAN	1	OILGAS	1	0.45076	0.166961	0.369729	0.125308	0.273972	2.69979	14.5916	0.885766	0.0363307	2.3882	0.136554	-0.06567	0.0708838	0.0708838	0.45076	0.166961	29.61	12229599	2451107	0.54924	0.283756
2006	61	SC Firm 61	1	US	1	MAN	9000	TECH	1	0.432044	0.232011	0.27946	0.13347	0.107996	1.86217	14.2102	0.10299	0.012145	2.66663	-0.0200873	-0.00927292	-0.0293602	-0.0293602	0.432044	0.232011	17.91	4923674	1487451	0.567956	0.286145
2007	61	SC Firm 61	1	US	1	MAN	9000	TECH	1	0.395559	0.269818	0.23789	0.149844	0.113505	1.46602	14.2949	0.0876905	0.0106413	1.77857	0.0113191	0.0141643	0.0254834	0.0254834	0.395559	0.269818	17.01	4143927	1531269	0.604441	0.274001
2008	61	SC Firm 61	1	US	1	MAN	9000	TECH	1	0.717396	0.428209	0.467373	0.205635	-0.00759352	1.67534	13.8534	0.21124	0.115403	-0.291621	-0.194154	0.0666564	-0.127497	-0.127497	0.717396	0.428209	5.99	1609208	1205119	0.282604	0.64087
2009	61	SC Firm 61	1	US	1	MAN	9000	TECH	1	0.700852	0.309426	0.508181	0.165007	-0.00156601	2.26501	13.6561	0.220831	0.0127202	-2.77553	-0.153486	0.220152	0.0666659	0.0666659	0.700852	0.309426	8.26	2206378	988613	0.299148	0.614072
2004	62	SC Firm 62	1	US	1	MAN	1	OILGAS	1	0.461628	0.275591	0.268507	0.140051	0.0984078	1.67505	14.554	0.203125	0.0182838	3.78574	0.0551181	-0.00362922	0.0514889	0.0514889	0.461628	0.275591	13.4525	2859346	1087795	0.538372	0.281149
2005	62	SC Firm 62	1	US	1	MAN	1	OILGAS	1	0.472706	0.234288	0.216287	0.0860844	0.109285	2.01763	14.7389	0.169664	0.0148731	3.34522	0.121642	0.0626378	0.18428	0.18428	0.472706	0.234288	20.7	4787045	1464710	0.527294	0.339801
2006	62	SC Firm 62	1	US	1	MAN	1	OILGAS	1	0.578995	0.297199	0.34217	0.137886	0.140957	1.94818	15.1354	0.14912	0.0234315	2.66663	0.242338	-0.0275771	0.214761	0.214761	0.578995	0.297199	26.525	5956965	2519063	0.421005	0.380752
2007	62	SC Firm 62	1	US	1	MAN	1	OILGAS	1	0.542656	0.196571	0.258404	0.0670327	0.178942	2.76062	15.3559	0.173565	0.0269239	1.77857	0.0101771	-0.0346538	-0.0244767	-0.0244767	0.542656	0.196571	48.13	10492763	2567209	0.457344	0.397809
2008	62	SC Firm 62	1	US	1	MAN	1	OILGAS	1	0.585984	0.437533	0.360894	0.236845	0.178344	1.33929	15.5818	0.157843	0.000179613	-0.291621	0.151039	-0.0462568	0.104782	0.104782	0.585984	0.437533	20.5	4446301	3458695	0.414016	0.368994
2009	62	SC Firm 62	1	US	1	MAN	1	OILGAS	1	0.476693	0.26476	0.236817	0.109263	0.125242	1.80047	15.4686	0.154349	0.0360579	-2.77553	0.0289873	0.145436	0.174423	0.174423	0.476693	0.26476	41.8	10226692	3682633	0.523307	0.33023
2010	62	SC Firm 62	1	US	1	MAN	1	OILGAS	1	0.439345	0.221324	0.223633	0.0945959	0.132428	1.98508	15.6295	0.155876	0.00160617	2.53192	-0.0206909	-0.0146791	-0.0353701	-0.0353701	0.439345	0.221324	50.73	12373749	3517000	0.560655	0.289803
2011	62	SC Firm 62	1	US	1	MAN	1	OILGAS	1	0.477456	0.270119	0.244693	0.115996	0.111614	1.76758	15.7555	0.160238	0.0125147	1.60145	0.101776	-0.0126152	0.0891612	0.0891612	0.477456	0.270119	49.19	12077723	4469800	0.522544	0.327878
2012	62	SC Firm 62	1	US	1	MAN	1	OILGAS	1	0.489362	0.281626	0.26707	0.129725	0.109516	1.73763	15.869	0.158189	0.00203857	2.32108	0.0887778	0.00496496	0.0937427	0.0937427	0.489362	0.281626	56.46	13928464	5460400	0.510638	0.315096
2013	62	SC Firm 62	1	US	1	MAN	1	OILGAS	1	0.569865	0.381192	0.318167	0.178286	0.0948839	1.49496	16.028	0.142957	0.00981866	2.21931	0.186652	-0.0188154	0.167836	0.167836	0.569865	0.381192	59.53	13181627	8120000	0.430135	0.388589
2014	62	SC Firm 62	1	US	1	MAN	1	OILGAS	1	0.63171	0.455408	0.393614	0.240389	0.125116	1.38713	16.1555	0.152343	0.017264	2.3882	0.00186162	-0.170028	-0.168166	-0.168166	0.63171	0.455408	49.95	9738874	8144000	0.36829	0.407617
2004	63	SC Firm 63	1	US	1	MAN	3000	CGOODS	1	0.819326	0.343752	0.735468	0.243082	0.195206	2.38348	15.7116	0.284794	0.0132098	3.78574	-0.0155805	0.0278652	0.0122846	0.0122846	0.819326	0.343752	29.89	10440720	5469000	0.180674	0.366742
2005	63	SC Firm 63	1	US	1	MAN	3000	CGOODS	1	0.762102	0.290916	0.649946	0.192108	0.208235	2.61966	15.7717	0.293241	0.00541606	3.34522	-0.0450118	-0.00309917	-0.048111	-0.048111	0.762102	0.290916	29.77	12586800	5164000	0.237898	0.370868
2006	63	SC Firm 63	1	US	1	MAN	3000	CGOODS	1	0.717624	0.273261	0.595	0.178554	0.178567	2.62615	15.7462	0.252292	0.017975	2.66663	0.0508715	0.0135571	0.0644287	0.0644287	0.717624	0.273261	38.89	14781540	5558000	0.282376	0.356875
2007	63	SC Firm 63	1	US	1	MAN	3000	CGOODS	1	0.744143	0.243705	0.61811	0.152058	0.231342	3.05346	15.815	0.316835	0.0323801	1.77857	-0.118231	-0.167727	-0.285958	-0.285958	0.744143	0.243705	35.73	14883530	4796000	0.255857	0.38495
2008	63	SC Firm 63	1	US	1	MAN	3000	CGOODS	1	0.741736	0.273391	0.611885	0.171184	0.2422	2.7131	15.8947	0.299506	0.00661501	-0.291621	0.000926784	-0.124189	-0.123262	-0.123262	0.741736	0.273391	30.01	12762600	4802000	0.258264	0.389249
2009	63	SC Firm 63	1	US	1	MAN	3000	CGOODS	1	0.840654	0.323561	0.731123	0.19778	0.249174	2.59813	15.8418	0.326453	0.00160465	-2.77553	0.0477213	-0.179326	-0.131605	-0.131605	0.840654	0.323561	33.8	10643290	5091000	0.159346	0.446499
2010	63	SC Firm 63	1	US	1	MAN	3000	CGOODS	1	0.811345	0.296833	0.701312	0.187301	0.256851	2.73333	15.8536	0.326801	0.0157968	2.53192	0.000159337	-0.0403123	-0.040153	-0.040153	0.811345	0.296833	34.75	12062400	5092000	0.188655	0.409496
2011	63	SC Firm 63	1	US	1	MAN	3000	CGOODS	1	0.787963	0.338297	0.679445	0.225769	0.223987	2.3292	15.7816	0.30647	0.0222662	1.60145	0.045905	-0.0224424	0.0234625	0.0234625	0.787963	0.338297	33.24	10576000	5407000	0.212037	0.392014
2012	63	SC Firm 63	1	US	1	MAN	3000	CGOODS	1	0.816845	0.340451	0.69995	0.212597	0.218377	2.3993	15.7861	0.325727	0.0050307	2.32108	-0.0111792	-0.100766	-0.111945	-0.111945	0.816845	0.340451	34.89	10333440	5334000	0.183155	0.435222
2004	64	SC Firm 64	1	US	0	SERV	5000	CSERV	1	0.57111	0.28791	0.287342	0.109071	0.122378	1.98364	17.9825	0.110627	0.00591295	3.78574	0.113341	-0.0440262	0.069315	0.069315	0.57111	0.28791	41.7543	30184545	12204100	0.42889	0.453809
2005	64	SC Firm 64	1	US	0	SERV	5000	CSERV	1	0.559689	0.332468	0.21463	0.0967227	0.101048	1.68344	18.1014	0.111964	0.0151522	3.34522	0.000847139	-0.0245258	-0.0236787	-0.0236787	0.559689	0.332468	49.3656	24540596	12222600	0.440311	0.486185
2006	64	SC Firm 64	1	US	0	SERV	5000	CSERV	1	0.604725	0.349054	0.231332	0.0954188	0.0937768	1.73247	18.1933	0.0642248	0.00445629	2.66663	0.0831338	-0.0528863	0.0302476	0.0302476	0.604725	0.349054	46.2636	26426764	14170700	0.395275	0.518706
2007	64	SC Firm 64	1	US	0	SERV	5000	CSERV	1	0.644257	0.364544	0.296607	0.117835	0.101119	1.76729	18.2786	0.071133	0.0046277	1.77857	0.0322323	-0.121155	-0.0889228	-0.0889228	0.644257	0.364544	41.4671	26002584	14917000	0.355743	0.531386
2008	64	SC Firm 64	1	US	0	SERV	5000	CSERV	1	0.600264	0.433156	0.290964	0.172751	0.0702613	1.38579	18.2861	0.0730973	0.0188949	-0.291621	-0.0359047	0.326678	0.290773	0.290773	0.600264	0.433156	24.751	18419218	14075100	0.399736	0.505553
2004	65	SC Firm 65	1	US	1	MAN	2000	IND	1	0.534727	0.285825	0.312948	0.136903	0.148016	1.87082	14.5086	0.257165	0.00783563	3.78574	-0.000190509	0.00992845	0.00973794	0.00973794	0.534727	0.285825	32.46	2005796	802754	0.465273	0.322798
2005	65	SC Firm 65	1	US	1	MAN	2000	IND	1	0.533797	0.284845	0.317953	0.139537	0.179514	1.87399	14.6012	0.275797	0.0198982	3.34522	0.0212991	-0.0287323	-0.00743318	-0.00743318	0.533797	0.284845	34.575	2099219	836116	0.466203	0.316465
2006	65	SC Firm 65	1	US	1	MAN	2000	IND	1	0.492775	0.280385	0.30591	0.150209	0.164177	1.7575	14.628	0.240409	0.00759134	2.66663	0.0543489	0.0148347	0.0691836	0.0691836	0.492775	0.280385	39.25	2411933	939764	0.507225	0.269222
2007	65	SC Firm 65	1	US	1	MAN	2000	IND	1	0.385207	0.254497	0.208147	0.125275	0.190718	1.5136	14.7643	0.233256	0.0175094	1.77857	-0.087321	0.0384629	-0.0488581	-0.0488581	0.385207	0.254497	37.03	2244154	766100	0.614793	0.275794
2008	65	SC Firm 65	1	US	1	MAN	2000	IND	1	0.428441	0.415137	0.252269	0.242118	0.144323	1.03205	14.8679	0.247266	0.0328791	-0.291621	0.0593959	-0.0264464	0.0329496	0.0329496	0.428441	0.415137	20.7	1253024	889400	0.571559	0.280119
2009	65	SC Firm 65	1	US	1	MAN	2000	IND	1	0.30944	0.221834	0.105623	0.0698803	0.14691	1.39492	14.63	0.253122	0.000396553	-2.77553	-0.155217	0.0153075	-0.139909	-0.139909	0.30944	0.221834	34.26	2077720	592300	0.69056	0.281803
2010	65	SC Firm 65	1	US	1	MAN	2000	IND	1	0.399051	0.293897	0.237739	0.163526	0.111564	1.35779	14.7428	0.211504	0.0201569	2.53192	0.164894	0.0368848	0.201779	0.201779	0.399051	0.293897	39.74	2425131	1009400	0.600949	0.282546
2011	65	SC Firm 65	1	US	1	MAN	2000	IND	1	0.441059	0.336269	0.302985	0.218193	0.113292	1.31163	14.7288	0.17977	0.00149138	1.60145	0.119379	0.0309124	0.150292	0.150292	0.441059	0.336269	44.3	2731751	1384000	0.558941	0.278976
2012	65	SC Firm 65	1	US	1	MAN	2000	IND	1	0.425332	0.283888	0.274652	0.168614	0.139704	1.49824	14.8633	0.134556	0.0170517	2.32108	0.0250195	0.0030949	0.0281144	0.0281144	0.425332	0.283888	58.76	3709360	1470500	0.574668	0.265207
2013	65	SC Firm 65	1	US	1	MAN	2000	IND	1	0.380561	0.20823	0.257659	0.12936	0.138305	1.8276	14.8949	0.142342	0.00259203	2.21931	-0.0404237	0.0059834	-0.0344403	-0.0344403	0.380561	0.20823	79.4	5054507	1329300	0.619439	0.216404
2014	65	SC Firm 65	1	US	1	MAN	2000	IND	1	0.361375	0.188757	0.238017	0.113821	0.13651	1.9145	14.9799	0.145609	0.00222294	2.3882	0.00771543	0.0123979	0.0201133	0.0201133	0.361375	0.188757	90.24	5837721	1358300	0.638625	0.213877
2005	66	SC Firm 66	1	US	1	MAN	1000	BMAT	1	0.445567	0.363322	0.266992	0.205492	0.148361	1.22637	14.0887	0.34426	0.0466794	3.34522	-0.0035684	0.0477803	0.0442119	0.0442119	0.445567	0.363322	35.235	1290980	736700	0.554433	0.360046
2006	66	SC Firm 66	1	US	1	MAN	1000	BMAT	1	0.398644	0.203432	0.226951	0.101609	0.1802	1.95959	14.1975	0.286615	0.0264539	2.66663	0.00842206	0.0123418	0.0207638	0.0207638	0.398644	0.203432	51.26	2946914	752600	0.601356	0.32221
2007	66	SC Firm 66	1	US	1	MAN	1000	BMAT	1	0.402083	0.193081	0.215493	0.0890375	0.174903	2.08245	14.4247	0.265291	0.00321687	1.77857	0.0305573	-0.0620033	-0.0314459	-0.0314459	0.402083	0.193081	75.17	3403928	814500	0.597917	0.308683
2008	66	SC Firm 66	1	US	1	MAN	1000	BMAT	1	0.453977	0.282197	0.242751	0.131629	0.200152	1.60873	14.4851	0.340965	0.0145762	-0.291621	-0.0217264	-0.208	-0.229727	-0.229727	0.453977	0.282197	20.54	1977160	777300	0.546023	0.334832
2009	66	SC Firm 66	1	US	1	MAN	1000	BMAT	1	0.586884	0.48957	0.310522	0.233169	0.0842126	1.19877	14.1247	0.423467	0.0865902	-2.77553	0.0677842	-0.208	-0.140216	-0.140216	0.586884	0.48957	26.95	916244	878800	0.413116	0.401897
2010	66	SC Firm 66	1	US	1	MAN	1000	BMAT	1	0.637822	0.411619	0.311645	0.152433	0.0447196	1.54954	13.9967	0.390033	0.0294356	2.53192	0.0827438	-0.00972713	0.0730167	0.0730167	0.637822	0.411619	40.24	1443439	1009800	0.362178	0.47385
2011	66	SC Firm 66	1	US	1	MAN	1000	BMAT	1	0.591345	0.316468	0.384173	0.166387	0.0833375	1.86857	14.3314	0.332798	0.030096	1.60145	0.0843918	0.10126	0.185652	0.185652	0.591345	0.316468	51.48	2544114	1177900	0.408655	0.360661
2012	66	SC Firm 66	1	US	1	MAN	1000	BMAT	1	0.568004	0.373147	0.263861	0.13962	0.120709	1.5222	14.5229	0.351853	0.0274833	2.32108	0.119758	0.0889337	0.208692	0.208692	0.568004	0.373147	51.63	2507436	1492600	0.431996	0.425108
2013	66	SC Firm 66	1	US	1	MAN	1000	BMAT	1	0.522564	0.387775	0.305059	0.202569	0.114468	1.3476	14.636	0.405286	0.00572913	2.21931	0.00482153	0.0463075	0.0511291	0.0511291	0.522564	0.387775	62.2	2378482	1506500	0.477436	0.338409
2014	66	SC Firm 66	1	US	1	MAN	1000	BMAT	1	0.471791	0.300307	0.272293	0.1524	0.103843	1.57103	14.5916	0.46018	0.00804662	2.3882	-0.0209321	0.0471954	0.0262633	0.0262633	0.471791	0.300307	49.25	3360924	1442500	0.528209	0.310352
2006	67	SC Firm 67	1	US	1	MAN	3000	CGOODS	1	0.446866	0.250387	0.357063	0.186738	0.162154	1.7847	14.1036	0.0782948	0.0181785	2.66663	-0.0923512	0.0204524	-0.0718987	-0.0718987	0.446866	0.250387	25.5	1502646	501916	0.553134	0.251665
2007	67	SC Firm 67	1	US	1	MAN	3000	CGOODS	1	0.499421	0.294425	0.415752	0.229364	0.183476	1.69626	14.1549	0.0782799	0.00963565	1.77857	-0.0240755	-0.0598784	-0.0839538	-0.0839538	0.499421	0.294425	19.35	1147500	478833	0.500579	0.261802
2008	67	SC Firm 67	1	US	1	MAN	3000	CGOODS	1	0.496595	0.252667	0.392795	0.181474	0.171564	1.96541	14.2173	0.0830713	0.00686042	-0.291621	0.0352973	-0.034015	0.00128226	0.00128226	0.496595	0.252667	26.25	1524648	515472	0.503405	0.275946
2009	67	SC Firm 67	1	US	1	MAN	3000	CGOODS	1	0.44837	0.242078	0.334114	0.164696	0.197453	1.85217	14.279	0.0712205	0.0199745	-2.77553	0.0218658	0.0235976	0.0454634	0.0454634	0.44837	0.242078	29.51	1696635	541899	0.55163	0.263158
2007	68	SC Firm 68	1	US	1	MAN	9000	TECH	1	0.131937	0.0244462	0.0680332	0.00910931	0.0473145	7.025	11.3336	0.0862343	0.129833	1.77857	0.0226952	0.410394	0.43309	0.43309	0.131937	0.0244462	23.02	927875	17760	0.868063	0.0775952
2008	68	SC Firm 68	1	US	1	MAN	9000	TECH	1	0.149526	0.0496294	0.0355224	0.0108212	0.0903456	3.01286	11.3692	0.0735294	0.00749148	-0.291621	0.0320381	0.0675028	0.0995409	0.0995409	0.149526	0.0496294	10.51	432833	22603	0.850474	0.118203
2009	68	SC Firm 68	1	US	1	MAN	9000	TECH	1	0.217333	0.0401982	0.054491	0.00861743	-0.032178	5.40653	11.525	0.0749368	0.0829939	-2.77553	0.104202	0.246282	0.350484	0.350484	0.217333	0.0401982	23.83	1036776	43422	0.782667	0.172227
2010	68	SC Firm 68	1	US	1	MAN	9000	TECH	1	0.175204	0.0284305	0.0439001	0.00628545	0.397801	6.16255	12.2381	0.0485632	0.129833	2.53192	0.0263048	0.161272	0.187576	0.187576	0.175204	0.0284305	37.68	1746029	51093	0.824796	0.157623
2011	68	SC Firm 68	1	US	1	MAN	9000	TECH	1	0.121075	0.0302981	0.0219433	0.00506303	0.0600377	3.99611	12.4654	0.0472635	0.129833	1.60145	-0.0207491	0.21118	0.190431	0.190431	0.121075	0.0302981	28.43	1396008	43618	0.878925	0.11786
2012	68	SC Firm 68	1	US	1	MAN	9000	TECH	1	0.25638	0.05104	0.158248	0.0284924	-0.0340192	5.02312	12.3694	0.0925841	0.09628	2.32108	0.124804	0.128222	0.253026	0.253026	0.25638	0.05104	31.21	1580193	84991	0.74362	0.123884
2013	68	SC Firm 68	1	US	1	MAN	9000	TECH	1	0.21596	0.0422348	0.139845	0.025368	0.0859546	5.11332	12.6248	0.0774325	0.0862125	2.21931	-0.0150033	0.122198	0.107195	0.107195	0.21596	0.0422348	34.51	1802155	79470	0.78404	0.0937375
2014	68	SC Firm 68	1	US	1	MAN	9000	TECH	1	0.218512	0.0258513	0.1256	0.0134493	0.0651201	7.29543	12.8293	0.139322	0.00507735	2.3882	0.0241427	0.113239	0.137382	0.137382	0.218512	0.0258513	61.82	3366611	89341	0.781488	0.113195
2004	69	SC Firm 69	1	US	1	MAN	2000	IND	1	0.4339	0.0952486	0	0	0.14252	4.55545	12.5451	0.0300751	0.00173036	3.78574	0.12015	0.0749951	0.195145	0.195145	0.4339	0.0952486	66.94	2384113	250990	0.5661	0.4339
2005	69	SC Firm 69	1	US	1	MAN	2000	IND	1	0.469853	0.0879642	0	0	0.147624	5.34142	12.8	0.025311	0.00479908	3.34522	0.12461	-0.00181569	0.122795	0.122795	0.469853	0.0879642	89.7	3541601	341581	0.530147	0.469853
2006	69	SC Firm 69	1	US	1	MAN	2000	IND	1	0.56815	0.109076	0	0	0.155986	5.20874	13.0403	0.0366657	0.00302179	2.66663	0.104081	-0.134942	-0.0308618	-0.0308618	0.56815	0.109076	87.7	3415732	418190	0.43185	0.56815
2007	69	SC Firm 69	1	US	1	MAN	2000	IND	1	0.876009	0.184947	0	0	0.234298	4.73655	13.1857	0.168702	0.0451176	1.77857	0.108366	-0.208	-0.0996338	-0.0996338	0.876009	0.184947	60.1	2103114	477225	0.123991	0.686634
2008	69	SC Firm 69	1	US	1	MAN	2000	IND	1	0.923092	0.360623	0	0	0.315068	2.63247	13.2327	0.244588	0.0431311	-0.291621	-0.120222	-0.0667739	-0.186996	-0.186996	0.923092	0.360623	22.06	751005	423583	0.0769082	0.686634
2009	69	SC Firm 69	1	US	1	MAN	2000	IND	1	0.879148	0.323161	0	0	0.268129	2.72046	12.9867	0.211397	0.0317093	-2.77553	-0.121769	0.0191448	-0.102624	-0.102624	0.879148	0.323161	22.82	779235	372051	0.120852	0.686634
2010	69	SC Firm 69	1	US	1	MAN	2000	IND	1	0.836332	0.248713	0	0	0.19793	3.36264	12.9772	0.162972	0.0418384	2.53192	0.107033	0.0137979	0.120831	0.120831	0.836332	0.248713	37.55	1288793	426654	0.163668	0.686634
2011	69	SC Firm 69	1	US	1	MAN	2000	IND	1	0.848227	0.262961	0	0	0.213972	3.22568	13.0912	0.151737	0.0128278	1.60145	0.0487884	-0.0650637	-0.0162753	-0.0162753	0.848227	0.262961	38.1	1268825	452692	0.151773	0.686634
2004	70	SC Firm 70	1	US	0	SERV	4000	HCARE	1	0.568819	0.125782	0.45587	0.0837237	0.0477001	4.52226	12.8413	0.048531	0.0295896	3.78574	0.134171	0.083938	0.218109	0.218109	0.568819	0.125782	6.63	4377620	629849	0.431181	0.207577
2005	70	SC Firm 70	1	US	0	SERV	4000	HCARE	1	0.49474	0.0531679	0.386175	0.0348225	0.0777787	7.29543	13.1936	0.0615721	0.0196842	3.34522	-0.00581016	0.0752396	0.0694295	0.0694295	0.49474	0.0531679	16.2	11086369	622538	0.50526	0.176867
2006	70	SC Firm 70	1	US	0	SERV	4000	HCARE	1	0.273202	0.0333959	0.175242	0.0191552	0.0731372	7.29543	13.7089	0.0536024	0.00181834	2.66663	0.0456486	0.410394	0.456043	0.456043	0.273202	0.0333959	28.765	21633280	747423	0.726798	0.12323
2007	70	SC Firm 70	1	US	0	SERV	4000	HCARE	1	0.209548	0.0390369	0.0713109	0.0116297	0.126453	5.36793	14.1561	0.0546698	0.0380892	1.77857	0.00257886	0.177152	0.179731	0.179731	0.209548	0.0390369	23.105	18628387	756736	0.790452	0.151788
2008	70	SC Firm 70	1	US	0	SERV	4000	HCARE	1	0.214597	0.0362239	0.00631928	0.000874034	0.0959321	5.92419	14.6286	0.0560081	0.0373839	-0.291621	0.0443631	0.410394	0.454757	0.454757	0.214597	0.0362239	27.64	25380686	953942	0.785403	0.209602
2009	70	SC Firm 70	1	US	0	SERV	4000	HCARE	1	0.18457	0.0374399	0	0	0.179539	4.92977	14.805	0.055256	0.0645559	-2.77553	0.00756368	0.0234781	0.0310418	0.0310418	0.18457	0.0374399	27.84	25573349	994705	0.81543	0.18457
2010	70	SC Firm 70	1	US	0	SERV	4000	HCARE	1	0.325269	0.106342	0.153749	0.0429219	0.127304	3.05872	15.1036	0.0501042	0.0383717	2.53192	0.22753	0.156402	0.383932	0.383932	0.325269	0.106342	29.57	27818765	3310319	0.674731	0.289433
2011	70	SC Firm 70	1	US	0	SERV	4000	HCARE	1	0.371596	0.111681	0.222777	0.0574397	0.166227	3.3273	15.3929	0.0505743	0.0198568	1.60145	0.0407601	-0.189612	-0.148852	-0.148852	0.371596	0.111681	33.8	29574471	3718161	0.628404	0.268932
2012	70	SC Firm 70	1	US	0	SERV	4000	HCARE	1	0.427931	0.132285	0.314501	0.0855077	0.187386	3.23491	15.5215	0.0492881	0.0235233	2.32108	0.111069	-0.0878702	0.0231983	0.0231983	0.427931	0.132285	39.235	32937928	5021473	0.572069	0.252256
2013	70	SC Firm 70	1	US	0	SERV	4000	HCARE	1	0.521998	0.0916341	0.425759	0.0640998	0.175965	5.69655	15.6864	0.0443557	0.010768	2.21931	0.146651	-0.132151	0.0145005	0.0145005	0.521998	0.0916341	84.484	69226190	6983400	0.478002	0.227759
2014	70	SC Firm 70	1	US	0	SERV	4000	HCARE	1	0.591675	0.102833	0.492517	0.0712955	0.169624	5.75372	15.8529	0.0370586	0.000179613	2.3882	0.188944	-0.0757954	0.113148	0.113148	0.591675	0.102833	111.86	89510372	10259700	0.408325	0.227432
2004	71	SC Firm 71	1	US	0	SERV	4000	HCARE	1	0.45469	0.11574	0.102501	0.017612	-0.0317999	3.92853	11.3336	0.0810871	0.129833	3.78574	0.276133	0.410394	0.686528	0.686528	0.45469	0.11574	9.94	417955	54706	0.54531	0.392412
2005	71	SC Firm 71	1	US	0	SERV	4000	HCARE	1	0.463087	0.11292	0.130961	0.0217569	0.0673043	4.10103	11.3505	0.125984	0.0525535	3.34522	-0.0670718	0.0328333	-0.0342385	-0.0342385	0.463087	0.11292	8.78	375392	47785	0.536913	0.382176
2006	71	SC Firm 71	1	US	0	SERV	4000	HCARE	1	0.208486	0.069627	0.00276538	0.000787258	-0.0340192	2.99433	11.3777	0.0840804	0.073221	2.66663	-0.0765235	0.410394	0.333871	0.333871	0.208486	0.069627	8.5	467077	34955	0.791514	0.206291
2007	71	SC Firm 71	1	US	0	SERV	4000	HCARE	1	0.235351	0.0254777	3.21357e-05	2.7297e-06	-0.0151249	7.29543	11.7712	0.105506	0.0108718	1.77857	0.0206109	0.0961555	0.116766	0.116766	0.235351	0.0254777	26.35	1465360	38310	0.764649	0.235327
2008	71	SC Firm 71	1	US	0	SERV	4000	HCARE	1	0.29979	0.0843728	0.10204	0.0238735	0.00576153	3.55316	12.0414	0.131042	0.0102781	-0.291621	0.0915594	0.145359	0.236918	0.236918	0.29979	0.0843728	10.38	598551	55155	0.70021	0.220221
2009	71	SC Firm 71	1	US	0	SERV	4000	HCARE	1	0.356137	0.0879308	0.10808	0.0206838	0.00489083	4.0502	12.0472	0.121241	0.00653408	-2.77553	0.0777536	0.107225	0.184978	0.184978	0.356137	0.0879308	12.48	731889	70560	0.643863	0.278116
2010	71	SC Firm 71	1	US	0	SERV	4000	HCARE	1	0.303471	0.0463352	0.0416012	0.00481725	0.0804765	6.54947	12.2665	0.124373	0.0570143	2.53192	-0.0163682	0.145111	0.128742	0.128742	0.303471	0.0463352	22.75	1377936	66949	0.696529	0.273237
2011	71	SC Firm 71	1	US	0	SERV	4000	HCARE	1	0.261056	0.0327874	0	0	0.107688	7.29543	12.5338	0.124997	0.02997	1.60145	0.027516	0.193756	0.221272	0.221272	0.261056	0.0327874	34.41	2207654	74837	0.738944	0.261056
2012	71	SC Firm 71	1	US	0	SERV	4000	HCARE	1	0.253366	0.0359104	0.00748968	0.000827619	0.0584538	7.0555	12.7105	0.165378	0.0325894	2.32108	0.0276434	0.168159	0.195802	0.195802	0.253366	0.0359104	33.86	2255208	84002	0.746634	0.247732
2013	71	SC Firm 71	1	US	0	SERV	4000	HCARE	1	0.277149	0.0330502	0	0	0.0373032	7.29543	12.9024	0.215117	0.0172946	2.21931	0.064272	0.14106	0.205332	0.205332	0.277149	0.0330502	46.672	3199664	109364	0.722851	0.277149
2014	71	SC Firm 71	1	US	0	SERV	4000	HCARE	1	0.553646	0.102699	0.439913	0.067577	0.0219349	5.39096	13.0608	0.145878	0.00726913	2.3882	0.364544	0.150111	0.514655	0.514655	0.553646	0.102699	54.14	3838764	439359	0.446354	0.203064
2006	72	SC Firm 72	1	US	1	MAN	9000	TECH	1	0.344424	0.126256	0.174679	0.0550098	0.193887	2.72799	14.1362	0.239197	0.00111756	2.66663	0.0302279	0.0223979	0.0526258	0.0526258	0.344424	0.126256	11.375	3566839	515408	0.655576	0.24492
2007	72	SC Firm 72	1	US	1	MAN	9000	TECH	1	0.289232	0.0957715	0.137733	0.0399157	0.211397	3.02002	14.2341	0.273876	0.00687326	1.77857	-0.0157507	0.0550405	0.0392898	0.0392898	0.289232	0.0957715	14.1	4614919	488790	0.710768	0.216374
2008	72	SC Firm 72	1	US	1	MAN	9000	TECH	1	0.249567	0.0645174	0.0911026	0.0203632	0.237493	3.86822	14.3319	0.256992	0.0194475	-0.291621	-0.0102909	0.011553	0.0012621	0.0012621	0.249567	0.0645174	20.61	6806635	469433	0.750433	0.227802
2009	72	SC Firm 72	1	US	1	MAN	9000	TECH	1	0.218526	0.0561918	0.0669716	0.0150526	0.223692	3.88892	14.3294	0.236985	0.00873831	-2.77553	3.90958e-05	0.0344555	0.0344946	0.0344946	0.218526	0.0561918	23.685	7886090	469517	0.781474	0.208217
2004	73	SC Firm 73	1	US	0	SERV	4000	HCARE	1	0.403979	0.257351	0.304927	0.1832	0.0761559	1.56976	13.4929	0.135962	0.0800054	3.78574	0.277975	0.383463	0.661438	0.661438	0.403979	0.257351	46.01	3062307	1061187	0.596021	0.177965
2005	73	SC Firm 73	1	US	0	SERV	4000	HCARE	1	0.264577	0.18051	0.136934	0.0885418	0.10741	1.46572	13.8088	0.152667	0.00892537	3.34522	-0.153508	0.0626469	-0.0908613	-0.0908613	0.264577	0.18051	42.37	3048754	671551	0.735423	0.163513
2006	73	SC Firm 73	1	US	0	SERV	4000	HCARE	1	0.354231	0.238396	0.257263	0.165033	0.105867	1.48589	13.8723	0.209085	0.000572886	2.66663	0.0916543	-0.0622832	0.0293711	0.0293711	0.354231	0.238396	43.25	2894274	905961	0.645769	0.152596
2007	73	SC Firm 73	1	US	0	SERV	4000	HCARE	1	0.311582	0.162505	0.208914	0.101702	0.111768	1.91737	14.023	0.266898	0.00522724	1.77857	-0.0113365	0.0446945	0.033358	0.033358	0.311582	0.162505	65.8	4505108	874156	0.688418	0.155058
2008	73	SC Firm 73	1	US	0	SERV	4000	HCARE	1	0.398143	0.336958	0.285636	0.23499	0.159573	1.18158	14.0743	0.390978	0.0269035	-0.291621	-0.0100714	-0.0523458	-0.0624172	-0.0624172	0.398143	0.336958	26.2	1677663	852589	0.601857	0.179692
2009	73	SC Firm 73	1	US	0	SERV	4000	HCARE	1	0.356602	0.265778	0.2579	0.184987	0.128043	1.34173	13.9739	0.391882	0.0224776	-2.77553	-0.0302192	0.0067352	-0.023484	-0.023484	0.356602	0.265778	33.69	2171313	785983	0.643398	0.152452
2010	74	SC Firm 74	1	US	1	MAN	1	OILGAS	1	0.436236	0.299564	0.294702	0.187616	0.0762998	1.45624	13.2275	0.121652	0.0425632	2.53192	0.00874493	-0.00018223	0.0085627	0.0085627	0.436236	0.299564	33.78	973936	416535	0.563764	0.241664
2011	74	SC Firm 74	1	US	1	MAN	1	OILGAS	1	0.442318	0.244968	0.263621	0.127739	0.101705	1.80561	13.5856	0.116904	0.0186176	1.60145	0.0876613	0.0618183	0.14948	0.14948	0.442318	0.244968	54.07	1601158	519491	0.557682	0.280086
2012	74	SC Firm 74	1	US	1	MAN	1	OILGAS	1	0.440624	0.226028	0.256147	0.113212	0.118297	1.94942	13.8296	0.127859	0.0113934	2.32108	0.0493937	0.0124141	0.0618079	0.0618079	0.440624	0.226028	66.6891	2003446	585078	0.559376	0.282859
2013	74	SC Firm 74	1	US	1	MAN	1	OILGAS	1	0.450955	0.184913	0.28617	0.099692	0.120678	2.43874	13.9789	0.153394	0.000710581	2.21931	0.0506633	-0.0160355	0.0346278	0.0346278	0.450955	0.184913	95.64	2905400	659129	0.549045	0.263491
2014	74	SC Firm 74	1	US	1	MAN	1	OILGAS	1	0.366124	0.33927	0.184018	0.167002	0.124025	1.07915	13.9919	0.17622	0.00102517	2.3882	-0.0846974	0.0290015	-0.055696	-0.055696	0.366124	0.33927	34.2	1042493	535296	0.633876	0.255243
2005	75	SC Firm 75	1	US	0	SERV	5000	CSERV	1	0.51116	0.24943	0.364337	0.154088	0.115503	2.04931	13.7277	0.0776484	0.0150545	3.34522	-0.0568989	0.037701	-0.0191979	-0.0191979	0.51116	0.24943	49.68	1290667	428916	0.48884	0.261976
2006	75	SC Firm 75	1	US	0	SERV	5000	CSERV	1	0.435687	0.265726	0.251654	0.136162	0.158523	1.63961	13.8339	0.0884169	0.0288817	2.66663	-0.104995	-0.00864	-0.113635	-0.113635	0.435687	0.265726	36.98	955056	345625	0.564313	0.279074
2007	75	SC Firm 75	1	US	0	SERV	5000	CSERV	1	0.519515	0.230117	0.377879	0.143771	0.190824	2.25762	13.9109	0.0967237	0.0180553	1.77857	0.0708672	-0.182159	-0.111292	-0.111292	0.519515	0.230117	55.88	1338982	400219	0.480485	0.235199
2008	75	SC Firm 75	1	US	0	SERV	5000	CSERV	1	0.448004	0.276288	0.286511	0.158878	0.214661	1.62151	13.9544	0.101316	0.0145548	-0.291621	-0.0788616	-0.0134883	-0.0923499	-0.0923499	0.448004	0.276288	39.77	891421	340314	0.551996	0.255933
2009	75	SC Firm 75	1	US	0	SERV	5000	CSERV	1	0.386084	0.225787	0.232179	0.122981	0.195622	1.70995	13.9897	0.0919594	0.0119354	-2.77553	-0.0292018	0.0221497	-0.00705212	-0.00705212	0.386084	0.225787	47.97	1084868	316384	0.613916	0.232078
2010	75	SC Firm 75	1	US	0	SERV	5000	CSERV	1	0.413205	0.202443	0.246322	0.105393	0.214373	2.04109	14.0628	0.095514	0.0125974	2.53192	0.0320938	-0.103476	-0.0713825	-0.0713825	0.413205	0.202443	63.51	1351409	343027	0.586795	0.251643
2011	75	SC Firm 75	1	US	0	SERV	5000	CSERV	1	0.443216	0.265499	0.273447	0.145958	0.234744	1.66937	14.12	0.104222	0.0129348	1.60145	0.0122263	-0.14754	-0.135314	-0.135314	0.443216	0.265499	51.21	975903	352758	0.556784	0.270682
2012	75	SC Firm 75	1	US	0	SERV	5000	CSERV	1	0.440509	0.229528	0.266664	0.120947	0.227931	1.91919	14.1732	0.106947	0.00371591	2.32108	0.0301468	-0.0447543	-0.0146075	-0.0146075	0.440509	0.229528	68.59	1271116	378673	0.559491	0.269239
2013	75	SC Firm 75	1	US	0	SERV	5000	CSERV	1	0.46717	0.236569	0.278231	0.119905	0.223349	1.97477	14.1615	0.104011	0.00375976	2.21931	0.0434564	-0.0759102	-0.0324538	-0.0324538	0.46717	0.236569	76.62	1347347	417510	0.53283	0.29232
2014	75	SC Firm 75	1	US	0	SERV	5000	CSERV	1	0.440303	0.175011	0.234573	0.0763322	0.240974	2.51587	14.1914	0.122493	0.010894	2.3882	-0.0452117	-0.0929748	-0.138187	-0.138187	0.440303	0.175011	105.67	1784843	378631	0.559697	0.303601
2004	76	SC Firm 76	1	US	1	MAN	1	OILGAS	1	0.436765	0.268971	0.17676	0.0924564	0.250998	1.62384	18.3899	0.476976	0.0341469	3.78574	0.0209424	-0.00335808	0.0175843	0.0175843	0.436765	0.268971	52.51	110644878	40710000	0.563235	0.393807
2005	76	SC Firm 76	1	US	1	MAN	1	OILGAS	1	0.412412	0.290493	0.148258	0.092179	0.222175	1.4197	18.3899	0.506147	0.0161695	3.34522	0.0888877	0.0883393	0.177227	0.177227	0.412412	0.290493	56.77	126749622	51895000	0.587588	0.399633
2006	76	SC Firm 76	1	US	1	MAN	1	OILGAS	1	0.392421	0.246423	0.108803	0.0582137	0.269536	1.59247	18.3899	0.519181	0.0266982	2.66663	0.00113852	-0.0458576	-0.0447191	-0.0447191	0.392421	0.246423	73.53	159159967	52046000	0.607579	0.406061
2007	76	SC Firm 76	1	US	1	MAN	1	OILGAS	1	0.400091	0.233784	0.0749508	0.0357432	0.248706	1.71137	18.3899	0.528343	0.0160954	1.77857	0.050287	-0.0348756	0.0154114	0.0154114	0.400091	0.233784	93.33	195100202	59528000	0.599909	0.43328
2008	76	SC Firm 76	1	US	1	MAN	1	OILGAS	1	0.390767	0.298147	0.0831186	0.0566387	0.292985	1.31065	18.3899	0.569478	0.0308912	-0.291621	0.0214066	-0.0610803	-0.0396736	-0.0396736	0.390767	0.298147	73.97	148253025	62978000	0.609233	0.407136
2009	76	SC Firm 76	1	US	1	MAN	1	OILGAS	1	0.371678	0.283583	0.0922693	0.0636871	0.169486	1.31065	18.3899	0.586001	0.0975401	-2.77553	-0.0108856	0.000370548	-0.0105151	-0.0105151	0.371678	0.283583	76.99	154574502	61186000	0.628322	0.377795
2010	76	SC Firm 76	1	US	1	MAN	1	OILGAS	1	0.362566	0.267778	0.0887864	0.0589545	0.214603	1.35398	18.3899	0.565593	0.0339274	2.53192	0.0314176	0.00536345	0.0367811	0.0367811	0.362566	0.267778	91.25	183182621	66991000	0.637434	0.369174
2011	76	SC Firm 76	1	US	1	MAN	1	OILGAS	1	0.346334	0.256042	0.0690246	0.0459474	0.254528	1.35265	18.3899	0.585314	0.0346402	1.60145	0.0265284	-0.00768592	0.0188424	0.0188424	0.346334	0.256042	106.4	210796161	72548000	0.653666	0.372075
2012	76	SC Firm 76	1	US	1	MAN	1	OILGAS	1	0.338163	0.272331	0.0732745	0.0547444	0.228065	1.24174	18.3899	0.606691	0.0158384	2.32108	0.0267746	-0.00884618	0.0179284	0.0179284	0.338163	0.272331	108.14	210515910	78786000	0.661837	0.361685
2013	76	SC Firm 76	1	US	1	MAN	1	OILGAS	1	0.328426	0.258522	0.107055	0.0787446	0.165168	1.2704	18.3899	0.649565	0.0432962	2.21931	0.0179426	0.00894965	0.0268923	0.0268923	0.328426	0.258522	124.91	239028159	83339000	0.671574	0.331854
2014	76	SC Firm 76	1	US	1	MAN	1	OILGAS	1	0.334847	0.296989	0.135853	0.116551	0.151711	1.12747	18.3899	0.688553	0.0146218	2.3882	0.0215731	-0.0179531	0.00361995	0.00361995	0.334847	0.296989	112.18	210859003	89078000	0.665153	0.312676
2004	77	SC Firm 77	1	US	1	MAN	2000	IND	1	0.574471	0.264048	0.152911	0.0457778	0.112973	2.17563	14.4559	0.108345	0.0129171	3.78574	0.0818722	0.0197711	0.101643	0.101643	0.574471	0.264048	20	1765625	633480	0.425529	0.497658
2005	77	SC Firm 77	1	US	1	MAN	2000	IND	1	0.646792	0.246731	0.0972319	0.0189011	0.0496807	2.62144	14.6298	0.0999536	0.0396762	3.34522	0.187022	0.0100245	0.197046	0.197046	0.646792	0.246731	25.21	2720710	891162	0.353208	0.610919
2006	77	SC Firm 77	1	US	1	MAN	2000	IND	1	0.692825	0.338636	0.0449219	0.0105648	0.0973234	2.04593	14.955	0.10908	0.0319312	2.66663	0.19341	-0.0238521	0.169558	0.169558	0.692825	0.338636	27.34	2414498	1236286	0.307175	0.681567
2007	77	SC Firm 77	1	US	1	MAN	2000	IND	1	0.75126	0.313832	0.203925	0.0373431	0.0761788	2.39383	15.2888	0.0806749	0.0127621	1.77857	0.359215	0.0278612	0.387076	0.387076	0.75126	0.313832	60.44	5179712	2369042	0.24874	0.686634
2008	77	SC Firm 77	1	US	1	MAN	2000	IND	1	0.792461	0.70069	0.204935	0.136464	0.0241149	1.13097	15.5981	0.112004	0.0463362	-0.291621	0.00296962	-0.0416937	-0.0387241	-0.0387241	0.792461	0.70069	10.05	1015779	2377953	0.207539	0.686634
2009	77	SC Firm 77	1	US	1	MAN	2000	IND	1	0.676838	0.524561	0.110175	0.0612311	0.118899	1.29029	15.3321	0.104785	0.0668188	-2.77553	-0.111408	0.0589542	-0.0524535	-0.0524535	0.676838	0.524561	20.22	1850657	2041862	0.323162	0.670333
2010	77	SC Firm 77	1	US	1	MAN	2000	IND	1	0.602535	0.340521	0.0649546	0.0231143	0.12259	1.76945	15.1081	0.0997431	0.0035385	2.53192	-0.0992482	-0.00791398	-0.107162	-0.107162	0.602535	0.340521	32.9	3395178	1753096	0.397465	0.60963
2011	77	SC Firm 77	1	US	1	MAN	2000	IND	1	0.615841	0.342203	0.0307742	0.0101986	0.124566	1.79964	15.3308	0.0798948	0.00397659	1.60145	0.0812548	-0.0402391	0.0410158	0.0410158	0.615841	0.342203	37.8	3882089	2019559	0.384159	0.628666
2012	77	SC Firm 77	1	US	1	MAN	2000	IND	1	0.663681	0.391475	0.354586	0.151897	0.118977	1.69534	15.5176	0.066026	0.000334213	2.32108	0.197235	-0.0198394	0.177396	0.177396	0.663681	0.391475	46.35	4466728	2873522	0.336319	0.499327
2013	77	SC Firm 77	1	US	1	MAN	2000	IND	1	0.742635	0.443193	0.432274	0.173575	0.0997697	1.67565	16.222	0.0840076	0.0162915	2.21931	0.364544	0.0562042	0.420749	0.420749	0.742635	0.443193	83.14	8760600	6973038	0.257365	0.554339
2014	77	SC Firm 77	1	US	1	MAN	2000	IND	1	0.690247	0.559279	0.387052	0.264491	0.125622	1.23417	16.3785	0.0822565	0.0181647	2.3882	-0.0530659	-0.00257008	-0.055636	-0.055636	0.690247	0.559279	41.98	5102578	6475225	0.309753	0.512528
2005	78	SC Firm 78	1	US	0	SERV	5000	CSERV	1	0.187967	0.0465366	0	0	0.347369	4.03913	14.1552	0.346135	0.01061	3.34522	0.0454197	0.044336	0.0897557	0.0897557	0.187967	0.0465366	20.69	3848903	187857	0.812033	0.193099
2006	78	SC Firm 78	1	US	0	SERV	5000	CSERV	1	0.242023	0.120206	0	0	0.314063	2.0134	14.3108	0.430632	0.0352575	2.66663	0.0649041	0.0242046	0.0891086	0.0891086	0.242023	0.120206	9.03	1878772	256696	0.757977	0.242023
2007	78	SC Firm 78	1	US	0	SERV	5000	CSERV	1	0.270061	0.324923	0	0	0.170732	0.831152	14.3545	0.454317	0.107105	1.77857	0.0647247	0.0157664	0.0804911	0.0804911	0.270061	0.324923	4.18	701435	337610	0.729939	0.270061
2008	78	SC Firm 78	1	US	0	SERV	5000	CSERV	1	0.264224	0.124675	0	0	0.0665822	2.11931	14.2745	0.457146	0.0778865	-0.291621	-0.0111101	0.00719061	-0.00391948	-0.00391948	0.264224	0.124675	14.05	2274669	323987	0.735776	0.264224
2009	78	SC Firm 78	1	US	0	SERV	5000	CSERV	1	0.255448	0.146415	0	0	0.162308	1.74468	14.3538	0.395456	0.0722833	-2.77553	0.00978008	0.00764026	0.0174203	0.0174203	0.255448	0.146415	12.03	1964005	336885	0.744552	0.255448
2010	78	SC Firm 78	1	US	0	SERV	5000	CSERV	1	0.247958	0.156481	0	0	0.192393	1.58459	14.46	0.365374	0.0259493	2.53192	0.0100486	0.01017	0.0202186	0.0202186	0.247958	0.156481	11.14	1892705	351114	0.752042	0.247958
2011	78	SC Firm 78	1	US	0	SERV	5000	CSERV	1	0.25527	0.110671	0	0	0.234491	2.30658	14.6023	0.386085	0.0266375	1.60145	0.0089008	0.0505399	0.0594407	0.0594407	0.25527	0.110671	18.46	2923421	363799	0.74473	0.291845
2012	78	SC Firm 78	1	US	0	SERV	5000	CSERV	1	0.275071	0.146826	0	0	0.252536	1.87345	14.7637	0.384733	0.014361	2.32108	0.04491	0.0294446	0.0743546	0.0743546	0.275071	0.146826	18.84	2526437	434785	0.724929	0.308377
2013	78	SC Firm 78	1	US	0	SERV	5000	CSERV	1	0.300615	0.139124	0	0	0.242757	2.16078	14.7656	0.46022	0.0193972	2.21931	-0.0164704	0.0221311	0.00566077	0.00566077	0.300615	0.139124	16.21	2550639	412201	0.699385	0.336998
2007	79	SC Firm 79	1	US	1	MAN	3000	CGOODS	1	0.509174	0.264711	0.407816	0.192891	0.143351	1.92351	14.6134	0.138541	0.00563886	1.77857	-0.0183886	0.0367887	0.0184001	0.0184001	0.509174	0.264711	13.5175	3581800	1289479	0.490826	0.235424
2008	79	SC Firm 79	1	US	1	MAN	3000	CGOODS	1	0.463313	0.248152	0.362828	0.178786	0.151219	1.86705	14.7003	0.137258	0.00357351	-0.291621	0.00302166	0.0315634	0.0345851	0.0345851	0.463313	0.248152	14.03	3932488	1297944	0.536687	0.219096
2009	79	SC Firm 79	1	US	1	MAN	3000	CGOODS	1	0.421879	0.235758	0.311666	0.160656	0.152003	1.78946	14.7401	0.14611	0.000827833	-2.77553	0.00566404	0.0282692	0.0339332	0.0339332	0.421879	0.235758	15.1125	4264715	1315607	0.578121	0.224653
2010	79	SC Firm 79	1	US	1	MAN	3000	CGOODS	1	0.278487	0.143023	0.137826	0.0646524	0.176683	1.94715	14.7669	0.159004	0.0195643	2.53192	-0.168208	0.0324182	-0.13579	-0.13579	0.278487	0.143023	17.255	4914554	820200	0.721513	0.249491
2011	79	SC Firm 79	1	US	1	MAN	3000	CGOODS	1	0.2517	0.107556	0.097594	0.0373039	0.182063	2.34018	14.8269	0.162304	0.00307474	1.60145	-0.011387	-0.00137927	-0.0127662	-0.0127662	0.2517	0.107556	22.88	6511059	784700	0.7483	0.26453
2012	79	SC Firm 79	1	US	1	MAN	3000	CGOODS	1	0.382421	0.1741	0.263009	0.108327	0.153754	2.19656	14.8877	0.142993	0.0176729	2.32108	0.190942	-0.00422147	0.186721	0.186721	0.382421	0.1741	26.785	7434505	1567200	0.617579	0.276714
2013	79	SC Firm 79	1	US	1	MAN	3000	CGOODS	1	0.348334	0.138746	0.224436	0.0802187	0.160082	2.51059	14.9769	0.13947	0.00923041	2.21931	-0.0195788	0.0013616	-0.0182172	-0.0182172	0.348334	0.138746	33.14	9210576	1483800	0.651666	0.271498
2014	79	SC Firm 79	1	US	1	MAN	3000	CGOODS	1	0.409764	0.145903	0.297512	0.094376	0.168238	2.80847	15.0087	0.140643	0.000958394	2.3882	0.0710976	-0.0995823	-0.0284847	-0.0284847	0.409764	0.145903	39.405	10509440	1795300	0.590236	0.270285
2004	80	SC Firm 80	1	US	1	MAN	1	OILGAS	1	0.162332	0.101902	0	0	0.329242	1.59301	13.0714	0.740336	0.0226374	3.78574	0.0578717	0.0745147	0.132386	0.132386	0.162332	0.101902	37.9	1581540	179449	0.837668	0.366127
2005	80	SC Firm 80	1	US	1	MAN	1	OILGAS	1	0.207422	0.196613	0.0961485	0.0904763	0.203738	1.05497	13.9276	0.709004	0.0529561	3.34522	0.164495	0.410394	0.574889	0.574889	0.207422	0.196613	43.01	3543055	867092	0.792578	0.294816
2006	80	SC Firm 80	1	US	1	MAN	1	OILGAS	1	0.192959	0.235506	0.102193	0.127898	0.190415	0.819335	14.0509	0.761247	0.0237659	2.66663	0.0134272	0.0529052	0.0663324	0.0663324	0.192959	0.235506	36.5	3025241	931942	0.807041	0.291928
2007	80	SC Firm 80	1	US	1	MAN	1	OILGAS	1	0.191558	0.226385	0.101014	0.121861	0.18977	0.84616	14.1735	0.7575	0.00331069	1.77857	0.0177784	0.0198294	0.0376078	0.0376078	0.191558	0.226385	42.53	3510497	1027284	0.808442	0.3014
2008	80	SC Firm 80	1	US	1	MAN	1	OILGAS	1	0.315093	0.370508	0.170812	0.208579	0.32398	0.850436	14.4937	0.703042	0.0628543	-0.291621	0.0684422	-0.130717	-0.0622745	-0.0622745	0.315093	0.370508	26.78	2229666	1312341	0.684907	0.29428
2009	80	SC Firm 80	1	US	1	MAN	1	OILGAS	1	0.307018	0.194548	0.141303	0.0823273	0.178274	1.57811	13.8253	0.671252	0.0646371	-2.77553	-0.0739742	-0.0387143	-0.112689	-0.112689	0.307018	0.194548	52.97	4378320	1057534	0.692982	0.294274
2010	80	SC Firm 80	1	US	1	MAN	1	OILGAS	1	0.259135	0.130184	0.0977962	0.0443272	0.26453	1.99053	14.294	0.706462	0.0661768	2.53192	0.0164839	0.0675164	0.0840003	0.0840003	0.259135	0.130184	88.53	7545830	1129375	0.740865	0.320866
2011	80	SC Firm 80	1	US	1	MAN	1	OILGAS	1	0.246955	0.199479	0.0912297	0.0708734	0.227428	1.238	14.3796	0.792258	0.0284125	1.60145	0.0361477	0.0578382	0.0939859	0.0939859	0.246955	0.199479	61.9	5309416	1323032	0.753045	0.340048
2012	80	SC Firm 80	1	US	1	MAN	1	OILGAS	1	0.271058	0.25477	0.140289	0.130453	0.172036	1.06393	14.3004	0.817962	0.0452662	2.32108	0.0612247	0.0395294	0.100754	0.100754	0.271058	0.25477	57.73	4999186	1709063	0.728942	0.329955
2013	80	SC Firm 80	1	US	1	MAN	1	OILGAS	1	0.244182	0.162273	0.144239	0.0917838	0.208423	1.50476	14.5077	0.842747	0.0233224	2.21931	0.0085512	0.0509702	0.0595214	0.0595214	0.244182	0.162273	104.91	9143137	1771086	0.755818	0.318059
2014	80	SC Firm 80	1	US	1	MAN	1	OILGAS	1	0.28308	0.210124	0.193415	0.139085	0.185231	1.34721	14.701	0.815416	0.0216788	2.3882	0.0800969	0.0368754	0.116972	0.116972	0.28308	0.210124	106	9284809	2469955	0.71692	0.312272
2010	81	SC Firm 81	1	US	1	MAN	2000	IND	1	0.206374	0.0400196	0.0135817	0.00220245	0.256336	5.15683	13.4151	0.523052	0.00597255	2.53192	0.0339953	0.0509595	0.0849549	0.0849549	0.206374	0.0400196	46	2365770	98624	0.793626	0.202041
2011	81	SC Firm 81	1	US	1	MAN	2000	IND	1	0.18351	0.0499845	0	0	0.258753	3.67133	13.6134	0.471495	0.00425022	1.60145	0.00609642	-0.0134682	-0.00737183	-0.00737183	0.18351	0.0499845	30.6	1938879	102013	0.81649	0.190335
2012	81	SC Firm 81	1	US	1	MAN	2000	IND	1	0.649501	0.251792	0.524452	0.166861	0.193443	2.57951	13.8356	0.440944	0.0528645	2.32108	0.364544	-0.208	0.156544	0.156544	0.649501	0.251792	32.86	1143396	384783	0.350499	0.293946
2013	81	SC Firm 81	1	US	1	MAN	2000	IND	1	0.664531	0.192466	0.541928	0.124606	0.183602	3.45272	13.9704	0.465488	0.0116381	2.21931	0.0248966	-0.020538	0.00435862	0.00435862	0.664531	0.192466	56.85	1677283	399760	0.335469	0.288008
2014	81	SC Firm 81	1	US	1	MAN	2000	IND	1	0.733764	0.357697	0.639053	0.263487	0.166005	2.05136	14.0547	0.356144	0.0114865	2.3882	0.329552	0.0179983	0.34755	0.34755	0.733764	0.357697	74.84	1303082	725682	0.266236	0.293586
2004	82	SC Firm 82	1	US	1	MAN	2000	IND	1	0.268575	0.106568	0.174352	0.0641926	0.207446	2.52023	14.9363	0.267081	0.0030155	3.78574	0.0073212	-0.00601325	0.00130795	0.00130795	0.268575	0.106568	40.6405	6889488	821772	0.731425	0.157862
2005	82	SC Firm 82	1	US	1	MAN	2000	IND	1	0.351742	0.148426	0.264556	0.103583	0.205444	2.36982	15.0403	0.252182	0.000337356	3.34522	0.111826	-0.0707866	0.0410389	0.0410389	0.351742	0.148426	39.2374	6912378	1204801	0.648258	0.156574
2006	82	SC Firm 82	1	US	1	MAN	2000	IND	1	0.358527	0.173764	0.277847	0.126465	0.210986	2.0633	15.1257	0.257736	0.00224342	2.66663	0.0210927	-0.0567459	-0.0356532	-0.0356532	0.358527	0.173764	33.2199	6086845	1280112	0.641473	0.146066
2007	82	SC Firm 82	1	US	1	MAN	2000	IND	1	0.375541	0.239689	0.284097	0.172203	0.202005	1.56678	15.1862	0.255888	0.00713856	1.77857	0.0394302	-0.0427706	-0.00334033	-0.00334033	0.375541	0.239689	22.9535	4536961	1430286	0.624459	0.160338
2008	82	SC Firm 82	1	US	1	MAN	2000	IND	1	0.32371	0.252889	0.238157	0.181043	0.186983	1.28005	15.1438	0.245805	0.0130207	-0.291621	-0.060677	-0.00429756	-0.0649745	-0.0649745	0.32371	0.252889	25.7597	3558483	1204510	0.67629	0.15235
2009	82	SC Firm 82	1	US	1	MAN	2000	IND	1	0.323736	0.244336	0.226486	0.165114	0.152302	1.32497	15.0817	0.225335	0.0208992	-2.77553	0.0203129	0.00667248	0.0269854	0.0269854	0.323736	0.244336	27.6272	3974616	1285147	0.676264	0.163652
2010	82	SC Firm 82	1	US	1	MAN	2000	IND	1	0.42578	0.290771	0.339787	0.221526	0.145638	1.46431	15.1532	0.217424	0.00174341	2.53192	0.130476	-0.0829046	0.0475712	0.0475712	0.42578	0.290771	34.3957	4519631	1852970	0.57422	0.175362
2011	82	SC Firm 82	1	US	1	MAN	2000	IND	1	0.437378	0.280713	0.354085	0.21581	0.176151	1.5581	15.227	0.228674	0.0200516	1.60145	-0.00743691	-0.0917182	-0.0991551	-0.0991551	0.437378	0.280713	40.4132	4668579	1821990	0.562622	0.178066
2012	82	SC Firm 82	1	US	1	MAN	2000	IND	1	0.444966	0.257258	0.351818	0.189956	0.173643	1.72965	15.2779	0.227056	0.000370396	2.32108	0.0256964	-0.0385304	-0.012834	-0.012834	0.444966	0.257258	58.8808	5582762	1933657	0.555034	0.192141
2013	82	SC Firm 82	1	US	1	MAN	2000	IND	1	0.453461	0.217728	0.347867	0.151782	0.179202	2.0827	15.3128	0.191756	0.00450222	2.21931	0.0201443	-0.0569631	-0.0368188	-0.0368188	0.453461	0.217728	78.44	7270387	2023550	0.546539	0.217059
2014	82	SC Firm 82	1	US	1	MAN	2000	IND	1	0.484934	0.174519	0.375788	0.119086	0.2031	2.7787	15.3144	0.207854	0.0209856	2.3882	0.00227003	-0.121226	-0.118956	-0.118956	0.484934	0.174519	91.05	9616507	2033067	0.515066	0.228984
2004	83	SC Firm 83	1	US	1	MAN	9000	TECH	1	0.280836	0.0797525	0	0	0.164565	3.52135	13.516	0.0538697	0.0167331	3.78574	-0.215353	0.0673059	-0.148047	-0.148047	0.280836	0.0797525	24.46	4167568	361179	0.719164	0.280836
2005	83	SC Firm 83	1	US	1	MAN	9000	TECH	1	0.285144	0.0871571	0.024889	0.00607254	0.153639	3.27161	13.7198	0.0433948	0.0102232	3.34522	0.0725582	0.143733	0.216291	0.216291	0.285144	0.0871571	28.73	5073948	484454	0.714856	0.266897
2006	83	SC Firm 83	1	US	1	MAN	9000	TECH	1	0.276706	0.103857	0	0	0.132344	2.66429	13.9415	0.0457304	0.0163073	2.66663	0.0374073	0.0329785	0.0703857	0.0703857	0.276706	0.103857	27.05	4833592	560184	0.723294	0.276706
2007	83	SC Firm 83	1	US	1	MAN	9000	TECH	1	0.274735	0.0890733	0	0	0.117333	3.08437	14.1462	0.0532242	0.0121735	1.77857	0.053728	0.067839	0.121567	0.121567	0.274735	0.0890733	38.01	7121554	696368	0.725265	0.274735
2008	83	SC Firm 83	1	US	1	MAN	9000	TECH	1	0.288179	0.154658	0	0	0.109433	1.86332	14.2751	0.0943969	0.0142846	-0.291621	0.0297194	-0.0366466	-0.0069272	-0.0069272	0.288179	0.154658	23.57	4243920	776441	0.711821	0.288179
2009	83	SC Firm 83	1	US	1	MAN	9000	TECH	1	0.292008	0.10618	0	0	0.111197	2.75011	14.2943	0.080133	0.00201343	-2.77553	0.0408259	0.0257594	0.0665853	0.0665853	0.292008	0.10618	41.61	7598360	902640	0.707992	0.292008
2010	83	SC Firm 83	1	US	1	MAN	9000	TECH	1	0.310673	0.0823228	0	0	0.124162	3.77384	14.4439	0.067632	0.0144893	2.53192	0.0669535	0.0236038	0.0905573	0.0905573	0.310673	0.0823228	68.41	12826191	1150609	0.689327	0.310673
2011	83	SC Firm 83	1	US	1	MAN	9000	TECH	1	0.333952	0.108211	0	0	0.125972	3.08612	14.6069	0.0676732	0.0105064	1.60145	0.0532845	-0.0436202	0.00966425	0.00966425	0.333952	0.108211	60.72	11282626	1369051	0.666048	0.333952
2012	83	SC Firm 83	1	US	1	MAN	9000	TECH	1	0.349142	0.120456	0	0	0.126272	2.8985	14.7657	0.0632336	0.014314	2.32108	0.063709	0.00807689	0.0717859	0.0717859	0.349142	0.120456	65.62	12227762	1674625	0.650858	0.349142
2013	83	SC Firm 83	1	US	1	MAN	9000	TECH	1	0.363076	0.140332	0	0	0.124364	2.58727	14.8866	0.0650383	0.0059612	2.21931	0.0417894	-0.0271462	0.0146432	0.0146432	0.363076	0.140332	63.25	11593029	1892442	0.636924	0.363076
2014	83	SC Firm 83	1	US	1	MAN	9000	TECH	1	0.605653	0.245542	0.372975	0.11194	0.11847	2.46659	14.9606	0.0667232	0.010247	2.3882	0.262322	-0.208	0.0543216	0.0543216	0.605653	0.245542	63.8	10257509	3338362	0.394347	0.371082
2004	84	SC Firm 84	1	US	1	MAN	2000	IND	1	0.274861	0.113698	0.0511682	0.0179241	0.186888	2.41746	13.5769	0.226573	0.00379764	3.78574	0.0421171	0.0190444	0.0611615	0.0611615	0.274861	0.113698	27.385	1345117	172557	0.725139	0.27841
2005	84	SC Firm 84	1	US	1	MAN	2000	IND	1	0.246204	0.0979658	0.0309219	0.0104986	0.2067	2.51317	13.6808	0.2214	0.0134984	3.34522	-0.00933254	0.0244998	0.0151672	0.0151672	0.246204	0.0979658	29.71	1530817	166255	0.753796	0.260927
2006	84	SC Firm 84	1	US	1	MAN	2000	IND	1	0.223841	0.0880703	0.0275612	0.00940182	0.205366	2.54162	13.715	0.20141	0.00129406	2.66663	-0.00468306	-0.0176711	-0.0223541	-0.0223541	0.223841	0.0880703	33.81	1686220	162848	0.776159	0.239174
2007	84	SC Firm 84	1	US	1	MAN	2000	IND	1	0.213655	0.0826546	0.0291044	0.00984292	0.207273	2.58492	13.7334	0.228932	0.00140481	1.77857	-0.00666725	-0.00152611	-0.00819336	-0.00819336	0.213655	0.0826546	37.97	1752682	157920	0.786345	0.224562
2008	84	SC Firm 84	1	US	1	MAN	2000	IND	1	0.278537	0.140586	0.108319	0.0489516	0.190327	1.98126	13.8734	0.201068	0.0120396	-0.291621	0.113674	0.0323192	0.145993	0.145993	0.278537	0.140586	33.18	1631009	266806	0.721463	0.231942
2009	84	SC Firm 84	1	US	1	MAN	2000	IND	1	0.261975	0.136604	0.0677022	0.0313529	0.142071	1.91777	13.7187	0.193134	0.03417	-2.77553	-0.0119839	-0.0257832	-0.0377671	-0.0377671	0.261975	0.136604	32.44	1612562	255135	0.738025	0.241378
2010	84	SC Firm 84	1	US	1	MAN	2000	IND	1	0.244313	0.110545	0.0217048	0.00845686	0.168692	2.21007	13.8269	0.173804	0.0203288	2.53192	-0.000441285	-0.00595351	-0.00639479	-0.00639479	0.244313	0.110545	42.89	2049129	254675	0.755687	0.257541
2011	84	SC Firm 84	1	US	1	MAN	2000	IND	1	0.232623	0.0980718	0.019444	0.00706257	0.194072	2.37197	13.9347	0.162998	0.0187134	1.60145	0.00822692	-0.0166151	-0.00838816	-0.00838816	0.232623	0.0980718	49.99	2428017	264012	0.767377	0.249298
2012	84	SC Firm 84	1	US	1	MAN	2000	IND	1	0.210098	0.0990831	0.017126	0.00715331	0.18637	2.12042	13.9304	0.161842	0.00389991	2.32108	-0.00890832	-0.0100133	-0.0189216	-0.0189216	0.210098	0.0990831	47.78	2302894	253273	0.789902	0.238959
2013	84	SC Firm 84	1	US	1	MAN	2000	IND	1	0.243353	0.103654	0.131947	0.0518217	0.144227	2.34774	13.9384	0.144221	0.0268692	2.21931	0.0685423	0.0399767	0.108519	0.108519	0.243353	0.103654	64.35	3048929	352580	0.756647	0.172799
2014	84	SC Firm 84	1	US	1	MAN	2000	IND	1	0.360266	0.170608	0.254071	0.110649	0.138108	2.11166	14.2295	0.152669	0.0074736	2.3882	0.173594	0.00199495	0.175589	0.175589	0.360266	0.170608	66.64	3307974	680459	0.639734	0.19756
2004	85	SC Firm 85	1	US	1	MAN	3000	CGOODS	1	0.235869	0.028377	0.00651553	0.000620133	0.397801	7.29543	14.094	0.157303	0.00466329	3.78574	0.053259	0.151575	0.204834	0.204834	0.235869	0.028377	28.2	8434897	246348	0.764131	0.245977
2005	85	SC Firm 85	1	US	1	MAN	3000	CGOODS	1	0.226051	0.0244462	0.0146003	0.00123599	0.397801	7.29543	14.3173	0.148787	0.00203905	3.34522	0.0462553	0.151694	0.19795	0.19795	0.226051	0.0244462	33.34	12696317	309725	0.773949	0.217876
2006	85	SC Firm 85	1	US	1	MAN	3000	CGOODS	1	0.249693	0.0354264	0.00267231	0.000295628	0.397801	7.04822	14.526	0.18354	0.0342669	2.66663	0.0592713	0.140079	0.19935	0.19935	0.249693	0.0354264	42.96	11057944	406131	0.750307	0.267145
2007	85	SC Firm 85	1	US	1	MAN	3000	CGOODS	1	0.205229	0.0276876	0.00158982	0.000175569	0.397801	7.29543	14.7758	0.150422	0.0239424	1.77857	0.0394279	0.0827687	0.122197	0.122197	0.205229	0.0276876	30.58	17653775	502710	0.794771	0.218843
2008	85	SC Firm 85	1	US	1	MAN	3000	CGOODS	1	0.325542	0.069056	0.00188659	0.000290401	0.397801	4.71417	14.9726	0.206566	0.0741661	-0.291621	0.101852	0.0696726	0.171524	0.171524	0.325542	0.069056	20.77	9862788	731607	0.674458	0.335556
2009	85	SC Firm 85	1	US	1	MAN	3000	CGOODS	1	0.338604	0.0920563	0.0191288	0.00384739	0.397801	3.67823	14.9881	0.231242	0.0929308	-2.77553	0.0533031	0.0130509	0.066354	0.066354	0.338604	0.0920563	36.53	8563914	868294	0.661396	0.325705
2010	85	SC Firm 85	1	US	1	MAN	3000	CGOODS	1	0.389857	0.0830534	0.0162731	0.00233947	0.397801	4.69405	15.0986	0.222314	0.0616521	2.53192	0.0379099	0.137511	0.175421	0.175421	0.389857	0.0830534	55.31	10618941	961822	0.610143	0.379764
2011	85	SC Firm 85	1	US	1	MAN	3000	CGOODS	1	0.388046	0.0509703	0.0147581	0.0012671	0.397801	7.29543	15.2407	0.220995	0.0205094	1.60145	0.0230445	0.198427	0.221471	0.221471	0.388046	0.0509703	61.04	19039074	1022547	0.611954	0.37888
2012	85	SC Firm 85	1	US	1	MAN	3000	CGOODS	1	0.358014	0.0624899	0.0115856	0.00139905	0.397801	5.72915	15.3764	0.207597	0.00576012	2.32108	0.0286191	0.103777	0.132396	0.132396	0.358014	0.0624899	55.51	16673729	1111390	0.641986	0.350489
2013	85	SC Firm 85	1	US	1	MAN	3000	CGOODS	1	0.317886	0.0652129	0.000408689	6.12e-05	0.397801	4.87458	15.4399	0.196713	0.0391809	2.21931	0.00321329	0.0369946	0.0402079	0.0402079	0.317886	0.0652129	56.13	16093785	1122739	0.682114	0.317607
2014	85	SC Firm 85	1	US	1	MAN	3000	CGOODS	1	0.339185	0.116123	0.0548526	0.0146373	0.393363	2.92092	15.3854	0.194888	0.0636252	2.3882	0.0326876	0.0352338	0.0679214	0.0679214	0.339185	0.116123	37.56	9457224	1242478	0.660815	0.300834
2010	86	SC Firm 86	1	US	1	MAN	1	OILGAS	1	0.0846403	0.0244462	0.00200292	0.000804963	-0.0340192	2.4678		0.265551	0.0239898	2.53192	-0.0246867	0.0652343	0.0405476	0.0405476	0.0846403	0.0244462	12.21	4282462	27409	0.91536	0.0775952
2011	86	SC Firm 86	1	US	1	MAN	1	OILGAS	1	0.177627	0.0694714	0.0599015	0.0215497	-0.0340192	2.55683		0.341513	0.0173425	1.60145	0.166784	0.195225	0.362009	0.362009	0.177627	0.0694714	15.52	6014491	449030	0.822373	0.125226
2012	86	SC Firm 86	1	US	1	MAN	1	OILGAS	1	0.329616	0.11591	0.310044	0.107002	-0.0340192	2.84371		0.274154	0.0116522	2.32108	0.217679	0.222688	0.440367	0.440367	0.329616	0.11591	24.56	10085198	1322241	0.670384	0.0775952
2013	86	SC Firm 86	1	US	1	MAN	1	OILGAS	1	0.414051	0.183505	0.362349	0.15307	-0.0340192	2.25635		0.406276	0.0534523	2.21931	0.0501658	0.0079677	0.0581335	0.0581335	0.414051	0.183505	16.45	6694325	1504527	0.585949	0.0810824
2004	87	SC Firm 87	1	US	1	MAN	3000	CGOODS	1	0.480392	0.130851	0.305252	0.0667703	0.224897	3.67128	16.8948	0.193728	0.0108989	3.78574	0.0696225	-0.0161572	0.0534652	0.0534652	0.480392	0.130851	20.82	100324858	15104000	0.519608	0.264877
2005	87	SC Firm 87	1	US	1	MAN	3000	CGOODS	1	0.432256	0.117544	0.254385	0.0563272	0.241343	3.67738	16.9555	0.198151	0.0093171	3.34522	-0.081014	-0.0619839	-0.142998	-0.142998	0.432256	0.117544	20.155	95494390	12720000	0.567744	0.250518
2006	87	SC Firm 87	1	US	1	MAN	3000	CGOODS	1	0.415012	0.100058	0.207237	0.0393556	0.248006	4.14773	16.9972	0.230384	0.0049704	2.66663	-0.00951173	-0.0449888	-0.0545006	-0.0545006	0.415012	0.100058	24.125	111843500	12435000	0.584988	0.282382
2007	87	SC Firm 87	1	US	1	MAN	3000	CGOODS	1	0.453789	0.121286	0.283014	0.0615432	0.190506	3.74149	17.1779	0.196284	0.0347175	1.77857	0.166401	0.0771684	0.243569	0.243569	0.453789	0.121286	30.685	142255660	19635000	0.546211	0.281865
2008	87	SC Firm 87	1	US	1	MAN	3000	CGOODS	1	0.473111	0.154804	0.303708	0.0817012	0.243392	3.0562	17.2795	0.205484	0.0349881	-0.291621	-0.0114761	-0.112614	-0.12409	-0.12409	0.473111	0.154804	22.635	104664240	19170000	0.526889	0.264937
2009	87	SC Firm 87	1	US	1	MAN	3000	CGOODS	1	0.446775	0.142109	0.305763	0.0828547	0.197859	3.14388	17.2492	0.196441	0.0293713	-2.77553	0.0529062	0.0524542	0.10536	0.10536	0.446775	0.142109	28.5	131271000	21745000	0.553225	0.235582
2010	87	SC Firm 87	1	US	1	MAN	3000	CGOODS	1	0.516408	0.199876	0.399056	0.134455	0.142003	2.58364	17.3743	0.201958	0.0377111	2.53192	0.218209	0.00818694	0.226396	0.226396	0.516408	0.199876	32.885	150744840	37657000	0.483592	0.253713
2011	87	SC Firm 87	1	US	1	MAN	3000	CGOODS	1	0.54574	0.216078	0.440205	0.152844	0.159514	2.52566	17.6559	0.186798	0.00909831	1.60145	0.0748743	-0.0409883	0.033886	0.033886	0.54574	0.216078	34.985	158342110	43645000	0.45426	0.247218
2012	87	SC Firm 87	1	US	1	MAN	3000	CGOODS	1	0.561689	0.230048	0.463335	0.167565	0.153236	2.44162	17.6871	0.167986	0.00342586	2.32108	0.0552139	-0.0346044	0.0206095	0.0206095	0.561689	0.230048	36.25	162001250	48403000	0.438311	0.24107
2013	87	SC Firm 87	1	US	1	MAN	3000	CGOODS	1	0.563322	0.218122	0.485302	0.169368	0.145955	2.58261	17.6625	0.166198	0.00440846	2.21931	0.0258398	-0.022886	0.00295375	0.00295375	0.563322	0.218122	41.31	181846620	50730000	0.436678	0.219899
2014	87	SC Firm 87	1	US	1	MAN	3000	CGOODS	1	0.609272	0.233224	0.537252	0.184649	0.135553	2.61239	17.6441	0.159015	0.00701579	2.3882	0.0579964	-0.0556057	0.00239071	0.00239071	0.609272	0.233224	42.22	184332520	56067000	0.390728	0.216881
2004	88	SC Firm 88	1	US	1	MAN	2000	IND	1	0.132196	0.0519067	0	0	0.0992353	2.54679	12.2158	0.0449928	0.0302215	3.78574	0.0430558	0.0990516	0.142107	0.142107	0.132196	0.0519067	13.95	1287725	70501	0.867804	0.132196
2005	88	SC Firm 88	1	US	1	MAN	2000	IND	1	0.102807	0.0392855	0	0	0.0933006	2.61692	12.2871	0.0428208	0.00700208	3.34522	-0.0220702	0.04069	0.0186197	0.0186197	0.102807	0.0392855	15.045	1419375	58041	0.897193	0.102807
2006	88	SC Firm 88	1	US	1	MAN	2000	IND	1	0.103662	0.0492602	0	0	0.103361	2.10438	12.3814	0.0492348	0.00437122	2.66663	-0.00612881	-0.108707	-0.114836	-0.114836	0.103662	0.0492602	11.91	1057679	54801	0.896338	0.103662
2007	88	SC Firm 88	1	US	1	MAN	2000	IND	1	0.1171	0.0674562	0	0	0.0705315	1.73595	12.3269	0.0493674	0.0226118	1.77857	0.0155316	-0.0101289	0.00540269	0.00540269	0.1171	0.0674562	10.075	873442	63181	0.8829	0.1171
2008	88	SC Firm 88	1	US	1	MAN	2000	IND	1	0.12862	0.0941121	0	0	0.083825	1.36667	12.3995	0.058568	0.00319451	-0.291621	-0.00465988	-0.150373	-0.155033	-0.155033	0.12862	0.0941121	7.4	586894	60972	0.87138	0.12862
2009	88	SC Firm 88	1	US	1	MAN	2000	IND	1	0.10326	0.0607324	0	0	0.00781596	1.70025	12.0767	0.0649648	0.0515494	-2.77553	-0.0353537	-0.00423081	-0.0395845	-0.0395845	0.10326	0.0607324	8.855	702467	45421	0.89674	0.10326
2010	88	SC Firm 88	1	US	1	MAN	2000	IND	1	0.11216	0.0471582	0	0	0.160563	2.37838	12.58	0.0555164	0.112006	2.53192	0.0269591	0.0515772	0.0785363	0.0785363	0.11216	0.0471582	14.71	1208132	59793	0.88784	0.11216
2011	88	SC Firm 88	1	US	1	MAN	2000	IND	1	0.0962622	0.0375151	0	0	0.15544	2.56596	12.682	0.0518794	0.00188624	1.60145	-0.0014578	0.0407171	0.0392593	0.0392593	0.0962622	0.0375151	17.895	1511161	58901	0.903738	0.0962622
2012	88	SC Firm 88	1	US	1	MAN	2000	IND	1	0.0881446	0.0337457	0	0	0.150198	2.61202	12.6894	0.0554808	0.00466605	2.32108	-0.00570582	0.0277563	0.0220505	0.0220505	0.0881446	0.0337457	18.3951	1583998	55320	0.911855	0.0881446
2013	88	SC Firm 88	1	US	1	MAN	2000	IND	1	0.092697	0.0244462	0	0	0.13734	4.76398	12.7767	0.0523264	0.00792004	2.21931	0.0147485	0.0647627	0.0795112	0.0795112	0.092697	0.0244462	38.18	3315208	65787	0.907303	0.092697
2014	88	SC Firm 88	1	US	1	MAN	2000	IND	1	0.103801	0.0244462	0	0	0.190001	4.45652	13.0945	0.0559342	0.0375703	2.3882	0.0237425	0.0373722	0.0611147	0.0611147	0.103801	0.0244462	41.33	3576781	85297	0.896199	0.103801
2005	89	SC Firm 89	1	US	1	MAN	9000	TECH	1	0.179043	0.0244462	0	0	0.228782	7.29543	13.6943	0.168966	0.000834714	3.34522	0.0467736	0.103684	0.150458	0.150458	0.179043	0.0244462	12.5675	7004923	155748	0.820957	0.179043
2006	89	SC Firm 89	1	US	1	MAN	9000	TECH	1	0.190411	0.0244462	0	0	0.221048	7.29543	14.1692	0.166031	0.00629137	2.66663	0.0729528	0.0954456	0.168398	0.168398	0.190411	0.0244462	19.29	10996303	252482	0.809589	0.190411
2007	89	SC Firm 89	1	US	1	MAN	9000	TECH	1	0.193086	0.0350393	0	0	0.23687	5.51055	14.5742	0.193682	0.00866622	1.77857	0.055741	0.0329504	0.0886914	0.0886914	0.193086	0.0350393	16.97	9775127	354951	0.806914	0.201324
2008	89	SC Firm 89	1	US	1	MAN	9000	TECH	1	0.169163	0.0708538	0	0	0.249085	2.38749	14.8509	0.191721	0.0071033	-0.291621	0.0196824	0.0247086	0.044391	0.044391	0.169163	0.0708538	9.03	5267560	401688	0.830837	0.172235
2009	89	SC Firm 89	1	US	1	MAN	9000	TECH	1	0.205217	0.0483851	0	0	0.212046	4.24132	15.0029	0.144242	0.0228475	-2.77553	0.0848875	0.0435385	0.128426	0.128426	0.205217	0.0483851	22.665	13473481	685063	0.794783	0.205217
2010	89	SC Firm 89	1	US	1	MAN	9000	TECH	1	0.216819	0.0427038	0	0	0.21209	5.07728	15.3399	0.124468	0.00196349	2.53192	0.0673421	0.0442192	0.111561	0.111561	0.216819	0.0427038	36.645	22275836	993697	0.783181	0.217898
2011	89	SC Firm 89	1	US	1	MAN	9000	TECH	1	0.281722	0.0737348	0	0	0.228878	3.82075	15.6273	0.137626	0.0129272	1.60145	0.10131	-0.0938229	0.00748756	0.00748756	0.281722	0.0737348	32.155	19492747	1551708	0.718278	0.282329
2012	89	SC Firm 89	1	US	1	MAN	9000	TECH	1	0.255216	0.0694859	0	0	0.232779	3.67292	15.8097	0.148965	0.00172192	2.32108	0.0172816	-0.0230509	-0.00576932	-0.00576932	0.255216	0.0694859	36.9412	22288812	1664411	0.744784	0.255642
2013	89	SC Firm 89	1	US	1	MAN	9000	TECH	1	0.243125	0.0605523	0	0	0.255585	4.01513	15.9952	0.132907	0.0174645	2.21931	0.0385196	0.00875544	0.047275	0.047275	0.243125	0.0605523	50.49	30684187	1977757	0.756875	0.245728
2014	89	SC Firm 89	1	US	1	MAN	9000	TECH	1	0.318031	0.104053	0.170052	0.0485496	0.188464	3.05642	16.144	0.106427	0.0443761	2.3882	0.149264	0.0337671	0.183032	0.183032	0.318031	0.104053	52.66	32090899	3726974	0.681969	0.199779
2004	90	SC Firm 90	1	US	1	MAN	3000	CGOODS	1	0.797646	0.204309	0.676802	0.120034	0.292186	3.90412	16.1749	0.305284	0.0246267	3.78574	0.090189	-0.0436993	0.0464896	0.0464896	0.797646	0.204309	25.58	26942138	6917900	0.202354	0.432658
2005	90	SC Firm 90	1	US	1	MAN	3000	CGOODS	1	0.776093	0.1891	0.644029	0.108514	0.311763	4.10413	16.2489	0.299056	0.0131976	3.34522	-0.0370984	-0.069871	-0.106969	-0.106969	0.776093	0.1891	27.425	28311977	6602300	0.223907	0.4362
2006	90	SC Firm 90	1	US	1	MAN	3000	CGOODS	1	0.811687	0.181514	0.680861	0.0989087	0.315879	4.47177	16.32	0.295043	0.00484637	2.66663	0.0891771	-0.0940687	-0.00489166	-0.00489166	0.811687	0.181514	32.62	33445846	7417200	0.188313	0.44385
2007	90	SC Firm 90	1	US	1	MAN	3000	CGOODS	1	0.747795	0.160049	0.579589	0.0813861	0.322191	4.67228	16.4395	0.29818	0.00654308	1.77857	0.01429	-0.0152591	-0.000969146	-0.000969146	0.747795	0.160049	38.98	39684353	7561700	0.252205	0.426216
2008	90	SC Firm 90	1	US	1	MAN	3000	CGOODS	1	0.799184	0.188354	0.653737	0.0991735	0.364154	4.24299	16.5453	0.312597	0.0283693	-0.291621	0.0414458	-0.168178	-0.126732	-0.126732	0.799184	0.188354	34.27	34366818	7975300	0.200816	0.428256
2009	90	SC Firm 90	1	US	1	MAN	3000	CGOODS	1	0.712772	0.163522	0.498746	0.0726855	0.356745	4.35887	16.5451	0.315789	0.00287196	-2.77553	-0.00352973	-0.0182773	-0.0218071	-0.0218071	0.712772	0.163522	41.075	40595656	7936000	0.287228	0.434345
2010	90	SC Firm 90	1	US	1	MAN	3000	CGOODS	1	0.750895	0.17419	0.551635	0.0792682	0.372538	4.31079	16.5605	0.330559	0.00966111	2.53192	0.0405478	-0.142052	-0.101504	-0.101504	0.750895	0.17419	40.185	39771132	8389000	0.249105	0.454082
2011	90	SC Firm 90	1	US	1	MAN	3000	CGOODS	1	0.79354	0.18545	0.646766	0.097846	0.336765	4.27899	16.633	0.288274	0.0248936	1.60145	0.134235	-0.116001	0.0182333	0.0182333	0.79354	0.18545	46.195	44348870	10097000	0.20646	0.435319
2012	90	SC Firm 90	1	US	1	MAN	3000	CGOODS	1	0.814693	0.182406	0.678164	0.0966004	0.329401	4.46637	16.6537	0.286845	0.00424794	2.32108	0.0608481	-0.108183	-0.0473346	-0.0473346	0.814693	0.182406	52.27	48910538	10912000	0.185307	0.446095
2013	90	SC Firm 90	1	US	1	MAN	3000	CGOODS	1	0.801888	0.156461	0.672972	0.0861734	0.328553	5.12516	16.6731	0.294249	0.000533909	2.21931	0.0154944	-0.052753	-0.0372586	-0.0372586	0.801888	0.156461	65.21	59989716	11127000	0.198112	0.426204
2014	90	SC Firm 90	1	US	1	MAN	3000	CGOODS	1	0.895535	0.161161	0.813873	0.0892523	0.345197	5.55676	16.6649	0.303143	0.0109181	2.3882	0.0688015	-0.165168	-0.0963667	-0.0963667	0.895535	0.161161	69.19	62735413	12053000	0.104465	0.458132
2006	91	SC Firm 91	1	US	1	MAN	9000	TECH	1	0.470937	0.0930057	0.0873902	0.010911	0.131486	5.06352	11.9257	0.031235	0.0178169	2.66663	-0.250069	0.410394	0.160325	0.160325	0.470937	0.0930057	21.18	679882	69717	0.529063	0.420274
2007	91	SC Firm 91	1	US	1	MAN	9000	TECH	1	0.454588	0.146919	0	0	0.133591	3.09413	12.1976	0.0292187	0.00419832	1.77857	0.107444	0.108559	0.216004	0.216004	0.454588	0.146919	13.41	530100	91295	0.545412	0.454588
2008	91	SC Firm 91	1	US	1	MAN	9000	TECH	1	0.462338	0.173374	0	0	0.116374	2.6667	12.3653	0.0303497	0.0133019	-0.291621	0.0212719	0.0300937	0.0513655	0.0513655	0.462338	0.173374	23.7	456275	95698	0.537662	0.462338
2009	91	SC Firm 91	1	US	1	MAN	9000	TECH	1	0.446533	0.121994	0	0	0.12364	3.66029	12.51	0.0222226	0.008687	-2.77553	0.111942	0.100152	0.212094	0.212094	0.446533	0.121994	28.62	919182	127715	0.553467	0.446533
2010	91	SC Firm 91	1	US	1	MAN	9000	TECH	1	0.450714	0.0809192	0	0	0.115463	5.56992	12.6596	0.0186862	0.00488831	2.53192	0.0778221	0.0964616	0.174284	0.174284	0.450714	0.0809192	42.72	1753324	154369	0.549286	0.450714
2011	91	SC Firm 91	1	US	1	MAN	9000	TECH	1	0.468476	0.0838885	0	0	0.123997	5.58451	12.9157	0.0211168	0.00671428	1.60145	0.111709	0.112677	0.224386	0.224386	0.468476	0.0838885	69.6624	2213646	202704	0.531524	0.468476
2012	91	SC Firm 91	1	US	1	MAN	9000	TECH	1	0.414707	0.0618527	0	0	0.142615	6.70474	13.114	0.0349043	0.0145044	2.32108	0.0795779	0.117093	0.196671	0.196671	0.414707	0.0618527	74.862	3804554	250837	0.585293	0.414707
2013	91	SC Firm 91	1	US	1	MAN	9000	TECH	1	0.387625	0.0873641	0	0	0.141693	4.4369	13.2817	0.11769	0.000687655	2.21931	0.0555598	0.11741	0.17297	0.17297	0.387625	0.0873641	51.69	3058755	292806	0.612375	0.387625
2014	91	SC Firm 91	1	US	1	MAN	9000	TECH	1	0.429531	0.134512	0	0	0.0672632	3.19327	13.3172	0.196517	0.0557852	2.3882	0.019132	0.0727084	0.0918404	0.0918404	0.429531	0.134512	39.35	1971831	306456	0.570469	0.429531
2008	92	SC Firm 92	1	US	1	MAN	1000	BMAT	1	0.895332	0.279052	0.852011	0.206672	0.383662	3.20847	13.9705	0.465718	0.111269	-0.291621	-0.0917822	-0.0543399	-0.146122	-0.146122	0.895332	0.279052	58.66	1902790	736500	0.104668	0.318989
2009	92	SC Firm 92	1	US	1	MAN	1000	BMAT	1	0.722953	0.248613	0.638267	0.182824	0.312712	2.90794	13.7779	0.462044	0.0453653	-2.77553	-0.0107591	0.0750149	0.0642558	0.0642558	0.722953	0.248613	67.19	2193295	725700	0.277047	0.288902
2010	92	SC Firm 92	1	US	1	MAN	1000	BMAT	1	0.63421	0.194384	0.544225	0.142494	0.249933	3.26266	13.8821	0.479045	0.0466058	2.53192	-0.0170511	0.0277304	0.0106794	0.0106794	0.63421	0.194384	89.27	2928882	706700	0.36579	0.251099
2011	92	SC Firm 92	1	US	1	MAN	1000	BMAT	1	0.570883	0.232355	0.4827	0.175123	0.232269	2.45695	13.916	0.475653	0.0174433	1.60145	-0.0153463	0.0172543	0.00190792	0.00190792	0.570883	0.232355	68.85	2273648	688200	0.429117	0.229117
2012	92	SC Firm 92	1	US	1	MAN	1000	BMAT	1	0.552976	0.2244	0.453417	0.162495	0.152007	2.46424	13.7557	0.496079	0.0538701	2.32108	0.0238352	0.0319852	0.0558204	0.0558204	0.552976	0.2244	74.71	2485788	719200	0.447024	0.242042
2013	92	SC Firm 92	1	US	1	MAN	1000	BMAT	1	0.549687	0.223695	0.430706	0.151531	0.188141	2.45731	13.9374	0.482133	0.0238731	2.21931	0.0377278	-0.00448462	0.0332432	0.0332432	0.549687	0.223695	80.05	2679826	772200	0.450313	0.264806
2014	92	SC Firm 92	1	US	1	MAN	1000	BMAT	1	0.546482	0.234645	0.457594	0.176715	0.186721	2.32897	14.0643	0.428109	0.00205269	2.3882	0.0748229	-0.0165527	0.0582702	0.0582702	0.546482	0.234645	86.83	2918293	894700	0.453518	0.218177
2010	93	SC Firm 93	1	US	1	MAN	1	OILGAS	1	0.450484	0.413332	0.215474	0.190967	0.129125	1.08989	17.942	0.528129	0.012115	2.53192	-0.0111442	-0.0144901	-0.0256343	-0.0256343	0.450484	0.413332	51.914	99947356	70417000	0.549516	0.410456
2011	93	SC Firm 93	1	US	1	MAN	1	OILGAS	1	0.45651	0.427475	0.213622	0.194506	0.146766	1.06792	17.9873	0.395575	0.0171772	1.60145	-0.00304118	-0.0735496	-0.0765907	-0.0765907	0.45651	0.427475	55.5503	93686770	69951000	0.54349	0.426601
2012	93	SC Firm 93	1	US	1	MAN	1	OILGAS	1	0.477805	0.441695	0.262072	0.234931	0.174128	1.08175	17.9114	0.574191	0.0111334	2.32108	-0.119332	-0.0716725	-0.191004	-0.191004	0.477805	0.441695	57.99	70748802	55972000	0.522195	0.404903
2013	93	SC Firm 93	1	US	1	MAN	1	OILGAS	1	0.429852	0.369446	0.24347	0.200065	0.167326	1.1635	17.8218	0.61688	0.00961737	2.21931	-0.0442583	0.00267667	-0.0415816	-0.0415816	0.429852	0.369446	70.65	86612607	50747000	0.570148	0.375285
2014	93	SC Firm 93	1	US	1	MAN	1	OILGAS	1	0.425248	0.3682	0.251993	0.209708	0.138649	1.15494	17.7738	0.647371	0.0262882	2.3882	-0.0102026	-0.0315173	-0.0417199	-0.0417199	0.425248	0.3682	69.06	85037217	49558000	0.574752	0.360935
2007	94	SC Firm 94	1	US	1	MAN	1	OILGAS	1	0.344731	0.096378	0.155726	0.0360465	0.306547	3.57686	13.2746	0.84819	0.0572922	1.77857	0.0748249	0.410394	0.485219	0.485219	0.344731	0.096378	13.065	4412417	470617	0.655269	0.422687
2008	94	SC Firm 94	1	US	1	MAN	1	OILGAS	1	0.370697	0.189574	0.212552	0.096812	0.31869	1.95542	13.7752	0.873307	0.00956788	-0.291621	0.158313	0.0807598	0.239073	0.239073	0.370697	0.189574	10.355	3511549	821419	0.629303	0.401994
2009	94	SC Firm 94	1	US	1	MAN	1	OILGAS	1	0.343599	0.0983763	0.256247	0.0670027	0.182673	3.4927	13.3474	0.885766	0.112075	-2.77553	-0.0112366	0.0232068	0.0119701	0.0119701	0.343599	0.0983763	21.445	7289948	795407	0.656401	0.32879
2010	94	SC Firm 94	1	US	1	MAN	1	OILGAS	1	0.501363	0.152231	0.340815	0.0845303	0.164065	3.29344	13.64	0.830225	0.00229776	2.53192	0.279912	0.0287381	0.30865	0.30865	0.501363	0.152231	29.425	10028549	1800789	0.498637	0.405826
2011	94	SC Firm 94	1	US	1	MAN	1	OILGAS	1	0.440602	0.170932	0.284247	0.094165	0.220059	2.57765	14.3162	0.8292	0.0385955	1.60145	0.121658	0.166193	0.287851	0.287851	0.440602	0.170932	33.355	12065950	2487678	0.559398	0.369045
2012	94	SC Firm 94	1	US	1	MAN	1	OILGAS	1	0.515725	0.256826	0.444354	0.20604	0.215944	2.00807	14.7487	0.885766	0.00769845	2.32108	0.243551	0.0578207	0.301371	0.301371	0.515725	0.256826	36.745	13640088	4713734	0.484275	0.266585
2013	94	SC Firm 94	1	US	1	MAN	1	OILGAS	1	0.523504	0.23032	0.453194	0.184168	0.2204	2.27294	15.0457	0.885766	0.000286449	2.21931	0.128758	0.0418247	0.170582	0.170582	0.523504	0.23032	56.26	20890312	6251252	0.476496	0.274029
2011	95	SC Firm 95	1	US	0	SERV	4000	HCARE	1	0.254105	0.167453	0.162714	0.102926	0.124101	1.51747	14.1013	0.232121	0.00800718	1.60145	-0.065207	0.037349	-0.0278581	-0.0278581	0.254105	0.167453	70.52	3315736	666903	0.745895	0.116821
2012	95	SC Firm 95	1	US	0	SERV	4000	HCARE	1	0.243988	0.133718	0.143875	0.0743986	0.134159	1.82464	14.1837	0.217671	0.00681976	2.32108	0.0172568	0.00701201	0.0242688	0.0242688	0.243988	0.133718	92.48	4649318	717662	0.756012	0.127466
2013	95	SC Firm 95	1	US	0	SERV	4000	HCARE	1	0.225625	0.102448	0.124242	0.0526508	0.144188	2.20233	14.2778	0.235832	0.00557537	2.21931	-0.0031298	-0.0279024	-0.0310322	-0.0310322	0.225625	0.102448	123.84	6201434	707843	0.774375	0.123697
2014	95	SC Firm 95	1	US	0	SERV	4000	HCARE	1	0.407985	0.187334	0.343718	0.149073	0.0997427	2.17785	14.3565	0.210241	0.0250944	2.3882	0.249217	-0.0127821	0.236435	0.236435	0.407985	0.187334	162.09	7890638	1818937	0.592015	0.11352
2004	96	SC Firm 96	1	US	0	SERV	5000	CSERV	1	0.095695	0.0311347	2.62883e-05	7.98322e-06	0.228981	3.07358	12.8765	0.38285	0.0214594	3.78574	0.0133101	-0.00335055	0.00995953	0.00995953	0.095695	0.0311347	13.16	2004188	64405	0.904305	0.105114
2005	96	SC Firm 96	1	US	0	SERV	5000	CSERV	1	0.102417	0.0354751	0	0	0.235533	2.88702	13.0119	0.372098	0.00863507	3.34522	0.0212544	0.00191802	0.0231725	0.0231725	0.102417	0.0354751	11.53	2209659	81271	0.897583	0.106044
2006	96	SC Firm 96	1	US	0	SERV	5000	CSERV	1	0.0947072	0.033973	0	0	0.226911	2.78772	13.1779	0.382185	0.00380938	2.66663	0.00387167	0.000856148	0.00472782	0.00472782	0.0947072	0.033973	15	2409455	84735	0.905293	0.0947072
2007	96	SC Firm 96	1	US	0	SERV	5000	CSERV	1	0.118013	0.0459559	0.0102376	0.00370986	0.236098	2.56796	13.2369	0.414611	0.00598861	1.77857	0.0344973	-0.0507037	-0.0162064	-0.0162064	0.118013	0.0459559	21.275	2485719	119736	0.881987	0.122687
2008	96	SC Firm 96	1	US	0	SERV	5000	CSERV	1	0.149759	0.0377293	0.021073	0.00476901	0.29377	3.96932	13.5732	0.533691	0.034352	-0.291621	0.0245449	0.111874	0.136419	0.136419	0.149759	0.0377293	13.595	3652442	143207	0.850241	0.146143
2009	96	SC Firm 96	1	US	0	SERV	5000	CSERV	1	0.118688	0.0406466	0	0	0.252473	2.92001	13.5186	0.501767	0.0253404	-2.77553	-0.016664	-0.0124713	-0.0291352	-0.0291352	0.118688	0.0406466	18.31	2963886	125576	0.881312	0.129082
2010	96	SC Firm 96	1	US	0	SERV	5000	CSERV	1	0.107282	0.0411195	0.000888013	0.000317056	0.22971	2.60904	13.5579	0.466722	0.0130195	2.53192	0.00508947	0.0196605	0.0247499	0.0247499	0.107282	0.0411195	18.675	3074190	131830	0.892718	0.114422
2011	96	SC Firm 96	1	US	0	SERV	5000	CSERV	1	0.478781	0.153287	0.399322	0.115842	0.288036	3.12342	13.6788	0.553641	0.0363074	1.60145	0.357215	-0.0384919	0.318723	0.318723	0.478781	0.153287	23.945	2867940	519207	0.521219	0.141556
2012	96	SC Firm 96	1	US	0	SERV	5000	CSERV	1	0.507536	0.165391	0.43867	0.130635	0.301041	3.06871	13.7367	0.508807	0.00945599	2.32108	0.057617	-0.00470537	0.0529116	0.0529116	0.507536	0.165391	29.5	2955594	585697	0.492464	0.128911
2013	96	SC Firm 96	1	US	0	SERV	5000	CSERV	1	0.422643	0.121453	0.335353	0.0869957	0.256014	3.47989	13.8609	0.507701	0.032363	2.21931	-0.016252	0.0257403	0.00948833	0.00948833	0.422643	0.121453	36.65	4079842	564009	0.577357	0.137381
2014	96	SC Firm 96	1	US	0	SERV	5000	CSERV	1	0.329129	0.10537	0.230558	0.067109	0.240791	3.12356	13.9669	0.459504	0.00591793	2.3882	-0.0451791	0.0412628	-0.00391624	-0.00391624	0.329129	0.10537	36.49	4210666	495933	0.670871	0.132999
2004	97	SC Firm 97	1	US	1	MAN	1	OILGAS	1	0.510552	0.262466	0.372987	0.168706	0.163726	1.94521	12.9655	0.204791	0.0250779	3.78574	-0.0201082	-0.10907	-0.129178	-0.129178	0.510552	0.262466	11.675	557791	198501	0.489448	0.219397
2005	97	SC Firm 97	1	US	1	MAN	1	OILGAS	1	0.457029	0.145518	0.292659	0.0772447	0.195912	3.1407	13.0887	0.206137	0.0245903	3.34522	-0.0460136	-0.018373	-0.0643866	-0.0643866	0.457029	0.145518	18.68	1058978	180344	0.542971	0.232377
2006	97	SC Firm 97	1	US	1	MAN	1	OILGAS	1	0.856676	0.198732	0.808233	0.148854	0.274439	4.3107	13.2633	0.175043	0.0605009	2.66663	0.364544	-0.208	0.156544	0.156544	0.856676	0.198732	40.5	1731209	429379	0.143324	0.252616
2007	97	SC Firm 97	1	US	1	MAN	1	OILGAS	1	0.876893	0.147922	0.829824	0.106221	0.393829	5.92807	13.4158	0.18431	0.0815109	1.77857	0.0262842	0.300959	0.327243	0.327243	0.876893	0.147922	62.36	2549781	442647	0.123107	0.27659
2008	97	SC Firm 97	1	US	1	MAN	1	OILGAS	1	0.643117	0.186628	0.511086	0.117467	0.397801	3.44599	13.5681	0.198382	0.0341306	-0.291621	-0.205622	-0.208	-0.413622	-0.413622	0.643117	0.186628	29.93	1461797	335408	0.356883	0.270049
2009	97	SC Firm 97	1	US	1	MAN	1	OILGAS	1	0.563849	0.13016	0.421451	0.0777611	0.319264	4.33197	13.4524	0.15009	0.085163	-2.77553	0.0542386	0.0208838	0.0751224	0.0751224	0.563849	0.13016	59.06	2480049	371106	0.436151	0.257816
2010	97	SC Firm 97	1	US	1	MAN	1	OILGAS	1	0.517362	0.0739797	0.31979	0.0338521	0.384888	6.9933	13.5857	0.160284	0.0468577	2.53192	-0.0533587	-0.0626937	-0.116052	-0.116052	0.517362	0.0739797	89.05	4210919	336410	0.482638	0.314257
2004	98	SC Firm 98	1	US	1	MAN	9000	TECH	1	0.621187	0.268052	0.421086	0.139741	0.0912999	2.31742	15.1646	0.403378	0.0353217	3.78574	0.0799386	0.0537359	0.133675	0.133675	0.621187	0.268052	11.77	16572160	6069000	0.378813	0.34565
2005	98	SC Firm 98	1	US	1	MAN	9000	TECH	1	0.510395	0.159253	0.247738	0.0564604	0.114571	3.20494	15.337	0.41715	0.0220029	3.34522	-0.0311413	0.107165	0.0760239	0.0760239	0.510395	0.159253	19.66	30197760	5720000	0.489605	0.349157
2006	98	SC Firm 98	1	US	1	MAN	9000	TECH	1	0.445388	0.165783	0.191475	0.0553599	0.113969	2.68658	15.4592	0.397474	0.000179613	2.66663	0.0075775	-0.00734788	0.000229621	0.000229621	0.445388	0.165783	18.71	29281150	5819000	0.554612	0.314045
2007	98	SC Firm 98	1	US	1	MAN	9000	TECH	1	0.375879	0.131971	0.139309	0.0392559	0.122839	2.8482	15.5837	0.393428	0.0100488	1.77857	-0.00657246	0.0170884	0.0105159	0.0105159	0.375879	0.131971	23.99	37616320	5719000	0.624121	0.27486
2008	98	SC Firm 98	1	US	1	MAN	9000	TECH	1	0.30188	0.282659	0.106659	0.0981205	0.098359	1.068	15.5986	0.425789	0.0146217	-0.291621	0.0048816	-0.0516722	-0.0467906	-0.0467906	0.30188	0.282659	9.53	14752440	5813000	0.69812	0.218529
2009	98	SC Firm 98	1	US	1	MAN	9000	TECH	1	0.27011	0.160938	0.114208	0.0626398	0.0671989	1.67835	15.501	0.37544	0.0228107	-2.77553	-0.00286452	0.0189716	0.0161071	0.0161071	0.27011	0.160938	19.31	29988430	5752000	0.72989	0.176004
2010	98	SC Firm 98	1	US	1	MAN	9000	TECH	1	0.24999	0.176368	0.106896	0.0714032	0.0881431	1.41743	15.7074	0.346185	0.0177325	2.53192	0.0273294	0.0227229	0.0500523	0.0500523	0.24999	0.176368	19.32	30158520	6458000	0.75001	0.160221
2011	98	SC Firm 98	1	US	1	MAN	9000	TECH	1	0.243105	0.256103	0.101879	0.108407	0.101336	0.949249	15.8811	0.383187	0.00840475	1.60145	0.0112037	-0.0268601	-0.0156564	-0.0156564	0.243105	0.256103	12.98	19664700	6770000	0.756895	0.157246
2012	98	SC Firm 98	1	US	1	MAN	9000	TECH	1	0.268562	0.298369	0.138631	0.157115	0.0790809	0.900099	15.8965	0.361702	0.0154363	2.32108	0.0380936	-0.00653617	0.0315574	0.0315574	0.268562	0.298369	12.62	18551400	7889000	0.731438	0.150843
2013	98	SC Firm 98	1	US	1	MAN	9000	TECH	1	0.2569	0.22688	0.134655	0.116677	0.0863474	1.13232	15.8721	0.34416	0.00425811	2.21931	-0.0201208	-0.0601166	-0.0802374	-0.0802374	0.2569	0.22688	17.82	24930180	7316000	0.7431	0.141267
2014	98	SC Firm 98	1	US	1	MAN	9000	TECH	1	0.282207	0.225059	0.13135	0.100475	0.10621	1.25393	16.0892	0.424642	0.0106998	2.3882	0.0388517	-0.0427103	-0.00385856	-0.00385856	0.282207	0.225059	22.93	29212820	8484000	0.717793	0.173669
2004	99	SC Firm 99	1	US	1	MAN	2000	IND	1	0.0846403	0.0244462	0	0	0.0849023	3.71497	11.627	0.0579696	0.0204922	3.78574	0.0158021	0.0865053	0.102307	0.102307	0.0846403	0.0244462	46.18	845233	19208	0.91536	0.0934587
2005	99	SC Firm 99	1	US	1	MAN	2000	IND	1	0.0888377	0.0266085	0	0	0.0857578	3.3387	11.8081	0.06105	0.00674859	3.34522	0.0114045	0.0245184	0.0359229	0.0359229	0.0888377	0.0266085	43.17	806157	22037	0.911162	0.0937801
2006	99	SC Firm 99	1	US	1	MAN	2000	IND	1	0.0876607	0.0244462	0	0	0.0940869	3.79805	11.976	0.0668283	0.0089005	2.66663	0.00765329	0.0466894	0.0543427	0.0543427	0.0876607	0.0244462	53.56	1021978	24145	0.912339	0.0919521
2007	99	SC Firm 99	1	US	1	MAN	2000	IND	1	0.118806	0.0398974	0	0	0.0820804	2.9778	12.1694	0.0747103	0.0136533	1.77857	0.0437853	0.0508416	0.0946269	0.0946269	0.118806	0.0398974	47.25	920147	38237	0.881194	0.124402
2008	99	SC Firm 99	1	US	1	MAN	2000	IND	1	0.0922024	0.045284	0	0	0.169111	2.03609	12.2664	0.0504689	0.0616422	-0.291621	-0.0221482	-0.0139839	-0.0361321	-0.0361321	0.0922024	0.045284	32.94	650005	30831	0.907798	0.0925971
2009	99	SC Firm 99	1	US	1	MAN	2000	IND	1	0.112643	0.05026	0	0	0.118343	2.24121	12.2532	0.0473628	0.0261193	-2.77553	0.0364379	0.0908599	0.127298	0.127298	0.112643	0.05026	41.77	861172	45573	0.887357	0.112643
2010	99	SC Firm 99	1	US	1	MAN	2000	IND	1	0.128958	0.0452702	0	0	0.098779	2.84862	12.3294	0.159039	0.0100561	2.53192	0.0252998	0.0242398	0.0495396	0.0495396	0.128958	0.0452702	57.56	1195694	56696	0.871042	0.132256
2004	100	SC Firm 100	1	US	1	MAN	2000	IND	1	0.652701	0.447234	0.287748	0.148157	0.112383	1.45942	14.4523	0.135882	0.00395428	3.78574	0.195445	0.0109827	0.206427	0.206427	0.652701	0.447234	28.84	1707422	1381447	0.347299	0.546112
2005	100	SC Firm 100	1	US	1	MAN	2000	IND	1	0.614534	0.381609	0.262477	0.121077	0.122288	1.61038	14.5388	0.123296	0.0083602	3.34522	-0.0311575	-0.00843801	-0.0395955	-0.0395955	0.614534	0.381609	35.27	2130590	1314786	0.385466	0.510725
2006	100	SC Firm 100	1	US	1	MAN	2000	IND	1	0.586269	0.392016	0.287908	0.155385	0.124067	1.49553	14.6295	0.118824	0.00137379	2.66663	0.0467252	0.0211823	0.0679075	0.0679075	0.586269	0.392016	36.64	2215717	1428648	0.413731	0.45576
2007	100	SC Firm 100	1	US	1	MAN	2000	IND	1	0.681408	0.431707	0.303185	0.133852	0.122071	1.5784	14.7784	0.100679	0.000726469	1.77857	0.184883	0.00302298	0.187906	0.187906	0.681408	0.431707	42.9	2580922	1960609	0.318592	0.553868
2008	100	SC Firm 100	1	US	1	MAN	2000	IND	1	0.725703	0.666306	0.352937	0.291613	0.115227	1.08914	14.7727	0.104817	0.00434057	-0.291621	0.0190471	-0.0883932	-0.0693461	-0.0693461	0.725703	0.666306	17.24	1008364	2013455	0.274297	0.584369
2009	100	SC Firm 100	1	US	1	MAN	2000	IND	1	0.662597	0.500762	0.303911	0.182338	0.0967991	1.32318	14.6023	0.105136	0.0136329	-2.77553	-0.0795817	0.0246707	-0.054911	-0.054911	0.662597	0.500762	30.62	1792089	1797558	0.337403	0.52619
2010	100	SC Firm 100	1	US	1	MAN	2000	IND	1	0.61806	0.411886	0.278839	0.143352	0.11124	1.50056	14.5945	0.103723	0.00974888	2.53192	-0.046055	0.00541767	-0.0406374	-0.0406374	0.61806	0.411886	41.07	2388659	1672901	0.38194	0.48843
2011	100	SC Firm 100	1	US	1	MAN	2000	IND	1	0.69924	0.424901	0.318683	0.129408	0.130643	1.64566	14.7319	0.0999272	0.013701	1.60145	0.110922	-0.0520121	0.0589095	0.0589095	0.69924	0.424901	46.71	2691162	1988310	0.30076	0.573214
2012	100	SC Firm 100	1	US	1	MAN	2000	IND	1	0.669455	0.42264	0.295263	0.131516	0.134968	1.58398	14.7629	0.0928354	0.00469891	2.32108	-0.018571	-0.0190333	-0.0376044	-0.0376044	0.669455	0.42264	46.28	2642874	1934642	0.330545	0.543718
2013	100	SC Firm 100	1	US	1	MAN	2000	IND	1	0.640309	0.368083	0.405964	0.182749	0.14501	1.73958	14.7692	0.0856991	0.0102188	2.21931	0.0968098	0.0485711	0.145381	0.145381	0.640309	0.368083	67.25	3912961	2279247	0.359691	0.415858
2014	100	SC Firm 100	1	US	1	MAN	2000	IND	1	0.679478	0.40732	0.434554	0.199452	0.164614	1.66817	14.8888	0.0841154	0.00922981	2.3882	0.0189768	-0.0849357	-0.0659589	-0.0659589	0.679478	0.40732	58.7	3411749	2344732	0.320522	0.446569
2004	101	SC Firm 101	1	US	1	MAN	9000	TECH	1	0.0846403	0.0271329	0	0	0.227959	2.63987	12.6103	0.435258	0.0487027	3.78574	0.0265271	-0.016422	0.0101051	0.0101051	0.0846403	0.0271329	40.08	1612855	44982	0.91536	0.0778153
2005	101	SC Firm 101	1	US	1	MAN	9000	TECH	1	0.0846403	0.0244462	0	0	0.26973	2.62909	12.8596	0.438237	0.0257668	3.34522	-0.0115075	0.0864552	0.0749478	0.0749478	0.0846403	0.0244462	25.24	2007842	36036	0.91536	0.0829552
2006	101	SC Firm 101	1	US	1	MAN	9000	TECH	1	0.0846403	0.0244462	0	0	0.19509	2.05881	12.955	0.38018	0.047773	2.66663	0.00360031	0.0476316	0.0512319	0.0512319	0.0846403	0.0244462	17.32	1814062	39277	0.91536	0.0806343
2007	101	SC Firm 101	1	US	1	MAN	9000	TECH	1	0.0846403	0.0244462	0	0	0.0884647	2.12915	12.8844	0.333574	0.0682305	1.77857	0.0146959	0.127476	0.142171	0.142171	0.0846403	0.0244462	27.47	2320942	55681	0.91536	0.0897942
2008	101	SC Firm 101	1	US	1	MAN	9000	TECH	1	0.0986891	0.0585044	0	0	0.0860716	1.68687	13.1089	0.26497	0.00390969	-0.291621	0.0562948	0.0683992	0.124694	0.124694	0.0986891	0.0585044	15.87	2085924	129619	0.901311	0.127658
2009	101	SC Firm 101	1	US	1	MAN	9000	TECH	1	0.0975867	0.0486111	0	0	0.0957348	2.0075	13.2486	0.227907	0.011662	-2.77553	0.0053027	0.0380096	0.0433123	0.0433123	0.0975867	0.0486111	56.37	2682597	137067	0.902413	0.128025
2010	101	SC Firm 101	1	US	1	MAN	9000	TECH	1	0.0846403	0.0244462	0	0	0.133013	3.25501	13.6731	0.190856	0.0459248	2.53192	-0.00242682	0.294499	0.292073	0.292073	0.0846403	0.0244462	65.89	7026610	131730	0.91536	0.0778146
2011	101	SC Firm 101	1	US	1	MAN	9000	TECH	1	0.0846403	0.0420166	0	0	0.114138	1.58805	13.803	0.227214	0.0156674	1.60145	0.012885	0.0284135	0.0412985	0.0412985	0.0846403	0.0420166	22.04	3722254	163256	0.91536	0.0775952
2012	101	SC Firm 101	1	US	1	MAN	9000	TECH	1	0.0846403	0.0571806	0	0	0.0686141	1.094	13.9679	0.211997	0.0375311	2.32108	0.00313594	0.0945329	0.0976689	0.0976689	0.0846403	0.0571806	33.98	2833902	171872	0.91536	0.0775952
2013	101	SC Firm 101	1	US	1	MAN	9000	TECH	1	0.0846403	0.0280372	0	0	0.0829731	2.57364	14.1419	0.177838	0.0113686	2.21931	0.0158504	0.0561104	0.0719608	0.0719608	0.0846403	0.0280372	62.52	7635536	220254	0.91536	0.0805128
2014	101	SC Firm 101	1	US	1	MAN	9000	TECH	1	0.102276	0.055481	0	0	0.0896926	1.84345	14.3149	0.181114	0.00580091	2.3882	0.0364182	0.0460709	0.0824891	0.0824891	0.102276	0.055481	32.22	5823127	342050	0.897724	0.105916
2007	102	SC Firm 102	1	US	1	MAN	2000	IND	1	0.584015	0.27096	0.165075	0.0497376	0.148627	2.15535	16.3841	0.200732	0.013539	1.77857	0.0150092	-0.00536913	0.00964002	0.00964002	0.584015	0.27096	63.685	12877107	4786000	0.415985	0.501769
2008	102	SC Firm 102	1	US	1	MAN	2000	IND	1	0.620378	0.495511	0.171194	0.110436	0.160582	1.252	16.4787	0.216105	0.00732022	-0.291621	0.058575	-0.0942599	-0.0356849	-0.0356849	0.620378	0.495511	26.73	5380749	5285000	0.379622	0.541965
2009	102	SC Firm 102	1	US	1	MAN	2000	IND	1	0.572028	0.334276	0.151563	0.0628887	0.100613	1.71125	16.1951	0.213929	0.042495	-2.77553	-0.0274501	0.0285844	0.0011343	0.0011343	0.572028	0.334276	45.86	10043340	5043000	0.427972	0.495576
2010	102	SC Firm 102	1	US	1	MAN	2000	IND	1	0.550471	0.21009	0.144686	0.0354391	0.151317	2.62017	16.3977	0.196212	0.0402916	2.53192	0.0656604	0.00317247	0.0688329	0.0688329	0.550471	0.21009	110.01	21528957	5726000	0.449529	0.475005
2011	102	SC Firm 102	1	US	1	MAN	2000	IND	1	0.529311	0.26949	0.124781	0.0446805	0.213576	1.96412	16.7085	0.196092	0.0458767	1.60145	0.038567	-0.0665924	-0.0280254	-0.0280254	0.529311	0.26949	88.02	16741404	6176000	0.470689	0.462204
2012	102	SC Firm 102	1	US	1	MAN	2000	IND	1	0.473781	0.22564	0.105042	0.0365958	0.179072	2.09972	16.6682	0.217086	0.0218891	2.32108	-0.0184093	-0.0154606	-0.0338699	-0.0338699	0.473781	0.22564	108.35	20402305	5945000	0.526219	0.412018
2013	102	SC Firm 102	1	US	1	MAN	2000	IND	1	0.490087	0.215224	0.188108	0.062012	0.141771	2.2771	16.6663	0.214286	0.0251285	2.21931	0.086434	-0.0105921	0.0758419	0.0758419	0.490087	0.215224	140.97	26319099	7218000	0.509913	0.371945
2014	102	SC Firm 102	1	US	1	MAN	2000	IND	1	0.508811	0.234059	0.17974	0.0607171	0.151686	2.17386	16.7715	0.233646	0.0062772	2.3882	0.0512804	-0.0570487	-0.00576826	-0.00576826	0.508811	0.234059	144.17	26267774	8027000	0.491189	0.401179
2006	103	SC Firm 103	1	US	0	SERV	5000	CSERV	1	0.517957	0.294546	0.337723	0.165381	0.154315	1.75849	17.5956	0.259239	0.00952003	2.66663	0.180047	0.01742	0.197467	0.197467	0.517957	0.294546	30.91	25522912	10656500	0.482043	0.272143
2007	103	SC Firm 103	1	US	0	SERV	5000	CSERV	1	0.365007	0.257953	0.231747	0.154281		1.41501	18.1473	0.106955	0.0220322	1.77857	0.170268	0.410394	0.580663	0.580663	0.365007	0.257953	39.75	57458280	19973900	0.634993	0.236068
2008	103	SC Firm 103	1	US	0	SERV	5000	CSERV	1	0.37211	0.354247	0.234948	0.221348		1.05043	18.2815	0.133288	0.00812061	-0.291621	0.0444538	0.0117668	0.0562206	0.0562206	0.37211	0.354247	28.74	41350106	22683800	0.62789	0.240009
2009	103	SC Firm 103	1	US	0	SERV	5000	CSERV	1	0.360069	0.331273	0.220758	0.199628	0.126766	1.08692	18.3899	0.128535	0.00370034	-2.77553	-0.00792979	-0.0338622	-0.041792	-0.041792	0.360069	0.331273	32.21	44804110	22195000	0.639931	0.238445
2010	103	SC Firm 103	1	US	0	SERV	5000	CSERV	1	0.334797	0.305166	0.195616	0.175061	0.122344	1.0971	18.3775	0.133861	0.00390166	2.53192	-0.0222136	-0.0167125	-0.0389262	-0.0389262	0.334797	0.305166	34.77	47391510	20814000	0.665203	0.23182
2011	103	SC Firm 103	1	US	0	SERV	5000	CSERV	1	0.350758	0.299571	0.192881	0.159088	0.122384	1.17087	18.3899	0.131184	0.000442046	1.60145	0.0282757	-0.0346746	-0.00639883	-0.00639883	0.350758	0.299571	40.78	52932440	22639000	0.649242	0.255303
2012	103	SC Firm 103	1	US	0	SERV	5000	CSERV	1	0.374262	0.293988	0.19171	0.141722	0.135848	1.27305	18.3899	0.130351	0.00762841	2.32108	0.0323915	-0.0509657	-0.0185742	-0.0185742	0.374262	0.293988	48.35	59518850	24784000	0.625738	0.282992
2013	103	SC Firm 103	1	US	0	SERV	5000	CSERV	1	0.415052	0.260094	0.24261	0.136958	0.138845	1.59578	18.3899	0.120446	0.0024656	2.21931	0.0685485	-0.043243	0.0253055	0.0253055	0.415052	0.260094	71.57	84452600	29687000	0.584948	0.282219
2014	103	SC Firm 103	1	US	0	SERV	5000	CSERV	1	0.433944	0.226733	0.234859	0.105067	0.144635	1.9139	18.3899	0.119199	0.00441302	2.3882	0.0337795	-0.0431477	-0.00936822	-0.00936822	0.433944	0.226733	96.31	109793400	32193000	0.566056	0.314597
2007	104	SC Firm 104	1	US	1	MAN	9000	TECH	1	0.5255	0.247639	0.253382	0.091622	0.0235502	2.12205	13.619	0.0902798	0.000594969	1.77857	0.247049	0.0785285	0.325577	0.325577	0.5255	0.247639	5.73378	5948646	1957987	0.4745	0.377224
2008	104	SC Firm 104	1	US	1	MAN	9000	TECH	1	0.287986	0.32879	0.0392609	0.0471577	-0.0340192	0.875897	13.5486	0.319564	0.0818607	-0.291621	-0.250069	-0.208	-0.458069	-0.458069	0.287986	0.32879	4.47	546012	267462	0.712014	0.283209
2009	104	SC Firm 104	1	US	1	MAN	9000	TECH	1	0.264819	0.0707768	0	0	-0.0340192	3.7416	13.4117	0.298759	0.0196519	-2.77553	-0.028288	0.169535	0.141247	0.141247	0.264819	0.0707768	18.58	3172591	241649	0.735181	0.307856
2010	104	SC Firm 104	1	US	1	MAN	9000	TECH	1	0.29319	0.107772	0	0	0.140068	2.72048	13.6849	0.24247	0.129833	2.53192	0.0679399	0.0108734	0.0788133	0.0788133	0.29319	0.107772	16.89	2603999	314535	0.70681	0.343368
2010	105	SC Firm 105	1	US	1	MAN	1000	BMAT	1	0.50954	0.416414	0.26438	0.197974	0.0447481	1.22364	14.0171	0.306541	0.00175266	2.53192	-0.0175563	0.00250415	-0.0150521	-0.0150521	0.50954	0.416414	26.53	2623530	1872000	0.49046	0.352677
2011	105	SC Firm 105	1	US	1	MAN	1000	BMAT	1	0.511465	0.470961	0.270108	0.239353	0.0449572	1.086	14.1633	0.204909	0.00165812	1.60145	-0.0178415	-0.072808	-0.0906495	-0.0906495	0.511465	0.470961	22.325	2031970	1808900	0.488535	0.342325
2012	105	SC Firm 105	1	US	1	MAN	1000	BMAT	1	0.523827	0.399204	0.274358	0.185914	0.0618725	1.31218	14.3509	0.212859	0.00959749	2.32108	0.0628663	0.0504561	0.113322	0.113322	0.523827	0.399204	34.415	3093644	2055600	0.476173	0.361857
2013	105	SC Firm 105	1	US	1	MAN	1000	BMAT	1	0.547286	0.307252	0.371178	0.178012	0.147174	1.78123	14.4756	0.390599	0.0535797	2.21931	-0.219586	-0.208	-0.427586	-0.427586	0.547286	0.307252	46.58	3307588	1467000	0.452714	0.291849
2014	105	SC Firm 105	1	US	1	MAN	1000	BMAT	1	0.551026	0.317356	0.3742	0.184673	0.114303	1.7363	14.5125	0.405247	0.024257	2.3882	0.0208875	-0.0353787	-0.0144912	-0.0144912	0.551026	0.317356	46.17	3279894	1524800	0.448974	0.293907
2004	106	SC Firm 106	1	US	1	MAN	2000	IND	1	0.456117	0.179284	0.226181	0.0707503	0.147532	2.5441	15.7455	0.0886479	0.00689086	3.78574	0.0742734	0.0288094	0.103083	0.103083	0.456117	0.179284	21.756	17735097	3874211	0.543883	0.297144
2005	106	SC Firm 106	1	US	1	MAN	2000	IND	1	0.445565	0.193244	0.170158	0.0575967	0.155277	2.30571	15.8788	0.0816505	0.00495064	3.34522	0.0227595	-0.0453535	-0.022594	-0.022594	0.445565	0.193244	21.1383	17044750	4082759	0.554435	0.331878
2006	106	SC Firm 106	1	US	1	MAN	2000	IND	1	0.483475	0.217857	0.268078	0.0982813	0.133387	2.21923	16.0632	0.0675228	0.0138116	2.66663	0.1661	0.0362923	0.202392	0.202392	0.483475	0.217857	27.4517	22329050	6219491	0.516525	0.294289
2007	106	SC Firm 106	1	US	1	MAN	2000	IND	1	0.479984	0.231114	0.290842	0.117822	0.114996	2.07683	16.2158	0.0634523	0.0120141	1.77857	0.124014	0.0596431	0.183657	0.183657	0.479984	0.231114	33.2498	27899916	8386247	0.520016	0.266714
2008	106	SC Firm 106	1	US	1	MAN	2000	IND	1	0.439194	0.298835	0.210762	0.126888	0.130973	1.46969	16.3569	0.0633874	0.00844643	-0.291621	-0.0402902	-0.0315335	-0.0718237	-0.0718237	0.439194	0.298835	21.4528	18023492	7681566	0.560806	0.289434
2009	106	SC Firm 106	1	US	1	MAN	2000	IND	1	0.406485	0.2471	0.20141	0.107827	0.102125	1.64502	16.1685	0.0583468	0.0186545	-2.77553	0.0144768	0.036316	0.0507927	0.0507927	0.406485	0.2471	28.4976	24269672	7965244	0.593515	0.256796
2010	106	SC Firm 106	1	US	1	MAN	2000	IND	1	0.382863	0.215527	0.170823	0.0836067	0.110796	1.77641	16.3452	0.0508518	0.00574686	2.53192	0.024345	0.0153057	0.0396507	0.0396507	0.382863	0.215527	35.7509	30960501	8506120	0.617137	0.255724
2011	106	SC Firm 106	1	US	1	MAN	2000	IND	1	0.435556	0.287356	0.238865	0.140886	0.116536	1.51574	16.5937	0.0701512	0.00142541	1.60145	0.15154	0.0361553	0.187695	0.187695	0.435556	0.287356	35.6524	32350819	13044664	0.564444	0.258418
2012	106	SC Firm 106	1	US	1	MAN	2000	IND	1	0.42271	0.265959	0.219343	0.12206	0.123181	1.58938	16.7202	0.064992	0.00166254	2.32108	0.0267095	-0.00641492	0.0202945	0.0202945	0.42271	0.265959	42.3675	38431250	13924500	0.57729	0.260508
2013	106	SC Firm 106	1	US	1	MAN	2000	IND	1	0.354373	0.185658	0.135178	0.0609663	0.11718	1.90874	16.7661	0.0637773	0.00446865	2.21931	-0.0472309	0.0214408	-0.0257901	-0.0257901	0.354373	0.185658	58.5111	53893320	12286900	0.645627	0.253457
2014	106	SC Firm 106	1	US	1	MAN	2000	IND	1	0.368018	0.184019	0.129356	0.0544088	0.115839	1.99989	16.768	0.0587132	0.000635126	2.3882	0.0358648	-0.0358161	4.86596e-05	4.86596e-05	0.368018	0.184019	64.961	60365553	13613600	0.631982	0.274121
2004	107	SC Firm 107	1	US	0	SERV	4000	HCARE	1	0.463155	0.222459	0.362133	0.158442	0.125637	2.08199	14.3427	0.142909	0.00217202	3.78574	0.0140518	0.0272316	0.0412834	0.0412834	0.463155	0.222459	28.1	4529720	1295976	0.536845	0.179173
2005	107	SC Firm 107	1	US	0	SERV	4000	HCARE	1	0.465017	0.209233	0.346033	0.138726	0.147793	2.22248	14.355	0.13119	0.0132921	3.34522	-0.0726489	-0.0988457	-0.171495	-0.171495	0.465017	0.209233	26.845	4236141	1120865	0.534983	0.199745
2006	107	SC Firm 107	1	US	0	SERV	4000	HCARE	1	0.391649	0.158633	0.2181	0.0755207	0.169636	2.46891	14.4091	0.151106	0.014901	2.66663	-0.122191	-0.0747097	-0.196901	-0.196901	0.391649	0.158633	29.85	4531230	854324	0.608351	0.246342
2007	107	SC Firm 107	1	US	0	SERV	4000	HCARE	1	0.410722	0.139316	0.23462	0.0664584	0.155371	2.94813	14.5136	0.138815	0.00800071	1.77857	0.0914168	0.00720819	0.098625	0.098625	0.410722	0.139316	45.02	6789016	1098916	0.589278	0.252715
2008	107	SC Firm 107	1	US	0	SERV	4000	HCARE	1	0.414651	0.218549	0.213401	0.0967456	0.165964	1.89729	14.6001	0.152726	0.00655838	-0.291621	0.0263966	-0.0622375	-0.0358409	-0.0358409	0.414651	0.218549	28.24	4196464	1173629	0.585349	0.280244
2009	107	SC Firm 107	1	US	0	SERV	4000	HCARE	1	0.383202	0.18625	0.197698	0.0832238	0.145589	2.05746	14.5853	0.142367	0.0150074	-2.77553	0.00313284	0.00108714	0.00421998	0.00421998	0.383202	0.18625	35.17	5169990	1183303	0.616798	0.254702
2010	107	SC Firm 107	1	US	0	SERV	4000	HCARE	1	0.413166	0.217411	0.242415	0.112106	0.141437	1.90039	14.6135	0.129868	0.00241934	2.53192	0.0499618	-0.0704876	-0.0205258	-0.0205258	0.413166	0.217411	34.17	4845306	1346076	0.586834	0.247639
2004	108	SC Firm 108	1	US	0	SERV	5000	CSERV	1	0.439092	0.167572	0.335158	0.114759	0.154876	2.62031	13.5733	0.324484	0.0078299	3.78574	-0.0307669	0.0134109	-0.017356	-0.017356	0.439092	0.167572	17.36	1928485	388215	0.560908	0.176303
2005	108	SC Firm 108	1	US	0	SERV	5000	CSERV	1	0.418339	0.2135	0.298277	0.138253	0.104789	1.95944	13.5679	0.315116	0.0356828	3.34522	-0.00825463	0.0435269	0.0352723	0.0352723	0.418339	0.2135	20	1402453	380703	0.581661	0.188621
2006	108	SC Firm 108	1	US	0	SERV	5000	CSERV	1	0.338472	0.159641	0.178019	0.0744255	0.127212	2.12021	13.6406	0.312816	0.0211933	2.66663	-0.0978725	0.0054855	-0.092387	-0.092387	0.338472	0.159641	28	1554531	295311	0.661528	0.209603
2007	108	SC Firm 108	1	US	0	SERV	5000	CSERV	1	0.217748	0.0705939	0	0	0.154657	3.08452	13.7467	0.307218	0.0220754	1.77857	-0.1321	0.0166471	-0.115453	-0.115453	0.217748	0.0705939	51.96	2419877	183804	0.782252	0.239479
2008	108	SC Firm 108	1	US	0	SERV	5000	CSERV	1	0.235874	0.0590553	0	0	0.202102	3.99412	13.9034	0.235001	0.0418299	-0.291621	0.0553834	-0.00852256	0.0468608	0.0468608	0.235874	0.0590553	57.41	3827235	240204	0.764126	0.247389
2009	108	SC Firm 108	1	US	0	SERV	5000	CSERV	1	0.31755	0.1133	0.113089	0.0338304	0.20509	2.80274	14.1949	0.21444	0.00483048	-2.77553	0.150079	0.0324263	0.182505	0.182505	0.31755	0.1133	56.73	3564499	455462	0.68245	0.266713
2010	108	SC Firm 108	1	US	0	SERV	5000	CSERV	1	0.248845	0.0979999	0	0	0.290648	2.53924	14.4653	0.238439	0.058342	2.53192	-0.0309523	-0.0122876	-0.0432399	-0.0432399	0.248845	0.0979999	47.98	3728365	405077	0.751155	0.275487
2011	108	SC Firm 108	1	US	0	SERV	5000	CSERV	1	0.211812	0.0880736	0	0	0.304079	2.40494	14.5857	0.253036	0.0131429	1.60145	-0.00708942	-0.041386	-0.0484755	-0.0484755	0.211812	0.0880736	38.46	4058388	391958	0.788188	0.249114
2012	108	SC Firm 108	1	US	0	SERV	5000	CSERV	1	0.227918	0.173218	0	0	0.220099	1.31579	14.5439	0.300157	0.0684186	2.32108	0.0151905	-0.0851929	-0.0700024	-0.0700024	0.227918	0.173218	23.73	2004440	419947	0.772082	0.263845
2013	108	SC Firm 108	1	US	0	SERV	5000	CSERV	1	0.215269	0.169941	0	0	0.18492	1.26673	14.4907	0.307836	0.0279643	2.21931	-0.0108712	-0.0276529	-0.0385241	-0.0385241	0.215269	0.169941	35.5	1952585	399759	0.784731	0.247635
2014	108	SC Firm 108	1	US	0	SERV	5000	CSERV	1	0.208407	0.133859	0	0	0.15112	1.55692	14.4696	0.278247	0.0201856	2.3882	0.0082913	0.00850655	0.0167979	0.0167979	0.208407	0.133859	47.47	2693840	416322	0.791593	0.232396
2004	109	SC Firm 109	1	US	1	MAN	1	OILGAS	1	0.409493	0.211824	0.374252	0.188174	0.054559	1.93318	13.6105	0.637569	0.00959366	3.78574	0.0928577	-0.00885102	0.0840067	0.0840067	0.409493	0.211824	40.05	5149109	1383836	0.590507	0.165723
2005	109	SC Firm 109	1	US	1	MAN	1	OILGAS	1	0.362775	0.127329	0.298422	0.098299	0.141326	2.84912	14.0152	0.638223	0.0627555	3.34522	-0.0208862	0.0251722	0.00428593	0.00428593	0.362775	0.127329	69.56	8968067	1308501	0.637225	0.215126
2006	109	SC Firm 109	1	US	1	MAN	1	OILGAS	1	0.330307	0.116728	0.258386	0.0853831	0.276202	2.8297	14.5346	0.635992	0.0970846	2.66663	0.0136959	0.00498979	0.0186857	0.0186857	0.330307	0.116728	79.94	10329605	1365104	0.669693	0.205433
2007	109	SC Firm 109	1	US	1	MAN	1	OILGAS	1	0.245716	0.0513206	0.133983	0.0250484	0.334032	4.78787	14.7585	0.700239	0.0368033	1.77857	-0.0687176	0.111846	0.0431288	0.0431288	0.245716	0.0513206	142	19719598	1066769	0.754284	0.220608
2008	109	SC Firm 109	1	US	1	MAN	1	OILGAS	1	0.228264	0.121296	0.116317	0.0578749	0.397801	1.88188	15.0808	0.689155	0.0753166	-0.291621	0.0129482	0.0384387	0.0513869	0.0513869	0.228264	0.121296	58.94	8192722	1130920	0.771736	0.219938
2009	109	SC Firm 109	1	US	1	MAN	1	OILGAS	1	0.333255	0.132373	0.264182	0.0987685	0.357865	2.51754	15.1051	0.707514	0.0591775	-2.77553	0.15272	0.0149363	0.167656	0.167656	0.333255	0.132373	98.42	13682956	2087595	0.666745	0.181037
2010	109	SC Firm 109	1	US	1	MAN	1	OILGAS	1	0.345328	0.194419	0.253509	0.134483	0.265176	1.7762	15.0164	0.636807	0.0677626	2.53192	0.0349962	0.000714585	0.0357108	0.0357108	0.345328	0.194419	66.87	9625467	2323014	0.654672	0.20361
2011	109	SC Firm 109	1	US	1	MAN	1	OILGAS	1	0.300723	0.214206	0.234982	0.162971	0.236822	1.40389	15.0162	0.670213	0.0191936	1.60145	-0.0328446	-0.00106359	-0.0339082	-0.0339082	0.300723	0.214206	55.26	7682644	2094279	0.699277	0.163016
2012	109	SC Firm 109	1	US	1	MAN	1	OILGAS	1	0.299635	0.181412	0.22794	0.132648	0.184773	1.65168	14.9096	0.672395	0.034731	2.32108	0.0101816	-0.00458074	0.00560088	0.00560088	0.299635	0.181412	67.96	9782435	2167946	0.700365	0.160716
2013	109	SC Firm 109	1	US	1	MAN	1	OILGAS	1	0.384754	0.289758	0.325736	0.239636	0.140403	1.32785	14.8872	0.651525	0.0256777	2.21931	0.126401	0.00443464	0.130836	0.130836	0.384754	0.289758	56.92	7913898	3228635	0.615246	0.150157
2004	110	SC Firm 110	1	US	0	SERV	5000	CSERV	1	0.710919	0.294529	0.465557	0.128831	0.155593	2.41375	14.5619	0.335774	0.0259457	3.78574	0.364544	0.00356482	0.368109	0.368109	0.710919	0.294529	16.62	1847653	771381	0.289081	0.459099
2005	110	SC Firm 110	1	US	0	SERV	5000	CSERV	1	0.650786	0.216073	0.312496	0.0629928	0.185083	3.01188	14.7806	0.317914	0.0160202	3.34522	0.00135967	0.0236961	0.0250558	0.0250558	0.650786	0.216073	24.495	2804487	772996	0.349214	0.492055
2006	110	SC Firm 110	1	US	0	SERV	5000	CSERV	1	0.592886	0.198021	0.238266	0.0503628	0.165135	2.99405	14.9515	0.292704	0.00980646	2.66663	0.0857587	0.0611088	0.146868	0.146868	0.592886	0.198021	27.76	3660009	903715	0.407114	0.465543
2007	110	SC Firm 110	1	US	0	SERV	5000	CSERV	1	0.563517	0.48118	0.187601	0.142285	0.169341	1.17112	15.1735	0.272899	0.00165971	1.77857	0.11957	0.0562228	0.175792	0.175792	0.563517	0.48118	14.11	1236849	1147115	0.436483	0.462723
2008	110	SC Firm 110	1	US	0	SERV	5000	CSERV	1	0.544522	0.29376	0.207241	0.0833719	0.169334	1.85363	15.2338	0.289542	0.00701603	-0.291621	-0.0401897	0.0310927	-0.00909704	-0.00909704	0.544522	0.29376	24.87	2568269	1068269	0.455478	0.425452
2009	110	SC Firm 110	1	US	0	SERV	5000	CSERV	1	0.517565	0.214702	0.116072	0.0323811	0.155757	2.41062	15.3	0.294969	0.00784292	-2.77553	0.041792	0.0241795	0.0659715	0.0659715	0.517565	0.214702	37.5	4250529	1162106	0.482435	0.454215
2010	110	SC Firm 110	1	US	0	SERV	5000	CSERV	1	0.475048	0.198128	0.093618	0.027428	0.170756	2.39768	15.3989	0.263668	0.0130696	2.53192	0.0276604	0.0378347	0.0654951	0.0654951	0.475048	0.198128	36.88	4994102	1233955	0.524952	0.420827
2011	110	SC Firm 110	1	US	0	SERV	5000	CSERV	1	0.455107	0.18795	0.0898375	0.0266243	0.182834	2.42142	15.4664	0.259652	0.00985373	1.60145	0.0433019	0.02228	0.0655819	0.0655819	0.455107	0.18795	45.49	5891966	1363707	0.544893	0.401324
2012	110	SC Firm 110	1	US	0	SERV	5000	CSERV	1	0.447769	0.169166	0.0101023	0.00255614	0.224658	2.64693	15.5796	0.290925	0.0267847	2.32108	-0.0244604	-0.00583176	-0.0302922	-0.0302922	0.447769	0.169166	58.1	6350743	1293070	0.552231	0.4447
2013	110	SC Firm 110	1	US	0	SERV	5000	CSERV	1	0.436496	0.180179	0.00424297	0.00120752	0.225213	2.42257	15.6422	0.353096	0.00464357	2.21931	0.0155042	-0.0454995	-0.0299952	-0.0299952	0.436496	0.180179	49.65	6100205	1340691	0.563504	0.446667
2004	111	SC Firm 111	1	US	1	MAN	9000	TECH	1	0.409761	0.179873	0.1937	0.0705415	0.155499	2.27805	14.6729	0.125537	0.00313003	3.78574	0.0521617	-0.00323148	0.0489302	0.0489302	0.409761	0.179873	55.73	3989838	875065	0.590239	0.273388
2005	111	SC Firm 111	1	US	1	MAN	9000	TECH	1	0.489989	0.305976	0.295438	0.16137	0.0987776	1.6014	14.7645	0.0939378	0.0355717	3.34522	0.117568	-0.0430317	0.0745358	0.0745358	0.489989	0.305976	38	2611430	1151309	0.510011	0.295497
2006	111	SC Firm 111	1	US	1	MAN	9000	TECH	1	0.605325	0.371035	0.397736	0.202558	0.101466	1.63145	14.8874	0.0801368	0.00119186	2.66663	0.161944	-0.0357274	0.126216	0.126216	0.605325	0.371035	46.6	2664493	1571822	0.394675	0.354849
2007	111	SC Firm 111	1	US	1	MAN	9000	TECH	1	0.555164	0.429719	0.350937	0.246108	0.108433	1.29192	14.8762	0.084809	0.00158954	1.77857	-0.0506123	0.0586922	0.00807986	0.00807986	0.555164	0.429719	28.98	1911687	1440497	0.444836	0.32983
2008	111	SC Firm 111	1	US	1	MAN	9000	TECH	1	0.613108	0.455887	0.385921	0.249403	0.127437	1.34487	14.941	0.0802203	0.0129506	-0.291621	0.0455216	-0.075009	-0.0294873	-0.0294873	0.613108	0.455887	28.09	1857158	1556028	0.386892	0.383875
2009	111	SC Firm 111	1	US	1	MAN	9000	TECH	1	0.5728	0.436785	0.343046	0.231964	0.0971225	1.3114	14.8155	0.0801686	0.0205395	-2.77553	-0.0362454	0.0598685	0.0236232	0.0236232	0.5728	0.436785	28.45	1887021	1463426	0.4272	0.367363
2010	111	SC Firm 111	1	US	1	MAN	9000	TECH	1	0.606205	0.420368	0.362978	0.211633	0.103295	1.44208	14.8536	0.0807456	0.00357758	2.53192	0.0254319	-0.00278039	0.0226515	0.0226515	0.606205	0.420368	32.05	2106233	1527509	0.393795	0.394171
2011	111	SC Firm 111	1	US	1	MAN	9000	TECH	1	0.658775	0.468719	0.422274	0.250383	0.100883	1.40548	14.8579	0.0765435	0.00484568	1.60145	0.0520048	-0.0815033	-0.0294986	-0.0294986	0.658775	0.468719	30.07	1879784	1658428	0.341225	0.422087
2006	112	SC Firm 112	1	US	0	SERV	5000	CSERV	1	0.196135	0.0637605	0.0203323	0.0057596	0.187556	3.07611	12.8778	0.104148	0.0215003	2.66663	0.0268664	0.0589757	0.0858421	0.0858421	0.196135	0.0637605	31.02	2129134	145000	0.803865	0.179451
2007	112	SC Firm 112	1	US	0	SERV	5000	CSERV	1	0.19617	0.0482317	0.0139212	0.00292298	0.201021	4.06724	13.0858	0.0862683	0.0113294	1.77857	0.0499558	0.0605397	0.110495	0.110495	0.19617	0.0482317	49.72	3838929	194541	0.80383	0.184822
2008	112	SC Firm 112	1	US	0	SERV	5000	CSERV	1	0.202177	0.0624783	0.00871782	0.00230744	0.23327	3.23595	13.3696	0.0657975	0.019965	-0.291621	0.0565784	0.0517204	0.108299	0.108299	0.202177	0.0624783	32.76	4053569	270138	0.797823	0.2077
2009	112	SC Firm 112	1	US	0	SERV	5000	CSERV	1	0.14332	0.0497904	0.00546864	0.0017193	0.238518	2.87847	13.4863	0.058292	0.00405456	-2.77553	-0.0275113	0.0288956	0.00138429	0.00138429	0.14332	0.0497904	47.73	4325130	226634	0.85668	0.147193
2010	112	SC Firm 112	1	US	0	SERV	5000	CSERV	1	0.132312	0.0316919	0	0	0.281054	4.17495	13.7351	0.0549705	0.0284121	2.53192	-8.52917e-05	-0.0892899	-0.0893752	-0.0893752	0.132312	0.0316919	66.7	6920069	226488	0.867688	0.139058
2011	112	SC Firm 112	1	US	0	SERV	5000	CSERV	1	0.116857	0.0683289	0	0	0.263711	1.71021	13.7758	0.0621459	0.0217029	1.60145	-0.0033353	-0.0691827	-0.072518	-0.072518	0.116857	0.0683289	30.51	3002488	220203	0.883143	0.117213
2012	112	SC Firm 112	1	US	0	SERV	5000	CSERV	1	0.121294	0.065805	0	0	0.207764	1.84323	13.7462	0.129884	0.0314172	2.32108	0.00899124	-0.104809	-0.0958176	-0.0958176	0.121294	0.065805	29.33	3376376	237833	0.878706	0.122669
2013	112	SC Firm 112	1	US	0	SERV	5000	CSERV	1	0.147781	0.0683862	0	0	0.175113	2.16097	13.7208	0.139773	0.0289379	2.21931	0.0109336	0.00761934	0.0185529	0.0185529	0.147781	0.0683862	38.56	3498818	256835	0.852219	0.147781
2014	112	SC Firm 112	1	US	0	SERV	5000	CSERV	1	0.138101	0.0609744	0	0	0.165987	2.26491	13.7749	0.146045	0.00376792	2.3882	0.00864914	0.0114939	0.020143	0.020143	0.138101	0.0609744	43.12	4219613	273995	0.861899	0.138101
2010	113	SC Firm 113	1	US	0	SERV	5000	CSERV	1	0.512577	0.256555	0.414068	0.188246	0.160167	1.99792	16.3831	0.159705	0.0130668	2.53192	-0.00354811	0.00929341	0.00574531	0.00574531	0.512577	0.256555	41.14	14179453	4893178	0.487423	0.230826
2011	113	SC Firm 113	1	US	0	SERV	5000	CSERV	1	0.449702	0.223505	0.329366	0.147477	0.189968	2.01204	16.5106	0.185267	0.0198551	1.60145	-0.0553476	0.00955234	-0.0457952	-0.0457952	0.449702	0.223505	44.09	15136753	4356942	0.550298	0.247247
2012	113	SC Firm 113	1	US	0	SERV	5000	CSERV	1	0.456735	0.2096	0.329845	0.134385	0.191961	2.17908	16.5895	0.201459	0.000849723	2.32108	0.0364922	0.000675947	0.0371682	0.0371682	0.456735	0.2096	60.32	17856707	4735282	0.543265	0.251756
2013	113	SC Firm 113	1	US	0	SERV	5000	CSERV	1	0.446404	0.192509	0.319045	0.121666	0.191168	2.31888	16.6779	0.191424	0.0015575	2.21931	0.0106761	-0.00284352	0.0078326	0.0078326	0.446404	0.192509	70.7	20349156	4851305	0.553596	0.243531
2004	114	SC Firm 114	1	US	0	SERV	5000	CSERV	1	0.327101	0.180239	0.189341	0.0955478	0.23585	1.81482	14.9553	0.382326	0.0224314	3.78574	0.0720182	-0.0101536	0.0618646	0.0618646	0.327101	0.180239	7.98	2666997	586385	0.672899	0.193406
2005	114	SC Firm 114	1	US	0	SERV	5000	CSERV	1	0.335076	0.160014	0.183643	0.0783726	0.235748	2.09404	15.0375	0.379115	0.00442333	3.34522	0.00901635	-0.102532	-0.0935159	-0.0935159	0.335076	0.160014	10.0333	3163322	602600	0.664924	0.198565
2006	114	SC Firm 114	1	US	0	SERV	5000	CSERV	1	0.378812	0.222249	0.186926	0.0972532	0.251514	1.70445	15.1941	0.380034	0.00539588	2.66663	0.0586548	-0.0177983	0.0408564	0.0408564	0.378812	0.222249	8.64	2495118	713000	0.621188	0.236797
2007	114	SC Firm 114	1	US	0	SERV	5000	CSERV	1	0.447111	0.170931	0.213621	0.0647714	0.276892	2.61573	15.2607	0.415953	0.0142016	1.77857	0.0482743	-0.000895005	0.0473793	0.0473793	0.447111	0.170931	13.8967	3876846	799300	0.552889	0.296918
2008	114	SC Firm 114	1	US	0	SERV	5000	CSERV	1	0.384389	0.152932	0.17596	0.058152	0.259419	2.51345	15.3513	0.348922	0.00348468	-0.291621	-0.00825269	0.0173405	0.00908778	0.00908778	0.384389	0.152932	16.1	4334137	782500	0.615611	0.252935
2009	114	SC Firm 114	1	US	0	SERV	5000	CSERV	1	0.375813	0.12031	0.157659	0.0407815	0.293445	3.12371	15.4702	0.311962	0.0312861	-2.77553	0.0340656	-0.0165087	0.0175569	0.0175569	0.375813	0.12031	28.04	6291851	860500	0.624187	0.258986
2010	114	SC Firm 114	1	US	0	SERV	5000	CSERV	1	0.387104	0.0860863	0.154448	0.0265191	0.332199	4.49669	15.5875	0.311321	0.028698	2.53192	0.0256249	0.000966184	0.0265911	0.0265911	0.387104	0.0860863	41.555	9782873	921500	0.612896	0.275152
2011	114	SC Firm 114	1	US	0	SERV	5000	CSERV	1	0.422572	0.0984559	0.164897	0.0286228	0.397801	4.29199	15.7072	0.354419	0.0503044	1.60145	0.0268402	-0.000128833	0.0267113	0.0267113	0.422572	0.0984559	40.56	9010326	984000	0.577428	0.308554
2012	114	SC Firm 114	1	US	0	SERV	5000	CSERV	1	0.39415	0.0935126	0.139946	0.0251527	0.397801	4.21494	15.8162	0.349092	0.00122555	2.32108	0.0365916	0.000181686	0.0367733	0.0367733	0.39415	0.0935126	56.42	10514812	1084700	0.60585	0.295567
2013	114	SC Firm 114	1	US	0	SERV	5000	CSERV	1	0.577654	0.0986856	0.396702	0.0500069	0.397801	5.85348	15.8748	0.394675	0.0111078	2.21931	0.186334	-0.00183989	0.184494	0.184494	0.577654	0.0986856	70.38	14624069	1601200	0.422346	0.299939
2004	115	SC Firm 115	1	US	1	MAN	2000	IND	1	0.42565	0.15651	0.178429	0.0515717	0.177242	2.71963	14.1626	0.261109	0.00964519	3.78574	0.013026	0.323953	0.336979	0.336979	0.42565	0.15651	16.29	2297671	426335	0.57435	0.326852
2005	115	SC Firm 115	1	US	1	MAN	2000	IND	1	0.501621	0.170872	0.277748	0.0729928	0.180589	2.93565	14.2828	0.247796	0.00353806	3.34522	0.118148	-0.0905572	0.0275911	0.0275911	0.501621	0.170872	15.9	2706088	557689	0.498379	0.336471
2006	115	SC Firm 115	1	US	1	MAN	2000	IND	1	0.477174	0.168388	0.234872	0.0637611	0.211276	2.83377	14.3428	0.282335	0.0217451	2.66663	-0.0189615	-0.0437483	-0.0627098	-0.0627098	0.477174	0.168388	17.355	2648970	536375	0.522826	0.353058
2007	115	SC Firm 115	1	US	1	MAN	2000	IND	1	0.497867	0.18568	0.301427	0.0902728	0.197621	2.68132	14.4672	0.276291	0.00810763	1.77857	0.0912194	-0.02829	0.0629294	0.0629294	0.497867	0.18568	23.19	2880007	656695	0.502133	0.309726
2008	115	SC Firm 115	1	US	1	MAN	2000	IND	1	0.499056	0.180811	0.29303	0.0841076	0.195363	2.7601	14.6186	0.268083	0.000929084	-0.291621	0.0750047	-0.0180883	0.0569164	0.0569164	0.499056	0.180811	16.825	3501509	772849	0.500944	0.314498
2009	115	SC Firm 115	1	US	1	MAN	2000	IND	1	0.476735	0.177844	0.292601	0.089425	0.180403	2.68063	14.4407	0.285659	0.0157252	-2.77553	-0.102614	-0.122575	-0.22519	-0.22519	0.476735	0.177844	21.27	2939989	635962	0.523265	0.267355
2010	115	SC Firm 115	1	US	1	MAN	2000	IND	1	0.497362	0.170527	0.292582	0.0791304	0.203176	2.91662	14.4452	0.244008	0.0192219	2.53192	0.0732475	-0.0500958	0.0231516	0.0231516	0.497362	0.170527	29.14	3627696	745797	0.502638	0.294194
2011	115	SC Firm 115	1	US	1	MAN	2000	IND	1	0.451995	0.157432	0.21997	0.0600479	0.217987	2.87104	14.6458	0.226814	0.0136545	1.60145	0.019923	0.00443255	0.0243556	0.0243556	0.451995	0.157432	34.04	4175504	780186	0.548005	0.303943
2012	115	SC Firm 115	1	US	1	MAN	2000	IND	1	0.47134	0.139271	0.247594	0.0563552	0.245129	3.38433	14.7291	0.22248	0.0189794	2.32108	0.0203869	0.305149	0.325535	0.325535	0.47134	0.139271	32.84	5039716	815457	0.52866	0.300039
2013	115	SC Firm 115	1	US	1	MAN	2000	IND	1	0.364063	0.106993	0.159637	0.0382358	0.23608	3.4027	14.7063	0.240474	0.00750851	2.21931	-0.103634	0.0181984	-0.0854357	-0.0854357	0.364063	0.106993	43.46	5298027	634765	0.635937	0.256798
2014	115	SC Firm 115	1	US	1	MAN	2000	IND	1	0.472373	0.14418	0.29593	0.0732958	0.217921	3.27628	14.7211	0.232528	0.0112135	2.3882	0.14558	-0.129724	0.0158566	0.0158566	0.472373	0.14418	38.63	5446336	917542	0.527627	0.262128
2004	116	SC Firm 116	1	US	1	MAN	2000	IND	1	0.407843	0.215925	0.242479	0.113465	0.118499	1.88882	15.315	0.126161	0.00927904	3.78574	0.0290488	0.0258964	0.0549452	0.0549452	0.407843	0.215925	34.7884	8534650	2350338	0.592157	0.269283
2005	116	SC Firm 116	1	US	1	MAN	2000	IND	1	0.440171	0.260715	0.294571	0.157749	0.121031	1.68832	15.4516	0.1074	0.00236497	3.34522	0.0830037	-0.0159242	0.0670795	0.0670795	0.440171	0.260715	33.5856	8213439	2896543	0.559829	0.260259
2006	116	SC Firm 116	1	US	1	MAN	2000	IND	1	0.45666	0.258016	0.29942	0.150259	0.144055	1.76989	15.6749	0.106887	0.0140801	2.66663	0.076868	0.00562973	0.0824977	0.0824977	0.45666	0.258016	40.6611	10015578	3482789	0.54334	0.268085
2007	116	SC Firm 116	1	US	1	MAN	2000	IND	1	0.47158	0.298467	0.329021	0.189475	0.154835	1.58001	15.8057	0.110584	0.00441588	1.77857	0.0399224	-0.0407631	-0.000840686	-0.000840686	0.47158	0.298467	38.2307	8943253	3804899	0.52842	0.251795
2008	116	SC Firm 116	1	US	1	MAN	2000	IND	1	0.478987	0.38145	0.336782	0.254081	0.167171	1.2557	15.8396	0.110631	0.00666211	-0.291621	-0.00367007	-0.0725888	-0.0762589	-0.0762589	0.478987	0.38145	27.3065	6123009	3775967	0.521013	0.254299
2009	116	SC Firm 116	1	US	1	MAN	2000	IND	1	0.444845	0.310791	0.29837	0.193102	0.123648	1.43134	15.4915	0.105161	0.0357151	-2.77553	-0.0341921	0.0129551	-0.0212371	-0.0212371	0.444845	0.310791	34.5147	7775911	3506451	0.555155	0.245853
2010	116	SC Firm 116	1	US	1	MAN	2000	IND	1	0.435516	0.254823	0.272262	0.142235	0.135325	1.70909	15.6254	0.091792	0.0176821	2.53192	0.0258238	-0.00522086	0.0206029	0.0206029	0.435516	0.254823	48.4831	10900234	3727470	0.564484	0.259934
2011	116	SC Firm 116	1	US	1	MAN	2000	IND	1	0.44434	0.283721	0.292949	0.170284	0.149455	1.56611	15.8128	0.102173	0.00731154	1.60145	0.0519975	-0.0240286	0.0279689	0.0279689	0.44434	0.283721	48.1513	10657465	4221475	0.55566	0.250801
2012	116	SC Firm 116	1	US	1	MAN	2000	IND	1	0.484728	0.306015	0.342246	0.196075	0.124746	1.584	15.7066	0.111744	0.0114201	2.32108	0.0805246	-0.0447833	0.0357413	0.0357413	0.484728	0.306015	54.5051	11480713	5062469	0.515272	0.260878
2013	116	SC Firm 116	1	US	1	MAN	2000	IND	1	0.450293	0.229583	0.321577	0.147077	0.133468	1.96135	15.7833	0.0725782	0.00362396	2.21931	-0.0160711	-0.0156253	-0.0316965	-0.0316965	0.450293	0.229583	80.078	16402815	4888014	0.549707	0.244059
2014	116	SC Firm 116	1	US	1	MAN	2000	IND	1	0.520394	0.288067	0.410104	0.205879	0.172433	1.8065	15.8636	0.0920829	0.0217682	2.3882	-0.017319	-0.0800413	-0.0973602	-0.0973602	0.520394	0.288067	71.72	11691210	4730578	0.479606	0.259468
2004	117	SC Firm 117	1	US	0	SERV	5000	CSERV	1	0.321817	0.0922433	0.146727	0.0355158	0.362682	3.48879	13.8908	0.0705267	0.129833	3.78574	-0.247567	0.410394	0.162827	0.162827	0.321817	0.0922433	37.51	3861656	392409	0.678183	0.205198
2005	117	SC Firm 117	1	US	0	SERV	5000	CSERV	1	0.27948	0.126546	0.112162	0.0450601	0.0934102	2.20852	13.044	0.0649517	0.129833	3.34522	-0.0193447	0.0111485	-0.00819616	-0.00819616	0.27948	0.126546	24.56	2533170	367006	0.72052	0.188455
2006	117	SC Firm 117	1	US	0	SERV	5000	CSERV	1	0.193055	0.0749284	0.104013	0.0378163	0.00187119	2.57653	12.8862	0.0651449	0.0624742	2.66663	-0.0935634	0.0550408	-0.0385226	-0.0385226	0.193055	0.0749284	29.49	3051962	247201	0.806945	0.0993784
2007	117	SC Firm 117	1	US	0	SERV	5000	CSERV	1	0.232876	0.1119	0.064355	0.0277559	0.22308	2.08111	13.5505	0.065351	0.129833	1.77857	0.0467004	-0.173922	-0.127222	-0.127222	0.232876	0.1119	25.54	2454049	309209	0.767124	0.180112
2008	117	SC Firm 117	1	US	0	SERV	5000	CSERV	1	0.221051	0.11339	0.0644273	0.0301006	0.134211	1.94948	13.3848	0.0879846	0.0621102	-0.291621	-0.0156984	-0.110042	-0.12574	-0.12574	0.221051	0.11339	25.26	2257433	288706	0.778949	0.16741
2009	117	SC Firm 117	1	US	0	SERV	5000	CSERV	1	0.173532	0.0651268	0	0	0.140849	2.66452	13.4942	0.115846	0.00497941	-2.77553	-0.0334857	-0.0113273	-0.0448129	-0.0448129	0.173532	0.0651268	39.95	3473930	242007	0.826468	0.173532
2010	117	SC Firm 117	1	US	0	SERV	5000	CSERV	1	0.283047	0.16647	0	0	0.119008	1.70028	13.5732	0.099553	0.0167232	2.53192	0.14522	-0.0366466	0.108574	0.108574	0.283047	0.16647	29.47	2488494	496996	0.716953	0.283047
2011	117	SC Firm 117	1	US	0	SERV	5000	CSERV	1	0.237346	0.232404	0	0	0.063613	1.02126	13.4674	0.0969755	0.0376164	1.60145	-0.0420363	0.00619086	-0.0358455	-0.0358455	0.237346	0.232404	16.595	1394522	422217	0.762654	0.237346
2012	117	SC Firm 117	1	US	0	SERV	5000	CSERV	1	0.308128	0.29882	0.109227	0.105015	-0.0312639	1.03115	13.5276	0.0971704	0.0672865	2.32108	0.091038	0.01303	0.104068	0.104068	0.308128	0.29882	16.57	1406200	599276	0.691872	0.223291
2013	117	SC Firm 117	1	US	0	SERV	5000	CSERV	1	0.382298	0.224593	0.175974	0.0908616	0.038833	1.70219	13.4687	0.0820806	0.0478208	2.21931	0.118791	0.00180061	0.120591	0.120591	0.382298	0.224593	35.5	3001724	869433	0.617702	0.250385
2014	117	SC Firm 117	1	US	0	SERV	5000	CSERV	1	0.404446	0.293995	0.305083	0.212103	-0.0340192	1.37569	13.4366	0.0916924	0.129833	2.3882	-0.0369568	0.0395415	0.00258465	0.00258465	0.404446	0.293995	22.33	1913061	796639	0.595554	0.151468
2004	118	SC Firm 118	1	US	1	MAN	1	OILGAS	1	0.264961	0.160817	0.115272	0.0647785	0.099132	1.64759	12.3086	0.372922	0.00212652	3.78574	0.0219063	0.0206249	0.0425313	0.0425313	0.264961	0.160817	12.13	419719	80433	0.735039	0.191491
2005	118	SC Firm 118	1	US	1	MAN	1	OILGAS	1	0.218177	0.0931507	0.0113591	0.00421135	0.146226	2.3422	12.7391	0.272224	0.03857	3.34522	0.0303646	0.184761	0.215125	0.215125	0.218177	0.0931507	23.6	909637	93437	0.781823	0.221717
2006	118	SC Firm 118	1	US	1	MAN	1	OILGAS	1	0.202847	0.0709435	0.00778285	0.0023483	0.231113	2.85928	13.0007	0.217402	0.0642602	2.66663	0.0457932	0.0883088	0.134102	0.134102	0.202847	0.0709435	39.16	1580406	120681	0.797153	0.207952
2007	118	SC Firm 118	1	US	1	MAN	1	OILGAS	1	0.143551	0.0423696	0.00483336	0.00128041	0.22011	3.38806	13.1134	0.202403	0.00566423	1.77857	-0.0288945	0.0245305	-0.00436397	-0.00436397	0.143551	0.0423696	55.66	2270578	100460	0.856449	0.149204
2008	118	SC Firm 118	1	US	1	MAN	1	OILGAS	1	0.16843	0.125286	0.00269953	0.0019105	0.232978	1.34437	13.2044	0.236274	0.00740472	-0.291621	0.0208269	-0.204189	-0.183362	-0.183362	0.16843	0.125286	20.51	800353	114635	0.83157	0.175765
2009	118	SC Firm 118	1	US	1	MAN	1	OILGAS	1	0.128408	0.0447537	0.00145652	0.000463642	0.202217	2.86921	13.1997	0.238243	0.0198128	-2.77553	-0.0118618	0.050401	0.0385392	0.0385392	0.128408	0.0447537	56.48	2239913	104941	0.871592	0.135971
2010	118	SC Firm 118	1	US	1	MAN	1	OILGAS	1	0.117429	0.0345554	0.000389258	0.000104743	0.183699	3.39827	13.2468	0.260564	0.013084	2.53192	0.00679563	0.0238606	0.0306562	0.0306562	0.117429	0.0345554	77.72	3112044	111387	0.882571	0.126731
2011	118	SC Firm 118	1	US	1	MAN	1	OILGAS	1	0.139061	0.0540183	6.09681e-05	2.1555e-05	0.144928	2.57432	13.3069	0.252887	0.02684	1.60145	0.0364808	0.0022351	0.0387159	0.0387159	0.139061	0.0540183	65.82	2644347	151000	0.860939	0.147862
2012	118	SC Firm 118	1	US	1	MAN	1	OILGAS	1	0.12594	0.0498391	0	0	0.152598	2.52694	13.5049	0.240353	0.00535141	2.32108	0.00332048	0.0181015	0.021422	0.021422	0.12594	0.0498391	73.05	2956703	155089	0.87406	0.134001
2013	118	SC Firm 118	1	US	1	MAN	1	OILGAS	1	0.106989	0.0323419	0	0	0.181045	3.30807	13.679	0.218217	0.0203207	2.21931	-0.00404208	0.000842637	-0.00319944	-0.00319944	0.106989	0.0323419	109.93	4471279	149443	0.893011	0.110815
2014	118	SC Firm 118	1	US	1	MAN	1	OILGAS	1	0.137065	0.0623497	0	0	0.213837	2.19833	13.744	0.213576	0.0228389	2.3882	0.0339479	-0.141773	-0.107825	-0.107825	0.137065	0.0623497	76.73	2987291	198642	0.862935	0.140803
2004	119	SC Firm 119	1	US	0	SERV	5000	CSERV	1	0.547776	0.154533	0.235218	0.0443511	0.188106	3.54472	13.7758	0.227738	0.0322087	3.78574	0.175244	0	0.175244	0.175244	0.547776	0.154533	13.11	1185104	216611	0.452224	0.40869
2005	119	SC Firm 119	1	US	0	SERV	5000	CSERV	1	0.399829	0.101222	0	0	0.17639	3.95001	13.9501	0.188927	0.00268552	3.34522	-0.0268103	0.349147	0.322336	0.322336	0.399829	0.101222	19.285	1802478	202999	0.600171	0.399829
2006	119	SC Firm 119	1	US	0	SERV	5000	CSERV	1	0.384223	0.210068	0	0	0.199572	1.82904	14.0616	0.192128	0.0194258	2.66663	0.0505094	0.00723159	0.057741	0.057741	0.384223	0.210068	9.38	878885	233724	0.615777	0.384223
2007	119	SC Firm 119	1	US	0	SERV	5000	CSERV	1	0.375283	0.372159	0	0	0.156332	1.00839	14.156	0.277817	0.0320616	1.77857	0.0384475	0.00757622	0.0460237	0.0460237	0.375283	0.372159	6.23	439304	260402	0.624717	0.375283
2008	119	SC Firm 119	1	US	0	SERV	5000	CSERV	1	0.354429	0.19462	0	0	0.114322	1.82113	14.196	0.323581	0.0397989	-0.291621	-0.00664035	0.00721301	0.000572659	0.000572659	0.354429	0.19462	12.94	1057779	255613	0.645571	0.354429
2009	119	SC Firm 119	1	US	0	SERV	5000	CSERV	1	0.383042	0.181401	0	0	0.086268	2.11158	14.2871	0.242636	0.0230577	-2.77553	0.0825877	0.0147586	0.0973464	0.0973464	0.383042	0.181401	19.55	1470564	325875	0.616958	0.383042
2010	119	SC Firm 119	1	US	0	SERV	5000	CSERV	1	0.764583	0.270959	0.360989	0.0607217	0.209161	2.82177	14.4157	0.203885	0.0929773	2.53192	0.364544	0.0172812	0.381826	0.381826	0.764583	0.270959	22.105	2142508	796296	0.235417	0.631592
2011	119	SC Firm 119	1	US	0	SERV	5000	CSERV	1	0.348798	0.121527	0	0	0.187599	2.87013	14.5207	0.195154	0.00508883	1.60145	-0.250069	0.384307	0.134238	0.134238	0.348798	0.121527	32.845	3045512	421313	0.651202	0.348798
2012	119	SC Firm 119	1	US	0	SERV	5000	CSERV	1	0.319724	0.105611	0	0	0.238272	3.02738	14.6299	0.237947	0.0158798	2.32108	-0.0140947	0.042201	0.0281063	0.0281063	0.319724	0.105611	42.73	3417340	403524	0.680276	0.319724
2013	119	SC Firm 119	1	US	0	SERV	5000	CSERV	1	0.297416	0.118531	0	0	0.214944	2.50919	14.6778	0.224184	0.0160033	2.21931	0.0134924	0.0158432	0.0293356	0.0293356	0.297416	0.118531	37.3	3143468	422700	0.702584	0.297416
2004	120	SC Firm 120	1	US	1	MAN	1000	BMAT	1	0.653598	0.323183	0.344399	0.117344	0.107151	2.02238	17.1475	0.286933	0.00463092	3.78574	-0.0971318	0.057729	-0.0394028	-0.0394028	0.653598	0.323183	46.5956	48772407	23289000	0.346402	0.498737
2005	120	SC Firm 120	1	US	1	MAN	1000	BMAT	1	0.695383	0.371987	0.446482	0.173072	0.161515	1.86938	17.1651	0.309663	0.036328	3.34522	-0.0041753	-0.000300381	-0.00447568	-0.00447568	0.695383	0.371987	40.3733	39083431	23150000	0.304617	0.485086
2006	120	SC Firm 120	1	US	1	MAN	1000	BMAT	1	0.695031	0.329642	0.437257	0.143582	0.170595	2.10844	17.1822	0.330365	0.00446768	2.66663	-0.0334833	-0.0673128	-0.100796	-0.100796	0.695031	0.329642	46.2726	44913918	22086000	0.304969	0.466532
2007	120	SC Firm 120	1	US	1	MAN	1000	BMAT	1	0.65023	0.358862	0.380263	0.155935	0.160001	1.81192	17.2382	0.318186	0.00439325	1.77857	0.00313498	0.0580411	0.0611761	0.0611761	0.65023	0.358862	41.8838	39649652	22193000	0.34977	0.459113
2008	120	SC Firm 120	1	US	1	MAN	1000	BMAT	1	0.799359	0.559044	0.5705	0.297105	0.129968	1.42987	17.2761	0.308045	0.0217368	-0.291621	0.186445	-0.143169	0.0432765	0.0432765	0.799359	0.559044	24.034	22830062	28944000	0.200641	0.536717
2004	121	SC Firm 121	1	US	1	MAN	2000	IND	1	0.225473	0.106521	0.123089	0.0543606	0.215192	2.11669	13.3319	0.672254	0.0390997	3.78574	0.0294846	-0.0122513	0.0172333	0.0172333	0.225473	0.106521	40.7866	1475154	175869	0.774527	0.269016
2005	121	SC Firm 121	1	US	1	MAN	2000	IND	1	0.342776	0.0867341	0.255031	0.0586798	0.290111	3.95203	13.6643	0.627238	0.0534997	3.34522	0.144929	0.00124759	0.146177	0.146177	0.342776	0.0867341	43.23	3208326	304699	0.657224	0.252193
2006	121	SC Firm 121	1	US	1	MAN	2000	IND	1	0.31709	0.125919	0.231646	0.0855365	0.325878	2.5182	13.7347	0.672404	0.0263232	2.66663	0.00342286	-0.00165636	0.0017665	0.0017665	0.31709	0.125919	35.48	2138183	308024	0.68291	0.231997
2007	121	SC Firm 121	1	US	1	MAN	2000	IND	1	0.529307	0.277031	0.431917	0.205767	0.157343	1.91064	13.5272	0.631245	0.1184	1.77857	0.253725	0.00224832	0.255974	0.255974	0.529307	0.277031	18.41	1543947	591618	0.470693	0.27917
2008	121	SC Firm 121	1	US	1	MAN	2000	IND	1	0.48408	0.328176	0.392129	0.251407	0.100137	1.47507	13.3023	0.627119	0.0460397	-0.291621	-0.0705608	0.00803249	-0.0625284	-0.0625284	0.48408	0.328176	26.05	1057052	516353	0.51592	0.266101
2009	121	SC Firm 121	1	US	1	MAN	2000	IND	1	0.436812	0.275718	0.346703	0.206647	0.0858996	1.58427	13.056	0.623875	0.0115247	-2.77553	-0.0725239	0.0028527	-0.0696712	-0.0696712	0.436812	0.275718	28.25	1163269	442830	0.563188	0.255608
2010	121	SC Firm 121	1	US	1	MAN	2000	IND	1	0.400845	0.227084	0.327009	0.17586	0.069698	1.76518	13.0437	0.611507	0.0113357	2.53192	-0.0483592	0.0209036	-0.0274556	-0.0274556	0.400845	0.227084	25.66	1344979	395157	0.599155	0.240712
2011	121	SC Firm 121	1	US	1	MAN	2000	IND	1	0.38448	0.194053	0.305659	0.14507	0.0718463	1.98132	13.1124	0.589261	0.000840617	1.60145	-0.0166351	0.0151704	-0.00146476	-0.00146476	0.38448	0.194053	58.5	1573115	378769	0.61552	0.249403
2012	121	SC Firm 121	1	US	1	MAN	2000	IND	1	0.434237	0.162722	0.369403	0.129171	0.0909389	2.66858	13.3732	0.667729	0.0222472	2.32108	0.177659	0.128733	0.306392	0.306392	0.434237	0.162722	77.43	3298418	641035	0.565763	0.196991
2013	121	SC Firm 121	1	US	1	MAN	2000	IND	1	0.353455	0.107453	0.280641	0.0791154	0.153091	3.2894	13.7084	0.65103	0.0384223	2.21931	-0.0706424	0.0249952	-0.0456472	-0.0456472	0.353455	0.107453	76.03	4437764	534257	0.646545	0.197661
2014	121	SC Firm 121	1	US	1	MAN	2000	IND	1	0.376792	0.144533	0.304127	0.108837	0.160446	2.60696	13.8798	0.649009	0.00929924	2.3882	0.0930037	0.015518	0.108522	0.108522	0.376792	0.144533	60.43	4198503	709345	0.623208	0.190822
2004	122	SC Firm 122	1	US	1	MAN	2000	IND	1	0.602645	0.330218	0.329615	0.137807	0.13741	1.82499	16.0889	0.236584	0.0148318	3.78574	0.04	0.0212672	0.0612672	0.0612672	0.602645	0.330218	36.18	11092788	5469000	0.397355	0.407273
2005	122	SC Firm 122	1	US	1	MAN	2000	IND	1	0.63026	0.392614	0.394745	0.19828	0.143179	1.60529	16.2019	0.21286	0.00694235	3.34522	0.0950284	-0.00900372	0.0860247	0.0860247	0.63026	0.392614	33.545	9962865	6440000	0.36974	0.389117
2006	122	SC Firm 122	1	US	1	MAN	2000	IND	1	0.640361	0.399421	0.386432	0.190441	0.132084	1.60322	16.3196	0.198914	0.00642128	2.66663	0.0762897	-0.00805816	0.0682316	0.0682316	0.640361	0.399421	37.57	10992982	7311000	0.359639	0.413857
2007	122	SC Firm 122	1	US	1	MAN	2000	IND	1	0.598213	0.362076	0.387723	0.19446	0.12755	1.65217	16.383	0.173716	0.000179613	1.77857	0.0538347	0.0617275	0.115562	0.115562	0.598213	0.362076	48.475	14154700	8034000	0.401787	0.360462
2004	123	SC Firm 123	1	US	0	SERV	5000	CSERV	1	0.141	0.0244462	0.0177927	0.00159437	0.163766	7.29543	15.0007	0.088821	0.0136404	3.78574	0.0353001	0.138982	0.174282	0.174282	0.141	0.0244462	24.4825	77866827	1126739	0.859	0.142455
2005	123	SC Firm 123	1	US	0	SERV	5000	CSERV	1	0.129385	0.0245173	0	0	0.153639	5.27731	15.3312	0.0679958	0.0072555	3.34522	0.0338099	0.196566	0.230375	0.230375	0.129385	0.0245173	18.1903	60688789	1525323	0.870615	0.147681
2006	123	SC Firm 123	1	US	0	SERV	5000	CSERV	1	0.189536	0.0585145	0	0	0.144107	3.23912	15.6022	0.0739733	0.0119089	2.66663	0.0764985	-0.033562	0.0429365	0.0429365	0.189536	0.0585145	12.6558	41151156	2557595	0.810464	0.191891
2007	123	SC Firm 123	1	US	0	SERV	5000	CSERV	1	0.205055	0.0656917	0.0161093	0.00444308	0.169583	3.12147	15.8531	0.0729174	0.0176595	1.77857	0.03861	0.0605457	0.0991557	0.0991557	0.205055	0.0656917	13.9689	44813769	3150878	0.794945	0.225265
2008	123	SC Firm 123	1	US	0	SERV	5000	CSERV	1	0.240797	0.17341	0.0778948	0.0529183	0.183012	1.3886	15.9604	0.0768779	0.00454194	-0.291621	0.0387199	-0.138324	-0.0996042	-0.0996042	0.240797	0.17341	5.87546	17897069	3754616	0.759203	0.225018
2009	123	SC Firm 123	1	US	0	SERV	5000	CSERV	1	0.200536	0.107849	0	0	0.0674464	1.85942	15.982	0.0713986	0.0802232	-2.77553	-0.00342709	0.0266114	0.0231843	0.0231843	0.200536	0.107849	9.90326	30537210	3691529	0.799464	0.25101
2010	123	SC Firm 123	1	US	0	SERV	5000	CSERV	1	0.275231	0.143607	0.10113	0.0473292	0.128956	1.91655	16.0299	0.0692306	0.0501386	2.53192	0.107463	-0.0259099	0.0815534	0.0815534	0.275231	0.143607	11.713	36115269	6056126	0.724769	0.223023
2011	123	SC Firm 123	1	US	0	SERV	5000	CSERV	1	0.304441	0.175708	0.0990708	0.0508321	0.120719	1.73266	16.271	0.0727013	0.00564989	1.60145	0.0827688	-0.00637597	0.0763928	0.0763928	0.304441	0.175708	12.7652	39019151	8317388	0.695559	0.267227
2012	123	SC Firm 123	1	US	0	SERV	5000	CSERV	1	0.410989	0.187583	0.17146	0.0640902	0.111156	2.19097	16.4597	0.0671899	0.0053202	2.32108	0.186643	0.00608607	0.192729	0.192729	0.410989	0.187583	21.4638	65991024	15237000	0.589011	0.315315
2013	123	SC Firm 123	1	US	0	SERV	5000	CSERV	1	0.409757	0.193192	0.144105	0.0548868	0.114997	2.12098	16.591	0.0665253	0.00174234	2.21931	0.0424942	-0.00494119	0.037553	0.037553	0.409757	0.193192	23.0915	70995310	17000000	0.590243	0.33065
2014	123	SC Firm 123	1	US	0	SERV	5000	CSERV	1	0.543007	0.262957	0.269963	0.0999373	0.0878756	2.06501	15.9891	0.0575866	0.0186613	2.3882	0.166334	-0.0866126	0.0797217	0.0797217	0.543007	0.262957	23.6197	68690880	24507000	0.456993	0.389945
2004	124	SC Firm 124	1	US	1	MAN	1000	BMAT	1	0.56995	0.189695	0.305071	0.0719638	0.196326	3.00456	15.247	0.224621	0.00566727	3.78574	0.0565625	0.0211984	0.0777609	0.0777609	0.56995	0.189695	35.13	9047445	2118033	0.43005	0.38116
2005	124	SC Firm 124	1	US	1	MAN	1000	BMAT	1	0.54434	0.183143	0.301381	0.0748993	0.207719	2.97222	15.3273	0.228638	0.00695821	3.34522	-0.0135317	-0.0250022	-0.0385339	-0.0385339	0.54434	0.183143	36.27	9217763	2066658	0.45566	0.369042
2006	124	SC Firm 124	1	US	1	MAN	1000	BMAT	1	0.598877	0.188951	0.375531	0.0857876	0.197413	3.16948	15.4039	0.215318	0.00315968	2.66663	0.13124	-0.0500825	0.0811578	0.0811578	0.598877	0.188951	45.2	11360426	2646657	0.401123	0.378584
2007	124	SC Firm 124	1	US	1	MAN	1000	BMAT	1	0.571906	0.176065	0.331681	0.0735452	0.207441	3.24827	15.5147	0.229398	0.00524962	1.77857	0.0115065	-0.0139824	-0.00247586	-0.00247586	0.571906	0.176065	51.21	12639913	2701000	0.428094	0.377678
2008	124	SC Firm 124	1	US	1	MAN	1000	BMAT	1	0.654018	0.272597	0.408836	0.120573	0.225504	2.39921	15.6299	0.238643	0.00669326	-0.291621	0.0862116	-0.146019	-0.0598079	-0.0598079	0.654018	0.272597	35.15	8301711	3111100	0.345982	0.430343
2009	124	SC Firm 124	1	US	1	MAN	1000	BMAT	1	0.584218	0.217593	0.316639	0.0840057	0.21769	2.68492	15.5906	0.234261	0.00263309	-2.77553	-0.035412	0.0320062	-0.00340576	-0.00340576	0.584218	0.217593	44.58	10547394	2933300	0.415782	0.408831
2010	124	SC Firm 124	1	US	1	MAN	1000	BMAT	1	0.549587	0.185939	0.278149	0.0672772	0.238537	2.95575	15.6221	0.235684	0.0110064	2.53192	-0.0524609	-0.056258	-0.108719	-0.108719	0.549587	0.185939	50.42	11723293	2677700	0.450413	0.389434
2004	125	SC Firm 125	1	US	0	SERV	4000	HCARE	1	0.435517	0.164997	0.298369	0.0982158	0.180372	2.63955	13.7446	0.181271	0.00926544	3.78574	0.0164465	-0.00781882	0.00862766	0.00862766	0.435517	0.164997	10.315	2452422	484600	0.564483	0.19547
2005	125	SC Firm 125	1	US	0	SERV	4000	HCARE	1	0.438614	0.178751	0.314183	0.113179	0.188431	2.45377	13.8134	0.164267	0.00278916	3.34522	0.0443414	-0.0141567	0.0301847	0.0301847	0.438614	0.178751	10.4025	2476830	539100	0.561386	0.181434
2006	125	SC Firm 125	1	US	0	SERV	4000	HCARE	1	0.398941	0.154876	0.239419	0.0799632	0.184151	2.57588	13.8518	0.170837	0.00290709	2.66663	-0.0334456	-0.057026	-0.0904716	-0.0904716	0.398941	0.154876	11.76	2714208	497400	0.601059	0.209737
2007	125	SC Firm 125	1	US	0	SERV	4000	HCARE	1	0.38139	0.165115	0.202255	0.0752114	0.170247	2.30985	13.9027	0.169062	0.00637814	1.77857	0.0128908	-0.0215587	-0.00866795	-0.00866795	0.38139	0.165115	11.4975	2603034	514800	0.61861	0.224552
2008	125	SC Firm 125	1	US	0	SERV	4000	HCARE	1	0.372375	0.145111	0.166461	0.0540465	0.182902	2.56614	14.0288	0.164334	0.00932714	-0.291621	0.00471361	-0.0603485	-0.0556349	-0.0556349	0.372375	0.145111	13.7375	3071705	521400	0.627625	0.247036
2009	125	SC Firm 125	1	US	0	SERV	4000	HCARE	1	0.283256	0.0848872	0.0723442	0.0179759	0.183411	3.33685	14.0942	0.155989	0.00309132	-2.77553	-0.0394924	0.0309502	-0.00854225	-0.00854225	0.283256	0.0848872	21.7125	4933080	457600	0.716744	0.22736
2010	125	SC Firm 125	1	US	0	SERV	4000	HCARE	1	0.259733	0.0470499	0.030963	0.00447614	0.196922	5.52037	14.185	0.152671	0.0125557	2.53192	0.000792214	-0.0383092	-0.037517	-0.037517	0.259733	0.0470499	40.42	9296600	459000	0.740267	0.23608
2011	125	SC Firm 125	1	US	0	SERV	4000	HCARE	1	0.324464	0.0737818	0.101055	0.0183029	0.18152	4.39761	14.3335	0.153648	0.0089872	1.60145	0.0927039	-0.104519	-0.0118152	-0.0118152	0.324464	0.0737818	35.35	8066870	642600	0.675536	0.248523
2012	125	SC Firm 125	1	US	0	SERV	4000	HCARE	1	0.334099	0.0671757	0.113448	0.0180359	0.213279	4.9735	14.4572	0.16804	0.0261083	2.32108	0.0448346	-0.0683322	-0.0234976	-0.0234976	0.334099	0.0671757	45.085	10306431	742200	0.665901	0.248886
2013	125	SC Firm 125	1	US	0	SERV	4000	HCARE	1	0.43009	0.13953	0.277474	0.0762274	0.19783	3.08243	14.5312	0.155578	0.0102703	2.21931	0.156205	-0.11506	0.0411454	0.0411454	0.43009	0.13953	32.88	7187568	1165500	0.56991	0.211226
2014	125	SC Firm 125	1	US	0	SERV	4000	HCARE	1	0.378203	0.0884797	0.214411	0.0417386	0.157904	4.27446	14.6583	0.12567	0.0255571	2.3882	0.0474988	-0.0465624	0.000936356	0.000936356	0.378203	0.0884797	63.69	13731564	1332900	0.621797	0.208495
2004	126	SC Firm 126	1	US	1	MAN	3000	CGOODS	1	0.191991	0.049605	0	0	0.173684	3.87039	14.9562	0.080778	0.0496268	3.78574	0.0217391	0.0702517	0.0919908	0.0919908	0.191991	0.049605	52.31	16074623	839000	0.808009	0.199542
2005	126	SC Firm 126	1	US	1	MAN	3000	CGOODS	1	0.21637	0.0538035	0	0	0.103511	4.02149	14.8977	0.0893753	0.0527999	3.34522	0.0250798	-0.0752394	-0.0501596	-0.0501596	0.21637	0.0538035	50.36	16689272	949000	0.78363	0.222982
2006	126	SC Firm 126	1	US	1	MAN	3000	CGOODS	1	0.214924	0.0659516	0	0	0.043529	3.25882	14.944	0.0940536	0.0500453	2.66663	0.0305091	0.101244	0.131753	0.131753	0.214924	0.0659516	58.41	15663874	1106000	0.785076	0.216479
2007	126	SC Firm 126	1	US	1	MAN	3000	CGOODS	1	0.28305	0.0975894	0	0	-0.00990262	2.90042	15.1143	0.0653573	0.0365414	1.77857	0.100512	0.121967	0.222479	0.222479	0.28305	0.0975894	16.04	15858636	1715000	0.71695	0.283875
2008	126	SC Firm 126	1	US	1	MAN	3000	CGOODS	1	0.321077	0.203675	0	0	-0.0273621	1.57642	15.2534	0.0756734	0.0192073	-0.291621	-0.0455323	-0.0171013	-0.0626336	-0.0626336	0.321077	0.203675	17.75	5872496	1502000	0.678923	0.330056
2009	126	SC Firm 126	1	US	1	MAN	3000	CGOODS	1	0.412183	0.237443	0	0	-0.0340192	1.73592	15.1113	0.115583	0.0353353	-2.77553	0.0888937	0.0499354	0.138829	0.138829	0.412183	0.237443	16.38	6150093	1915000	0.587817	0.412613
2004	127	SC Firm 127	1	US	0	SERV	4000	HCARE	1	0.535919	0.171815	0.360747	0.0920492	0.167073	3.11917	16.4444	0.303651	0.0101326	3.78574	0.0719548	0.0456509	0.117606	0.117606	0.535919	0.171815	56.75	64237716	13326700	0.464081	0.298975
2005	127	SC Firm 127	1	US	0	SERV	4000	HCARE	1	0.532684	0.169943	0.361308	0.092235	0.172134	3.13449	16.4996	0.321898	0.000920786	3.34522	-0.00947487	-0.0144788	-0.0239537	-0.0239537	0.532684	0.169943	56.59	63954455	13093800	0.467316	0.296601
2006	127	SC Firm 127	1	US	0	SERV	4000	HCARE	1	0.506297	0.159156	0.254436	0.0592561	0.215966	3.18114	16.5686	0.369846	0.0273824	2.66663	-0.0877309	-0.0609552	-0.148686	-0.148686	0.506297	0.159156	52.1	58959937	11160000	0.493703	0.340634
2007	127	SC Firm 127	1	US	0	SERV	4000	HCARE	1	0.486828	0.177656	0.26636	0.0763663	0.210532	2.74028	16.7405	0.319076	0.00597052	1.77857	0.0715689	0.0695261	0.141095	0.141095	0.486828	0.177656	53.39	60560995	13083400	0.513172	0.31121
2008	127	SC Firm 127	1	US	0	SERV	4000	HCARE	1	0.766881	0.328717	0.60572	0.18612	0.220898	2.33296	16.8297	0.295294	0.00743601	-0.291621	0.319013	-0.0968623	0.222151	0.222151	0.766881	0.328717	40.27	45749121	22402600	0.233119	0.411305
2009	127	SC Firm 127	1	US	0	SERV	4000	HCARE	1	0.653191	0.304179	0.411602	0.139684	0.271677	2.14739	16.8991	0.298512	0.030219	-2.77553	-0.162609	0.0195988	-0.143011	-0.143011	0.653191	0.304179	35.71	41031996	17937200	0.346809	0.410587
2010	127	SC Firm 127	1	US	0	SERV	4000	HCARE	1	0.599363	0.315162	0.358018	0.146429	0.255053	1.90176	16.9543	0.25614	0.00955865	2.53192	0.02077	-0.000180637	0.0205894	0.0205894	0.599363	0.315162	35.04	40376242	18581100	0.400637	0.375938
2011	127	SC Firm 127	1	US	0	SERV	4000	HCARE	1	0.597689	0.294832	0.340353	0.126795	0.223391	2.02722	17.0054	0.230551	0.0217432	1.60145	0.0456628	-0.0310103	0.0146525	0.0146525	0.597689	0.294832	41.56	48117794	20118100	0.402311	0.390112
2012	127	SC Firm 127	1	US	0	SERV	4000	HCARE	1	0.570765	0.258208	0.272525	0.089307	0.184084	2.21048	16.9336	0.225594	0.0296281	2.32108	-0.0140818	0.00096224	-0.0131196	-0.0131196	0.570765	0.258208	49.32	56404473	19633700	0.429235	0.409967
2013	127	SC Firm 127	1	US	0	SERV	4000	HCARE	1	0.4998	0.23624	0.228193	0.0838499	0.195125	2.11565	16.9559	0.226264	0.00820275	2.21931	-0.0572049	0.0556616	-0.00154332	-0.00154332	0.4998	0.23624	51	56956545	17617300	0.5002	0.351911
2014	127	SC Firm 127	1	US	0	SERV	4000	HCARE	1	0.586111	0.221258	0.342877	0.0947679	0.126744	2.64899	16.7918	0.21441	0.0479284	2.3882	0.111805	-0.0470744	0.0647304	0.0647304	0.586111	0.221258	68.99	76622157	21770100	0.413889	0.37015
2004	128	SC Firm 128	1	US	1	MAN	9000	TECH	1	0.243665	0.0950918	0.0109076	0.0035842	0.103933	2.56242	15.9232	0.101914	0.0269817	3.78574	0.0356535	-0.00590181	0.0297517	0.0297517	0.243665	0.0950918	14.87	35761889	3758019	0.756335	0.244505
2005	128	SC Firm 128	1	US	1	MAN	9000	TECH	1	0.270974	0.122894	0.0102658	0.00389468	0.124923	2.20494	16.0839	0.104467	0.01619	3.34522	0.0471545	-0.0331994	0.0139551	0.0139551	0.270974	0.122894	13.62	32472082	4549761	0.729026	0.273847
2006	128	SC Firm 128	1	US	1	MAN	9000	TECH	1	0.443845	0.227291	0.250441	0.109646	0.108484	1.95276	16.2274	0.109638	0.0130864	2.66663	0.19879	-0.16926	0.0295301	0.0295301	0.443845	0.227291	13.2	28014875	8240540	0.556155	0.258024
2007	128	SC Firm 128	1	US	1	MAN	9000	TECH	1	0.425188	0.195652	0.212184	0.0813612	0.112491	2.17319	16.398	0.0969006	0.00267944	1.77857	0.0554023	0.03642	0.0918224	0.0918224	0.425188	0.195652	18.53	38953525	9475162	0.574812	0.283304
2008	128	SC Firm 128	1	US	1	MAN	9000	TECH	1	0.425404	0.325192	0.179049	0.124315	0.114827	1.30816	16.5153	0.0931119	0.000179613	-0.291621	0.0285317	-0.0122383	0.0162934	0.0162934	0.425404	0.325192	10.47	21075461	10156345	0.574596	0.316411
2009	128	SC Firm 128	1	US	1	MAN	9000	TECH	1	0.39362	0.227403	0.160151	0.0795835	0.0870898	1.73094	16.4564	0.0829608	0.016124	-2.77553	0.0148216	0.0541531	0.0689747	0.0689747	0.39362	0.227403	17.47	35856144	10553743	0.60638	0.30441
2010	128	SC Firm 128	1	US	1	MAN	9000	TECH	1	0.41229	0.211525	0.159937	0.0678656	0.127629	1.94913	16.6496	0.0820033	0.0233382	2.53192	0.0700054	-0.00120685	0.0687986	0.0687986	0.41229	0.211525	22.9	47385733	12712240	0.58771	0.323652
2011	128	SC Firm 128	1	US	1	MAN	9000	TECH	1	0.426634	0.249933	0.147677	0.0720035	0.143936	1.70699	16.8116	0.0821935	0.00914393	1.60145	0.0578344	-0.0237563	0.0340781	0.0340781	0.426634	0.249933	21.54	44133091	14705748	0.573366	0.3404
2012	128	SC Firm 128	1	US	1	MAN	9000	TECH	1	0.398741	0.221162	0.0696964	0.0310818	0.147574	1.80294	16.8935	0.082846	0.00327848	2.32108	0.0113601	0.00866925	0.0200293	0.0200293	0.398741	0.221162	25.3	53306063	15137000	0.601259	0.366024
2013	128	SC Firm 128	1	US	1	MAN	9000	TECH	1	0.504417	0.312823	0.239584	0.123512	0.131715	1.61247	16.9606	0.0758577	0.00843575	2.21931	0.174268	-0.0515606	0.122707	0.122707	0.504417	0.312823	25.15	50803000	23127000	0.495583	0.357456
2014	128	SC Firm 128	1	US	1	MAN	9000	TECH	1	0.516562	0.286366	0.197873	0.0847869	0.133889	1.80385	17.0117	0.0821213	0.00152579	2.3882	0.012255	-0.036634	-0.0243791	-0.0243791	0.516562	0.286366	29.74	59033900	23689000	0.483438	0.40328
2004	129	SC Firm 129	1	US	1	MAN	2000	IND	1	0.525335	0.248745	0.342087	0.134616	0.166493	2.11194	16.5637	0.179512	0.00914166	3.78574	0.022248	0.0135077	0.0357558	0.0357558	0.525335	0.248745	35.05	25958433	8595000	0.474665	0.3108
2005	129	SC Firm 129	1	US	1	MAN	2000	IND	1	0.537528	0.239	0.33966	0.122027	0.174377	2.24907	16.6665	0.174319	0.0065797	3.34522	0.0386022	-0.0305915	0.00801068	0.00801068	0.537528	0.239	37.35	29484782	9260000	0.462472	0.332559
2006	129	SC Firm 129	1	US	1	MAN	2000	IND	1	0.524529	0.224969	0.311996	0.106602	0.187393	2.33156	16.7979	0.172451	0.00928438	2.66663	0.028599	-0.0109254	0.0176735	0.0176735	0.524529	0.224969	44.09	33740811	9794000	0.475471	0.347686
2007	129	SC Firm 129	1	US	1	MAN	2000	IND	1	0.527896	0.198455	0.288972	0.0825599	0.202134	2.66003	16.9125	0.174339	0.00984045	1.77857	0.0302337	-0.0411077	-0.010874	-0.010874	0.527896	0.198455	56.66	41960462	10389000	0.472104	0.362398
2008	129	SC Firm 129	1	US	1	MAN	2000	IND	1	0.54154	0.265893	0.318978	0.125584	0.216968	2.03669	16.9831	0.166683	0.0102984	-0.291621	0.0477662	-0.0528042	-0.00503802	-0.00503802	0.54154	0.265893	36.61	31457902	11394000	0.45846	0.352139
2009	129	SC Firm 129	1	US	1	MAN	2000	IND	1	0.546577	0.263868	0.337988	0.131806	0.184284	2.0714	16.8163	0.177099	0.0253619	-2.77553	-0.029955	-0.0706876	-0.100643	-0.100643	0.546577	0.263868	42.6	30135064	10802000	0.453423	0.335627
2010	129	SC Firm 129	1	US	1	MAN	2000	IND	1	0.537977	0.236665	0.324328	0.113326	0.178523	2.27316	16.8619	0.143895	0.00332127	2.53192	0.0650965	0.0191744	0.0842709	0.0842709	0.537977	0.236665	57.17	39636698	12289000	0.462023	0.34956
2011	129	SC Firm 129	1	US	1	MAN	2000	IND	1	0.532165	0.293792	0.317832	0.145588	0.201039	1.81137	17.0028	0.144043	0.0154878	1.60145	0.0171409	-0.0348686	-0.0177277	-0.0177277	0.532165	0.293792	46.59	30523041	12698000	0.467835	0.346213
2012	129	SC Firm 129	1	US	1	MAN	2000	IND	1	0.542909	0.270049	0.327132	0.131516	0.202494	2.01041	17.0106	0.147326	0.00228841	2.32108	0.00978252	-0.04505	-0.0352674	-0.0352674	0.542909	0.270049	52.96	34952949	12931000	0.457091	0.345537
2013	129	SC Firm 129	1	US	1	MAN	2000	IND	1	0.538343	0.225383	0.330909	0.109846	0.195783	2.38857	17.0211	0.145886	0.00374773	2.21931	0.015054	-0.0122213	0.00283275	0.00283275	0.538343	0.225383	70.18	45720919	13303000	0.461657	0.343329
2014	129	SC Firm 129	1	US	1	MAN	2000	IND	1	0.557803	0.236267	0.360395	0.121409	0.204161	2.3609	17.0157	0.157257	0.00505535	2.3882	0.00756918	-0.0684121	-0.0608429	-0.0608429	0.557803	0.236267	61.73	43593555	13486000	0.442197	0.332299
2006	130	SC Firm 130	1	US	1	MAN	1	OILGAS	1	0.487828	0.295037	0.337589	0.182963	0.218333	1.65345	14.1477	0.568555	0.0337013	2.66663	-0.0682424	0.0601684	-0.00807399	-0.00807399	0.487828	0.295037	46.94	3306731	1383912	0.512172	0.31525
2007	130	SC Firm 130	1	US	1	MAN	1	OILGAS	1	0.474823	0.243276	0.303979	0.13442	0.221911	1.95179	14.1767	0.609778	0.000892514	1.77857	0.0254499	-0.0358959	-0.010446	-0.010446	0.474823	0.243276	64.23	4548541	1462289	0.525177	0.322968
2008	130	SC Firm 130	1	US	1	MAN	1	OILGAS	1	0.365539	0.396745	0.20657	0.229106	0.198782	0.921343	14.2659	0.577761	0.0145903	-0.291621	-0.0217812	0.130272	0.108491	0.108491	0.365539	0.396745	29.33	2098386	1380056	0.634461	0.32804
2009	130	SC Firm 130	1	US	1	MAN	1	OILGAS	1	0.3443	0.280929	0.183594	0.143336	0.176297	1.22558	14.1804	0.637048	0.0243196	-2.77553	-0.0185745	-0.0321915	-0.050766	-0.050766	0.3443	0.280929	46.8	3351605	1309415	0.6557	0.329753
2010	130	SC Firm 130	1	US	1	MAN	1	OILGAS	1	0.365397	0.315252	0.205274	0.171176	0.169871	1.15906	14.272	0.672984	0.001001	2.53192	0.0653178	0.00504038	0.0703581	0.0703581	0.365397	0.315252	48.26	3463211	1594433	0.634603	0.342441
2011	130	SC Firm 130	1	US	1	MAN	1	OILGAS	1	0.381701	0.357135	0.265359	0.24531	0.129395	1.06878	14.1326	0.726952	0.0267973	1.60145	0.0772696	0.0474396	0.124709	0.124709	0.381701	0.357135	50	3598543	1999126	0.618299	0.312282
2004	131	SC Firm 131	1	US	1	MAN	1	OILGAS	1	0.336467	0.186931	0.218789	0.112671	0.2699	1.79996	14.6358	0.87975	0.0122439	3.78574	0.0335647	0.0464979	0.0800626	0.0800626	0.336467	0.186931	17.84	8486662	1951145	0.663533	0.306243
2005	131	SC Firm 131	1	US	1	MAN	1	OILGAS	1	0.29851	0.115287	0.153343	0.052548	0.352987	2.58927	15.1056	0.785106	0.0605886	3.34522	0.0468567	0.0486842	0.0955409	0.0955409	0.29851	0.115287	36.685	17760980	2314440	0.70149	0.316247
2006	131	SC Firm 131	1	US	1	MAN	1	OILGAS	1	0.243493	0.130741	0.0934769	0.0459703	0.300878	1.8624	15.1838	0.844917	0.0386289	2.66663	-0.00266737	0.047156	0.0444886	0.0444886	0.243493	0.130741	31.225	15221253	2289361	0.756507	0.326419
2007	131	SC Firm 131	1	US	1	MAN	1	OILGAS	1	0.250437	0.120956	0.11565	0.0511055	0.233092	2.07048	15.2496	0.862713	0.0488069	1.77857	0.0610597	0.0779984	0.139058	0.139058	0.250437	0.120956	44.625	22002328	3027506	0.749563	0.323752
2008	131	SC Firm 131	1	US	1	MAN	1	OILGAS	1	0.258488	0.198769	0.138215	0.102444	0.323702	1.30044	15.7619	0.856191	0.0675775	-0.291621	0.0686907	0.0286621	0.0973528	0.0973528	0.258488	0.198769	33.29	16620476	4123207	0.741512	0.315946
2009	131	SC Firm 131	1	US	1	MAN	1	OILGAS	1	0.26151	0.161673	0.172895	0.102207	0.107864	1.61752	15.2628	0.885766	0.129833	-2.77553	0.0339432	0.0635716	0.0975147	0.0975147	0.26151	0.161673	48.65	24569092	4738212	0.73849	0.29382
2010	131	SC Firm 131	1	US	1	MAN	1	OILGAS	1	0.36491	0.253595	0.275541	0.183607	0.137338	1.43895	15.5864	0.863887	0.0178001	2.53192	0.145794	0.0161602	0.161954	0.161954	0.36491	0.253595	45.705	23225209	7890895	0.63509	0.285294
2011	131	SC Firm 131	1	US	1	MAN	1	OILGAS	1	0.33539	0.239169	0.232797	0.158969	0.208201	1.40231	16.0807	0.85708	0.0419725	1.60145	0.0177053	0.0747065	0.0924118	0.0924118	0.33539	0.239169	49.255	26501106	8330674	0.66461	0.289415
2012	131	SC Firm 131	1	US	1	MAN	1	OILGAS	1	0.355729	0.228622	0.263839	0.161343	0.161965	1.55597	16.257	0.853716	0.0430478	2.32108	0.0509846	0.0262561	0.0772406	0.0772406	0.355729	0.228622	60.395	32810457	9724418	0.644271	0.283124
2013	131	SC Firm 131	1	US	1	MAN	1	OILGAS	1	0.315083	0.173675	0.220199	0.11427	0.216017	1.81421	16.475	0.855257	0.0369286	2.21931	-0.00297613	0.0436971	0.040721	0.040721	0.315083	0.173675	83.92	45834722	9633425	0.684917	0.302299
2014	131	SC Firm 131	1	US	1	MAN	1	OILGAS	1	0.294199	0.168463	0.194115	0.104802	0.272558	1.74637	16.6793	0.839194	0.0419584	2.3882	0.0170796	0.0287634	0.0458431	0.0458431	0.294199	0.168463	92.07	50481507	10227159	0.705801	0.320463
2004	132	SC Firm 132	1	US	1	MAN	1	OILGAS	1	0.569762	0.330345	0.400667	0.199377	0.115988	1.72475	13.8597	0.00747944	0.00453394	3.78574	0.0948862	-0.0738285	0.0210576	0.0210576	0.569762	0.330345	30.33	3702140	1826285	0.430238	0.439497
2005	132	SC Firm 132	1	US	1	MAN	1	OILGAS	1	0.886751	0.402516	0.749383	0.204623	0.133195	2.20302	14.0416	0.00747944	0.0104862	3.34522	0.340333	-0.208	0.132333	0.132333	0.886751	0.402516	36.69	4399351	2963775	0.113249	0.555314
2006	132	SC Firm 132	1	US	1	MAN	1	OILGAS	1	0.608717	0.282402	0.411898	0.150508	0.143114	2.1555	14.0529	0.00747944	0.00523155	2.66663	-0.250069	0.2408	-0.00926917	-0.00926917	0.608717	0.282402	41.75	5076925	1997963	0.391283	0.437649
2007	132	SC Firm 132	1	US	1	MAN	1	OILGAS	1	0.61952	0.272595	0.451459	0.159255	0.107056	2.27267	14.124	0.741558	0.0236488	1.77857	0.112033	0.0171093	0.129142	0.129142	0.61952	0.272595	53.28	6508418	2439034	0.38048	0.408098
2008	132	SC Firm 132	1	US	1	MAN	1	OILGAS	1	0.468707	0.362635	0.357186	0.26382	0.112882	1.2925	14.2707	0.768814	0.00568901	-0.291621	0.0110729	0.22318	0.234253	0.234253	0.468707	0.362635	33.55	4390554	2498049	0.531293	0.320124
2004	133	SC Firm 133	1	US	1	MAN	3000	CGOODS	1	0.53251	0.15104	0.23594	0.0460114	0.223295	3.52562	15.5632	0.174483	0.012774	3.78574	0.0130255	0.00978938	0.0228149	0.0228149	0.53251	0.15104	22.885	11098769	1974600	0.46749	0.38815
2005	133	SC Firm 133	1	US	1	MAN	3000	CGOODS	1	0.564363	0.202802	0.296864	0.0765596	0.236168	2.78283	15.6529	0.17865	0.0085169	3.34522	0.0562046	-0.0917958	-0.0355911	-0.0355911	0.564363	0.202802	16.74	8620507	2193000	0.435637	0.380436
2006	133	SC Firm 133	1	US	1	MAN	3000	CGOODS	1	0.571285	0.208857	0.24326	0.0598717	0.239714	2.73529	15.6817	0.200312	0.000732869	2.66663	-0.00824503	-0.0605692	-0.0688142	-0.0688142	0.571285	0.208857	20.41	8188799	2161800	0.428715	0.433472
2007	133	SC Firm 133	1	US	1	MAN	3000	CGOODS	1	0.709383	0.248645	0.475847	0.109591	0.234263	2.85299	15.7668	0.213491	0.00237323	1.77857	0.185399	-0.192186	-0.00678673	-0.00678673	0.709383	0.248645	21.805	8843876	2926700	0.290617	0.445549
2008	133	SC Firm 133	1	US	1	MAN	3000	CGOODS	1	0.670099	0.270557	0.41995	0.116767	0.21412	2.47674	15.8837	0.208154	0.0141909	-0.291621	0.0860672	0.020075	0.106142	0.106142	0.670099	0.270557	15.48	9053435	3358000	0.329901	0.431254
2009	133	SC Firm 133	1	US	1	MAN	3000	CGOODS	1	0.68319	0.354988	0.464297	0.18113	0.156473	1.92454	15.8066	0.198335	0.040164	-2.77553	0.0345014	-0.0237801	0.0107213	0.0107213	0.68319	0.354988	24.18	6425997	3536600	0.31681	0.408608
2010	133	SC Firm 133	1	US	1	MAN	3000	CGOODS	1	0.63483	0.235119	0.386678	0.100298	0.221887	2.70004	15.8691	0.191843	0.0460597	2.53192	-0.0280006	-0.0113577	-0.0393583	-0.0393583	0.63483	0.235119	40.35	11019140	3387200	0.36517	0.404603
2011	133	SC Firm 133	1	US	1	MAN	3000	CGOODS	1	0.580899	0.149386	0.316595	0.0554434	0.236679	3.88858	15.9914	0.182199	0.0114379	1.60145	0.0410112	0.020928	0.0619391	0.0619391	0.580899	0.149386	56.16	20752038	3644500	0.419101	0.386745
2012	133	SC Firm 133	1	US	1	MAN	3000	CGOODS	1	0.585439	0.154969	0.320319	0.0576712	0.257455	3.77778	16.089	0.186835	0.0160273	2.32108	0.0326558	-0.0830275	-0.0503716	-0.0503716	0.585439	0.154969	59.86	21047135	3859800	0.414561	0.390065
2013	133	SC Firm 133	1	US	1	MAN	3000	CGOODS	1	0.539985	0.131339	0.29027	0.0500434	0.266151	4.11139	16.1362	0.189036	0.00453516	2.21931	-0.000209931	-0.00636791	-0.00657784	-0.00657784	0.539985	0.131339	75.32	25518383	3858300	0.460015	0.351845
2014	133	SC Firm 133	1	US	1	MAN	3000	CGOODS	1	0.510103	0.123707	0.258388	0.0451066	0.281784	4.12349	16.2106	0.190957	0.00983795	2.3882	0.0197743	-0.042408	-0.0226337	-0.0226337	0.510103	0.123707	76.2	28433004	4013900	0.489897	0.339416
2005	134	SC Firm 134	1	US	0	SERV	5000	CSERV	1	0.213262	0.165719	0.0364346	0.0269613	0.0739425	1.28689	14.5667	0.0117294	0.0183655	3.34522	0.0777872	-0.208	-0.130213	-0.130213	0.213262	0.165719	22.5333	8328004	1654249	0.786738	0.231069
2006	134	SC Firm 134	1	US	0	SERV	5000	CSERV	1	0.24177	0.223173	0.0738961	0.0670701	0.0675039	1.08333	14.6209	0.0165947	0.00211307	2.66663	0.0416019	-0.0114827	0.0301191	0.0301191	0.24177	0.223173	19.7308	6954892	1998060	0.75823	0.225067
2007	134	SC Firm 134	1	US	0	SERV	5000	CSERV	1	0.376855	0.257495	0.173482	0.107431	0.080305	1.46354	14.7958	0.0216372	0.0110166	1.77857	0.135992	-0.166034	-0.0300416	-0.0300416	0.376855	0.257495	29.7372	9014517	3126173	0.623145	0.288393
2008	134	SC Firm 134	1	US	0	SERV	5000	CSERV	1	0.574739	0.58892	0.381262	0.395104	0.121013	0.975921	14.8929	0.0420671	0.0229279	-0.291621	0.0443621	-0.0245818	0.0197803	0.0197803	0.574739	0.58892	7.74936	2364666	3387654	0.425261	0.344853
2009	134	SC Firm 134	1	US	0	SERV	5000	CSERV	1	0.510432	0.289169	0.235442	0.107264	0.103962	1.76517	14.8246	0.0398878	0.00848754	-2.77553	-0.060153	0.0169305	-0.0432225	-0.0432225	0.510432	0.289169	24.1979	7449581	3030516	0.489568	0.397394
2010	134	SC Firm 134	1	US	0	SERV	5000	CSERV	1	0.558852	0.351179	0.298435	0.153797	0.0978717	1.59136	14.9253	0.0370016	0.00393396	2.53192	0.103609	-0.0588041	0.0448054	0.0448054	0.558852	0.351179	23.596	6873330	3720236	0.441148	0.410874
2011	134	SC Firm 134	1	US	0	SERV	5000	CSERV	1	0.618797	0.509423	0.335008	0.243724	0.100749	1.2147	15.0536	0.0492343	0.00120531	1.60145	0.0469153	-0.142831	-0.0959159	-0.0959159	0.618797	0.509423	29.02	3876519	4025432	0.381203	0.469791
2012	134	SC Firm 134	1	US	0	SERV	5000	CSERV	1	0.632146	0.279502	0.322565	0.0970558	0.104406	2.26169	15.2094	0.0573935	0.000179613	2.32108	0.0677862	-0.0190929	0.0486933	0.0486933	0.632146	0.279502	61.44	11623096	4508934	0.367854	0.505155
2013	134	SC Firm 134	1	US	0	SERV	5000	CSERV	1	0.666774	0.363558	0.326353	0.121499	0.102581	1.83403	15.3781	0.0621104	0.00776375	2.21931	0.0841854	-0.0358766	0.0483088	0.0483088	0.666774	0.363558	69.66	9033927	5160485	0.333226	0.561356
2014	134	SC Firm 134	1	US	0	SERV	5000	CSERV	1	0.751985	0.384765	0.438449	0.138708	0.103139	1.9544	15.5671	0.0613185	0.000784594	2.3882	0.179904	-0.0610816	0.118822	0.118822	0.751985	0.384765	85.36	10846439	6783313	0.248015	0.608554
2004	135	SC Firm 135	1	US	1	MAN	2000	IND	1	0.389859	0.0819263	0.00269618	0.000377421	0.174573	4.75865	15.0147	0.21068	0.0168861	3.78574	0.104233	0.0330178	0.137251	0.137251	0.389859	0.0819263	27.94	5959264	531788	0.610141	0.406435
2005	135	SC Firm 135	1	US	1	MAN	2000	IND	1	0.399979	0.0800607	0	0	0.192805	4.99594	15.1769	0.21314	0.0127876	3.34522	0.0604044	0.0711251	0.13153	0.13153	0.399979	0.0800607	33.755	7197479	626384	0.600021	0.408457
2006	135	SC Firm 135	1	US	1	MAN	2000	IND	1	0.398071	0.0775421	0	0	0.225295	5.13361	15.3489	0.246522	0.0231662	2.66663	0.0543456	-0.0169101	0.0374354	0.0374354	0.398071	0.0775421	40.5	8629759	725420	0.601929	0.412792
2007	135	SC Firm 135	1	US	1	MAN	2000	IND	1	0.380346	0.0763769	0	0	0.224346	4.97986	15.4709	0.240636	0.000855436	1.77857	0.0297434	-0.0117058	0.0180376	0.0180376	0.380346	0.0763769	44.68	9516696	786961	0.619654	0.407186
2008	135	SC Firm 135	1	US	1	MAN	2000	IND	1	0.327415	0.0888668	0	0	0.245024	3.68434	15.5443	0.23473	0.0145518	-0.291621	-0.0471783	-0.0466499	-0.0938282	-0.0938282	0.327415	0.0888668	33.27	7052354	687847	0.672585	0.349585
2009	135	SC Firm 135	1	US	1	MAN	2000	IND	1	0.308439	0.0886066	0	0	0.183566	3.48099	15.2246	0.213322	0.0420941	-2.77553	0.0124279	0.0147789	0.0272068	0.0272068	0.308439	0.0886066	34.77	7372126	716726	0.691561	0.331673
2010	135	SC Firm 135	1	US	1	MAN	2000	IND	1	0.324437	0.069834	0	0	0.218553	4.64584	15.6019	0.18612	0.0272731	2.53192	0.0569204	0.00661621	0.0635366	0.0635366	0.324437	0.069834	54.6	11577808	869226	0.675563	0.350209
2011	135	SC Firm 135	1	US	1	MAN	2000	IND	1	0.279953	0.0846042	0	0	0.228512	3.30897	15.6338	0.187945	0.00808261	1.60145	-0.0232487	-0.00686299	-0.0301117	-0.0301117	0.279953	0.0846042	40.96	8683670	802576	0.720047	0.301096
2012	135	SC Firm 135	1	US	1	MAN	2000	IND	1	0.286863	0.0940518	0	0	0.1932	3.05005	15.606	0.18828	0.0254581	2.32108	0.0151832	0.00509423	0.0202774	0.0202774	0.286863	0.0940518	39.55	8162804	847429	0.713137	0.313604
2013	135	SC Firm 135	1	US	1	MAN	2000	IND	1	0.289155	0.0886398	0	0	0.199065	3.26214	15.6206	0.186766	0.0024324	2.21931	0.00806651	-0.0107436	-0.00267712	-0.00267712	0.289155	0.0886398	44.25	8962980	871748	0.710845	0.308487
2014	135	SC Firm 135	1	US	1	MAN	2000	IND	1	0.34141	0.103493	0	0	0.222747	3.29888	15.6972	0.186244	0.0159636	2.3882	0.0398612	-0.019012	0.0208492	0.0208492	0.34141	0.103493	44.61	8549760	986983	0.65859	0.353694
2004	136	SC Firm 136	1	US	0	SERV	4000	HCARE	1	0.667698	0.298625	0.266257	0.0714023	0.156413	2.23591	16.8383	0.0503227	0.0036777	3.78574	0.0523851	-0.0766332	-0.024248	-0.024248	0.667698	0.298625	9.555	5645706	2403772	0.332302	0.547114
2005	136	SC Firm 136	1	US	0	SERV	4000	HCARE	1	0.733358	0.247723	0.50768	0.109897	0.132265	2.96039	16.901	0.0366433	0.0141571	3.34522	0.295791	-0.023966	0.271825	0.271825	0.733358	0.247723	20.95	12234213	4028700	0.266642	0.458396
2006	136	SC Firm 136	1	US	0	SERV	4000	HCARE	1	0.779781	0.290835	0.563213	0.129938	0.182632	2.68118	16.8865	0.038762	0.0316394	2.66663	-0.00890742	-0.159413	-0.168321	-0.168321	0.779781	0.290835	17.9	9712540	3983200	0.220219	0.49582
2007	136	SC Firm 136	1	US	0	SERV	4000	HCARE	1	0.867514	0.198407	0.743669	0.0988286	0.226581	4.3724	16.8985	0.0409976	0.0321006	1.77857	0.109733	-0.189502	-0.0797694	-0.0797694	0.867514	0.198407	36.5	18423083	4560000	0.132486	0.483144
2008	136	SC Firm 136	1	US	0	SERV	4000	HCARE	1	0.804291	0.245529	0.620151	0.114483	0.24882	3.27575	16.9039	0.0403325	0.0171418	-0.291621	-0.0234154	-0.0715712	-0.0949866	-0.0949866	0.804291	0.245529	27.49	13615742	4431000	0.195709	0.484771
2009	136	SC Firm 136	1	US	0	SERV	4000	HCARE	1	0.70231	0.260671	0.519013	0.138869	0.147772	2.69424	17.0232	0.0290918	0.0695559	-2.77553	0.330931	0.137958	0.468888	0.468888	0.70231	0.260671	43.21	23766105	8379400	0.29769	0.381085
2010	136	SC Firm 136	1	US	0	SERV	4000	HCARE	1	0.658395	0.195845	0.408793	0.080352	0.231601	3.36181	17.6216	0.0353009	0.0529085	2.53192	-0.135274	-0.106689	-0.241963	-0.241963	0.658395	0.195845	54.05	28542129	6951200	0.341605	0.42219
2011	136	SC Firm 136	1	US	0	SERV	4000	HCARE	1	0.806484	0.367575	0.727824	0.271634	0.171814	2.19406	17.6469	0.0266675	0.0405782	1.60145	0.361094	-0.119318	0.241776	0.241776	0.806484	0.367575	44.69	21655970	12586800	0.193516	0.324021
2004	137	SC Firm 137	1	US	1	MAN	1	OILGAS	1	0.370836	0.180784	0.0632373	0.0246516	0.233739	2.05127	18.3899	0.556393	0.0358466	3.78574	0.0418067	-0.0287776	0.013029	0.013029	0.370836	0.180784	51.26	328115260	72408000	0.629164	0.436386
2005	137	SC Firm 137	1	US	1	MAN	1	OILGAS	1	0.366098	0.181269	0.0570562	0.0226707	0.284422	2.01964	18.3899	0.513644	0.0364089	3.34522	0.0185423	-0.0946984	-0.0761562	-0.0761562	0.366098	0.181269	56.17	344490610	76271000	0.633902	0.427955
2006	137	SC Firm 137	1	US	1	MAN	1	OILGAS	1	0.384996	0.161121	0.0583535	0.0186583	0.312102	2.38949	18.3899	0.519083	0.017515	2.66663	0.0367509	-0.133511	-0.0967605	-0.0967605	0.384996	0.161121	76.63	439013270	84320000	0.615004	0.442088
2007	137	SC Firm 137	1	US	1	MAN	1	OILGAS	1	0.40243	0.16192	0.0620255	0.0186179	0.288766	2.48536	18.3899	0.499289	0.0154252	1.77857	0.054118	-0.0964343	-0.0423162	-0.0423162	0.40243	0.16192	93.69	504239580	97421000	0.59757	0.457506
2008	137	SC Firm 137	1	US	1	MAN	1	OILGAS	1	0.418155	0.193589	0.0663191	0.0231767	0.344961	2.16001	18.3899	0.532098	0.0371346	-0.291621	-0.00903303	-0.208	-0.217033	-0.217033	0.418155	0.193589	79.83	397234080	95361000	0.581845	0.463324
2009	137	SC Firm 137	1	US	1	MAN	1	OILGAS	1	0.426902	0.236067	0.0670169	0.028936	0.164133	1.80839	18.3899	0.596238	0.125597	-2.77553	0.0181937	-0.0438491	-0.0256554	-0.0256554	0.426902	0.236067	68.19	322334130	99606000	0.573098	0.484946
2010	137	SC Firm 137	1	US	1	MAN	1	OILGAS	1	0.398403	0.248709	0.076212	0.0396066	0.181422	1.60188	18.3899	0.659641	0.0138398	2.53192	0.0691382	0.0869723	0.156111	0.156111	0.398403	0.248709	73.12	364064480	120521000	0.601597	0.464966
2011	137	SC Firm 137	1	US	1	MAN	1	OILGAS	1	0.423009	0.258711	0.0818709	0.0407209	0.210502	1.63507	18.3899	0.64843	0.021779	1.60145	0.0589545	-0.0695208	-0.0105663	-0.0105663	0.423009	0.258711	84.76	401253840	140038000	0.576991	0.482169
2012	137	SC Firm 137	1	US	1	MAN	1	OILGAS	1	0.390545	0.250691	0.0538616	0.0288638	0.197034	1.55787	18.3899	0.679905	0.0098956	2.32108	-0.0289879	-0.0670142	-0.096002	-0.096002	0.390545	0.250691	86.55	389648100	130362000	0.609455	0.468404
2013	137	SC Firm 137	1	US	1	MAN	1	OILGAS	1	0.381407	0.231664	0.0956827	0.0491958	0.165749	1.64638	18.3899	0.70255	0.0234975	2.21931	0.00551602	-0.0305789	-0.0250629	-0.0250629	0.381407	0.231664	101.2	438702000	132275000	0.618593	0.432822
2014	137	SC Firm 137	1	US	1	MAN	1	OILGAS	1	0.388746	0.259161	0.119963	0.0697503	0.14701	1.50002	18.3899	0.722956	0.0132138	2.3882	0.0102692	-0.0625363	-0.0522671	-0.0522671	0.388746	0.259161	92.45	388382450	135864000	0.611254	0.417671
2004	138	SC Firm 138	1	US	1	MAN	9000	TECH	1	0.146559	0.0475251	0	0	0.0881908	3.08382	12.0505	0.0331509	0.0380574	3.78574	0.0423053	0.410394	0.4527	0.4527	0.146559	0.0475251	24.36	1059155	52848	0.853441	0.146559
2005	138	SC Firm 138	1	US	1	MAN	9000	TECH	1	0.144256	0.0441953	0	0	0.145154	3.26406	12.5476	0.030048	0.041893	3.34522	0.0459777	0.196229	0.242207	0.242207	0.144256	0.0441953	28.595	1677638	77572	0.855744	0.144256
2006	138	SC Firm 138	1	US	1	MAN	9000	TECH	1	0.154971	0.0490757	0	0	0.13944	3.1578	12.8842	0.0410563	0.00383344	2.66663	0.0486367	0.123762	0.172399	0.172399	0.154971	0.0490757	37.105	2190594	113053	0.845029	0.154971
2007	138	SC Firm 138	1	US	1	MAN	9000	TECH	1	0.18396	0.0524527	0	0	0.136996	3.50716	13.1724	0.0381494	0.00237657	1.77857	0.0642368	0.0816689	0.145906	0.145906	0.18396	0.0524527	28.52	3138055	173711	0.81604	0.18396
2008	138	SC Firm 138	1	US	1	MAN	9000	TECH	1	0.235263	0.106737	0	0	0.136504	2.20414	13.385	0.0506344	0.00625494	-0.291621	0.0503107	-0.134844	-0.0845337	-0.0845337	0.235263	0.106737	22.86	1849218	220964	0.764737	0.235263
2009	138	SC Firm 138	1	US	1	MAN	9000	TECH	1	0.252305	0.079921	0	0	0.142854	3.15694	13.3895	0.036842	0.00480153	-2.77553	0.0455352	-0.0100819	0.0354533	0.0354533	0.252305	0.079921	52.97	3104020	269625	0.747695	0.252305
2010	138	SC Firm 138	1	US	1	MAN	9000	TECH	1	0.263174	0.0412055	0	0	0.187848	6.38687	13.6899	0.025075	0.0369172	2.53192	0.0652397	0.0392933	0.104533	0.104533	0.263174	0.0412055	130.16	8341653	358494	0.736826	0.263174
2011	138	SC Firm 138	1	US	1	MAN	9000	TECH	1	0.295249	0.0760902	0	0	0.397801	3.88025	13.9569	0.0306003	0.129833	1.60145	0.0666979	-0.0890371	-0.0223391	-0.0223391	0.295249	0.0760902	106.12	5623252	463113	0.704751	0.295249
2012	138	SC Firm 138	1	US	1	MAN	9000	TECH	1	0.304416	0.0659748	0	0	0.240142	4.61413	14.1356	0.0311867	0.129833	2.32108	0.0621013	-0.0268009	0.0353003	0.0353003	0.304416	0.0659748	97.15	8236738	581801	0.695584	0.304416
2013	138	SC Firm 138	1	US	1	MAN	9000	TECH	1	0.307769	0.0929299	0	0	0.20807	3.31184	14.2084	0.0284781	0.0206692	2.21931	0.0469368	-0.0280899	0.0188469	0.0188469	0.307769	0.0929299	90.86	6700747	686496	0.692231	0.310166
2014	138	SC Firm 138	1	US	1	MAN	9000	TECH	1	0.371638	0.0852385	0	0	0.246998	4.35998	14.3648	0.0305687	0.0223959	2.3882	0.0574453	-0.114712	-0.0572663	-0.0572663	0.371638	0.0852385	130.465	8714329	812011	0.628362	0.373299
2004	139	SC Firm 139	1	US	0	SERV	5000	CSERV	1	0.284355	0.0449884	0	0	0.397801	6.32064	12.4368	0.190969	0.0576113	3.78574	0.0932948	-0.208	-0.114705	-0.114705	0.284355	0.0449884	38.96	1387905	65381	0.715645	0.284355
2005	139	SC Firm 139	1	US	0	SERV	5000	CSERV	1	0.209375	0.0412334	0	0	0.366413	5.07782	12.6528	0.150661	0.0475884	3.34522	0.0212443	0.13785	0.159095	0.159095	0.209375	0.0412334	41.16	1691924	72764	0.790625	0.228531
2006	139	SC Firm 139	1	US	0	SERV	5000	CSERV	1	0.196847	0.0400725	0.00498559	0.000852694	0.318414	4.91228	12.8671	0.130814	0.0342489	2.66663	0.0377055	0.0442864	0.0819919	0.0819919	0.196847	0.0400725	56.48	2156026	90004	0.803153	0.211492
2007	139	SC Firm 139	1	US	0	SERV	5000	CSERV	1	0.206184	0.0359301	0	0	0.350532	5.73848	13.0728	0.15073	0.0218131	1.77857	0.0343389	-0.0830492	-0.0487103	-0.0487103	0.206184	0.0359301	55.7	2897538	107989	0.793816	0.218499
2008	139	SC Firm 139	1	US	0	SERV	5000	CSERV	1	0.198682	0.0373403	0	0	0.365395	5.32086	13.263	0.155146	0.012023	-0.291621	0.0148006	-0.072656	-0.0578554	-0.0578554	0.198682	0.0373403	44.24	3008121	116681	0.801318	0.207404
2009	139	SC Firm 139	1	US	0	SERV	5000	CSERV	1	0.202719	0.0475787	0	0	0.387143	4.26071	13.3407	0.13941	0.0139728	-2.77553	0.0186655	-0.117359	-0.0986936	-0.0986936	0.202719	0.0475787	65.87	2572569	128514	0.797281	0.209989
2010	139	SC Firm 139	1	US	0	SERV	5000	CSERV	1	0.214814	0.0392988	0	0	0.397801	5.46618	13.3709	0.123323	0.00774103	2.53192	0.0154466	-0.1699	-0.154454	-0.154454	0.214814	0.0392988	93.76	3385075	138471	0.785186	0.220602
2011	139	SC Firm 139	1	US	0	SERV	5000	CSERV	1	0.210726	0.0337994	0	0	0.397801	6.23463	13.496	0.124148	0.0132174	1.60145	0.000104953	-0.171074	-0.170969	-0.170969	0.210726	0.0337994	87.28	3960354	138540	0.789274	0.216373
2012	139	SC Firm 139	1	US	0	SERV	5000	CSERV	1	0.200659	0.0329677	0	0	0.397801	6.08654	13.5996	0.110251	0.0217482	2.32108	0.00107471	0.410394	0.411469	0.411469	0.200659	0.0329677	88.06	4085643	139286	0.799341	0.204394
2013	139	SC Firm 139	1	US	0	SERV	5000	CSERV	1	0.211566	0.0318806	0	0	0.397801	6.63619	13.6625	0.0947135	0.0010441	2.21931	0.00975953	-0.208	-0.198241	-0.198241	0.211566	0.0318806	108.58	4434253	146022	0.788434	0.215037
2014	139	SC Firm 139	1	US	0	SERV	5000	CSERV	1	0.224979	0.0272597	0	0	0.397801	7.29543	13.7325	0.0869119	0.0451772	2.3882	0.0048054	-0.208	-0.203195	-0.203195	0.224979	0.0272597	140.75	5324403	149209	0.775021	0.229384
2004	140	SC Firm 140	1	US	1	MAN	9000	TECH	1	0.365667	0.206369	0.303843	0.164494	0.156603	1.77191	13.4677	0.0368831	0.00506719	3.78574	-0.0812048	-0.0214206	-0.102625	-0.102625	0.365667	0.206369	36.68	2031707	528308	0.634333	0.088808
2005	140	SC Firm 140	1	US	1	MAN	9000	TECH	1	0.404102	0.160304	0.331924	0.122705	0.180015	2.52085	13.5907	0.0358503	0.0123855	3.34522	0.0130705	-0.178089	-0.165018	-0.165018	0.404102	0.160304	44.17	2859853	545967	0.595898	0.108039
2006	140	SC Firm 140	1	US	1	MAN	9000	TECH	1	0.417178	0.202467	0.341872	0.155574	0.168587	2.06047	13.5709	0.042848	0.00792779	2.66663	0.00394337	-0.101008	-0.0970644	-0.0970644	0.417178	0.202467	40.65	2171124	551177	0.582822	0.114424
2007	140	SC Firm 140	1	US	1	MAN	9000	TECH	1	0.556101	0.27785	0.497627	0.23326	0.162969	2.00144	13.5724	0.0399813	0.00371948	1.77857	0.124066	-0.208	-0.0839341	-0.0839341	0.556101	0.27785	32.15	1843921	709457	0.443899	0.116395
2010	141	SC Firm 141	1	US	1	MAN	9000	TECH	1	0.344708	0.251423	0.20928	0.144559	0.193932	1.37103	14.2853	0.372776	0.0780829	2.53192	-0.0352604	-0.00221729	-0.0374777	-0.0374777	0.344708	0.251423	15.61	1897770	637400	0.655292	0.189119
2011	141	SC Firm 141	1	US	1	MAN	9000	TECH	1	0.301822	0.275796	0.181615	0.163526	0.164541	1.09437	14.2785	0.395168	0.0159557	1.60145	-0.0272601	-0.00123909	-0.0284991	-0.0284991	0.301822	0.275796	12.04	1535080	584600	0.698178	0.161237
2012	141	SC Firm 141	1	US	1	MAN	9000	TECH	1	0.258135	0.214028	0.151787	0.122843	0.103721	1.20608	14.1562	0.406019	0.038847	2.32108	-0.052179	0.0109878	-0.0411911	-0.0411911	0.258135	0.214028	14.4	1785833	486300	0.741865	0.140029
2013	141	SC Firm 141	1	US	1	MAN	9000	TECH	1	0.225056	0.195506	0.125699	0.107387	0.0940423	1.15114	14.1558	0.394154	0.0132271	2.21931	-0.0457127	-0.00601336	-0.0517261	-0.0517261	0.225056	0.195506	13.35	1663255	404200	0.774944	0.129065
2014	141	SC Firm 141	1	US	1	MAN	9000	TECH	1	0.27044	0.1824	0.13789	0.0878073	0.127228	1.48268	14.1756	0.371618	0.0221499	2.3882	0.0311408	-0.0735895	-0.0424486	-0.0424486	0.27044	0.1824	16.88	2047588	456800	0.72956	0.173998
2004	142	SC Firm 142	1	US	1	MAN	2000	IND	1	0.0984198	0.0244462	0	0	0.298595	6.12272	14.0294	0.249491	0.04251	3.78574	0.019823	0.0100727	0.0298957	0.0298957	0.0984198	0.0244462	15.39	4671011	76311	0.90158	0.117356
2005	142	SC Firm 142	1	US	1	MAN	2000	IND	1	0.102848	0.0244462	0	0	0.334126	6.74391	14.2364	0.252179	0.0236497	3.34522	0.0171083	-0.0164432	0.000665142	0.000665142	0.102848	0.0244462	19.565	5910782	91538	0.897152	0.119642
2006	142	SC Firm 142	1	US	1	MAN	2000	IND	1	0.0999946	0.0244462	0	0	0.340382	5.32157	14.4085	0.254115	0.00465636	2.66663	0.0118939	0.0102703	0.0221642	0.0221642	0.0999946	0.0244462	17.94	5425297	103896	0.900005	0.112532
2007	142	SC Firm 142	1	US	1	MAN	2000	IND	1	0.118473	0.0244462	0	0	0.355721	5.30088	14.5391	0.237844	0.0109735	1.77857	0.0291429	-0.00288033	0.0262626	0.0262626	0.118473	0.0244462	20.21	6027459	137791	0.881527	0.131463
2008	142	SC Firm 142	1	US	1	MAN	2000	IND	1	0.113479	0.0277958	0	0	0.375472	4.08258	14.6658	0.248577	0.015413	-0.291621	0.00782273	-0.00560365	0.00221907	0.00221907	0.113479	0.0277958	17.425	5176295	147993	0.886521	0.124135
2009	142	SC Firm 142	1	US	1	MAN	2000	IND	1	0.0900352	0.0244462	0	0	0.253684	4.71502	14.4732	0.252384	0.0861812	-2.77553	-0.0214592	0.00775676	-0.0137024	-0.0137024	0.0900352	0.0244462	20.82	6139015	119509	0.909965	0.102847
2010	142	SC Firm 142	1	US	1	MAN	2000	IND	1	0.110459	0.0244462	0	0	0.320428	6.12604	14.6351	0.247513	0.0489228	2.53192	0.0290652	0.0106975	0.0397628	0.0397628	0.110459	0.0244462	29.955	8832574	162185	0.889541	0.126523
2011	142	SC Firm 142	1	US	1	MAN	2000	IND	1	0.111468	0.0244462	0	0	0.367672	7.29543	14.8332	0.258525	0.0342726	1.60145	0.0152129	0.0147447	0.0299576	0.0299576	0.111468	0.0244462	43.61	12876231	187818	0.888532	0.134112
2012	142	SC Firm 142	1	US	1	MAN	2000	IND	1	0.112441	0.0244462	0	0	0.397801	7.29543	14.9577	0.284402	0.0209641	2.32108	0.00900744	0.0337575	0.042765	0.042765	0.112441	0.0244462	46.65	13834728	204174	0.887559	0.140691
2013	142	SC Firm 142	1	US	1	MAN	2000	IND	1	0.115538	0.0244462	0	0	0.373933	6.90756	15.0173	0.315471	0.019642	2.21931	0.0171781	0.00631761	0.0234957	0.0234957	0.115538	0.0244462	47.51	14098761	239832	0.884462	0.146011
2014	142	SC Firm 142	1	US	1	MAN	2000	IND	1	0.159108	0.0259817	0.0433997	0.00635527	0.364248	6.12387	15.1329	0.323805	0.00676468	2.3882	0.057446	-0.0210979	0.0363482	0.0363482	0.159108	0.0259817	47.56	14071475	375353	0.840892	0.150008
2004	143	SC Firm 143	1	US	1	MAN	2000	IND	1	0.470986	0.262473	0.20574	0.093828	0.192854	1.79441	17.1952	0.472603	0.0163417	3.78574	-0.0187218	0.0142129	-0.00450892	-0.00450892	0.470986	0.262473	103.39	27003221	9610000	0.529014	0.39306
2005	143	SC Firm 143	1	US	1	MAN	2000	IND	1	0.432437	0.226874	0.159399	0.0680628	0.200926	1.90607	17.2904	0.474658	0.00829446	3.34522	0.0089026	0.0167034	0.025606	0.025606	0.432437	0.226874	108.62	33436620	9812000	0.567563	0.385059
2006	143	SC Firm 143	1	US	1	MAN	2000	IND	1	0.435292	0.233057	0.163343	0.0714653	0.209083	1.86775	17.377	0.5265	0.00259236	2.66663	0.0264583	-0.051125	-0.0246667	-0.0246667	0.435292	0.233057	89.17	34378960	10447000	0.564708	0.362417
2007	143	SC Firm 143	1	US	1	MAN	2000	IND	1	0.383997	0.256563	0.112822	0.0657718	0.187922	1.4967	17.4519	0.525807	0.0149489	1.77857	-0.0235634	0.0470097	0.0234463	0.0234463	0.383997	0.256563	64.15	28521810	9843000	0.616003	0.354972
2008	143	SC Firm 143	1	US	1	MAN	2000	IND	1	0.393788	0.355685	0.149479	0.129948	0.15773	1.10713	17.385	0.553415	0.0246678	-0.291621	-0.0122092	-0.0416598	-0.053869	-0.053869	0.393788	0.355685	83.45	17294160	9547000	0.606212	0.331422
2009	143	SC Firm 143	1	US	1	MAN	2000	IND	1	0.409606	0.280098	0.116041	0.0685714	0.159304	1.46237	17.3632	0.577664	0.000342122	-2.77553	0.0262228	-0.041844	-0.0156212	-0.0156212	0.409606	0.280098	93.01	26215860	10200000	0.590394	0.367882
2010	143	SC Firm 143	1	US	1	MAN	2000	IND	1	0.395435	0.267298	0.0923743	0.0537157	0.160635	1.47938	17.4868	0.567573	0.0064548	2.53192	0.0229688	0.0202301	0.0431988	0.0431988	0.395435	0.267298	83.51	29683880	10829000	0.604565	0.382691
2011	143	SC Firm 143	1	US	1	MAN	2000	IND	1	0.479551	0.33664	0.0967499	0.0557071	0.181855	1.42452	17.5692	0.576798	0.0148067	1.60145	0.117413	-0.095676	0.0217369	0.0217369	0.479551	0.33664	91.72	28257380	14340000	0.520449	0.451761
2012	143	SC Firm 143	1	US	1	MAN	2000	IND	1	0.432478	0.321506	0.135662	0.088919	0.222838	1.34516	17.6062	0.55066	0.0288008	2.32108	0.00527304	0.062621	0.0678941	0.0678941	0.432478	0.321506	143.77	30636120	14517000	0.567522	0.392618
2013	143	SC Firm 143	1	US	1	MAN	2000	IND	1	0.474116	0.254852	0.214073	0.0936538	0.193589	1.86035	17.6347	0.59117	0.025735	2.21931	0.0351376	0.0190807	0.0542183	0.0542183	0.474116	0.254852	173.66	45842880	15679000	0.525884	0.394799
2014	143	SC Firm 143	1	US	1	MAN	2000	IND	1	0.54841	0.274707	0.302732	0.119262	0.128247	1.99635	17.6753	0.563139	0.0406942	2.3882	0.125442	-0.0356632	0.0897785	0.0897785	0.54841	0.274707	148.99	53673532	20329000	0.45159	0.399471
2011	144	SC Firm 144	1	US	1	MAN	2000	IND	1	0.354606	0.200184	0.112326	0.0545014	0.1466	1.7714	13.6249	0.0780634	0.0424601	1.60145	0.0361003	-0.0344029	0.00169739	0.00169739	0.354606	0.200184	40.78	1544175	386488	0.645394	0.278999
2012	144	SC Firm 144	1	US	1	MAN	2000	IND	1	0.305238	0.150025	0.0940411	0.0400333	0.145526	2.03458	13.7009	0.0890212	0.00376528	2.32108	-0.00790457	0.0391266	0.0312221	0.0312221	0.305238	0.150025	55.4704	2134390	376732	0.694762	0.24737
2013	144	SC Firm 144	1	US	1	MAN	2000	IND	1	0.238124	0.0827276	0	0	0.134311	2.87841	13.7402	0.110673	0.00849504	2.21931	-0.0260483	0.0844901	0.0584419	0.0584419	0.238124	0.0827276	89.36	3765273	339585	0.761876	0.244387
2014	144	SC Firm 144	1	US	1	MAN	2000	IND	1	0.25879	0.0885572	0	0	0.134849	2.92229	13.7708	0.115525	0.00424237	2.3882	0.0192775	-0.0735116	-0.054234	-0.054234	0.25879	0.0885572	90.35	3776359	366917	0.74121	0.265544
2009	145	SC Firm 145	1	US	1	MAN	9000	TECH	1	0.443325	0.196748	0.297981	0.115475	0.0851308	2.25326	13.3533	0.142348	0.0308559	-2.77553	0.0332312	0.337281	0.370512	0.370512	0.443325	0.196748	29.69	1134341	277845	0.556675	0.207418
2010	145	SC Firm 145	1	US	1	MAN	9000	TECH	1	0.210125	0.0685971	0.0541349	0.015598	0.176835	3.06318	13.7629	0.142002	0.0736912	2.53192	-0.103771	0.296195	0.192424	0.192424	0.210125	0.0685971	16.745	2525378	185992	0.789875	0.164918
2011	145	SC Firm 145	1	US	1	MAN	9000	TECH	1	0.20211	0.1148	0.0528555	0.0277777	0.103227	1.76054	13.7669	0.168983	0.0595042	1.60145	0.0102524	0.0323346	0.042587	0.042587	0.20211	0.1148	16.29	1510781	195931	0.79789	0.159618
2012	145	SC Firm 145	1	US	1	MAN	9000	TECH	1	0.199477	0.142598	0.0472533	0.0320422	0.0786121	1.39887	13.7476	0.199874	0.0214031	2.32108	0.00507121	0.0384612	0.0435324	0.0435324	0.199477	0.142598	23.92	1208806	201042	0.800523	0.159773
2013	145	SC Firm 145	1	US	1	MAN	9000	TECH	1	0.321517	0.152199	0.198898	0.0859714	0.121241	2.11248	13.9612	0.182517	0.0420211	2.21931	0.18727	0.0650845	0.252354	0.252354	0.321517	0.152199	19.41	2682056	481487	0.678483	0.153063
2014	145	SC Firm 145	1	US	1	MAN	9000	TECH	1	0.288739	0.170466	0.167074	0.0921785	0.0803115	1.69382	14.0394	0.20348	0.0377714	2.3882	-0.021521	0.0488742	0.0273532	0.0273532	0.288739	0.170466	14.54	2180520	448089	0.711261	0.14607
2008	146	SC Firm 146	1	US	1	MAN	1	OILGAS	1	0.284445	0.0517704	0.115962	0.0176971	0.237018	5.49436	14.0357	0.398497	0.0762942	-0.291621	0.154843	0.0318964	0.186739	0.186739	0.284445	0.0517704	137.96	11016385	601460	0.715555	0.190584
2009	146	SC Firm 146	1	US	1	MAN	1	OILGAS	1	0.208008	0.0575921	0.0618719	0.0151141	0.246876	3.61174	14.5412	0.295202	0.0012122	-2.77553	0.0284415	0.149158	0.1776	0.1776	0.208008	0.0575921	135.4	11400857	696725	0.791992	0.155774
2010	146	SC Firm 146	1	US	1	MAN	1	OILGAS	1	0.211272	0.0765023	0.0642929	0.0208072	0.205347	2.76165	14.7569	0.326634	0.0273511	2.53192	0.0522173	0.0314941	0.0837115	0.0837115	0.211272	0.0765023	130.14	11171675	925458	0.788728	0.157078
2011	146	SC Firm 146	1	US	1	MAN	1	OILGAS	1	0.369314	0.422282	0.154068	0.185232	0.106838	0.874566	14.833	0.314309	0.0737644	1.60145	0.209134	0.0395338	0.248667	0.248667	0.369314	0.422282	33.76	2919155	2133751	0.630686	0.254448
2004	147	SC Firm 147	1	US	1	MAN	2000	IND	1	0.678082	0.421348	0.183206	0.0719583	0.100786	1.60932	15.1319	0.0239414	0.00448456	3.78574	0.0913127	0.00310449	0.0944172	0.0944172	0.678082	0.421348	20.095	7806862	5684597	0.321918	0.621899
2005	147	SC Firm 147	1	US	1	MAN	2000	IND	1	0.564248	0.302315	0.184494	0.0703774	0.134613	1.86642	14.9914	0.0374224	0.0218754	3.34522	-0.250069	-0.0966067	-0.346676	-0.346676	0.564248	0.302315	21.635	7864505	3407784	0.435752	0.493151
2006	147	SC Firm 147	1	US	1	MAN	2000	IND	1	0.584933	0.289649	0.223054	0.0766966	0.121561	2.01945	15.0808	0.0351887	0.00206869	2.66663	0.0398618	-0.0778559	-0.0379941	-0.0379941	0.584933	0.289649	26.21	8968605	3657000	0.415067	0.492802
2004	148	SC Firm 148	1	US	1	MAN	2000	IND	1	0.486876	0.122217	0.388407	0.0852463	0.19441	3.98371	13.087	0.0551653	0.0112459	3.78574	0.0338831	0.138243	0.172126	0.172126	0.486876	0.122217	15.9475	2204519	306942	0.513124	0.177369
2005	148	SC Firm 148	1	US	1	MAN	2000	IND	1	0.460138	0.170295	0.356517	0.117714	0.205299	2.702	13.1393	0.0862736	0.0083199	3.34522	0.0149226	-0.0432826	-0.0283599	-0.0283599	0.460138	0.170295	11.165	1545593	317230	0.539862	0.183097
2006	148	SC Firm 148	1	US	1	MAN	2000	IND	1	0.497406	0.159277	0.386325	0.107549	0.197339	3.12289	13.2621	0.115462	0.00785056	2.66663	0.0999489	-0.0901399	0.00980896	0.00980896	0.497406	0.159277	15.915	2095528	397004	0.502594	0.184007
2007	148	SC Firm 148	1	US	1	MAN	2000	IND	1	0.389664	0.0852854	0.266287	0.0503341	0.212563	4.56894	13.5663	0.118004	0.0110925	1.77857	0.00208432	0.0852491	0.0873334	0.0873334	0.389664	0.0852854	31.3	4280901	399139	0.610336	0.170011
2008	148	SC Firm 148	1	US	1	MAN	2000	IND	1	0.314541	0.0825632	0.176893	0.0404428	0.261379	3.80969	13.8897	0.0985467	0.0296638	-0.291621	-0.00706644	0.0301947	0.0231283	0.0231283	0.314541	0.0825632	30.68	4337753	390369	0.685459	0.17205
2009	148	SC Firm 148	1	US	1	MAN	2000	IND	1	0.193084	0.0545448	0.0458803	0.0114607	0.260807	3.53992	13.9527	0.0930799	0.00222084	-2.77553	-0.0681117	0.083671	0.0155593	0.0155593	0.193084	0.0545448	32.73	5001995	288573	0.806916	0.155769
2010	148	SC Firm 148	1	US	1	MAN	2000	IND	1	0.173172	0.0635881	0	0	0.226296	2.72334	14.1437	0.101822	0.0271374	2.53192	0.0178038	0.0439411	0.0617449	0.0617449	0.173172	0.0635881	29.75	4736557	321641	0.826828	0.180259
2011	148	SC Firm 148	1	US	1	MAN	2000	IND	1	0.257245	0.124574	0.135408	0.0604584	0.181561	2.065	14.2499	0.0866725	0.0341247	1.60145	0.107582	-0.057178	0.0504045	0.0504045	0.257245	0.124574	25.07	3885073	552848	0.742755	0.148938
2012	148	SC Firm 148	1	US	1	MAN	2000	IND	1	0.260964	0.149435	0.132984	0.0709025	0.16755	1.74634	14.1558	0.096599	0.00384721	2.32108	0.00859789	-0.0717785	-0.0631806	-0.0631806	0.260964	0.149435	22.3157	3253941	571683	0.739036	0.156316
2013	148	SC Firm 148	1	US	1	MAN	2000	IND	1	0.30628	0.144841	0.192497	0.0837886	0.151579	2.1146	14.2186	0.0998742	0.0109674	2.21931	0.0623212	-0.0507596	0.0115616	0.0115616	0.30628	0.144841	30.1	4237538	717724	0.69372	0.146137
2014	148	SC Firm 148	1	US	1	MAN	2000	IND	1	0.310254	0.139375	0.186805	0.076388	0.148365	2.22604	14.2412	0.104967	0.00051896	2.3882	0.00536146	-0.0549349	-0.0495734	-0.0495734	0.310254	0.139375	32.31	4509797	730345	0.689746	0.157715
2006	149	SC Firm 149	1	US	1	MAN	3000	CGOODS	1	0.326866	0.153708	0.124187	0.0503651	0.198166	2.12654	14.4514	0.512296	0.00752033	2.66663	0.000225019	0.00360472	0.00382974	0.00382974	0.326866	0.153708	7.99705	1631563	296333	0.673134	0.283695
2007	149	SC Firm 149	1	US	1	MAN	3000	CGOODS	1	0.283885	0.113102	0.0399502	0.0132095	0.212491	2.50999	14.5268	0.492663	0.0129165	1.77857	-0.0161888	0.0447194	0.0285306	0.0285306	0.283885	0.113102	10.4045	2198357	280346	0.716115	0.305703
2008	149	SC Firm 149	1	US	1	MAN	3000	CGOODS	1	0.489945	0.233778	0.293266	0.116454	0.189271	2.09577	14.6972	0.433917	0.00740081	-0.291621	0.282779	-0.0613127	0.221466	0.221466	0.489945	0.233778	10.56	2173079	663015	0.510055	0.319313
2009	149	SC Firm 149	1	US	1	MAN	3000	CGOODS	1	0.423066	0.189881	0.244015	0.0935215	0.210329	2.22806	14.7713	0.445876	0.0108545	-2.77553	-0.0675323	0.0157883	-0.051744	-0.051744	0.423066	0.189881	11.96	2439349	571749	0.576934	0.284014
2006	150	SC Firm 150	1	US	1	MAN	2000	IND	1	0.631542	0.390571	0.348121	0.166441	0.098283	1.61697	14.9343	0.154359	0.00500111	2.66663	0.0294113	0.01957	0.0489813	0.0489813	0.631542	0.390571	16.8233	2827430	1812041	0.368458	0.447534
2007	150	SC Firm 150	1	US	1	MAN	2000	IND	1	0.620418	0.287346	0.294561	0.0933866	0.128556	2.15913	15.1406	0.138873	0.0235761	1.77857	0.105695	0.0248541	0.130549	0.130549	0.620418	0.287346	32.0666	5416926	2184131	0.379582	0.474224
2008	150	SC Firm 150	1	US	1	MAN	2000	IND	1	0.65575	0.4813	0.292748	0.167797	0.16432	1.36246	15.3137	0.136003	0.0262389	-0.291621	0.112933	-0.0836047	0.0293283	0.0293283	0.65575	0.4813	17.1666	2843573	2638539	0.34425	0.517578
2009	150	SC Firm 150	1	US	1	MAN	2000	IND	1	0.568698	0.317466	0.236207	0.0983609	0.182924	1.79137	15.2892	0.13191	0.0082474	-2.77553	-0.0522964	0.0188894	-0.033407	-0.033407	0.568698	0.317466	31.51	5194991	2416337	0.431302	0.443893
2010	150	SC Firm 150	1	US	1	MAN	2000	IND	1	0.517177	0.260021	0.19683	0.074411	0.153433	1.98899	15.2098	0.130327	0.0210294	2.53192	-0.0246131	-0.000250678	-0.0248637	-0.0248637	0.517177	0.260021	39.74	6564134	2306565	0.482823	0.410138
2011	150	SC Firm 150	1	US	1	MAN	2000	IND	1	0.498801	0.301025	0.179023	0.0862267	0.154974	1.65701	15.3219	0.129525	0.00111577	1.60145	-0.000173279	-0.0418246	-0.0419979	-0.0419979	0.498801	0.301025	33.1066	5353944	2305764	0.501199	0.399684
2012	150	SC Firm 150	1	US	1	MAN	2000	IND	1	0.593486	0.287784	0.321946	0.11615	0.159231	2.06226	15.3739	0.135977	0.00328384	2.32108	0.114212	-0.152758	-0.0385453	-0.0385453	0.593486	0.287784	48.9333	7066218	2855234	0.406514	0.414085
2013	150	SC Firm 150	1	US	1	MAN	2000	IND	1	0.606763	0.22036	0.377342	0.0999177	0.164324	2.7535	15.4158	0.142213	0.00442534	2.21931	0.0398808	-0.0756794	-0.0357986	-0.0357986	0.606763	0.22036	78.83	10812559	3056103	0.393237	0.390344
2014	150	SC Firm 150	1	US	1	MAN	2000	IND	1	0.587292	0.266314	0.36032	0.12563	0.178742	2.20526	15.4002	0.13967	0.00943528	2.3882	-0.0278632	-0.0725913	-0.100455	-0.100455	0.587292	0.266314	59.83	8038101	2917678	0.412708	0.37873
2004	151	SC Firm 151	1	US	1	MAN	2000	IND	1	0.663491	0.363682	0.263369	0.0939071	0.0924199	1.82437	16.0541	0.132964	0.00494311	3.78574	0.0690236	0.0304918	0.0995154	0.0995154	0.663491	0.363682	27.255	4608172	2633765	0.336509	0.543178
2005	151	SC Firm 151	1	US	1	MAN	2000	IND	1	0.643551	0.304362	0.205606	0.0590204	0.086637	2.11443	16.3928	0.127128	0.00429266	3.34522	0.0677945	0.0268682	0.0946626	0.0946626	0.643551	0.304362	38.63	6728434	2943887	0.356449	0.551294
2006	151	SC Firm 151	1	US	1	MAN	2000	IND	1	0.645022	0.304307	0.244369	0.0722271	0.10335	2.11964	16.4602	0.141978	0.00961378	2.66663	0.0411316	-0.0191622	0.0219694	0.0219694	0.645022	0.304307	40.825	7188572	3144398	0.354978	0.530223
2007	151	SC Firm 151	1	US	1	MAN	2000	IND	1	0.607593	0.214158	0.125001	0.0245269	0.133173	2.83713	16.6304	0.135328	0.0214775	1.77857	0.0650984	0.0217657	0.0868641	0.0868641	0.607593	0.214158	72.86	12922788	3521720	0.392407	0.551535
2008	151	SC Firm 151	1	US	1	MAN	2000	IND	1	0.584138	0.315351	0.0534739	0.0181885	0.186101	1.85234	16.9213	0.124516	0.0373594	-0.291621	0.0358889	-0.0326078	0.00328104	0.00328104	0.584138	0.315351	44.87	8146414	3752255	0.415862	0.560644
2009	151	SC Firm 151	1	US	1	MAN	2000	IND	1	0.539522	0.324715	0.0371473	0.0155869	0.181978	1.66152	16.9061	0.116603	0.00286777	-2.77553	0.0168134	0.00553334	0.0223468	0.0223468	0.539522	0.324715	45.04	8054261	3872950	0.460478	0.521757
2010	151	SC Firm 151	1	US	1	MAN	2000	IND	1	0.54077	0.260499	0.0316911	0.00969564	0.0973307	2.0759	16.8528	0.113769	0.0596233	2.53192	0.0321703	-0.00998868	0.0221816	0.0221816	0.54077	0.260499	66.26	11689931	4117924	0.45923	0.52574
2011	151	SC Firm 151	1	US	1	MAN	2000	IND	1	0.589335	0.364623	0.135665	0.059059	0.143607	1.61629	16.9675	0.111459	0.0331498	1.60145	0.0913016	-0.0703972	0.0209044	0.0209044	0.589335	0.364623	50.25	8491205	4872839	0.410665	0.524878
2012	151	SC Firm 151	1	US	1	MAN	2000	IND	1	0.596269	0.340991	0.13935	0.0536809	0.11435	1.74863	17.1325	0.114941	0.0215638	2.32108	0.00748051	-0.0073946	8.59106e-05	8.59106e-05	0.596269	0.340991	58.74	9537021	4934748	0.403731	0.5309
2013	151	SC Firm 151	1	US	1	MAN	2000	IND	1	0.548648	0.260715	0.122902	0.0390645	0.167501	2.10439	17.1243	0.116167	0.0381365	2.21931	-0.0441965	-0.00329787	-0.0474944	-0.0474944	0.548648	0.260715	80.29	12949799	4566863	0.451352	0.485403
2014	151	SC Firm 151	1	US	1	MAN	2000	IND	1	0.620368	0.360658	0.246999	0.101716	0.172341	1.7201	16.885	0.119626	0.00439603	2.3882	0.0630544	-0.0242908	0.0387637	0.0387637	0.620368	0.360658	60.63	9011658	5083558	0.379632	0.495841
2006	152	SC Firm 152	1	US	1	MAN	1000	BMAT	1	0.631408	0.371057	0.383987	0.176738	0.167621	1.70165	14.6682	0.374029	0.0133721	2.66663	-0.0183165	-0.0160543	-0.0343708	-0.0343708	0.631408	0.371057	19.1375	2933207	1730500	0.368592	0.401649
2007	152	SC Firm 152	1	US	1	MAN	1000	BMAT	1	0.610631	0.289402	0.338739	0.117411	0.192654	2.10998	14.7836	0.341955	0.0171183	1.77857	-0.0224629	-0.0163167	-0.0387795	-0.0387795	0.610631	0.289402	27.275	4098309	1669100	0.389369	0.411173
2008	152	SC Firm 152	1	US	1	MAN	1000	BMAT	1	0.69842	0.391986	0.408516	0.161263	0.225291	1.78175	14.9518	0.313705	0.0283314	-0.291621	0.14092	-0.143726	-0.0028057	-0.0028057	0.69842	0.391986	22.365	3243370	2091000	0.30158	0.49013
2009	152	SC Firm 152	1	US	1	MAN	1000	BMAT	1	0.656782	0.337481	0.374295	0.137364	0.189624	1.94613	14.8544	0.307538	0.0245658	-2.77553	-0.00994835	-0.00596263	-0.015911	-0.015911	0.656782	0.337481	27.88	4043653	2059800	0.343218	0.45147
2010	152	SC Firm 152	1	US	1	MAN	1000	BMAT	1	0.659176	0.277034	0.360518	0.100474	0.202596	2.37941	14.9522	0.276665	0.00939642	2.53192	0.0387361	-0.0243983	0.0143378	0.0143378	0.659176	0.277034	39.945	5711004	2188400	0.340824	0.467032
2011	152	SC Firm 152	1	US	1	MAN	1000	BMAT	1	0.668599	0.294054	0.399574	0.120801	0.192414	2.27372	14.9262	0.263604	0.00265829	1.60145	0.0840123	-0.0571925	0.0268198	0.0268198	0.668599	0.294054	43.02	6008789	2502900	0.331401	0.448057
2012	152	SC Firm 152	1	US	1	MAN	1000	BMAT	1	0.661561	0.264254	0.394486	0.106908	0.183909	2.5035	15.0422	0.218615	0.0043776	2.32108	0.0893253	-0.0275726	0.0617527	0.0617527	0.661561	0.264254	58.52	8056471	2893600	0.338439	0.441071
2013	152	SC Firm 152	1	US	1	MAN	1000	BMAT	1	0.695733	0.266448	0.537593	0.155891	0.159325	2.61114	15.17	0.238444	0.0122865	2.21931	0.143013	-0.0206678	0.122345	0.122345	0.695733	0.266448	75.46	10027554	3642300	0.304267	0.355956
2014	152	SC Firm 152	1	US	1	MAN	1000	BMAT	1	0.703811	0.330819	0.514845	0.18085	0.155922	2.12748	15.2112	0.174141	0.00259758	2.3882	0.0217957	-0.0446213	-0.0228256	-0.0228256	0.703811	0.330819	57.03	7603107	3758700	0.296189	0.399101
2005	153	SC Firm 153	1	US	1	MAN	1	OILGAS	1	0.666205	0.32325	0.267846	0.0805033	0.110088	2.06096	14.6407	0.16821	0.0261437	3.34522	0.0784501	-0.0328307	0.0456194	0.0456194	0.666205	0.32325	10.186	2922852	1396100	0.333795	0.544092
2006	153	SC Firm 153	1	US	1	MAN	1	OILGAS	1	0.643862	0.278598	0.197754	0.0500218	0.116287	2.31108	14.8855	0.178632	0.0126006	2.66663	0.0826835	-0.0360961	0.0465873	0.0465873	0.643862	0.278598	14.6264	4147699	1601800	0.356138	0.556074
2007	153	SC Firm 153	1	US	1	MAN	1	OILGAS	1	0.681822	0.229962	0.104636	0.0160253	0.136215	2.96494	15.1099	0.140855	0.0140967	1.77857	0.18299	-0.0518202	0.13117	0.13117	0.681822	0.229962	26.9128	7331310	2189400	0.318178	0.644639
2008	153	SC Firm 153	1	US	1	MAN	1	OILGAS	1	0.807199	0.492682	0.417581	0.142595	0.168505	1.63838	15.3308	0.138205	0.0221053	-0.291621	0.195789	-0.178922	0.0168673	0.0168673	0.807199	0.492682	11.915	2976367	2890500	0.192801	0.668966
2009	153	SC Firm 153	1	US	1	MAN	1	OILGAS	1	0.688674	0.25797	0.275061	0.0562759	0.175205	2.66958	15.2983	0.163621	0.000582891	-2.77553	-0.124086	0.0165617	-0.107524	-0.107524	0.688674	0.25797	28.92	7044912	2449200	0.311326	0.571786
2010	153	SC Firm 153	1	US	1	MAN	1	OILGAS	1	0.614291	0.173669	0.205382	0.0329831	0.179161	3.53713	15.2327	0.167115	0.00163242	2.53192	-0.0577905	-0.0212941	-0.0790846	-0.0790846	0.614291	0.173669	44.455	10651418	2238600	0.385709	0.540366
2011	153	SC Firm 153	1	US	1	MAN	1	OILGAS	1	0.640248	0.180438	0.28869	0.0478078	0.156919	3.5483	15.4446	0.179794	0.0139194	1.60145	0.116109	-0.0629595	0.0531491	0.0531491	0.640248	0.180438	52.23	12420294	2734500	0.359752	0.52044
2012	153	SC Firm 153	1	US	1	MAN	1	OILGAS	1	0.679005	0.282996	0.46408	0.1391	0.129191	2.39934	15.6322	0.210659	0.0192726	2.32108	0.215758	-0.0121466	0.203612	0.203612	0.679005	0.282996	42.83	10154993	4008100	0.320995	0.410849
2013	153	SC Firm 153	1	US	1	MAN	1	OILGAS	1	0.635537	0.254128	0.363062	0.100213	0.141774	2.50086	15.7793	0.204236	0.00395235	2.21931	0.0287635	0.00171067	0.0304741	0.0304741	0.635537	0.254128	52.21	12321560	4198100	0.364463	0.441459
2014	153	SC Firm 153	1	US	1	MAN	1	OILGAS	1	0.649949	0.300464	0.342086	0.107368	0.17543	2.16315	15.8878	0.203344	0.0233344	2.3882	0.0646115	-0.0829743	-0.0183628	-0.0183628	0.649949	0.300464	46.84	10852828	4661500	0.350051	0.475509
2004	154	SC Firm 154	1	US	0	SERV	5000	CSERV	1	0.425703	0.283555	0.164119	0.0948857	0.168366	1.50131	15.4935	0.220884	0.00398628	3.78574	0.0315107	0.0518999	0.0834106	0.0834106	0.425703	0.283555	23.59	3481735	1378000	0.574297	0.321903
2005	154	SC Firm 154	1	US	0	SERV	5000	CSERV	1	0.377415	0.261603	0.136516	0.0845824	0.176932	1.4427	15.5477	0.203804	0.00318981	3.34522	-0.0386473	-0.00362319	-0.0422705	-0.0422705	0.377415	0.261603	21.93	3528230	1250000	0.622585	0.289553
2006	154	SC Firm 154	1	US	0	SERV	5000	CSERV	1	0.279778	0.296829	0.0909091	0.0980159	0.180671	0.942557	15.5647	0.201293	0.00106513	2.66663	-0.104955	0.028932	-0.0760234	-0.0760234	0.279778	0.296829	13.66	2153368	909000	0.720222	0.221607
2007	154	SC Firm 154	1	US	0	SERV	5000	CSERV	1	0.299722	0.460185	0.0886838	0.162357	0.0755473	0.751684	15.5087	0.160654	0.0724417	1.77857	0.0194265	-0.0117175	0.00770891	0.00770891	0.299722	0.460185	7.34	1140196	972000	0.700278	0.234659
2008	154	SC Firm 154	1	US	0	SERV	5000	CSERV	1	0.327077	0.347444	0.0683349	0.0743709	0.10219	0.941379	15.4713	0.150156	0.0230826	-0.291621	-0.0107751	-0.0563087	-0.0670838	-0.0670838	0.327077	0.347444	11.14	1767348	941000	0.672923	0.281891
2009	154	SC Firm 154	1	US	0	SERV	5000	CSERV	1	0.308239	0.240071	0.0661553	0.0478237	0.0838068	1.28395	15.3953	0.137429	0.00917099	-2.77553	-0.0259233	0.0205966	-0.0053267	-0.0053267	0.308239	0.240071	19.62	2747597	868000	0.691761	0.259233
2010	154	SC Firm 154	1	US	0	SERV	5000	CSERV	1	0.30076	0.178491	0.0633673	0.0330454	0.131906	1.68502	15.4347	0.133287	0.0362532	2.53192	0.00103591	0.000345304	0.00138122	0.00138122	0.30076	0.178491	23.84	4008806	871000	0.69924	0.253453
2011	154	SC Firm 154	1	US	0	SERV	5000	CSERV	1	0.306557	0.152742	0.06	0.0253692	0.182295	2.00702	15.5424	0.14	0.0360099	1.60145	0.0209836	-0.0285246	-0.00754098	-0.00754098	0.306557	0.152742	32.12	5186419	935000	0.693443	0.263934
2012	154	SC Firm 154	1	US	0	SERV	5000	CSERV	1	0.292545	0.149277	0.0528827	0.0231446	0.220374	1.95975	15.6372	0.14553	0.0276469	2.32108	0.01485	-0.00623701	0.00861301	0.00861301	0.292545	0.149277	41.44	5613475	985000	0.707455	0.254529
2013	154	SC Firm 154	1	US	0	SERV	5000	CSERV	1	0.279036	0.114879	0.0523935	0.0182037	0.231718	2.42896	15.6881	0.1692	0.00583218	2.21931	-0.00344135	-0.0513335	-0.0547749	-0.0547749	0.279036	0.114879	56.18	7496792	973000	0.720964	0.244336
2010	155	SC Firm 155	1	US	1	MAN	9000	TECH	1	0.573809	0.115096	0	0	0.111908	4.98548	12.6906	0.0129368	0.0211237	2.53192	0.125054	0.0893932	0.214447	0.214447	0.573809	0.115096	16.175	2406225	312968	0.426191	0.573809
2011	155	SC Firm 155	1	US	1	MAN	9000	TECH	1	0.512276	0.100191	0	0	0.127911	5.11301	12.9798	0.0108418	0.0119742	1.60145	0.0863222	0.0862991	0.172621	0.172621	0.512276	0.100191	21.81	3380376	376393	0.487724	0.512276
2012	155	SC Firm 155	1	US	1	MAN	9000	TECH	1	0.476232	0.121135	0	0	0.112893	3.93141	13.1875	0.026282	0.0122753	2.32108	0.0903847	0.0878978	0.178282	0.178282	0.476232	0.121135	21.02	3370515	464563	0.523768	0.476232
2013	155	SC Firm 155	1	US	1	MAN	9000	TECH	1	0.498692	0.158651	0	0	0.073832	3.14333	13.3299	0.0313677	0.0286925	2.21931	0.101108	0.0543996	0.155508	0.155508	0.498692	0.158651	19.13	3090165	582704	0.501308	0.498692
2014	155	SC Firm 155	1	US	1	MAN	9000	TECH	1	0.525563	0.127959	0	0	0.0570785	4.10728	13.5546	0.0413532	0.0133105	2.3882	0.116583	0.0690804	0.185663	0.185663	0.525563	0.127959	30.66	5103142	748808	0.474437	0.525563
2006	156	SC Firm 156	1	US	1	MAN	3000	CGOODS	1	0.276068	0.0858108	0.0180381	0.00450114	0.182185	3.21717	14.0094	0.201149	0.00114441	2.66663	0.0533499	0.00949687	0.0628468	0.0628468	0.276068	0.0858108	41.98	2507577	235375	0.723932	0.280388
2007	156	SC Firm 156	1	US	1	MAN	3000	CGOODS	1	0.298227	0.224706	0.0167795	0.0115054	0.195328	1.32719	14.1753	0.16572	0.0151804	1.77857	0.0885627	0.0476489	0.136212	0.136212	0.298227	0.224706	16.7	1155138	334798	0.701773	0.300653
2008	156	SC Firm 156	1	US	1	MAN	3000	CGOODS	1	0.241215	0.104598	0.0119804	0.00443605	0.223869	2.30611	14.275	0.190682	0.0163586	-0.291621	-0.0667031	-0.0107983	-0.0775014	-0.0775014	0.241215	0.104598	33.56	2245155	262272	0.758785	0.253057
2009	156	SC Firm 156	1	US	1	MAN	3000	CGOODS	1	0.224573	0.0565304	0.00817254	0.00170184	0.19817	3.9726	14.2525	0.166369	0.0165888	-2.77553	0.019108	0.0200614	0.0391693	0.0391693	0.224573	0.0565304	70.48	4784290	286663	0.775427	0.239366
2004	157	SC Firm 157	1	US	0	SERV	5000	CSERV	1	0.508758	0.255518	0.276459	0.112393	0.26871	1.99108	16.6046	0.335987	0.0212528	3.78574	-0.0948447	-0.077926	-0.172771	-0.172771	0.508758	0.255518	17.64	14894417	5112000	0.491242	0.321059
2005	157	SC Firm 157	1	US	0	SERV	5000	CSERV	1	0.38499	0.176488	0.0863927	0.0313588	0.275592	2.18139	16.5893	0.367985	0.00444037	3.34522	-0.194536	-0.0524884	-0.247024	-0.247024	0.38499	0.176488	19.5	15846049	3396000	0.61501	0.326834
2006	157	SC Firm 157	1	US	0	SERV	5000	CSERV	1	0.394429	0.191853	0.0902057	0.0348776	0.214888	2.05589	16.5833	0.374181	0.0409053	2.66663	-0.00304307	-0.0894195	-0.0924625	-0.0924625	0.394429	0.191853	21.28	14195560	3370000	0.605571	0.334387
2007	157	SC Firm 157	1	US	0	SERV	5000	CSERV	1	0.454708	0.312842	0.0421336	0.0234522	0.250447	1.45347	16.5732	0.416816	0.018424	1.77857	0.0247512	-0.188441	-0.16369	-0.16369	0.454708	0.312842	13.39	7828320	3564000	0.545292	0.430722
2008	157	SC Firm 157	1	US	0	SERV	5000	CSERV	1	0.420016	0.197635	0.0112689	0.00386158	0.291645	2.12521	16.4915	0.387758	0.0253736	-0.291621	-0.0511634	-0.0807774	-0.131941	-0.131941	0.420016	0.197635	20.95	12898080	3177000	0.579984	0.413406
2009	157	SC Firm 157	1	US	0	SERV	5000	CSERV	1	0.387477	0.215106	0	0	0.311083	1.80133	16.4685	0.329117	0.0167866	-2.77553	-0.0103945	-0.0455855	-0.05598	-0.05598	0.387477	0.215106	22.14	11289600	3094000	0.612523	0.387477
2010	157	SC Firm 157	1	US	0	SERV	5000	CSERV	1	0.422505	0.245355	0.000734754	0.000326653	0.371408	1.72202	16.5009	0.362774	0.0358037	2.53192	-0.0154282	-0.208	-0.223428	-0.223428	0.422505	0.245355	18.55	9181050	2985000	0.577495	0.422081
2011	157	SC Firm 157	1	US	0	SERV	5000	CSERV	1	0.628806	0.234145	0.376697	0.0983455	0.275397	2.68554	16.493	0.339935	0.0592446	1.60145	0.226624	-0.208	0.0186233	0.0186233	0.628806	0.234145	31.04	15265110	4667000	0.371194	0.404473
2012	157	SC Firm 157	1	US	0	SERV	5000	CSERV	1	0.612584	0.212248	0.300966	0.0683501	0.335877	2.88617	16.566	0.350602	0.046061	2.32108	-0.0121821	-0.101205	-0.113387	-0.113387	0.612584	0.212248	39.08	16983680	4576000	0.387416	0.445783
2013	157	SC Firm 157	1	US	0	SERV	5000	CSERV	1	0.599312	0.213382	0.307116	0.0744062	0.341572	2.80864	16.5973	0.351382	0.00865431	2.21931	0.0163078	-0.0902026	-0.0738948	-0.0738948	0.599312	0.213382	42.11	17340990	4704000	0.400688	0.432284
2004	158	SC Firm 158	1	US	1	MAN	9000	TECH	1	0.157749	0.0260401	0	0	0.273196	6.0579	13.5444	0.153599	0.0160247	3.78574	0.0642864	0.03312	0.0974064	0.0974064	0.157749	0.0260401	30.42	6592781	176267	0.842251	0.162462
2005	158	SC Firm 158	1	US	1	MAN	9000	TECH	1	0.143503	0.0265398	0	0	0.278594	5.40709	13.8429	0.131529	0.00425277	3.34522	0.0141077	-0.0232111	-0.00910342	-0.00910342	0.143503	0.0265398	33.175	7170245	195485	0.856497	0.150467
2006	158	SC Firm 158	1	US	1	MAN	9000	TECH	1	0.178137	0.0273275	0.000159042	2.06181e-05	0.314831	6.51862	14.3887	0.132306	0.031173	2.66663	0.0750888	-0.0073062	0.0677826	0.0677826	0.178137	0.0273275	55.66	12028015	337930	0.821863	0.178634
2007	158	SC Firm 158	1	US	1	MAN	9000	TECH	1	0.282219	0.0413827	0	0	0.294646	6.81971	14.9725	0.113672	0.0117828	1.77857	0.17955	0.0337173	0.213267	0.213267	0.282219	0.0413827	97	21517907	928911	0.717781	0.285845
2008	158	SC Firm 158	1	US	1	MAN	9000	TECH	1	0.236727	0.151682	0	0	0.320268	1.56068	15.0666	0.151734	0.0127932	-0.291621	-0.0798297	-0.07298	-0.15281	-0.15281	0.236727	0.151682	19.17	3885039	694657	0.763273	0.241467
2009	158	SC Firm 158	1	US	1	MAN	9000	TECH	1	0.256386	0.136581	0	0	0.229919	1.87717	14.8961	0.11529	0.0625317	-2.77553	0.0749221	0.0137795	0.0887016	0.0887016	0.256386	0.136581	30.7	6204489	981465	0.743614	0.259042
2010	158	SC Firm 158	1	US	1	MAN	9000	TECH	1	0.233696	0.13642	0	0	0.182225	1.71306	14.805	0.107255	0.0323197	2.53192	-0.0123662	0.410394	0.398028	0.398028	0.233696	0.13642	30.99	5900710	932140	0.766304	0.235447
2011	158	SC Firm 158	1	US	1	MAN	9000	TECH	1	0.270569	0.135033	0	0	0.143492	2.00372	14.8302	0.0932842	0.0252948	1.60145	0.0620991	0.0125276	0.0746267	0.0746267	0.270569	0.135033	39.81	7749519	1209806	0.729431	0.271676
2012	158	SC Firm 158	1	US	1	MAN	9000	TECH	1	0.266617	0.141061	0	0	0.140737	1.89008	14.8146	0.085026	0.00107411	2.32108	0.0155744	0.0169508	0.0325252	0.0325252	0.266617	0.141061	40.75	7823674	1284861	0.733383	0.267129
2013	158	SC Firm 158	1	US	1	MAN	9000	TECH	1	0.249639	0.11797	0	0	0.133789	2.11611	14.7832	0.0850168	0.0054646	2.21931	-0.0136737	-0.0274123	-0.0410859	-0.0410859	0.249639	0.11797	46.19	9107655	1218139	0.750361	0.249999
2014	158	SC Firm 158	1	US	1	MAN	9000	TECH	1	0.26643	0.108057	0	0	0.163561	2.46564	14.8701	0.0918089	0.0208683	2.3882	0.00688215	-0.0453806	-0.0384985	-0.0384985	0.26643	0.108057	52.83	10321565	1250439	0.73357	0.274846
2009	159	SC Firm 159	1	US	1	MAN	9000	TECH	1	0.9074	0.389335	0.745128	0.159815	0.135306	2.33064	13.9464	0.043172	0.0263779	-2.77553	-0.00957558	0.0418727	0.0322971	0.0322971	0.9074	0.389335	18.04	1729635	1102744	0.0926001	0.63668
2010	159	SC Firm 159	1	US	1	MAN	9000	TECH	1	0.854506	0.256358	0.540642	0.0646191	0.15015	3.33326	14.069	0.0370347	0.00648956	2.53192	-0.0032217	-0.0169283	-0.02015	-0.02015	0.854506	0.256358	33.2	3186825	1098602	0.145494	0.683266
2011	159	SC Firm 159	1	US	1	MAN	9000	TECH	1	0.86826	0.269619	0.523856	0.058046	0.178369	3.22032	14.1998	0.0493756	0.023253	1.60145	0.072098	-0.103034	-0.0309362	-0.0309362	0.86826	0.269619	34.77	3245542	1198088	0.13174	0.686634
2012	159	SC Firm 159	1	US	1	MAN	9000	TECH	1	0.810845	0.234287	0.400647	0.0455405	0.171407	3.46091	14.2953	0.0549499	0.00147616	2.32108	0.0718668	-0.0252973	0.0465695	0.0465695	0.810845	0.234287	46.02	4296488	1314604	0.189155	0.684401
2013	159	SC Firm 159	1	US	1	MAN	9000	TECH	1	0.797421	0.178757	0.361989	0.0304193	0.173959	4.46092	14.3945	0.0514465	0.00113471	2.21931	0.0603628	-0.0718543	-0.0114915	-0.0114915	0.797421	0.178757	71.05	6534152	1422266	0.202579	0.682484
2014	159	SC Firm 159	1	US	1	MAN	9000	TECH	1	0.915367	0.191279	0.715332	0.0520893	0.182446	4.78551	14.5193	0.0514559	0.00502132	2.3882	0.168516	-0.201597	-0.0330806	-0.0330806	0.915367	0.191279	84.21	7370103	1743180	0.084633	0.686634
2009	160	SC Firm 160	1	US	1	MAN	3000	CGOODS	1	0.644916	0.32779	0.505841	0.215583	0.175045	1.96747	16.499	0.15889	0.0152312	-2.77553	-0.00768147	-0.053561	-0.0612425	-0.0612425	0.644916	0.32779	35.59	23381248	11401400	0.355084	0.330909
2010	160	SC Firm 160	1	US	1	MAN	3000	CGOODS	1	0.598763	0.306213	0.478864	0.213695	0.173183	1.95538	16.5155	0.15948	0.000928927	2.53192	-0.0117701	0.00784492	-0.00392514	-0.00392514	0.598763	0.306213	40.41	25334192	11181600	0.401237	0.290444
2011	160	SC Firm 160	1	US	1	MAN	3000	CGOODS	1	0.640083	0.347612	0.494558	0.226699	0.150682	1.84137	16.6284	0.153274	0.0161653	1.60145	0.110069	-0.0316162	0.0784527	0.0784527	0.640083	0.347612	40.42	25343380	13503700	0.359917	0.343441
2012	160	SC Firm 160	1	US	1	MAN	3000	CGOODS	1	0.644218	0.317436	0.497124	0.20249	0.151964	2.02944	16.6933	0.152273	0.000706164	2.32108	0.048239	-0.0121767	0.0360623	0.0360623	0.644218	0.317436	49.91	31386384	14596700	0.355782	0.353813
2013	160	SC Firm 160	1	US	1	MAN	3000	CGOODS	1	0.645688	0.312049	0.517219	0.210521	0.151047	2.06919	16.7008	0.150088	0.000181972	2.21931	0.0150438	-0.0408326	-0.0257888	-0.0257888	0.645688	0.312049	53.33	32947863	14944900	0.354312	0.33808
2014	160	SC Firm 160	1	US	1	MAN	3000	CGOODS	1	0.701488	0.313968	0.584014	0.214712	0.155836	2.23426	16.6851	0.172501	0.00230253	2.3882	0.020071	-0.0846887	-0.0646176	-0.0646176	0.701488	0.313968	57.66	33617005	15385100	0.298512	0.353085
2004	161	SC Firm 161	1	US	0	SERV	5000	CSERV	1	0.571936	0.28926	0.372131	0.152928	0.19282	1.97724	13.9223	0.265383	0.0108752	3.78574	0.200509	0.0186651	0.219175	0.219175	0.571936	0.28926	35.0747	893171	363506	0.428064	0.318227
2005	161	SC Firm 161	1	US	0	SERV	5000	CSERV	1	0.491704	0.266355	0.233516	0.102609	0.221539	1.84605	14.0654	0.274074	0.019266	3.34522	-0.0380969	0.0208025	-0.0172944	-0.0172944	0.491704	0.266355	33.7274	929238	337367	0.508296	0.336847
2006	161	SC Firm 161	1	US	0	SERV	5000	CSERV	1	0.444419	0.298103	0.212352	0.125219	0.225202	1.49082	14.1943	0.304829	0.000179613	2.66663	-0.0181252	-0.0149649	-0.0330901	-0.0330901	0.444419	0.298103	34.1795	763219	324147	0.555581	0.294633
2007	161	SC Firm 161	1	US	0	SERV	5000	CSERV	1	0.476214	0.563865	0.269182	0.343734	0.121728	0.844554	14.2224	0.307301	0.0731386	1.77857	0.0733249	0.0171287	0.0904536	0.0904536	0.476214	0.563865	16.92	296350	383141	0.523786	0.283288
2008	161	SC Firm 161	1	US	0	SERV	5000	CSERV	1	0.448872	0.392202	0.20184	0.166912	0.134651	1.14449	14.2548	0.293704	0.00935033	-0.291621	-0.0206271	-0.10566	-0.126287	-0.126287	0.448872	0.392202	27.46	567670	366308	0.551128	0.309502
2009	161	SC Firm 161	1	US	0	SERV	5000	CSERV	1	0.325755	0.24684	0	0	0.149236	1.3197	14.2694	0.25044	0.012034	-2.77553	-0.0983834	0.120353	0.0219695	0.0219695	0.325755	0.24684	37.49	858425	281339	0.674245	0.325755
2010	161	SC Firm 161	1	US	0	SERV	5000	CSERV	1	0.350401	0.183823	0	0	0.158321	1.90618	14.3976	0.206737	0.01016	2.53192	0.0576694	-0.0114548	0.0462146	0.0462146	0.350401	0.183823	61.74	1495235	336764	0.649599	0.350401
2011	161	SC Firm 161	1	US	0	SERV	5000	CSERV	1	0.409047	0.250173	0.053039	0.0262878	0.162864	1.63506	14.6449	0.185149	0.00743709	1.60145	0.135202	0.00754374	0.142746	0.142746	0.409047	0.250173	55	1507697	503030	0.590953	0.375948
2012	161	SC Firm 161	1	US	0	SERV	5000	CSERV	1	0.38023	0.230885	0.0580855	0.029291	0.188977	1.64684	14.7729	0.182244	0.0153976	2.32108	0.000891354	0.0183248	0.0192162	0.0192162	0.38023	0.230885	73.06	1679610	504212	0.61977	0.34201
2013	161	SC Firm 161	1	US	0	SERV	5000	CSERV	1	0.36344	0.233543	0.0355083	0.0192693	0.161129	1.5562	14.7806	0.194567	0.0187085	2.21931	0.013119	0.0201392	0.0332582	0.0332582	0.36344	0.233543	76.62	1716722	523094	0.63656	0.340005
2007	162	SC Firm 162	1	US	1	MAN	2000	IND	1	0.259253	0.122749	0.090618	0.0383125	0.0997507	2.11206	13.6209	0.112225	0.00675671	1.77857	-0.0992764	0.410394	0.311118	0.311118	0.259253	0.122749	15.23	3230312	451999	0.740747	0.208805
2008	162	SC Firm 162	1	US	1	MAN	2000	IND	1	0.497758	0.323751	0.132877	0.0689215	0.132561	1.53747	13.8555	0.102731	0.0195109	-0.291621	0.2313	-0.208	0.0232996	0.0232996	0.497758	0.323751	8.22	1763688	844359	0.502242	0.426792
2009	162	SC Firm 162	1	US	1	MAN	2000	IND	1	0.312304	0.144173	0.0588713	0.0226783	0.138018	2.16617	13.9289	0.108215	0.00988419	-2.77553	-0.170859	0.127335	-0.0435246	-0.0435246	0.312304	0.144173	14.9	3239753	545771	0.687696	0.271802
2010	162	SC Firm 162	1	US	1	MAN	2000	IND	1	0.217504	0.109247	0.0194109	0.0086586	0.132933	1.99094	14.0458	0.10413	0.000800802	2.53192	-0.0707355	0.0726976	0.00196202	0.00196202	0.217504	0.109247	15.2	3357938	411836	0.782496	0.203574
2011	162	SC Firm 162	1	US	1	MAN	2000	IND	1	0.402941	0.225607	0.199852	0.0973276	0.126521	1.78603	14.2858	0.075104	0.000179613	1.60145	0.231585	-0.0960961	0.135489	0.135489	0.402941	0.225607	14.95	3324102	968424	0.597059	0.254607
2012	162	SC Firm 162	1	US	1	MAN	2000	IND	1	0.549305	0.290567	0.388348	0.175845	0.124795	1.89046	14.4584	0.076887	0.00617981	2.32108	0.177681	0.024145	0.201826	0.201826	0.549305	0.290567	15.5	3494943	1431448	0.450695	0.26548
2013	162	SC Firm 162	1	US	1	MAN	2000	IND	1	0.5065	0.24279	0.332772	0.134806	0.135194	2.08616	14.5726	0.0644033	0.00818159	2.21931	-0.0257622	-0.0286287	-0.0543909	-0.0543909	0.5065	0.24279	18.37	4248294	1362164	0.4935	0.262033
2014	162	SC Firm 162	1	US	1	MAN	2000	IND	1	0.528974	0.259503	0.380283	0.160714	0.12408	2.03841	14.6394	0.0641508	0.00674045	2.3882	0.0322935	0.0282939	0.0605873	0.0605873	0.528974	0.259503	18.93	4139692	1450730	0.471026	0.242365
2004	163	SC Firm 163	1	US	1	MAN	3000	CGOODS	1	0.0846403	0.0244462	0	0	0.200507	3.42353	13.1336	0.158309	0.0120829	3.78574	0.000438811	0.0359043	0.0363432	0.0363432	0.0846403	0.0244462	9.255	2882627	50857	0.91536	0.0858717
2005	163	SC Firm 163	1	US	1	MAN	3000	CGOODS	1	0.0846403	0.0244462	0	0	0.173542	3.36093	13.1928	0.177783	0.019383	3.34522	0.00783724	0.0290458	0.0368831	0.0368831	0.0846403	0.0244462	9.75	3042858	58088	0.91536	0.0878452
2006	163	SC Firm 163	1	US	1	MAN	3000	CGOODS	1	0.0846403	0.0252224	0	0	0.196439	2.89708	13.2574	0.234557	0.0094407	2.66663	-0.000923533	0.0181113	0.0171878	0.0171878	0.0846403	0.0252224	7.78	2216929	57363	0.91536	0.10488
2007	163	SC Firm 163	1	US	1	MAN	3000	CGOODS	1	0.0846403	0.0258887	0	0	0.19391	2.94051	13.3908	0.228959	0.00231993	1.77857	0.0122491	0.0488808	0.0611299	0.0611299	0.0846403	0.0258887	8.885	2572284	68363	0.91536	0.101569
2008	163	SC Firm 163	1	US	1	MAN	3000	CGOODS	1	0.0846403	0.0391154	0	0	0.189625	1.65741	13.3436	0.28168	0.0107478	-0.291621	-0.0247551	-0.0271441	-0.0518992	-0.0518992	0.0846403	0.0391154	4.415	1215304	49472.3	0.91536	0.0845323
2009	163	SC Firm 163	1	US	1	MAN	3000	CGOODS	1	0.0846403	0.0244462	0	0	0.161661	3.07316	13.2077	0.240128	0.0194939	-2.77553	0.0111421	0.0563725	0.0675146	0.0675146	0.0846403	0.0244462	8.925	2469358	58637.8	0.91536	0.105366
2010	163	SC Firm 163	1	US	1	MAN	3000	CGOODS	1	0.0846403	0.0244462	0	0	0.228977	4.26676	13.6125	0.204557	0.0533411	2.53192	0.0134148	0.0904879	0.103903	0.103903	0.0846403	0.0244462	14.78	4206155	72088.6	0.91536	0.108867
2011	163	SC Firm 163	1	US	1	MAN	3000	CGOODS	1	0.0856226	0.0244462	0	0	0.23299	3.71055	13.839	0.240251	0.00443873	1.60145	0.0243242	0.0415555	0.0658797	0.0658797	0.0856226	0.0244462	14.795	4263018	100694	0.914377	0.12662
2012	163	SC Firm 163	1	US	1	MAN	3000	CGOODS	1	0.0846403	0.0315832	0	0	0.228835	2.20034	13.9104	0.27648	0.00533699	2.32108	-0.0100633	0.0292839	0.0192206	0.0192206	0.0846403	0.0315832	9.425	2696989	87957.4	0.91536	0.114349
2013	163	SC Firm 163	1	US	1	MAN	3000	CGOODS	1	0.218586	0.0743441	0.165369	0.0538253	0.208403	2.9402	13.9741	0.202383	0.0116261	2.21931	0.168726	0.0333093	0.202035	0.202035	0.218586	0.0743441	16.49	4801163	385605	0.781414	0.0926029
2014	163	SC Firm 163	1	US	1	MAN	3000	CGOODS	1	0.193596	0.0683916	0.140053	0.0474391	0.235452	2.8307	14.1343	0.184615	0.0172868	2.3882	0.00294222	0.0405335	0.0434757	0.0434757	0.193596	0.0683916	18.065	5333654	391556	0.806404	0.0917176
2004	164	SC Firm 164	1	US	1	MAN	3000	CGOODS	1	0.402938	0.188885	0.158483	0.0610198	0.165024	2.13325	16.0235	0.0851553	0.0088785	3.78574	0.0211093	0.0106461	0.0317554	0.0317554	0.402938	0.188885	44.06	7708953	1795187	0.597062	0.316459
2005	164	SC Firm 164	1	US	1	MAN	3000	CGOODS	1	0.402548	0.201754	0.149443	0.0618335	0.168378	1.99524	16.0962	0.0822156	0.0025339	3.34522	0.02632	0.000351669	0.0266717	0.0266717	0.402548	0.201754	43.92	7599596	1920774	0.597452	0.330439
2006	164	SC Firm 164	1	US	1	MAN	3000	CGOODS	1	0.432955	0.194015	0.163935	0.0582189	0.193494	2.23156	16.1629	0.0954551	0.0159258	2.66663	0.00583035	-0.099484	-0.0936537	-0.0936537	0.432955	0.194015	47.43	8088279	1946993	0.567045	0.32177
2007	164	SC Firm 164	1	US	1	MAN	3000	CGOODS	1	0.430943	0.211093	0.155438	0.0610589	0.193871	2.04148	16.199	0.0892298	0.00117845	1.77857	0.0231165	0.0239529	0.0470695	0.0470695	0.430943	0.211093	46.3	7688821	2057353	0.569057	0.326211
2008	164	SC Firm 164	1	US	1	MAN	3000	CGOODS	1	0.514383	0.2897	0.177033	0.0764936	0.18569	1.77557	16.2148	0.0884317	0.00589862	-0.291621	0.0845456	-0.0755208	0.00902483	0.00902483	0.514383	0.2897	37.86	6036493	2462018	0.485617	0.409919
2009	164	SC Firm 164	1	US	1	MAN	3000	CGOODS	1	0.476225	0.283198	0.160188	0.0765401	0.15213	1.6816	16.1238	0.0969139	0.0234009	-2.77553	-0.0157171	0.0335965	0.0178794	0.0178794	0.476225	0.283198	37.96	6032521	2383359	0.523775	0.376319
2010	164	SC Firm 164	1	US	1	MAN	3000	CGOODS	1	0.488784	0.248157	0.151799	0.0581866	0.160233	1.96966	16.2321	0.0885867	0.00694519	2.53192	0.052674	0.00187794	0.054552	0.054552	0.488784	0.248157	51.34	8093046	2671225	0.511216	0.397293
2011	164	SC Firm 164	1	US	1	MAN	3000	CGOODS	1	0.557616	0.266374	0.162951	0.0530998	0.162056	2.09336	16.3379	0.080642	0.00193642	1.60145	0.126966	-0.0299335	0.0970326	0.0970326	0.557616	0.266374	61.2	9525848	3458767	0.442384	0.471496
2012	164	SC Firm 164	1	US	1	MAN	3000	CGOODS	1	0.559592	0.278979	0.151133	0.0514279	0.164772	2.00586	16.3815	0.0832026	0.00261184	2.32108	0.051477	-0.00297691	0.0485001	0.0485001	0.559592	0.278979	63.58	9844819	3809174	0.440408	0.481181
2013	164	SC Firm 164	1	US	1	MAN	3000	CGOODS	1	0.553092	0.249286	0.187574	0.058335	0.155227	2.2187	16.4601	0.0872442	0.00886234	2.21931	0.0571245	0.0261735	0.083298	0.083298	0.553092	0.249286	83.19	12792384	4247907	0.446908	0.460757
2014	164	SC Firm 164	1	US	1	MAN	3000	CGOODS	1	0.590877	0.229946	0.19274	0.047043	0.154318	2.56963	16.5461	0.0812615	0.00102801	2.3882	0.0757441	-0.0391177	0.0366264	0.0366264	0.590877	0.229946	106.57	16317257	4872511	0.409123	0.501985
2004	165	SC Firm 165	1	US	0	SERV	4000	HCARE	1	0.132234	0.0244462	0.000221773	2.64252e-05	0.302322	7.29543	14.0966	0.103483	0.0510674	3.78574	-0.123683	0.194125	0.0704418	0.0704418	0.132234	0.0244462	8.7475	15704282	285091	0.867766	0.132041
2005	165	SC Firm 165	1	US	0	SERV	4000	HCARE	1	0.19609	0.0296526	0.0194969	0.00248498	0.304509	6.61292	14.5228	0.0644046	0.00283513	3.34522	0.120395	0.0910683	0.211464	0.211464	0.19609	0.0296526	13.1425	24167796	738538	0.80391	0.180105
2006	165	SC Firm 165	1	US	0	SERV	4000	HCARE	1	0.555623	0.070481	0.420725	0.0421871	0.397801	7.29543	14.9228	0.0884241	0.0743957	2.66663	0.364544	0.119664	0.484208	0.484208	0.555623	0.070481	16.2325	29940716	2270263	0.444377	0.232873
2007	165	SC Firm 165	1	US	0	SERV	4000	HCARE	1	0.406999	0.0524473	0.273153	0.0294157	0.388342	7.29543	15.2577	0.0767297	0.0206837	1.77857	0.0179037	0.0863502	0.104254	0.104254	0.406999	0.0524473	23.005	42903589	2374726	0.593001	0.184146
2008	165	SC Firm 165	1	US	0	SERV	4000	HCARE	1	0.384074	0.0541599	0.205284	0.0231706	0.397801	7.09148	15.4899	0.0762306	0.0118278	-0.291621	0.0417384	0.109755	0.151493	0.151493	0.384074	0.0541599	25.57	46528144	2664258	0.615926	0.224973
2009	165	SC Firm 165	1	US	0	SERV	4000	HCARE	1	0.343504	0.0788262	0.154226	0.0289582	0.392067	4.35774	15.763	0.0721726	0.0124358	-2.77553	0.0687974	0.0411952	0.109993	0.109993	0.343504	0.0788262	21.635	38932312	3331494	0.656496	0.223792
2010	165	SC Firm 165	1	US	0	SERV	4000	HCARE	1	0.494185	0.164655	0.372772	0.107066	0.379873	3.00133	15.8886	0.0604897	0.00929027	2.53192	0.206804	0.0265864	0.233391	0.233391	0.494185	0.164655	18.12	29064408	5728901	0.505815	0.19357
2011	165	SC Firm 165	1	US	0	SERV	4000	HCARE	1	0.610541	0.255244	0.530268	0.197942	0.240772	2.39199	15.942	0.0447552	0.0945173	1.60145	0.279451	0.0163032	0.295754	0.295754	0.610541	0.255244	20.465	30824629	10564278	0.389459	0.170892
2012	165	SC Firm 165	1	US	0	SERV	4000	HCARE	1	0.561542	0.176127	0.468959	0.12847	0.201903	3.18827	16.0879	0.0518017	0.0243953	2.32108	0.0641614	0.0304118	0.0945732	0.0945732	0.561542	0.176127	36.725	55791261	11927056	0.438458	0.174822
2013	165	SC Firm 165	1	US	0	SERV	4000	HCARE	1	0.492759	0.0880497	0.366853	0.0544512	0.21563	5.59637	16.2316	0.0516409	0.00817325	2.21931	-0.0354779	-0.0115611	-0.047039	-0.047039	0.492759	0.0880497	75.1	115234491	11126000	0.507241	0.202533
2014	165	SC Firm 165	1	US	0	SERV	4000	HCARE	1	0.553514	0.119558	0.444891	0.0807028	0.397801	4.62967	17.03	0.0482922	0.129833	2.3882	0.232547	-0.0750635	0.157483	0.157483	0.553514	0.119558	94.26	141295740	19187000	0.446486	0.19715
2004	166	SC Firm 166	1	US	1	MAN	2000	IND	1	0.349368	0.0479873	0.024291	0.00233156	0.397801	7.28043	13.313	0.254255	0.0780358	3.78574	-0.238487	0.117012	-0.121475	-0.121475	0.349368	0.0479873	37.35	2576374	129865	0.650632	0.362795
2005	166	SC Firm 166	1	US	1	MAN	2000	IND	1	0.330068	0.0556761	0.0271163	0.0033243	0.397801	5.92835	13.5031	0.238983	0.00409658	3.34522	0.0386487	0.0156183	0.054267	0.054267	0.330068	0.0556761	36.48	2494763	147088	0.669932	0.335761
2006	166	SC Firm 166	1	US	1	MAN	2000	IND	1	0.324226	0.058974	0.0504352	0.00689	0.397801	5.49778	13.6127	0.2434	0.0091804	2.66663	0.0367218	0.0410279	0.0777497	0.0777497	0.324226	0.058974	39.62	2646805	165875	0.675774	0.317113
2007	166	SC Firm 166	1	US	1	MAN	2000	IND	1	0.519776	0.107063	0.32843	0.0513907	0.397801	4.85487	13.6427	0.261948	0.00608151	1.77857	0.210725	0.0330449	0.24377	0.24377	0.519776	0.107063	37.26	2326747	278976	0.480224	0.309282
2008	166	SC Firm 166	1	US	1	MAN	2000	IND	1	0.710901	0.235854	0.541915	0.129289	0.389351	3.01416	13.6137	0.258263	0.0692594	-0.291621	0.229784	-0.113086	0.116697	0.116697	0.710901	0.235854	23.73	1335544	412216	0.289099	0.368897
2009	166	SC Firm 166	1	US	1	MAN	2000	IND	1	0.559952	0.129232	0.319177	0.0518434	0.227664	4.33293	13.2694	0.291862	0.1265	-2.77553	-0.250069	0.0825802	-0.167489	-0.167489	0.559952	0.129232	28.57	1797575	266780	0.440048	0.353652
2010	166	SC Firm 166	1	US	1	MAN	2000	IND	1	0.502117	0.101076	0.228981	0.0320504	0.350896	4.96773	13.5199	0.252953	0.0936113	2.53192	-0.000791745	0.0398606	0.0390688	0.0390688	0.502117	0.101076	39.45	2368892	266360	0.497883	0.354253
2011	166	SC Firm 166	1	US	1	MAN	2000	IND	1	0.630863	0.184186	0.488849	0.112169	0.29625	3.42515	13.7049	0.158123	0.0201282	1.60145	0.326211	0.00639934	0.33261	0.33261	0.630863	0.184186	40.89	2443069	551569	0.369137	0.277832
2012	166	SC Firm 166	1	US	1	MAN	2000	IND	1	0.640015	0.214925	0.54268	0.154493	0.199313	2.97785	13.8279	0.114655	0.0638057	2.32108	0.222708	0.0463285	0.269037	0.269037	0.640015	0.214925	51.49	3089994	845930	0.359985	0.22925
2013	166	SC Firm 166	1	US	1	MAN	2000	IND	1	0.506264	0.12399	0.389427	0.0809169	0.238908	4.08309	13.9145	0.114311	0.0288538	2.21931	-0.131102	0.0724367	-0.0586651	-0.0586651	0.506264	0.12399	78.12	4747269	671928	0.493736	0.20713
2014	166	SC Firm 166	1	US	1	MAN	2000	IND	1	0.599628	0.161183	0.500618	0.113962	0.22309	3.72016	14.0153	0.104371	0.00764508	2.3882	0.164661	-0.0110216	0.153639	0.153639	0.599628	0.161183	80.18	4820536	926292	0.400372	0.212801
2008	167	SC Firm 167	1	US	0	SERV	5000	CSERV	1	0.541927	0.0691207	0.376244	0.0364776	0.152936	7.29543	11.9911	0.353868	0.0426577	-0.291621	-0.250069	0.410394	0.160325	0.160325	0.541927	0.0691207	18.78	853836	63400	0.458073	0.265621
2009	167	SC Firm 167	1	US	0	SERV	5000	CSERV	1	0.507674	0.0927281	0.253242	0.0325192	0.347497	5.47487	12.4757	0.385549	0.129833	-2.77553	0.144845	0.0293811	0.174227	0.174227	0.507674	0.0927281	19.01	867958	88710	0.492326	0.340716
2010	167	SC Firm 167	1	US	0	SERV	5000	CSERV	1	0.536522	0.141367	0.167922	0.0279021	0.287736	3.79523	12.8626	0.450748	0.0422493	2.53192	0.214053	0.0227811	0.236834	0.236834	0.536522	0.141367	19.59	896458	147595	0.463478	0.442987
2011	167	SC Firm 167	1	US	0	SERV	5000	CSERV	1	0.469471	0.174278	0.119032	0.0312204	0.314541	2.6938	12.9639	0.597605	0.0103	1.60145	0.00511252	-0.0296369	-0.0245244	-0.0245244	0.469471	0.174278	15.96	706996	149220	0.530529	0.414571
2012	167	SC Firm 167	1	US	0	SERV	5000	CSERV	1	0.512845	0.19475	0.293942	0.0872932	0.27474	2.63335	13.1446	0.543846	0.0215707	2.32108	0.211344	0.00612216	0.217466	0.217466	0.512845	0.19475	23.47	1049485	253819	0.487155	0.324271
2013	167	SC Firm 167	1	US	0	SERV	5000	CSERV	1	0.421075	0.114436	0.208024	0.0445859	0.27384	3.67957	13.3019	0.551203	0.00149145	2.21931	0.00909755	0.0435984	0.052696	0.052696	0.421075	0.114436	43.6	2007562	259424	0.578925	0.288216
2014	167	SC Firm 167	1	US	0	SERV	5000	CSERV	1	0.348687	0.107792	0.150191	0.0383543	0.278264	3.2348	13.446	0.63274	0.00474536	2.3882	0.00540284	0.0318428	0.0372456	0.0372456	0.348687	0.107792	46.66	2181075	263507	0.651313	0.254714
2004	168	SC Firm 168	1	US	0	SERV	5000	CSERV	1	0.480144	0.268713	0.199076	0.0899883	0.21429	1.78683	13.4998	0.268543	0.0475806	3.78574	0.0559599	0.0193941	0.075354	0.075354	0.480144	0.268713	6.275	554431	203727	0.519856	0.35093
2005	168	SC Firm 168	1	US	0	SERV	5000	CSERV	1	0.54483	0.17733	0.234369	0.0522452	0.215432	3.0724	13.7495	0.227365	0.0212007	3.34522	0.223176	0.0140565	0.237233	0.237233	0.54483	0.17733	17.8	1600900	345081	0.45517	0.405497
2006	168	SC Firm 168	1	US	0	SERV	5000	CSERV	1	0.484948	0.122011	0.108339	0.017617	0.276102	3.97463	13.9854	0.196268	0.0494206	2.66663	0.0726278	0.0234179	0.0960456	0.0960456	0.484948	0.122011	31.715	2920599	405865	0.515052	0.422368
2007	168	SC Firm 168	1	US	0	SERV	5000	CSERV	1	0.446165	0.262679	0.0759236	0.0350607	0.30371	1.69852	14.3751	0.193822	0.129833	1.77857	0.105086	0.0489813	0.154067	0.154067	0.446165	0.262679	15.35	1485580	529254	0.553835	0.400662
2008	168	SC Firm 168	1	US	0	SERV	5000	CSERV	1	0.379896	0.113943	0.047565	0.0103741	0.332374	3.33407	14.5543	0.177621	0.0157623	-0.291621	-0.0446739	-0.0477191	-0.092393	-0.092393	0.379896	0.113943	42.3	3682577	473565	0.620104	0.348927
2009	168	SC Firm 168	1	US	0	SERV	5000	CSERV	1	0.333739	0.116262	0.01591	0.00422813	0.279444	2.87057	14.5709	0.166732	0.0324978	-2.77553	0.0244722	0.0300715	0.0545437	0.0545437	0.333739	0.116262	47.32	3884517	511038	0.666261	0.322968
2010	168	SC Firm 168	1	US	0	SERV	5000	CSERV	1	0.374259	0.19392	0.0134624	0.00545884	0.283509	1.92996	14.7267	0.186176	0.00429351	2.53192	0.0711174	-0.00371573	0.0674017	0.0674017	0.374259	0.19392	29.82	2622613	630928	0.625741	0.36572
2011	168	SC Firm 168	1	US	0	SERV	5000	CSERV	1	0.362621	0.226474	0.0103008	0.00532768	0.269576	1.60116	14.8043	0.189151	0.0119397	1.60145	0.0205571	-0.0403811	-0.0198241	-0.0198241	0.362621	0.226474	24.54	2284447	668845	0.637379	0.355987
2012	168	SC Firm 168	1	US	0	SERV	5000	CSERV	1	0.365633	0.208164	0.00931	0.00426797	0.21256	1.75646	14.7933	0.207603	0.0469362	2.32108	-0.0247043	-0.0559811	-0.0806854	-0.0806854	0.365633	0.208164	31.07	2383194	626514	0.634367	0.359671
2013	168	SC Firm 168	1	US	0	SERV	5000	CSERV	1	0.345673	0.275695	0.0100664	0.00727336	0.183287	1.25382	14.7593	0.183972	0.019098	2.21931	-0.00940643	-0.00945121	-0.0188576	-0.0188576	0.345673	0.275695	21.08	1602369	609917	0.654327	0.33902
2004	169	SC Firm 169	1	US	1	MAN	1	OILGAS	1	0.371759	0.304102	0.0648369	0.0487065	0.145592	1.22248	11.3336	0.80206	0.0424854	3.78574	0.0412156	0.149008	0.190224	0.190224	0.371759	0.304102	3.3	66484	29053	0.628241	0.148804
2005	169	SC Firm 169	1	US	1	MAN	1	OILGAS	1	0.245868	0.066229	0.107906	0.0256393	0.127043	3.71239	11.3336	0.823896	0.00140659	3.34522	-0.013951	0.217627	0.203676	0.203676	0.245868	0.066229	12.05	387627	27493	0.754132	0.15465
2006	169	SC Firm 169	1	US	1	MAN	1	OILGAS	1	0.365573	0.134919	0.233381	0.0761239	0.197319	2.70958	11.3336	0.807959	0.0341331	2.66663	0.224693	0.0598203	0.284513	0.284513	0.365573	0.134919	13.59	457436	71342	0.634427	0.172436
2007	169	SC Firm 169	1	US	1	MAN	1	OILGAS	1	0.274409	0.129199	0.179501	0.0790427	0.168494	2.12393	11.5742	0.863916	0.0246129	1.77857	0.104197	0.340075	0.444272	0.444272	0.274409	0.129199	18.26	775202	115015	0.725591	0.115671
2008	169	SC Firm 169	1	US	1	MAN	1	OILGAS	1	0.485737	0.3902	0.382677	0.295753	0.397801	1.24484	11.8627	0.731225	0.100889	-0.291621	-0.0326448	-0.0248746	-0.0575194	-0.0575194	0.485737	0.3902	3.95	168425	107772	0.514263	0.166947
2009	169	SC Firm 169	1	US	1	MAN	1	OILGAS	1	0.449948	0.173036	0.295404	0.0968554	0.238762	2.60032	11.3617	0.713087	0.0920274	-2.77553	-0.0241	-0.0557613	-0.0798614	-0.0798614	0.449948	0.173036	11.45	488874	102293	0.550052	0.219337
2010	169	SC Firm 169	1	US	1	MAN	1	OILGAS	1	0.339817	0.100912	0.197423	0.0509075	0.28046	3.36745	11.7592	0.757386	0.0343277	2.53192	0.019844	0.120872	0.140716	0.140716	0.339817	0.100912	21.68	967913	108637	0.660183	0.17742
2011	169	SC Firm 169	1	US	1	MAN	1	OILGAS	1	0.0850862	0.034657	0.00359735	0.00139179	0.250715	2.45509	12.3426	0.678045	0.00126529	1.60145	-0.0720949	0.410394	0.338299	0.338299	0.0850862	0.034657	29.45	1638049	58808	0.914914	0.081783
2012	169	SC Firm 169	1	US	1	MAN	1	OILGAS	1	0.274558	0.143768	0.207082	0.103835	0.114493	1.90973	12.4249	0.604338	0.0732212	2.32108	0.237299	0.281489	0.518788	0.518788	0.274558	0.143768	38.22	2580897	433353	0.725442	0.0968862
2013	169	SC Firm 169	1	US	1	MAN	1	OILGAS	1	0.196285	0.0895079	0.121438	0.0527068	0.0649247	2.19294	12.479	0.632568	0.0256076	2.21931	0.0353751	0.321672	0.357047	0.357047	0.196285	0.0895079	63.13	5377258	528623	0.803715	0.127625
2014	169	SC Firm 169	1	US	1	MAN	1	OILGAS	1	0.311889	0.240625	0.222789	0.166945	0.135324	1.29616	13.4169	0.795789	0.0293224	2.3882	0.166358	0.0241095	0.190468	0.190468	0.311889	0.240625	41.74	3575258	1132902	0.688111	0.17058
2004	170	SC Firm 170	1	US	0	SERV	4000	HCARE	1	0.24077	0.0940953	0.114328	0.0405649	0.181584	2.55879	12.8574	0.148233	0.00776508	3.78574	-0.0285212	0.346817	0.318296	0.318296	0.24077	0.0940953	24.43	1084271	112622	0.75923	0.142764
2005	170	SC Firm 170	1	US	0	SERV	4000	HCARE	1	0.192303	0.071501	0.0816169	0.027941	0.173961	2.68951	12.9474	0.137987	0.00347139	3.34522	-0.0141698	0.0319714	0.0178016	0.0178016	0.192303	0.071501	22.51	1362121	104893	0.807697	0.120523
2006	170	SC Firm 170	1	US	0	SERV	4000	HCARE	1	0.16253	0.0698455	0.0567838	0.0227631	0.162934	2.327	13.0161	0.158494	0.011692	2.66663	-0.0206133	0.0437846	0.0231712	0.0231712	0.16253	0.0698455	31.51	1239669	93087	0.83747	0.112113
2007	170	SC Firm 170	1	US	0	SERV	4000	HCARE	1	0.183117	0.0688416	0.0242505	0.0081301	0.166823	2.65998	13.1547	0.191287	0.000179613	1.77857	0.0302521	0.0515034	0.0817555	0.0817555	0.183117	0.0688416	28.25	1508283	111509	0.816883	0.168157
2008	170	SC Firm 170	1	US	0	SERV	4000	HCARE	1	0.164201	0.07066	0.0109972	0.00428493	0.187884	2.32381	13.3011	0.212111	0.011512	-0.291621	-0.00743274	0.058877	0.0514443	0.0514443	0.164201	0.07066	27.575	1403085	106680	0.835799	0.159723
2009	170	SC Firm 170	1	US	0	SERV	4000	HCARE	1	0.200317	0.0959066	0.0326221	0.0140797	0.198011	2.08867	13.3777	0.202796	0.00670833	-2.77553	0.06012	0.0530444	0.113164	0.113164	0.200317	0.0959066	31.59	1436900	152427	0.799683	0.193558
2010	170	SC Firm 170	1	US	0	SERV	4000	HCARE	1	0.154164	0.0699412	0.00687489	0.00284807	0.198139	2.20419	13.425	0.186649	0.000587378	2.53192	-0.028764	0.0687837	0.0400197	0.0400197	0.154164	0.0699412	30.61	1708212	128459	0.845836	0.170713
2011	170	SC Firm 170	1	US	0	SERV	4000	HCARE	1	0.170306	0.0808943	0.00496358	0.00213436	0.168411	2.1053	13.4978	0.177424	0.0189424	1.60145	0.0293184	0.0263463	0.0556646	0.0556646	0.170306	0.0808943	40.84	1763036	155172	0.829694	0.191775
2012	170	SC Firm 170	1	US	0	SERV	4000	HCARE	1	0.453639	0.237772	0.375417	0.184222	0.0863141	1.90788	13.7012	0.175764	0.0509553	2.32108	0.347496	0.0310243	0.378521	0.378521	0.453639	0.237772	42.13	2125975	663183	0.546361	0.145454
2013	170	SC Firm 170	1	US	0	SERV	4000	HCARE	1	0.427048	0.278998	0.335331	0.20756	0.0858175	1.53065	13.752	0.179264	0.00686959	2.21931	-0.0109346	0.0222365	0.0113018	0.0113018	0.427048	0.278998	37.42	1671043	646626	0.572952	0.157579
2014	170	SC Firm 170	1	US	0	SERV	4000	HCARE	1	0.422237	0.215416	0.332702	0.157762	0.12732	1.9601	13.7216	0.216739	0.02656	2.3882	-0.0130792	0.00245655	-0.0106226	-0.0106226	0.422237	0.215416	32.24	2284374	627198	0.577763	0.155784
2004	171	SC Firm 171	1	US	1	MAN	3000	CGOODS	1	0.25234	0.207679	0.178476	0.144364	0.081319	1.21505	13.2068	0.127153	0.00818418	3.78574	0.0684272	0.0421714	0.110599	0.110599	0.25234	0.207679	10.335	658715	172659	0.74766	0.111552
2005	171	SC Firm 171	1	US	1	MAN	3000	CGOODS	1	0.229267	0.185049	0.148517	0.117498	0.0769003	1.23896	13.3374	0.124734	0.00687251	3.34522	-0.0148995	0.0163632	0.00146365	0.00146365	0.229267	0.185049	10.58	713987	162123	0.770733	0.118484
2006	171	SC Firm 171	1	US	1	MAN	3000	CGOODS	1	0.27766	0.196343	0.193689	0.132455	0.0884213	1.41416	13.5125	0.13653	0.0118739	2.66663	0.0929435	0.0724726	0.165416	0.165416	0.27766	0.196343	15.605	997489	243698	0.72234	0.122251
2007	171	SC Firm 171	1	US	1	MAN	3000	CGOODS	1	0.320531	0.238008	0.230979	0.165883	0.0941645	1.34672	13.7106	0.108555	0.00368803	1.77857	0.0902919	0.0405081	0.1308	0.1308	0.320531	0.238008	16	1086181	339268	0.679469	0.137453
2008	171	SC Firm 171	1	US	1	MAN	3000	CGOODS	1	0.389118	0.34197	0.286184	0.246476	0.0798835	1.13787	13.8611	0.126323	0.0108333	-0.291621	0.119726	0.00698516	0.126711	0.126711	0.389118	0.34197	9.545	942968	490049	0.610882	0.165264
2009	171	SC Firm 171	1	US	1	MAN	3000	CGOODS	1	0.353858	0.384914	0.262523	0.289151	0.0618186	0.919316	13.9313	0.0909082	0.0149954	-2.77553	-0.0823243	-0.0166213	-0.0989456	-0.0989456	0.353858	0.384914	8.505	635290	397558	0.646142	0.145757
2010	171	SC Firm 171	1	US	1	MAN	3000	CGOODS	1	0.328925	0.314561	0.21869	0.207649	0.0826785	1.04567	13.699	0.0892965	0.018856	2.53192	-0.00290213	0.0412733	0.0383712	0.0383712	0.328925	0.314561	13.53	858717	394081	0.671075	0.173044
2011	171	SC Firm 171	1	US	1	MAN	3000	CGOODS	1	0.31112	0.220751	0.20036	0.13582	0.1015	1.40937	13.9186	0.0828067	0.00985093	1.60145	0.0155973	0.0447213	0.0603185	0.0603185	0.31112	0.220751	18.33	1464520	414880	0.68888	0.177448
2012	171	SC Firm 171	1	US	1	MAN	3000	CGOODS	1	0.359322	0.195527	0.267008	0.136339	0.104765	1.83771	14.1363	0.0887163	0.0022314	2.32108	0.111424	0.0444469	0.155871	0.155871	0.359322	0.195527	27.11	2474219	601358	0.640678	0.190254
2013	171	SC Firm 171	1	US	1	MAN	3000	CGOODS	1	0.417333	0.233136	0.336013	0.176817	0.100958	1.79008	14.3663	0.104424	0.00237605	2.21931	0.151068	0.0571438	0.208212	0.208212	0.417333	0.233136	45.39	3100342	942544	0.582667	0.173123
2014	171	SC Firm 171	1	US	1	MAN	3000	CGOODS	1	0.403671	0.212052	0.329229	0.163272	0.0972392	1.90364	14.5827	0.104765	0.00153191	2.3882	0.0858144	0.105387	0.191201	0.191201	0.403671	0.212052	58.29	4447889	1197011	0.596329	0.161037
2004	172	SC Firm 172	1	US	1	MAN	1	OILGAS	1	0.752143	0.407568	0.501458	0.185689	0.0803076	1.84544	16.8051	0.16093	0.00339428	3.78574	-0.0642965	0.162948	0.098651	0.098651	0.752143	0.407568	19.62	17344080	11932000	0.247857	0.502837
2005	172	SC Firm 172	1	US	1	MAN	1	OILGAS	1	0.576555	0.214098	0.332495	0.0906302	0.166866	2.69295	16.128	0.17597	0.0628422	3.34522	-0.216374	0.0223285	-0.194046	-0.194046	0.576555	0.214098	30.98	31847440	8676000	0.423445	0.36563
2006	172	SC Firm 172	1	US	1	MAN	1	OILGAS	1	0.562515	0.234335	0.275798	0.0831141	0.217497	2.40047	16.377	0.151661	0.0367219	2.66663	0.0479241	-0.0635824	-0.0156584	-0.0156584	0.562515	0.234335	31.05	30987900	9484000	0.437485	0.395907
2007	172	SC Firm 172	1	US	1	MAN	1	OILGAS	1	0.477274	0.158189	0.288645	0.0770746	0.306738	3.01711	16.541	0.276361	0.0518488	1.77857	-0.244766	-0.208	-0.452766	-0.452766	0.477274	0.158189	37.91	33360800	6269000	0.522726	0.265169
2008	172	SC Firm 172	1	US	1	MAN	1	OILGAS	1	0.462982	0.290435	0.252685	0.138325	0.325756	1.5941	16.7213	0.33243	0.00855604	-0.291621	0.0271811	-0.0681265	-0.0409454	-0.0409454	0.462982	0.290435	18.18	16271100	6660000	0.537018	0.281404
2009	172	SC Firm 172	1	US	1	MAN	1	OILGAS	1	0.472246	0.223455	0.343858	0.144221	0.182186	2.11339	16.5017	0.348228	0.105048	-2.77553	0.0695368	0.0109445	0.0804813	0.0804813	0.472246	0.223455	30.09	27141180	7810000	0.527754	0.195671
2010	172	SC Firm 172	1	US	1	MAN	1	OILGAS	1	0.433076	0.175779	0.269353	0.0933154	0.228343	2.46375	16.7044	0.373941	0.0291993	2.53192	0.00623053	0.00748757	0.0137181	0.0137181	0.433076	0.175779	40.83	37155300	7924000	0.566924	0.22408
2011	172	SC Firm 172	1	US	1	MAN	1	OILGAS	1	0.442581	0.247949	0.26751	0.131681	0.258943	1.78497	17.0275	0.35866	0.0242961	1.60145	0.107911	0.0133463	0.121257	0.121257	0.442581	0.247949	34.51	31783710	10479000	0.557419	0.239008
2012	172	SC Firm 172	1	US	1	MAN	1	OILGAS	1	0.424845	0.265431	0.234151	0.130105	0.212149	1.60058	17.1655	0.374206	0.0345007	2.32108	0.0425392	0.009668	0.0522072	0.0522072	0.424845	0.265431	34.69	32227010	11645000	0.575155	0.248997
2013	172	SC Firm 172	1	US	1	MAN	1	OILGAS	1	0.535263	0.266343	0.365285	0.153548	0.211648	2.00968	17.1966	0.387435	0.00432989	2.21931	0.136776	-0.13154	0.0052356	0.0052356	0.535263	0.266343	50.75	43086750	15642000	0.464737	0.267803
2014	172	SC Firm 172	1	US	1	MAN	1	OILGAS	1	0.49544	0.323833	0.325217	0.190329	0.21799	1.52993	17.3081	0.386942	0.00382974	2.3882	0.0102667	-0.00871588	0.00155087	0.00155087	0.49544	0.323833	39.33	33351840	15973000	0.50456	0.252264
2004	173	SC Firm 173	1	US	1	MAN	3000	CGOODS	1	0.56004	0.156259	0.310984	0.0616193	0.181263	3.58406	14.813	0.218267	0.0212035	3.78574	0.033156	0.0324903	0.0656463	0.0656463	0.56004	0.156259	127	6014192	1113814	0.43996	0.361467
2005	173	SC Firm 173	1	US	1	MAN	3000	CGOODS	1	0.514929	0.171949	0.23939	0.057996	0.214724	2.99466	14.9244	0.224771	0.0229964	3.34522	0.00568809	-0.0199076	-0.0142195	-0.0142195	0.514929	0.171949	97.85	5423665	1126255	0.485071	0.362261
2006	173	SC Firm 173	1	US	1	MAN	3000	CGOODS	1	0.483042	0.169073	0.138565	0.0338422	0.221904	2.857	14.9935	0.219693	0.0047632	2.66663	0.00897947	-0.0356763	-0.0266968	-0.0266968	0.483042	0.169073	99.91	5639946	1147588	0.516958	0.399888
2007	173	SC Firm 173	1	US	1	MAN	3000	CGOODS	1	0.404496	0.117529	0.0487263	0.00994331	0.204694	3.44168	15.0828	0.235953	0.00933234	1.77857	-0.0529167	-0.0178662	-0.0707829	-0.0707829	0.404496	0.117529	73.71	7619904	1014827	0.595504	0.373993
2008	173	SC Firm 173	1	US	1	MAN	3000	CGOODS	1	0.526041	0.380411	0.242082	0.150158	0.118436	1.38282	15.2197	0.226409	0.062309	-0.291621	0.167055	-0.0941461	0.0729089	0.0729089	0.526041	0.380411	16.73	2422063	1487079	0.473959	0.374657
2009	173	SC Firm 173	1	US	1	MAN	3000	CGOODS	1	0.592831	0.529419	0.364356	0.306959	0.023981	1.11978	14.8645	0.207733	0.0713107	-2.77553	-0.00837438	0.0432829	0.0349085	0.0349085	0.592831	0.529419	35.28	1303400	1466365	0.407169	0.359438
2004	174	SC Firm 174	1	US	1	MAN	9000	TECH	1	0.424207	0.222401	0.242956	0.110785	0.120406	1.9074	14.7392	0.12728	0.0312949	3.78574	0.0234073	0.0162189	0.0396262	0.0396262	0.424207	0.222401	29.1889	3301292	944200	0.575793	0.240678
2005	174	SC Firm 174	1	US	1	MAN	9000	TECH	1	0.403516	0.190431	0.216736	0.0877708	0.162774	2.11896	14.9143	0.125254	0.0259322	3.34522	0.0192887	0.0236429	0.0429316	0.0429316	0.403516	0.190431	40.6349	4215529	991600	0.596484	0.249329
2006	174	SC Firm 174	1	US	1	MAN	9000	TECH	1	0.461955	0.208387	0.293127	0.1128	0.159437	2.21682	15.061	0.125195	0.000904928	2.66663	0.14639	0.0209401	0.16733	0.16733	0.461955	0.208387	43.3275	5514302	1451600	0.538045	0.247939
2007	174	SC Firm 174	1	US	1	MAN	9000	TECH	1	0.553881	0.256645	0.364767	0.137694	0.151634	2.15816	15.134	0.104222	0.00142152	1.77857	0.224421	0.0125284	0.23695	0.23695	0.553881	0.256645	59.2186	7068464	2440400	0.446119	0.311734
2008	174	SC Firm 174	1	US	1	MAN	9000	TECH	1	0.499406	0.252614	0.263551	0.108135	0.180789	1.97695	15.3407	0.0879957	0.0174774	-0.291621	-0.0279633	0.0351378	0.0071745	0.0071745	0.499406	0.252614	35.9488	6837357	2311000	0.500594	0.329444
2009	174	SC Firm 174	1	US	1	MAN	9000	TECH	1	0.581398	0.408697	0.407162	0.254723	0.208349	1.42256	15.4259	0.121655	0.0180861	-2.77553	0.0638284	-0.0245011	0.0393272	0.0393272	0.581398	0.408697	47.55	3755888	2596000	0.418602	0.293902
2010	174	SC Firm 174	1	US	1	MAN	9000	TECH	1	0.53841	0.327318	0.355412	0.187001	0.22953	1.64491	15.3684	0.128531	0.0157871	2.53192	-0.00885403	0.00461675	-0.00423729	-0.00423729	0.53841	0.327318	45.3	5248815	2554000	0.46159	0.283898
2004	175	SC Firm 175	1	US	1	MAN	3000	CGOODS	1	0.494015	0.319956	0.282241	0.159305	0.135525	1.54401	14.9133	0.0638555	0.013097	3.78574	-0.0485086	0.024985	-0.0235236	-0.0235236	0.494015	0.319956	19.38	3402680	1600936	0.505985	0.295049
2005	175	SC Firm 175	1	US	1	MAN	3000	CGOODS	1	0.477915	0.303355	0.239601	0.130353	0.148631	1.57543	14.9429	0.0496934	0.00257904	3.34522	-0.00704877	-0.0194012	-0.0264499	-0.0264499	0.477915	0.303355	20.18	3623055	1577667	0.522085	0.313407
2006	175	SC Firm 175	1	US	1	MAN	3000	CGOODS	1	0.503411	0.262641	0.247383	0.103535	0.168901	1.91673	14.9634	0.0586799	0.01942	2.66663	-0.00602279	-0.108795	-0.114818	-0.114818	0.503411	0.262641	27.25	4376906	1559015	0.496589	0.340184
2007	175	SC Firm 175	1	US	1	MAN	3000	CGOODS	1	0.572115	0.329868	0.381756	0.185221	0.208791	1.73438	15.1603	0.058065	0.0275134	1.77857	0.0905006	-0.121719	-0.0312181	-0.0312181	0.572115	0.329868	25.58	3762314	1851971	0.427885	0.307902
2008	175	SC Firm 175	1	US	1	MAN	3000	CGOODS	1	0.5611	0.305435	0.340264	0.150678	0.208418	1.83705	15.2072	0.0668099	0.0031467	-0.291621	-0.0233401	-0.0597687	-0.0831088	-0.0831088	0.5611	0.305435	29.17	4043222	1778011	0.4389	0.334733
2009	175	SC Firm 175	1	US	1	MAN	3000	CGOODS	1	0.590758	0.342958	0.418154	0.206264	0.197481	1.72254	15.2186	0.0566364	0.00349707	-2.77553	0.134494	-0.0153746	0.11912	0.11912	0.590758	0.342958	32.06	4410426	2302120	0.409242	0.296649
2010	175	SC Firm 175	1	US	1	MAN	3000	CGOODS	1	0.605343	0.27094	0.466448	0.17479	0.179367	2.23424	15.2023	0.057065	0.00525055	2.53192	0.0429212	-0.0579299	-0.0150087	-0.0150087	0.605343	0.27094	47.18	6667430	2477806	0.394657	0.260322
2011	175	SC Firm 175	1	US	1	MAN	3000	CGOODS	1	0.65684	0.394092	0.527309	0.274871	0.182641	1.66672	15.2708	0.0527797	0.000179613	1.60145	0.0569997	-0.102888	-0.0458885	-0.0458885	0.65684	0.394092	31.89	4171577	2713259	0.34316	0.27403
2005	176	SC Firm 176	1	US	1	MAN	1000	BMAT	1	0.454454	0.351063	0.195507	0.136308	0.115564	1.29451	14.1004	0.255413	0.0135905	3.34522	-0.0475994	-0.020389	-0.0679884	-0.0679884	0.454454	0.351063	16.035	930410	503334	0.545546	0.33735
2006	176	SC Firm 176	1	US	1	MAN	1000	BMAT	1	0.467613	0.308064	0.247399	0.142829	0.105651	1.51791	14.142	0.194016	0.00230922	2.66663	0.127171	0.0629015	0.190072	0.190072	0.467613	0.308064	25.82	1552832	691352	0.532387	0.298912
2007	176	SC Firm 176	1	US	1	MAN	1000	BMAT	1	0.403497	0.274869	0.174953	0.106209	0.141556	1.46796	14.1522	0.203601	0.0216248	1.77857	-0.103136	-0.0437585	-0.146894	-0.146894	0.403497	0.274869	22.45	1452569	550613	0.596503	0.287997
2008	176	SC Firm 176	1	US	1	MAN	1000	BMAT	1	0.49852	0.385452	0.306921	0.218384	0.144016	1.29334	14.1459	0.233748	0.00235901	-0.291621	-0.0106804	-0.0989191	-0.109599	-0.109599	0.49852	0.385452	16.11	859461	539064	0.50148	0.2826
2009	176	SC Firm 176	1	US	1	MAN	1000	BMAT	1	0.457776	0.338967	0.263999	0.17889	0.13986	1.3505	14.0263	0.23018	0.00278415	-2.77553	-0.0320843	-0.0146214	-0.0467057	-0.0467057	0.457776	0.338967	22.75	982397	503757	0.542224	0.268131
2010	176	SC Firm 176	1	US	1	MAN	1000	BMAT	1	0.445519	0.331452	0.281617	0.194773	0.115677	1.34414	14.0441	0.217672	0.0108527	2.53192	0.0087823	-0.0123654	-0.00358314	-0.00358314	0.445519	0.331452	20.52	1036523	513887	0.554481	0.234774
2011	176	SC Firm 176	1	US	1	MAN	1000	BMAT	1	0.418642	0.317235	0.245547	0.173552	0.127075	1.31966	14.183	0.197593	0.00935928	1.60145	6.84201e-05	-0.000183268	-0.000114848	-0.000114848	0.418642	0.317235	23.11	1106187	513971	0.581358	0.236383
2004	177	SC Firm 177	1	US	0	SERV	4000	HCARE	1	0.212645	0.0886459	0	0	0.145241	2.39881	13.0003	0.0287727	0.0230253	3.78574	-0.00973863	0.00096428	-0.00877435	-0.00877435	0.212645	0.0886459	6.17482	365011	35504	0.787355	0.212645
2005	177	SC Firm 177	1	US	0	SERV	4000	HCARE	1	0.213697	0.0670335	0	0	0.156414	3.18792	13.0526	0.0251765	0.00880765	3.34522	0.0252773	0.0301597	0.055437	0.055437	0.213697	0.0670335	9.20445	560433	40267	0.786303	0.213697
2006	177	SC Firm 177	1	US	0	SERV	4000	HCARE	1	0.232325	0.059198	0	0	0.176864	3.92454	13.1454	0.0226159	0.0139207	2.66663	0.0455195	0.0247963	0.0703158	0.0703158	0.232325	0.059198	12.8711	795879	50079	0.767675	0.232325
2007	177	SC Firm 177	1	US	0	SERV	4000	HCARE	1	0.199903	0.0511657	0	0	0.19344	3.90698	13.2668	0.017681	0.0105574	1.77857	-0.00587177	0.0714926	0.0656208	0.0656208	0.199903	0.0511657	14.12	902183	48650	0.800097	0.199903
2008	177	SC Firm 177	1	US	0	SERV	4000	HCARE	1	0.188602	0.0637375	0	0	0.180149	2.95904	13.3092	0.015807	0.00878313	-0.291621	-0.00712501	0.0214555	0.0143305	0.0143305	0.188602	0.0637375	10.62	688622	46879	0.811398	0.188602
2009	177	SC Firm 177	1	US	0	SERV	4000	HCARE	1	0.214817	0.0575574	0	0	0.180299	3.73221	13.4483	0.0165142	0.000367804	-2.77553	0.0385081	0.0338333	0.0723414	0.0723414	0.214817	0.0575574	14.3067	935248	57118	0.785183	0.214817
2010	177	SC Firm 177	1	US	0	SERV	4000	HCARE	1	0.233347	0.0568137	0	0	0.198828	4.10723	13.5593	0.0239481	0.0121129	2.53192	0.0278375	0.0329179	0.0607554	0.0607554	0.233347	0.0568137	16.27	1076684	64855	0.766653	0.233347
2011	177	SC Firm 177	1	US	0	SERV	4000	HCARE	1	0.24843	0.057416	0	0	0.211215	4.32685	13.6979	0.033701	0.00762737	1.60145	0.0245569	0.0300972	0.054654	0.054654	0.24843	0.057416	17.69	1181497	71969	0.75157	0.24843
2012	177	SC Firm 177	1	US	0	SERV	4000	HCARE	1	0.306818	0.0603946	0	0	0.218791	5.08022	13.8901	0.0310161	0.00514211	2.32108	0.0895094	0.0353973	0.124907	0.124907	0.306818	0.0603946	23.23	1580871	101613	0.693182	0.306818
2013	177	SC Firm 177	1	US	0	SERV	4000	HCARE	1	0.329615	0.065963	0	0	0.162204	4.99696	13.9552	0.0265763	0.0394043	2.21931	0.0907176	0.129663	0.22038	0.22038	0.329615	0.065963	28.37	1985219	140199	0.670385	0.329615
2014	177	SC Firm 177	1	US	0	SERV	4000	HCARE	1	0.412602	0.0810143	0	0	0.0795372	5.09295	14.0726	0.0271988	0.0590861	2.3882	0.114038	0.0381491	0.152187	0.152187	0.412602	0.0810143	30.93	2197793	193749	0.587398	0.412602
2004	178	SC Firm 178	1	US	1	MAN	2000	IND	1	0.276155	0.186611	0.0643345	0.0397062	0.103148	1.47985	12.2818	0.111345	0.0140829	3.78574	-0.00219077	0.114675	0.112484	0.112484	0.276155	0.186611	9.19782	438450	100591	0.723845	0.27103
2005	178	SC Firm 178	1	US	1	MAN	2000	IND	1	0.320666	0.204068	0.103388	0.0589402	0.119502	1.57137	12.5049	0.107118	0.00915311	3.34522	0.089754	0.0245189	0.114273	0.114273	0.320666	0.204068	10.5374	544836	139690	0.679334	0.293824
2006	178	SC Firm 178	1	US	1	MAN	2000	IND	1	0.354337	0.170714	0.137525	0.0564365	0.144783	2.07562	12.8795	0.0925348	0.0159339	2.66663	0.0931444	0.0364481	0.129592	0.129592	0.354337	0.170714	15.8102	920567	189505	0.645663	0.303836
2007	178	SC Firm 178	1	US	1	MAN	2000	IND	1	0.355464	0.13616	0.120886	0.0378145	0.155521	2.61063	13.1381	0.0879991	0.00793395	1.77857	0.0552826	0.0390257	0.0943083	0.0943083	0.355464	0.13616	22.1823	1423691	224405	0.644536	0.322744
2008	178	SC Firm 178	1	US	1	MAN	2000	IND	1	0.324577	0.177764	0.0760303	0.0356982	0.178614	1.82589	13.2748	0.088636	0.014225	-0.291621	-0.00711707	0.00711707	0	0	0.324577	0.177764	15.8102	1015702	219590	0.675423	0.326929
2009	178	SC Firm 178	1	US	1	MAN	2000	IND	1	0.380101	0.219007	0.108739	0.0528486	0.140839	1.73557	13.1962	0.0825859	0.0254194	-2.77553	0.0804874	0.00104378	0.0815312	0.0815312	0.380101	0.219007	18.0495	993434	278580	0.619899	0.360875
2010	178	SC Firm 178	1	US	1	MAN	2000	IND	1	0.341873	0.139948	0.0269011	0.00858527	0.162184	2.44286	13.3327	0.0754859	0.0136146	2.53192	-0.0145297	0.0110818	-0.00344787	-0.00344787	0.341873	0.139948	25.9719	1642221	267223	0.658127	0.381645
2011	178	SC Firm 178	1	US	1	MAN	2000	IND	1	0.375211	0.128291	0.0639328	0.0164623	0.166804	2.92469	13.5475	0.0712743	0.00525278	1.60145	0.0912537	0.0159032	0.107157	0.107157	0.375211	0.128291	37.2045	2399232	353099	0.624789	0.395125
2012	178	SC Firm 178	1	US	1	MAN	2000	IND	1	0.407208	0.192155	0.157129	0.0606371	0.162594	2.11916	13.7072	0.0675008	0.00721622	2.32108	0.111195	0.0365102	0.147705	0.147705	0.407208	0.192155	35.595	2042098	485737	0.592792	0.372515
2013	178	SC Firm 178	1	US	1	MAN	2000	IND	1	0.520665	0.183297	0.339387	0.0959636	0.143756	2.84055	13.8242	0.0637548	0.0121177	2.21931	0.203814	0.0346735	0.238488	0.238488	0.520665	0.183297	57.95	3556426	798187	0.479335	0.358218
2014	178	SC Firm 178	1	US	1	MAN	2000	IND	1	0.455476	0.158195	0.288687	0.0835607	0.168643	2.87921	13.9398	0.0630299	0.0118911	2.3882	-0.0805029	-0.00807339	-0.0885763	-0.0885763	0.455476	0.158195	60.4	3609455	678301	0.544524	0.309305
2004	179	SC Firm 179	1	US	1	MAN	1	OILGAS	1	0.211936	0.170823	0.152825	0.121412	0.0926748	1.24068	13.2863	0.709868	0.00254902	3.78574	-0.0132822	0.0140549	0.000772651	0.000772651	0.211936	0.170823	17.02	1447280	298161	0.788064	0.208079
2005	179	SC Firm 179	1	US	1	MAN	1	OILGAS	1	0.202686	0.0970607	0.131043	0.0599461	0.165618	2.08824	13.5933	0.590354	0.0564525	3.34522	0.0234322	0.0642757	0.0877079	0.0877079	0.202686	0.0970607	30.955	3136330	337137	0.797314	0.230927
2006	179	SC Firm 179	1	US	1	MAN	1	OILGAS	1	0.226214	0.167965	0.109791	0.0784802	0.239553	1.34679	14.0183	0.69477	0.0595588	2.66663	0.0682827	0.0233526	0.0916353	0.0916353	0.226214	0.167965	24.47	2392106	482901	0.773786	0.257224
2007	179	SC Firm 179	1	US	1	MAN	1	OILGAS	1	0.244793	0.172116	0.169585	0.115813	0.249536	1.42225	14.3039	0.746045	0.00491743	1.77857	0.0774313	0.0334793	0.110911	0.110911	0.244793	0.172116	40.07	3397411	706319	0.755207	0.216559
2008	179	SC Firm 179	1	US	1	MAN	1	OILGAS	1	0.234838	0.15641	0.154514	0.0994261	0.229448	1.50142	14.4411	0.747552	0.0169109	-0.291621	0.0379842	0.0361297	0.0741139	0.0741139	0.234838	0.15641	22.75	4544556	842608	0.765162	0.22877
2009	179	SC Firm 179	1	US	1	MAN	1	OILGAS	1	0.19362	0.161924	0.135296	0.111824	0.199582	1.19575	14.4273	0.767665	0.0212879	-2.77553	-0.00888027	0.0666918	0.0578115	0.0578115	0.19362	0.161924	39.88	4169870	805657	0.80638	0.229034
2010	179	SC Firm 179	1	US	1	MAN	1	OILGAS	1	0.160953	0.13819	0.0913973	0.0775621	0.166331	1.16472	14.4442	0.767816	0.0283892	2.53192	-0.0279308	0.0212188	-0.00671196	-0.00671196	0.160953	0.13819	48.48	4281443	686522	0.839047	0.2574
2011	179	SC Firm 179	1	US	1	MAN	1	OILGAS	1	0.151595	0.148555	0.0761643	0.0745045	0.200659	1.02046	14.7492	0.734842	0.0232376	1.60145	0.0143972	0.0519967	0.0663939	0.0663939	0.151595	0.148555	58.36	4347705	758564	0.848405	0.276554
2012	179	SC Firm 179	1	US	1	MAN	1	OILGAS	1	0.118342	0.118586	0.0445157	0.0446152	0.223371	0.997943	14.9635	0.76062	0.0127393	2.32108	-0.0142485	0.043283	0.0290345	0.0290345	0.118342	0.118586	56.01	5032267	677047	0.881658	0.288597
2013	179	SC Firm 179	1	US	1	MAN	1	OILGAS	1	0.0954725	0.075176	0.0332668	0.0258171	0.22241	1.26999	15.0356	0.746406	0.00420561	2.21931	-0.0125986	0.00403874	-0.00855985	-0.00855985	0.0954725	0.075176	84.08	7358135	598119	0.904527	0.25956
2014	179	SC Firm 179	1	US	1	MAN	1	OILGAS	1	0.0914689	0.0548529	0.0127942	0.0074155	0.231923	1.66753	15.1292	0.77199	0.0030703	2.3882	0.00247627	0.00243922	0.00491549	0.00491549	0.0914689	0.0548529	67.42	10592694	614762	0.908531	0.26051
2004	180	SC Firm 180	1	US	0	SERV	4000	HCARE	1	0.518155	0.300849	0.31352	0.154514	0.100065	1.72231	15.1761	0.0723611	0.0344395	3.78574	0.1967	0.0221825	0.218883	0.218883	0.518155	0.300849	34.82	2930517	1261018	0.481845	0.325459
2005	180	SC Firm 180	1	US	0	SERV	4000	HCARE	1	0.495344	0.251865	0.286961	0.121292	0.123186	1.96671	15.3254	0.0738433	0.0159877	3.34522	0.00716808	0.0302893	0.0374574	0.0374574	0.495344	0.251865	43.64	3800705	1279534	0.504656	0.313319
2006	180	SC Firm 180	1	US	0	SERV	4000	HCARE	1	0.467817	0.237191	0.245672	0.103302		1.97232	15.4292	0.0781071	0.00280648	2.66663	0.0237111	0.0310658	0.0547768	0.0547768	0.467817	0.237191	48.98	4334697	1347849	0.532183	0.316129
2007	180	SC Firm 180	1	US	0	SERV	4000	HCARE	1	0.438669	0.207273	0.197068	0.0758866	0.137611	2.11638	15.5887	0.0747351	0.00792382	1.77857	0.0319534	0.039244	0.0711974	0.0711974	0.438669	0.207273	61.4	5559907	1453742	0.561331	0.325117
2008	180	SC Firm 180	1	US	0	SERV	4000	HCARE	1	0.481139	0.353919	0.182889	0.116781	0.143233	1.35946	15.6687	0.0688582	0.00437798	-0.291621	0.0772328	-0.0469964	0.0302364	0.0302364	0.481139	0.353919	36.69	3161268	1731719	0.518861	0.391511
2009	180	SC Firm 180	1	US	0	SERV	4000	HCARE	1	0.410202	0.246717	0.105862	0.0528103	0.141486	1.66264	15.6932	0.0676687	0.00108734	-2.77553	-0.0412382	0.0218486	-0.0193895	-0.0193895	0.410202	0.246717	52.6	4804343	1573530	0.589798	0.366696
2010	180	SC Firm 180	1	US	0	SERV	4000	HCARE	1	0.427847	0.253978	0.145015	0.0716838	0.138476	1.68458	15.834	0.0555414	0.0029088	2.53192	0.0818237	0.0116161	0.0934398	0.0934398	0.427847	0.253978	61.39	5714958	1945621	0.572153	0.372634
2011	180	SC Firm 180	1	US	0	SERV	4000	HCARE	1	0.447071	0.267802	0.144125	0.0707822	0.14644	1.66941	15.9591	0.0552911	0.0038983	1.60145	0.0366153	-0.0441311	-0.00751581	-0.00751581	0.447071	0.267802	64.43	5794066	2119183	0.552929	0.393778
2012	180	SC Firm 180	1	US	0	SERV	4000	HCARE	1	0.473116	0.264303	0.159489	0.0705599	0.142384	1.79005	16.006	0.051267	0.00277442	2.32108	0.0758184	0.00243907	0.0782574	0.0782574	0.473116	0.264303	80.42	7024540	2523598	0.526884	0.410036
2013	180	SC Firm 180	1	US	0	SERV	4000	HCARE	1	0.4695	0.212305	0.13986	0.0471831	0.143136	2.21144	16.0732	0.0490499	0.00104938	2.21931	0.020831	-0.0072698	0.0135612	0.0135612	0.4695	0.212305	114.26	9797777	2640765	0.5305	0.418562
2014	180	SC Firm 180	1	US	0	SERV	4000	HCARE	1	0.500438	0.210222	0.192588	0.0596015	0.140474	2.38053	16.1546	0.0507421	0.00274193	2.3882	0.0702628	-0.0262942	0.0439686	0.0439686	0.500438	0.210222	136.15	11541513	3072095	0.499562	0.422513
2005	181	SC Firm 181	1	US	1	MAN	3000	CGOODS	1	0.66388	0.195982	0.483009	0.10338	0.30378	3.38746	14.2645	0.0775196	0.0815035	3.34522	-0.236111	-0.00743136	-0.243542	-0.243542	0.66388	0.195982	16.26	2281818	556199	0.33612	0.484388
2006	181	SC Firm 181	1	US	1	MAN	3000	CGOODS	1	0.527951	0.157371	0.278653	0.060597	0.282163	3.35483	14.4497	0.103513	0.00623368	2.66663	-0.0189865	0.054571	0.0355844	0.0355844	0.527951	0.157371	20.08	2874745	536891	0.472049	0.469652
2007	181	SC Firm 181	1	US	1	MAN	3000	CGOODS	1	0.728433	0.232461	0.557501	0.12454	0.326329	3.13357	14.579	0.113402	0.0288207	1.77857	0.225369	0.00596865	0.231338	0.231338	0.728433	0.232461	20.14	2566865	777415	0.271567	0.487093
2008	181	SC Firm 181	1	US	1	MAN	3000	CGOODS	1	0.691964	0.36825	0.504465	0.208963	0.34574	1.87906	14.6738	0.156505	0.00626062	-0.291621	-0.00134039	0.00736722	0.00602684	0.00602684	0.691964	0.36825	10.84	1331114	775912	0.308036	0.470835
2009	181	SC Firm 181	1	US	1	MAN	3000	CGOODS	1	0.618757	0.227166	0.364249	0.09401	0.31392	2.72381	14.659	0.155324	0.0302926	-2.77553	-0.0582749	0.00376947	-0.0545055	-0.0545055	0.618757	0.227166	20.285	2412501	709126	0.381243	0.468048
2010	181	SC Firm 181	1	US	1	MAN	3000	CGOODS	1	0.559507	0.147714	0.247127	0.0428685	0.370172	3.78778	14.8214	0.14399	0.0389213	2.53192	-0.0159793	-9.81968e-05	-0.0160775	-0.0160775	0.559507	0.147714	34.185	3977939	689436	0.440493	0.460017
2011	181	SC Firm 181	1	US	1	MAN	3000	CGOODS	1	0.577237	0.125029	0.247667	0.0333049	0.397801	4.61683	15.0552	0.132394	0.0493732	1.60145	0.106013	0.0324994	0.138512	0.138512	0.577237	0.125029	51.67	5910226	844541	0.422763	0.486175
2012	181	SC Firm 181	1	US	1	MAN	3000	CGOODS	1	0.734091	0.266801	0.515402	0.122952	0.397801	2.75145	15.2197	0.140873	0.000472978	2.32108	0.244259	0.00621874	0.250477	0.250477	0.734091	0.266801	32.94	3478217	1265678	0.265909	0.487809
2013	181	SC Firm 181	1	US	1	MAN	3000	CGOODS	1	0.750385	0.191057	0.601307	0.105939	0.331493	3.92755	15.3894	0.1289	0.0610947	2.21931	0.238732	0.0140777	0.252809	0.252809	0.750385	0.191057	78.7	7859345	1856229	0.249615	0.400609
2004	182	SC Firm 182	1	US	1	MAN	3000	CGOODS	1	0.61804	0.146802	0.474107	0.0874791	0.279647	4.21003	15.3008	0.441331	0.00728619	3.78574	0.113137	-0.0816477	0.0314893	0.0314893	0.61804	0.146802	55.54	13695493	2356452	0.38196	0.357419
2005	182	SC Firm 182	1	US	1	MAN	3000	CGOODS	1	0.667668	0.176391	0.554308	0.117061	0.27405	3.78517	15.3882	0.389222	0.00495103	3.34522	0.11486	-0.0720229	0.0428372	0.0428372	0.667668	0.176391	55.25	13288954	2846066	0.332332	0.348242
2006	182	SC Firm 182	1	US	1	MAN	3000	CGOODS	1	0.766828	0.217542	0.683355	0.154295	0.290325	3.52496	15.4137	0.39718	0.0136758	2.66663	0.0822772	-0.185479	-0.103201	-0.103201	0.766828	0.217542	49.8	11467125	3188139	0.233172	0.33241
2007	182	SC Firm 182	1	US	1	MAN	3000	CGOODS	1	0.817814	0.279678	0.734113	0.192775	0.246431	2.92413	15.4142	0.362532	0.0488038	1.77857	0.0671539	-0.0370965	0.0300574	0.0300574	0.817814	0.279678	39.4	8945764	3473349	0.182186	0.35738
2008	182	SC Firm 182	1	US	1	MAN	3000	CGOODS	1	0.911453	0.29579	0.861828	0.202883	0.257018	3.08141	15.4512	0.401393	0.0107162	-0.291621	-0.0441506	-0.137665	-0.181816	-0.181816	0.911453	0.29579	34.74	7887198	3312874	0.0885474	0.360155
2009	182	SC Firm 182	1	US	1	MAN	3000	CGOODS	1	0.803958	0.265827	0.681565	0.158939	0.27942	3.02436	15.483	0.382246	0.0292792	-2.77553	-0.0974963	0.0615023	-0.035994	-0.035994	0.803958	0.265827	35.79	8160058	2954572	0.196042	0.384358
2010	182	SC Firm 182	1	US	1	MAN	3000	CGOODS	1	0.78882	0.239463	0.669435	0.145814	0.285911	3.29412	15.5509	0.336483	0.00706582	2.53192	0.0973251	-0.0104168	0.0869083	0.0869083	0.78882	0.239463	47.15	10704475	3370416	0.21118	0.361153
2011	182	SC Firm 182	1	US	1	MAN	3000	CGOODS	1	0.805469	0.203274	0.687736	0.119494	0.299097	3.96247	15.6206	0.353911	0.00732684	1.60145	0.0406982	-0.0858101	-0.0451118	-0.0451118	0.805469	0.203274	61.78	13913222	3549777	0.194531	0.377029
2012	182	SC Firm 182	1	US	1	MAN	3000	CGOODS	1	0.77446	0.185567	0.640044	0.105534	0.310596	4.17349	15.7093	0.352077	0.0115142	2.32108	0.0278992	-0.0220062	0.00589294	0.00589294	0.77446	0.185567	72.22	16161827	3682433	0.22554	0.380922
2013	182	SC Firm 182	1	US	1	MAN	3000	CGOODS	1	0.681	0.14354	0.534456	0.0826763	0.293329	4.74434	15.7821	0.336976	0.00750704	2.21931	-0.00634308	0.0391906	0.0328475	0.0328475	0.681	0.14354	97.23	21769284	3648450	0.319	0.334231
2014	182	SC Firm 182	1	US	1	MAN	3000	CGOODS	1	0.712086	0.148421	0.573605	0.0865896	0.292942	4.79776	15.8199	0.382705	0.000341707	2.3882	0.063227	0.410394	0.473621	0.473621	0.712086	0.148421	103.93	22973202	4003967	0.287914	0.342445
2006	183	SC Firm 183	1	US	1	MAN	1	OILGAS	1	0.542688	0.438181	0.268757	0.194559	0.218385	1.2385	17.153	0.548436	0.0416122	2.66663	0.0328402	0.0355138	0.068354	0.068354	0.542688	0.438181	49.57	15615440	12179000	0.457312	0.468898
2007	183	SC Firm 183	1	US	1	MAN	1	OILGAS	1	0.535571	0.302068	0.24696	0.109595	0.21419	1.77302	17.2752	0.560024	0.00704706	1.77857	0.069496	0.00642915	0.0759251	0.0759251	0.535571	0.302068	100.86	32335674	13995000	0.464429	0.473652
2008	183	SC Firm 183	1	US	1	MAN	1	OILGAS	1	0.491133	0.445255	0.213749	0.184393	0.243066	1.10304	17.5295	0.569135	0.0136224	-0.291621	0.00160901	0.00636608	0.0079751	0.0079751	0.491133	0.445255	53.64	17493760	14041000	0.508867	0.43118
2009	183	SC Firm 183	1	US	1	MAN	1	OILGAS	1	0.470355	0.411779	0.222538	0.184097	0.14899	1.14225	17.21	0.564297	0.0698749	-2.77553	-0.00617682	0.0152384	0.0090616	0.0090616	0.470355	0.411779	60.5	19797384	13859000	0.529645	0.394163
2010	183	SC Firm 183	1	US	1	MAN	1	OILGAS	1	0.443892	0.378073	0.22096	0.177638	0.164849	1.17409	17.3397	0.596875	0.0177231	2.53192	0.0523505	0.0586224	0.110973	0.110973	0.443892	0.378073	76.54	25846087	15712000	0.556108	0.370776
2011	183	SC Firm 183	1	US	1	MAN	1	OILGAS	1	0.454237	0.479324	0.220929	0.238769	0.152826	0.94766	16.8828	0.631439	0.00509006	1.60145	0.0527647	0.00263185	0.0553966	0.0553966	0.454237	0.479324	56.8	19310615	17777000	0.545763	0.372113
2010	184	SC Firm 184	1	US	1	MAN	2000	IND	1	0.475876	0.253809	0.335014	0.158768	0.148239	1.87494	13.9756	0.475558	0.0118446	2.53192	-0.0574676	0.00508704	-0.0523806	-0.0523806	0.475876	0.253809	18.09	1760157	598700	0.524124	0.211827
2011	184	SC Firm 184	1	US	1	MAN	2000	IND	1	0.417048	0.193503	0.238249	0.0949355	0.177531	2.15526	14.1465	0.524744	0.022197	1.60145	-0.0180219	0.00530485	-0.0127171	-0.0127171	0.417048	0.193503	24.21	2391948	573900	0.582952	0.234721
2012	184	SC Firm 184	1	US	1	MAN	2000	IND	1	0.379889	0.184417	0.205165	0.0869859	0.184954	2.05995	14.2718	0.570395	0.0084348	2.32108	0.0218951	0.0172166	0.0391117	0.0391117	0.379889	0.184417	26.96	2693304	609000	0.620111	0.219824
2013	184	SC Firm 184	1	US	1	MAN	2000	IND	1	0.368008	0.132606	0.202693	0.0625684	0.179838	2.7752	14.3332	0.581341	0.00122492	2.21931	0.036327	-0.0117641	0.0245629	0.0245629	0.368008	0.132606	44.69	4419841	675700	0.631992	0.207342
2014	184	SC Firm 184	1	US	1	MAN	2000	IND	1	0.435327	0.182829	0.265803	0.0950762	0.185131	2.38106	14.4337	0.608034	0.00185685	2.3882	0.103516	-0.107985	-0.00446867	-0.00446867	0.435327	0.182829	41.49	3962295	886500	0.564673	0.230898
2004	185	SC Firm 185	1	US	0	SERV	4000	HCARE	1	0.428226	0.220591	0.238739	0.105955	0.220396	1.94127	14.4193	0.179797	0.0675029	3.78574	-0.250069	-0.0526825	-0.302752	-0.302752	0.428226	0.220591	29.8615	3130491	886000	0.571774	0.251329
2005	185	SC Firm 185	1	US	0	SERV	4000	HCARE	1	0.54843	0.297897	0.26173	0.110204	0.178565	1.84101	14.4772	0.169058	0.0213615	3.34522	0.151121	-0.00538117	0.14574	0.14574	0.54843	0.297897	26.5656	2882450	1223000	0.45157	0.404933
2006	185	SC Firm 185	1	US	0	SERV	4000	HCARE	1	0.392217	0.179583	0.231715	0.0928075	0.123502	2.18405	14.0688	0.189452	0.0421523	2.66663	-0.233999	0.0143369	-0.219662	-0.219662	0.392217	0.179583	30.6088	3499445	766000	0.607783	0.238095
2007	185	SC Firm 185	1	US	0	SERV	4000	HCARE	1	0.378932	0.190411	0.21373	0.0948468	0.109353	1.99007	14.1204	0.193812	0.00771895	1.77857	0.0170997	0.0101086	0.0272083	0.0272083	0.378932	0.190411	29.9636	3410781	802200	0.621068	0.227586
2008	185	SC Firm 185	1	US	0	SERV	4000	HCARE	1	0.349666	0.237734	0.168558	0.105221	0.154802	1.47082	14.2261	0.175632	0.0220807	-0.291621	-0.125037	0.000887626	-0.124149	-0.124149	0.349666	0.237734	16.46	1894646	590900	0.650334	0.227528
2009	185	SC Firm 185	1	US	0	SERV	4000	HCARE	1	0.492049	0.307649	0.243841	0.128861	0.180594	1.59938	14.1426	0.220996	0.00795477	-2.77553	0.0126562	-0.0340743	-0.0214181	-0.0214181	0.492049	0.307649	23.99	1364900	606500	0.507951	0.341879
2010	185	SC Firm 185	1	US	0	SERV	4000	HCARE	1	0.406872	0.183608	0.170261	0.0630348	0.231455	2.21598	14.2005	0.195649	0.0368478	2.53192	-0.0800417	0.0114804	-0.0685613	-0.0685613	0.406872	0.183608	39.37	2253421	506800	0.593128	0.310292
2011	185	SC Firm 185	1	US	0	SERV	4000	HCARE	1	0.401201	0.219635	0.162648	0.0754397	0.272342	1.82667	14.2803	0.171503	0.0289567	1.60145	0.0110846	-0.0516511	-0.0405665	-0.0405665	0.401201	0.219635	33.69	1851825	521200	0.598799	0.312755
2012	185	SC Firm 185	1	US	0	SERV	4000	HCARE	1	0.458897	0.297137	0.285958	0.16641	0.214549	1.5444	14.3067	0.153662	0.0328406	2.32108	0.13867	0.00755714	0.146228	0.146228	0.458897	0.297137	28.5	1766759	746900	0.541103	0.284038
2013	185	SC Firm 185	1	US	0	SERV	4000	HCARE	1	0.416625	0.239703	0.249047	0.12771	0.22454	1.73808	14.3556	0.147656	0.00354425	2.21931	-0.0540711	-0.0179607	-0.0720318	-0.0720318	0.416625	0.239703	41.34	2096893	661100	0.583375	0.265377
2014	185	SC Firm 185	1	US	0	SERV	4000	HCARE	1	0.522002	0.277628	0.369969	0.171267	0.210547	1.88022	14.3379	0.149249	0.000786641	2.3882	0.144684	-0.0651789	0.0795046	0.0795046	0.522002	0.277628	45.62	2379736	914600	0.477998	0.259003
2004	186	SC Firm 186	1	US	0	SERV	4000	HCARE	1	0.212162	0.0854775	0	0	0.089013	2.48208	11.3336	0.0545635	0.0291927	3.78574	0.0489023	0.0271317	0.0760341	0.0760341	0.212162	0.0854775	3	174019	16265	0.787838	0.212162
2005	186	SC Firm 186	1	US	0	SERV	4000	HCARE	1	0.169313	0.0845938	0	0	0.112738	2.00148	11.3336	0.0860036	0.0138911	3.34522	-0.0163583	0.0495885	0.0332302	0.0332302	0.169313	0.0845938	2.55	160500	14832	0.830687	0.169313
2006	186	SC Firm 186	1	US	0	SERV	4000	HCARE	1	0.320116	0.124497	0.22759	0.0817163	0.110943	2.57128	11.3844	0.0773325	0.0259645	2.66663	0.225791	0.185528	0.411319	0.411319	0.320116	0.124497	5.04999	353980	50336	0.679884	0.119789
2007	186	SC Firm 186	1	US	0	SERV	4000	HCARE	1	0.262366	0.056649	0.145497	0.0279438	0.204801	4.63143	11.8958	0.087698	0.0711258	1.77857	-0.00523658	0.0897714	0.0845348	0.0845348	0.262366	0.056649	11.07	821821	49351	0.737634	0.136768
2008	186	SC Firm 186	1	US	0	SERV	4000	HCARE	1	0.19842	0.0520471	0.0885342	0.0210904	0.218998	3.81232	12.1254	0.0798021	0.0104073	-0.291621	-0.0233694	0.0819638	0.0585943	0.0585943	0.19842	0.0520471	10.5067	804139	44151	0.80158	0.120559
2009	186	SC Firm 186	1	US	0	SERV	4000	HCARE	1	0.118329	0.0244462	0	0	0.241897	4.95246	12.3425	0.0772306	0.0187932	-2.77553	-0.0448042	0.111619	0.0668147	0.0668147	0.118329	0.0244462	16.23	1308328	32025	0.881671	0.119533
2010	186	SC Firm 186	1	US	0	SERV	4000	HCARE	1	0.111925	0.0244462	0	0	0.234205	5.21129	12.621	0.1267	0.00178135	2.53192	0.0211785	0.0983126	0.119491	0.119491	0.111925	0.0244462	21.59	1799591	39499	0.888075	0.12827
2011	186	SC Firm 186	1	US	0	SERV	4000	HCARE	1	0.464419	0.128544	0.429134	0.113376	0.124816	3.61291	12.8044	0.146293	0.0637238	1.60145	0.364544	0.120099	0.484644	0.484644	0.464419	0.128544	31.98	2737082	403734	0.535581	0.147348
2012	186	SC Firm 186	1	US	0	SERV	4000	HCARE	1	0.436724	0.152654	0.388353	0.128565	0.174786	2.86087	13.0683	0.139106	0.00567675	2.32108	0.00246208	0.00813809	0.0106002	0.0106002	0.436724	0.152654	25.92	2253736	406023	0.563276	0.144485
2013	186	SC Firm 186	1	US	0	SERV	4000	HCARE	1	0.368358	0.140386	0.295517	0.105123	0.153933	2.62389	13.1058	0.140002	0.0135727	2.21931	-0.093766	-0.00991803	-0.103684	-0.103684	0.368358	0.140386	22.7	1981713	323640	0.631642	0.163176
2014	186	SC Firm 186	1	US	0	SERV	4000	HCARE	1	0.337173	0.137709	0.253021	0.09612	0.108605	2.44845	13.0018	0.131701	0.0346604	2.3882	-0.0301877	0.0170649	-0.0131228	-0.0131228	0.337173	0.137709	21.14	1860006	297045	0.662827	0.170379
2006	187	SC Firm 187	1	US	1	MAN	3000	CGOODS	1	0.571708	0.247868	0.375364	0.129193	0.227297	2.3065	14.8013	0.252742	0.015886	2.66663	0.155146	-0.00947765	0.145669	0.145669	0.571708	0.247868	44.41	2127477	701119	0.428292	0.338242
2007	187	SC Firm 187	1	US	1	MAN	3000	CGOODS	1	0.597689	0.311522	0.380489	0.157582	0.225041	1.91861	14.7596	0.253055	0.00145983	1.77857	0.0167998	-0.00121543	0.0155844	0.0155844	0.597689	0.311522	35.06	1594315	721396	0.402311	0.372697
2008	187	SC Firm 187	1	US	1	MAN	3000	CGOODS	1	0.593263	0.356924	0.408583	0.208163	0.15305	1.66215	14.7032	0.27076	0.0535246	-0.291621	-0.0256265	-0.00152707	-0.0271536	-0.0271536	0.593263	0.356924	27.63	1245930	691525	0.406737	0.333948
2009	187	SC Firm 187	1	US	1	MAN	3000	CGOODS	1	0.553958	0.282492	0.311249	0.125308	0.130332	1.96097	14.3	0.261586	0.0267469	-2.77553	-0.141513	0.0145988	-0.126914	-0.126914	0.553958	0.282492	31.2	1399030	550815	0.446042	0.376756
2005	188	SC Firm 188	1	US	1	MAN	1	OILGAS	1	0.66109	0.304054	0.288457	0.0832403	0.254826	2.17425	14.9294	0.276611	0.0589586	3.34522	0.116568	-0.112922	0.00364511	0.00364511	0.66109	0.304054	13.8042	1729393	755560	0.33891	0.532438
2006	188	SC Firm 188	1	US	1	MAN	1	OILGAS	1	0.606687	0.208943	0.252436	0.0546618	0.317312	2.9036	15.2076	0.327555	0.0441661	2.66663	-0.00368456	-0.121697	-0.125382	-0.125382	0.606687	0.208943	24.1051	2843274	750999	0.393313	0.490658
2007	188	SC Firm 188	1	US	1	MAN	1	OILGAS	1	0.619743	0.278042	0.209901	0.0590685	0.306373	2.22895	15.3824	0.319031	0.00855114	1.77857	0.168406	-0.0980339	0.0703725	0.0703725	0.619743	0.278042	23.8659	2677637	1031218	0.380257	0.54212
2008	188	SC Firm 188	1	US	1	MAN	1	OILGAS	1	0.673982	0.581137	0.377734	0.289465	0.138441	1.15976	15.5837	0.625818	0.124345	-0.291621	0.123772	-0.0598167	0.063955	0.063955	0.673982	0.581137	8.54935	910465	1263194	0.326018	0.513157
2004	189	SC Firm 189	1	US	0	SERV	5000	CSERV	1	0.34531	0.136884	0.0779282	0.0247822	0.23693	2.52266	18.1073	0.582419	0.00306092	3.78574	0.0617888	-0.0540748	0.00771399	0.00771399	0.34531	0.136884	40.48	84960000	13474000	0.65469	0.325551
2005	189	SC Firm 189	1	US	0	SERV	5000	CSERV	1	0.372706	0.173786	0.127896	0.0493555	0.239297	2.14462	18.1596	0.56077	0.000432549	3.34522	0.0692715	-0.0601734	0.00909807	0.00909807	0.372706	0.173786	40.16	78681800	16550000	0.627294	0.302016
2006	189	SC Firm 189	1	US	0	SERV	5000	CSERV	1	0.493982	0.334082	0.306007	0.184739	0.19995	1.47863	18.1852	0.50906	0.0241097	2.66663	0.177315	-0.105581	0.0717333	0.0717333	0.493982	0.334082	26.94	51460500	25817000	0.506018	0.297955
2007	189	SC Firm 189	1	US	0	SERV	5000	CSERV	1	0.58483	0.415171	0.421902	0.268896	0.20199	1.40865	18.1638	0.61989	0.0044224	1.77857	0.00236892	0.307283	0.309652	0.309652	0.58483	0.415171	23.02	36514880	25922000	0.41517	0.297356
2008	189	SC Firm 189	1	US	0	SERV	5000	CSERV	1	0.559178	0.326131	0.386545	0.193813	0.172359	1.71458	18.0822	0.637304	0.0243185	-0.291621	-0.0705471	-0.0233456	-0.0938927	-0.0938927	0.559178	0.326131	28.93	47560980	23018000	0.440822	0.290375
2009	189	SC Firm 189	1	US	0	SERV	5000	CSERV	1	0.517773	0.262173	0.329387	0.13982	0.16283	1.97493	18.0078	0.625046	0.0056043	-2.77553	-0.0453311	0.0105928	-0.0347384	-0.0347384	0.517773	0.262173	35.06	59564100	21165000	0.482227	0.28872
2010	189	SC Firm 189	1	US	0	SERV	5000	CSERV	1	0.522467	0.233117	0.337219	0.123853	0.185794	2.24123	18.035	0.624548	0.0172886	2.53192	-0.00500935	-0.0578193	-0.0628287	-0.0628287	0.522467	0.233117	42.04	68965190	20964000	0.477533	0.28628
2011	189	SC Firm 189	1	US	0	SERV	5000	CSERV	1	0.549879	0.182394	0.371667	0.0974867	0.203218	3.01479	18.0696	0.603386	0.0133472	1.60145	0.0324794	-0.0783356	-0.0458562	-0.0458562	0.549879	0.182394	61.85	99873200	22280000	0.450121	0.292018
2012	189	SC Firm 189	1	US	0	SERV	5000	CSERV	1	0.559537	0.178145	0.373667	0.0923927	0.230017	3.14091	18.1297	0.585849	0.017417	2.32108	0.017233	-0.0714147	-0.0541817	-0.0541817	0.559537	0.178145	82.34	106053000	22988000	0.440463	0.304522
2013	189	SC Firm 189	1	US	0	SERV	5000	CSERV	1	0.678266	0.167615	0.530403	0.0973803	0.269584	4.04657	18.1826	0.576238	0.0262995	2.21931	0.110914	-0.202429	-0.0915149	-0.0915149	0.678266	0.167615	104.97	136476940	27482000	0.321734	0.327558
2004	190	SC Firm 190	1	US	1	MAN	2000	IND	1	0.624976	0.392087	0.311606	0.149073	0.0695061	1.59397	17.0578	0.139431	0.0106364	3.78574	0.0368296	-0.00109459	0.035735	0.035735	0.624976	0.392087	35.2084	30098970	19413000	0.375024	0.467999
2005	190	SC Firm 190	1	US	1	MAN	2000	IND	1	0.649227	0.399279	0.315146	0.141817	0.0971138	1.626	17.1352	0.147251	0.0189021	3.34522	0.0355325	-0.0321184	0.00341416	0.00341416	0.649227	0.399279	37.038	30898243	20537000	0.350773	0.498372
2006	190	SC Firm 190	1	US	1	MAN	2000	IND	1	0.674477	0.36556	0.334523	0.122645	0.127274	1.84505	17.2613	0.155037	0.0177781	2.66663	0.0107301	-0.0761772	-0.0654471	-0.0654471	0.674477	0.36556	44.9825	36218759	20869000	0.325523	0.52222
2007	190	SC Firm 190	1	US	1	MAN	2000	IND	1	0.705487	0.341606	0.434736	0.142795	0.150777	2.06521	17.359	0.147463	0.0172563	1.77857	0.0881526	-0.0540157	0.034137	0.034137	0.705487	0.341606	61.2195	45965321	23849000	0.294513	0.500695
2008	190	SC Firm 190	1	US	1	MAN	2000	IND	1	0.777825	0.533724	0.515068	0.25776	0.0626374	1.45735	17.4144	0.139025	0.0628075	-0.291621	0.105833	-0.11406	-0.00822767	-0.00822767	0.777825	0.533724	32.6431	24116466	27605000	0.222175	0.56151
2009	190	SC Firm 190	1	US	1	MAN	2000	IND	1	0.738755	0.470228	0.447208	0.202508	0.103465	1.57106	17.2151	0.134665	0.0284723	-2.77553	-0.0281999	0.104048	0.0758481	0.0758481	0.738755	0.470228	38.9769	29957004	26590000	0.261245	0.542467
2010	190	SC Firm 190	1	US	1	MAN	2000	IND	1	0.701274	0.389282	0.370222	0.137647	0.122139	1.80146	17.2921	0.124861	0.013464	2.53192	-0.00153301	0.0218058	0.0202728	0.0202728	0.701274	0.389282	52.8574	41624280	26532000	0.298726	0.542475
2011	190	SC Firm 190	1	US	1	MAN	2000	IND	1	0.711566	0.402181	0.396859	0.152135	0.106235	1.76927	17.4136	0.120679	0.00995598	1.60145	0.0450663	-0.0202472	0.0248191	0.0248191	0.711566	0.402181	54.0406	42104945	28326000	0.288434	0.538761
2012	190	SC Firm 190	1	US	1	MAN	2000	IND	1	0.674981	0.362485	0.355278	0.131094	0.131962	1.8621	17.4442	0.11949	0.0193862	2.32108	-0.00181588	0.00967673	0.00786085	0.00786085	0.674981	0.362485	63.1087	49684316	28250000	0.325019	0.510883
2013	190	SC Firm 190	1	US	1	MAN	2000	IND	1	0.597865	0.274995	0.325793	0.109752	0.157258	2.17409	17.4805	0.116166	0.0181397	2.21931	-0.0239023	0.0458677	0.0219654	0.0219654	0.597865	0.274995	90.8499	71615806	27164000	0.402135	0.421239
2014	190	SC Firm 190	1	US	1	MAN	2000	IND	1	0.606323	0.260681	0.326723	0.099988	0.161581	2.32592	17.512	0.118435	0.00407347	2.3882	0.00866868	-0.0684253	-0.0597567	-0.0597567	0.606323	0.260681	99.3513	78157424	27558000	0.393677	0.420475
2010	191	SC Firm 191	1	US	0	SERV	5000	CSERV	1	0.58635	0.307541	0.356771	0.148054	0.175627	1.90657	14.8748	0.115168	0.0137469	2.53192	-0.00678436	-0.167754	-0.174539	-0.174539	0.58635	0.307541	26.7185	1776682	789077	0.41365	0.416515
2011	191	SC Firm 191	1	US	0	SERV	5000	CSERV	1	0.521261	0.255566	0.263646	0.101438	0.197039	2.03964	14.937	0.113575	0.0167105	1.60145	-0.0443966	-0.00853637	-0.0529329	-0.0529329	0.521261	0.255566	31.6089	2118092	727145	0.478739	0.405861
2012	191	SC Firm 191	1	US	0	SERV	5000	CSERV	1	0.561909	0.198536	0.299934	0.0764213	0.222793	2.83026	14.9993	0.12861	0.0161925	2.32108	0.0159848	-0.161407	-0.145423	-0.145423	0.561909	0.198536	48.0148	3021341	748436	0.438091	0.433528
2013	191	SC Firm 191	1	US	0	SERV	5000	CSERV	1	0.538751	0.179178	0.280534	0.0679219	0.241601	3.00679	15.0405	0.13358	0.0120237	2.21931	-0.0206499	-0.108265	-0.128915	-0.128915	0.538751	0.179178	54.3087	3302048	720808	0.461249	0.424701
2014	191	SC Firm 191	1	US	0	SERV	5000	CSERV	1	0.517434	0.156825	0.248164	0.0541546	0.229398	3.29944	15.0931	0.135379	0.00886775	2.3882	0.0141447	-0.0691045	-0.0549597	-0.0549597	0.517434	0.156825	66.2514	3984368	741066	0.482566	0.420144
2005	192	SC Firm 192	1	US	1	MAN	2000	IND	1	0.368772	0.18583	0	0	0.128762	1.98447	14.2088	0.0287275	0.0106384	3.34522	0.0264796	-0.0250687	0.00141083	0.00141083	0.368772	0.18583	17.675	718043	163889	0.631228	0.455299
2006	192	SC Firm 192	1	US	1	MAN	2000	IND	1	0.375849	0.143034	0	0	0.176321	2.6277	14.2915	0.0556684	0.0364921	2.66663	0.0376186	-0.0552763	-0.0176577	-0.0176577	0.375849	0.143034	27.55	1091129	182117	0.624151	0.465803
2007	192	SC Firm 192	1	US	1	MAN	2000	IND	1	0.394173	0.16349	0	0	0.199068	2.41099	14.3212	0.0602927	0.0177097	1.77857	0.0239914	-0.130462	-0.106471	-0.106471	0.394173	0.16349	26.58	992206	193920	0.605827	0.490008
2008	192	SC Firm 192	1	US	1	MAN	2000	IND	1	0.297374	0.135946	0	0	0.194671	2.18744	14.4364	0.0619293	0.00263262	-0.291621	-0.0697384	0.0262328	-0.0435056	-0.0435056	0.297374	0.135946	26.53	998394	157082	0.702626	0.403322
2009	192	SC Firm 192	1	US	1	MAN	2000	IND	1	0.274762	0.134266	0	0	0.112886	2.04639	14.2283	0.0497255	0.0580777	-2.77553	0.000788352	0.0181391	0.0189274	0.0189274	0.274762	0.134266	26.79	1015760	157534	0.725238	0.382851
2010	192	SC Firm 192	1	US	1	MAN	2000	IND	1	0.288157	0.121551	0	0	0.117053	2.37066	14.4219	0.075954	0.00879815	2.53192	0.0378674	-0.017847	0.0200204	0.0200204	0.288157	0.121551	35.14	1310745	181368	0.711843	0.402136
2011	192	SC Firm 192	1	US	1	MAN	2000	IND	1	0.370311	0.204103	0.0461494	0.0206619	0.119056	1.81433	14.8277	0.147845	0.000179613	1.60145	0.155084	0.0289693	0.184054	0.184054	0.370311	0.204103	32.43	1216856	312055	0.629689	0.44874
2012	192	SC Firm 192	1	US	1	MAN	2000	IND	1	0.346278	0.202088	0.0371773	0.0181277	0.140604	1.7135	14.9547	0.171314	0.0044437	2.32108	0.00703373	0.00298526	0.010019	0.010019	0.346278	0.202088	33.6	1257641	318525	0.653722	0.430218
2013	192	SC Firm 192	1	US	1	MAN	2000	IND	1	0.351719	0.198626	0.0411236	0.0192163	0.129445	1.77076	15.0316	0.248487	0.00412589	2.21931	0.047766	0.00851573	0.0562817	0.0562817	0.351719	0.198626	39.88	1487073	368581	0.648281	0.43636
2014	192	SC Firm 192	1	US	1	MAN	2000	IND	1	0.388443	0.250934	0.129748	0.0729005	0.109808	1.54799	15.0884	0.279118	0.016816	2.3882	0.0843649	0.00855108	0.092916	0.092916	0.388443	0.250934	38.08	1405518	470842	0.611557	0.413177
2004	193	SC Firm 193	1	US	1	MAN	2000	IND	1	0.350903	0.168224	0.226373	0.0986692	0.148146	2.08592	13.7113	0.131167	0.00813251	3.78574	0.066578	0.0700199	0.136598	0.136598	0.350903	0.168224	27	2058242	416273	0.649097	0.208524
2005	193	SC Firm 193	1	US	1	MAN	2000	IND	1	0.28655	0.141091	0.152756	0.0686764	0.166605	2.03095	13.8267	0.114521	0.0138949	3.34522	-0.048026	0.0263169	-0.0217091	-0.0217091	0.28655	0.141091	27.4067	2170351	356520	0.71345	0.209879
2006	193	SC Firm 193	1	US	1	MAN	2000	IND	1	0.353858	0.18847	0.251102	0.124487	0.147928	1.87753	13.9596	0.0993218	0.0109626	2.66663	0.140478	0.046315	0.186793	0.186793	0.353858	0.18847	31.6067	2545782	591233	0.646142	0.19725
2007	193	SC Firm 193	1	US	1	MAN	2000	IND	1	0.353036	0.192446	0.261051	0.133658	0.146177	1.83447	14.122	0.0869519	0.00207958	1.77857	0.0558737	0.0465758	0.10245	0.10245	0.353036	0.192446	36.13	2947459	702399	0.646964	0.187043
2008	193	SC Firm 193	1	US	1	MAN	2000	IND	1	0.402004	0.308464	0.300962	0.222196	0.140645	1.30325	14.2139	0.0865708	0.00636313	-0.291621	0.0755804	-0.0321568	0.0434236	0.0434236	0.402004	0.308464	24.15	1939295	865033	0.597996	0.210529
2009	193	SC Firm 193	1	US	1	MAN	2000	IND	1	0.324688	0.212659	0.220197	0.136912	0.120715	1.5268	14.1004	0.0849712	0.0171118	-2.77553	-0.087594	0.0264289	-0.0611651	-0.0611651	0.324688	0.212659	31.15	2522224	681247	0.675312	0.204919
2010	193	SC Firm 193	1	US	1	MAN	2000	IND	1	0.360038	0.210788	0.257248	0.141207	0.133652	1.70806	14.2297	0.0791713	0.0108856	2.53192	0.0740036	-0.000327078	0.0736765	0.0736765	0.360038	0.210788	39.12	3210566	857501	0.639962	0.200756
2011	193	SC Firm 193	1	US	1	MAN	2000	IND	1	0.416236	0.276507	0.328194	0.207514	0.137285	1.50534	14.4244	0.0753558	0.00177329	1.60145	0.113885	-0.00209759	0.111787	0.111787	0.416236	0.276507	37.11	3088809	1180490	0.583764	0.181291
2012	193	SC Firm 193	1	US	1	MAN	2000	IND	1	0.430476	0.237513	0.33148	0.169672	0.157077	1.81243	14.4855	0.0786823	0.0121621	2.32108	0.00666083	-0.0145039	-0.00784307	-0.00784307	0.430476	0.237513	46.53	3849282	1199043	0.569524	0.191649
2013	193	SC Firm 193	1	US	1	MAN	2000	IND	1	0.405073	0.163227	0.310572	0.114307	0.164445	2.48166	14.5207	0.0739333	0.00566276	2.21931	-0.0101687	-0.0168477	-0.0270164	-0.0270164	0.405073	0.163227	73.85	5996301	1169680	0.594927	0.187255
2014	193	SC Firm 193	1	US	1	MAN	2000	IND	1	0.444023	0.173967	0.348259	0.123508	0.179433	2.55234	14.5799	0.0754944	0.0113251	2.3882	0.0418047	-0.100121	-0.0583163	-0.0583163	0.444023	0.173967	77.84	6131141	1291251	0.555977	0.191765
2004	194	SC Firm 194	1	US	0	SERV	4000	HCARE	1	0.210267	0.0564744	0.00443714	0.00100094	0.241785	3.72322	13.2162	0.121792	0.0396354	3.78574	-0.000427818	-0.166752	-0.16718	-0.16718	0.210267	0.0564744	13.6475	1806492	108127	0.789733	0.223179
2005	194	SC Firm 194	1	US	0	SERV	4000	HCARE	1	0.235675	0.0480623	0.00146704	0.000240511	0.27927	4.90353	13.3662	0.133891	0.0176474	3.34522	0.0153115	-0.208	-0.192689	-0.192689	0.235675	0.0480623	17.995	2290404	115640	0.764325	0.246833
2006	194	SC Firm 194	1	US	0	SERV	4000	HCARE	1	0.254745	0.0545328	0.0167987	0.00287471	0.276884	4.6714	13.5132	0.178047	0.00453517	2.66663	0.0480824	-0.0923922	-0.0443098	-0.0443098	0.254745	0.0545328	19.825	2471385	142545	0.745255	0.254797
2007	194	SC Firm 194	1	US	0	SERV	4000	HCARE	1	0.354837	0.0651256	0.147983	0.0215254	0.248915	5.4485	13.7349	0.202017	0.0245281	1.77857	0.151833	-0.0843702	0.0674629	0.0674629	0.354837	0.0651256	29.315	3576665	249159	0.645163	0.263712
2008	194	SC Firm 194	1	US	0	SERV	4000	HCARE	1	0.411935	0.128589	0.257958	0.0682348	0.28736	3.2035	13.8393	0.247762	0.0221753	-0.291621	0.0864225	-0.155548	-0.0691252	-0.0691252	0.411935	0.128589	18.04	2136766	315310	0.588065	0.223093
2009	194	SC Firm 194	1	US	0	SERV	4000	HCARE	1	0.34096	0.0813844	0.188636	0.0382886	0.277751	4.1895	13.8467	0.247297	0.00541821	-2.77553	-0.0490212	-0.0488543	-0.0978755	-0.0978755	0.34096	0.0813844	26.725	3111645	275675	0.65904	0.21035
2010	194	SC Firm 194	1	US	0	SERV	4000	HCARE	1	0.33913	0.0712305	0.183537	0.0325046	0.276412	4.76101	13.9139	0.224852	0.00679822	2.53192	0.0318488	-0.090554	-0.0587052	-0.0587052	0.33913	0.0712305	34.61	3967067	304248	0.66087	0.21137
2011	194	SC Firm 194	1	US	0	SERV	4000	HCARE	1	0.453959	0.099383	0.304489	0.0549183	0.273983	4.56777	14.0133	0.210297	0.00134913	1.60145	0.158806	-0.186081	-0.0272755	-0.0272755	0.453959	0.099383	38.48	4240573	467947	0.546041	0.237499
2012	194	SC Firm 194	1	US	0	SERV	4000	HCARE	1	0.402637	0.0807516	0.245494	0.0406803	0.285403	4.98612	14.0727	0.222161	0.00618791	2.32108	-0.0213809	-0.0741961	-0.095577	-0.095577	0.402637	0.0807516	46.4	5058342	444351	0.597363	0.229139
2013	194	SC Firm 194	1	US	0	SERV	4000	HCARE	1	0.551299	0.110116	0.436901	0.072479	0.261157	5.00651	14.1355	0.228533	0.0149382	2.21931	0.190189	-0.208	-0.0178109	-0.0178109	0.551299	0.110116	53.185	5482203	678382	0.448701	0.230745
2014	194	SC Firm 194	1	US	0	SERV	4000	HCARE	1	0.884986	0.148504	0.849553	0.113467	0.23056	5.95935	14.2115	0.219321	0.0203448	2.3882	0.364544	-0.208	0.156544	0.156544	0.884986	0.148504	74.135	7023995	1225007	0.115014	0.265635
2005	195	SC Firm 195	1	US	0	SERV	5000	CSERV	1	0.390175	0.220432	0.000531995	0.000235181	0.183973	1.77005	13.0734	0.0577088	0.0189562	3.34522	-0.00635317	0.022106	0.0157528	0.0157528	0.390175	0.220432	20.52	1113772	314932	0.609825	0.408489
2006	195	SC Firm 195	1	US	0	SERV	5000	CSERV	1	0.398519	0.147313	0.00100958	0.000263445	0.104477	2.70525	13.2191	0.0562278	0.00271564	2.66663	0.0650111	0.0205549	0.0855659	0.0855659	0.398519	0.147313	39.48	2178252	376322	0.601481	0.400864
2007	195	SC Firm 195	1	US	0	SERV	5000	CSERV	1	0.319108	0.0878837	0.00342632	0.000706333	0.106655	3.63103	13.4421	0.0443841	0.000399678	1.77857	0.0348359	0.188558	0.223394	0.223394	0.319108	0.0878837	60.56	4384347	422438	0.680892	0.36244
2008	195	SC Firm 195	1	US	0	SERV	5000	CSERV	1	0.396452	0.199889	0.0997275	0.0404276	0.128237	1.98336	13.6459	0.0414837	0.00948345	-0.291621	0.102312	-0.0939854	0.00832625	0.00832625	0.396452	0.199889	37.42	2279091	569376	0.603548	0.375374
2009	195	SC Firm 195	1	US	0	SERV	5000	CSERV	1	0.354249	0.157218	0.0789271	0.028314	0.124423	2.25323	13.7681	0.0446399	0.00401883	-2.77553	0.0144427	0.0478907	0.0623333	0.0623333	0.354249	0.157218	54.81	3181917	593576	0.645751	0.339697
2010	195	SC Firm 195	1	US	0	SERV	5000	CSERV	1	0.420297	0.163176	0.190534	0.0595371	0.112516	2.57572	13.8716	0.0432309	0.0071834	2.53192	0.144945	0.0425073	0.187453	0.187453	0.420297	0.163176	80.39	4646455	906035	0.579703	0.317981
2011	195	SC Firm 195	1	US	0	SERV	5000	CSERV	1	0.509077	0.213721	0.347509	0.1225	0.0877666	2.38197	14.0974	0.0417886	0.0182651	1.60145	0.214243	0.0402019	0.254445	0.254445	0.509077	0.213721	86.16	5755472	1564413	0.490923	0.287935
[truncated: 9,820 more rows]
